# Supplementary material for: Rh(iii)-catalyzed substrate-dependent oxidative (spiro)annulation of isoquinolones with diazonaphthoquinones: selective access to new spirocyclic and oxepine-fused polycyclic compounds
Source: Royal Society of Chemistry journal article supplement (doi:10.1039/d2qo01322c), 2022-01-01

## Supporting Information for

### **Rh(III)-Catalyzed Substrate-Dependent Oxidative (Spiro)annulation of Isoquinolones with Diazonaphthoquinones: Selective Access to New Spirocyclic and Oxepine-Fused Polycyclic Compounds**

*Shenghai Guo,\* Ziyi Zhang, Yuanqing Zhu, Zhaotong Wei, Xinying Zhang and Xuesen Fan\**

*NMPA Key Laboratory for Research and Evaluation of Innovative Drug, Key Laboratory of  
Green Chemical Media and Reactions, Ministry of Education, Collaborative Innovation  
Center of Henan Province for Green Manufacturing of Fine Chemicals, School of Chemistry  
and Chemical Engineering, Henan Normal University, Xinxiang 453007 Henan, China;  
E-mail: [shguo@htu.cn](mailto:shguo@htu.cn); [xuesen.fan@htu.cn](mailto:xuesen.fan@htu.cn)*

#### **Table of Contents**

|                                                                                                                          |            |
|--------------------------------------------------------------------------------------------------------------------------|------------|
| <b>1. General Information</b>                                                                                            | <b>S2</b>  |
| <b>2. Table S1</b>                                                                                                       | <b>S3</b>  |
| <b>3. Table S2</b>                                                                                                       | <b>S5</b>  |
| <b>4. General Procedure for the Preparation of 3, 5, 8 and 11-14</b>                                                     | <b>S6</b>  |
| <b>5. Mechanistic Studies</b>                                                                                            | <b>S11</b> |
| <b>6. X-Ray Crystal Structure and Data of 3aa, 5a, 8e, and 10</b>                                                        | <b>S15</b> |
| <b>7. References</b>                                                                                                     | <b>S23</b> |
| <b>8. Characterization Data of 3aa-3sa, 3ab-3ap, 5a-5j, 8a-8n, and 10-14</b>                                             | <b>S24</b> |
| <b>9. The <sup>1</sup>H, <sup>13</sup>C, and <sup>19</sup>F NMR Spectra of 3aa-3sa, 3ab-3ap, 5a-5j, 8a-8n, and 10-14</b> | <b>S60</b> |

## 1. General Information

Isoquinolones (**1**),<sup>1</sup> diazo compounds (**2**),<sup>2</sup> and [Cp\*RhCl<sub>2</sub>]<sub>2</sub><sup>3</sup> were prepared according to the reported procedures. Unless noted, other commercial reagents and solvents were used without further purification. Melting points were recorded with a micro melting point apparatus and uncorrected. The <sup>1</sup>H NMR spectra were recorded at 400 or 600 MHz. The <sup>13</sup>C NMR spectra were recorded at 100 or 150 MHz. High-resolution mass spectra (HRMS) were collected in ESI mode by using a MicrOTOF mass spectrometer. All reactions were monitored by thin-layer chromatography (TLC) using silica gel plates (silica gel 60 F254 0.25 mm), and components were visualized by observation under UV light (254 and 365 nm).

## 2. Table S1. Detailed Optimization Table for Synthesis of Spirocyclic Product 3aa<sup>a</sup>

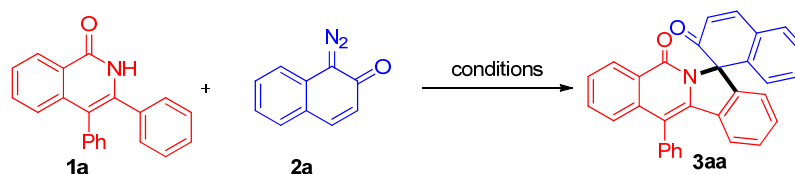

| entry | catalyst                             | oxidant                         | additive              | solvent            | yield (%) <sup>b</sup> |
|-------|--------------------------------------|---------------------------------|-----------------------|--------------------|------------------------|
| 1     | [Cp*RhCl <sub>2</sub> ] <sub>2</sub> | AgOAc                           | PivOH                 | 1,4-dioxane        | 27                     |
| 2     | [Cp*RhCl <sub>2</sub> ] <sub>2</sub> | AgOAc                           | PivOH                 | DCE                | 32                     |
| 3     | [Cp*RhCl <sub>2</sub> ] <sub>2</sub> | AgOAc                           | PivOH                 | DCM                | 23                     |
| 4     | [Cp*RhCl <sub>2</sub> ] <sub>2</sub> | AgOAc                           | PivOH                 | CHCl <sub>3</sub>  | 24                     |
| 5     | [Cp*RhCl <sub>2</sub> ] <sub>2</sub> | AgOAc                           | PivOH                 | PhCH <sub>3</sub>  | 0                      |
| 6     | [Cp*RhCl <sub>2</sub> ] <sub>2</sub> | AgOAc                           | PivOH                 | PhCF <sub>3</sub>  | 0                      |
| 7     | [Cp*RhCl <sub>2</sub> ] <sub>2</sub> | AgOAc                           | PivOH                 | PhCl               | 27                     |
| 8     | [Cp*RhCl <sub>2</sub> ] <sub>2</sub> | AgOAc                           | PivOH                 | CH <sub>3</sub> CN | 48                     |
| 9     | [Cp*RhCl <sub>2</sub> ] <sub>2</sub> | AgOAc                           | PivOH                 | THF                | 28                     |
| 10    | [Cp*RhCl <sub>2</sub> ] <sub>2</sub> | AgOAc                           | PivOH                 | acetone            | 21                     |
| 11    | [Cp*RhCl <sub>2</sub> ] <sub>2</sub> | AgOAc                           | PivOH                 | EA                 | 10                     |
| 12    | [Cp*RhCl <sub>2</sub> ] <sub>2</sub> | AgOAc                           | PivOH                 | MeOH               | 35                     |
| 13    | [Cp*RhCl <sub>2</sub> ] <sub>2</sub> | AgOAc                           | PivOH                 | EtOH               | 26                     |
| 14    | [Cp*RhCl <sub>2</sub> ] <sub>2</sub> | AgOAc                           | PivOH                 | <i>i</i> PrOH      | 0                      |
| 15    | [Cp*RhCl <sub>2</sub> ] <sub>2</sub> | AgOAc                           | PivOH                 | DMSO               | 0                      |
| 16    | [Cp*RhCl <sub>2</sub> ] <sub>2</sub> | AgOAc                           | PivOH                 | DMF                | 58                     |
| 17    | [Cp*RhCl <sub>2</sub> ] <sub>2</sub> | AgOAc                           | HOAc                  | DMF                | 40                     |
| 18    | [Cp*RhCl <sub>2</sub> ] <sub>2</sub> | AgOAc                           | PhCO <sub>2</sub> H   | DMF                | 38                     |
| 19    | [Cp*RhCl <sub>2</sub> ] <sub>2</sub> | AgOAc                           | MesCO <sub>2</sub> H  | DMF                | 40                     |
| 20    | [Cp*RhCl <sub>2</sub> ] <sub>2</sub> | AgOAc                           | 1-AdCO <sub>2</sub> H | DMF                | 52                     |
| 21    | [Cp*RhCl <sub>2</sub> ] <sub>2</sub> | AgOAc                           | TfOH                  | DMF                | 10                     |
| 22    | [Cp*RhCl <sub>2</sub> ] <sub>2</sub> | AgOAc                           | TFA                   | DMF                | 0                      |
| 23    | [Cp*RhCl <sub>2</sub> ] <sub>2</sub> | AgF                             | PivOH                 | DMF                | 55                     |
| 24    | [Cp*RhCl <sub>2</sub> ] <sub>2</sub> | Ag <sub>2</sub> CO <sub>3</sub> | PivOH                 | DMF                | 33                     |

|                 |                                                                           |                                              |       |     |    |
|-----------------|---------------------------------------------------------------------------|----------------------------------------------|-------|-----|----|
| 25              | [Cp*RhCl <sub>2</sub> ] <sub>2</sub>                                      | Ag <sub>2</sub> O                            | PivOH | DMF | 75 |
| 26              | [Cp*RhCl <sub>2</sub> ] <sub>2</sub>                                      | K <sub>2</sub> S <sub>2</sub> O <sub>8</sub> | PivOH | DMF | 0  |
| 27              | [Cp*RhCl <sub>2</sub> ] <sub>2</sub>                                      | Cu(OAc) <sub>2</sub>                         | PivOH | DMF | 0  |
| 28              | [Cp*IrCl <sub>2</sub> ] <sub>2</sub>                                      | Ag <sub>2</sub> O                            | PivOH | DMF | 66 |
| 29              | [Cp*Co(CO)I <sub>2</sub> ]                                                | Ag <sub>2</sub> O                            | PivOH | DMF | 0  |
| 30              | [Cp*Rh(CH <sub>3</sub> CN) <sub>3</sub> ](SbF <sub>6</sub> ) <sub>2</sub> | Ag <sub>2</sub> O                            | PivOH | DMF | 41 |
| 31              | RhCl <sub>3</sub> ·3H <sub>2</sub> O                                      | Ag <sub>2</sub> O                            | PivOH | DMF | 0  |
| 32              | [RuCl <sub>2</sub> ( <i>p</i> -cymene)] <sub>2</sub>                      | Ag <sub>2</sub> O                            | PivOH | DMF | 0  |
| 33              | Pd(OAc) <sub>2</sub>                                                      | Ag <sub>2</sub> O                            | PivOH | DMF | 0  |
| 34              |                                                                           | Ag <sub>2</sub> O                            | PivOH | DMF | 0  |
| 35              | [Cp*RhCl <sub>2</sub> ] <sub>2</sub>                                      |                                              | PivOH | DMF | 0  |
| 36              | [Cp*RhCl <sub>2</sub> ] <sub>2</sub>                                      | Ag <sub>2</sub> O                            |       | DMF | 46 |
| 37 <sup>c</sup> | [Cp*RhCl <sub>2</sub> ] <sub>2</sub>                                      | Ag <sub>2</sub> O                            | PivOH | DMF | 0  |
| 38 <sup>d</sup> | [Cp*RhCl <sub>2</sub> ] <sub>2</sub>                                      | Ag <sub>2</sub> O                            | PivOH | DMF | 25 |
| 39 <sup>e</sup> | [Cp*RhCl <sub>2</sub> ] <sub>2</sub>                                      | Ag <sub>2</sub> O                            | PivOH | DMF | 12 |
| 40 <sup>f</sup> | [Cp*RhCl <sub>2</sub> ] <sub>2</sub>                                      | Ag <sub>2</sub> O                            | PivOH | DMF | 38 |
| 41 <sup>g</sup> | [Cp*RhCl <sub>2</sub> ] <sub>2</sub>                                      | Ag <sub>2</sub> O                            | PivOH | DMF | 29 |
| 42 <sup>h</sup> | [Cp*RhCl <sub>2</sub> ] <sub>2</sub>                                      | Ag <sub>2</sub> O                            | PivOH | DMF | 62 |
| 43 <sup>i</sup> | [Cp*RhCl <sub>2</sub> ] <sub>2</sub>                                      | Ag <sub>2</sub> O                            | PivOH | DMF | 48 |
| 44 <sup>j</sup> | [Cp*RhCl <sub>2</sub> ] <sub>2</sub>                                      | Ag <sub>2</sub> O                            | PivOH | DMF | 44 |

<sup>a</sup>The reactions were run with: **1a** (0.2 mmol), **2a** (0.4 mmol), catalyst (0.005 mmol), oxidant (0.4 mmol), additive (0.4 mmol), solvent (2 mL), air, 100 °C, 3 h. <sup>b</sup>Isolated yields. <sup>c</sup>The reaction was run at 80 °C for 12 h. <sup>d</sup>The reaction was run at 120 °C. <sup>e</sup>The reaction was run at 140 °C. <sup>f</sup>**1a:2a** = 1:1.5. <sup>g</sup>**1a:2a** = 1:3.0. <sup>h</sup>Ag<sub>2</sub>O (0.2 mmol) was used. <sup>i</sup>PivOH (0.2 mmol) was used. <sup>j</sup>Ag<sub>2</sub>O (0.2 mmol) and PivOH (0.2 mmol) was used.

### 3. Table S2. Optimization of Reaction Conditions for the Synthesis of 8a<sup>a</sup>

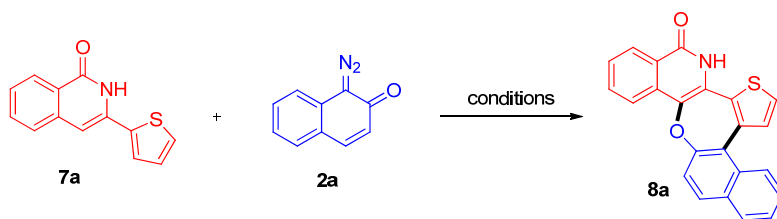

| entry          | catalyst                                 | oxidant                         | solvent     | T (°C)     | yield (%) <sup>b</sup> |
|----------------|------------------------------------------|---------------------------------|-------------|------------|------------------------|
| 1 <sup>c</sup> | [Cp*RhCl <sub>2</sub> ] <sub>2</sub>     | Ag <sub>2</sub> O               | DMF         | 100        | 38                     |
| <b>2</b>       | <b>[Cp*RhCl<sub>2</sub>]<sub>2</sub></b> | <b>Ag<sub>2</sub>O</b>          | <b>DMF</b>  | <b>100</b> | <b>43</b>              |
| 3 <sup>d</sup> | [Cp*RhCl <sub>2</sub> ] <sub>2</sub>     | Ag <sub>2</sub> O               | DMF         | 100        | 38                     |
| 4 <sup>e</sup> | [Cp*RhCl <sub>2</sub> ] <sub>2</sub>     | Ag <sub>2</sub> O               | DMF         | 100        | 29                     |
| 5              | [Cp*RhCl <sub>2</sub> ] <sub>2</sub>     | AgOAc                           | DMF         | 100        | 26                     |
| 6              | [Cp*RhCl <sub>2</sub> ] <sub>2</sub>     | AgF                             | DMF         | 100        | 13                     |
| 7              | [Cp*RhCl <sub>2</sub> ] <sub>2</sub>     | Ag <sub>2</sub> CO <sub>3</sub> | DMF         | 100        | 18                     |
| 8              | [Cp*RhCl <sub>2</sub> ] <sub>2</sub>     | AgSbF <sub>6</sub>              | DMF         | 100        | 0                      |
| 9              | [Cp*RhCl <sub>2</sub> ] <sub>2</sub>     | AgOTf                           | DMF         | 100        | 0                      |
| 10             | [Cp*RhCl <sub>2</sub> ] <sub>2</sub>     | Ag <sub>2</sub> O               | DCE         | 100        | 15                     |
| 11             | [Cp*RhCl <sub>2</sub> ] <sub>2</sub>     | Ag <sub>2</sub> O               | 1,4-dioxane | 100        | 37                     |
| 12             | [Cp*RhCl <sub>2</sub> ] <sub>2</sub>     | Ag <sub>2</sub> O               | toluene     | 100        | 23                     |
| 13             | [Cp*RhCl <sub>2</sub> ] <sub>2</sub>     | Ag <sub>2</sub> O               | MeCN        | 100        | messy                  |
| 14             | [Cp*RhCl <sub>2</sub> ] <sub>2</sub>     | Ag <sub>2</sub> O               | THF         | 100        | messy                  |
| 15             | [Cp*RhCl <sub>2</sub> ] <sub>2</sub>     | Ag <sub>2</sub> O               | DMSO        | 100        | 0                      |
| 16             | [Cp*RhCl <sub>2</sub> ] <sub>2</sub>     | Ag <sub>2</sub> O               | DMA         | 100        | 37                     |
| 17             | [Cp*RhCl <sub>2</sub> ] <sub>2</sub>     | Ag <sub>2</sub> O               | NMP         | 100        | 39                     |
| 18             | [Cp*IrCl <sub>2</sub> ] <sub>2</sub>     | Ag <sub>2</sub> O               | DMF         | 100        | 37                     |
| 19             | [Cp*RhCl <sub>2</sub> ] <sub>2</sub>     | Ag <sub>2</sub> O               | DMF         | 80         | 25                     |
| 20             | [Cp*RhCl <sub>2</sub> ] <sub>2</sub>     | Ag <sub>2</sub> O               | DMF         | 120        | 19                     |

<sup>a</sup>The reactions were run with: **7a** (0.2 mmol), **2a** (0.4 mmol), catalyst (0.005 mmol), oxidant (0.4 mmol), solvent (2 mL), air, 100 °C, 3 h. <sup>b</sup>Isolated yields. <sup>c</sup>PivOH (0.4 mmol) was used as an additive. <sup>d</sup>[Cp\*RhCl<sub>2</sub>]<sub>2</sub> (0.01 mmol) was used. <sup>e</sup>[Cp\*RhCl<sub>2</sub>]<sub>2</sub> (0.002 mmol) was used.

## 4. General Procedure for the Preparation of 3, 5, 8 and 11-14

### 4.1 General Procedure for the Preparation of Compounds 3

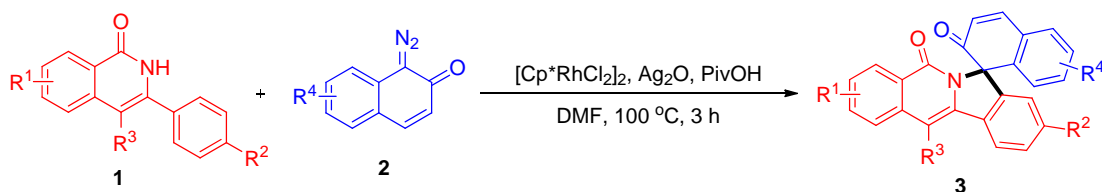

To a reaction tube (15 mL) equipped with a stirring bar were charged with 3,4-disubstituted isoquinolone **1** (0.2 mmol), 1-diazonaphthalen-2(1H)-one **2** (0.4 mmol),  $\text{DMF}$  (2 mL),  $[\text{Cp}^*\text{RhCl}_2]_2$  (3.1 mg, 0.005 mmol),  $\text{Ag}_2\text{O}$  (93 mg, 0.4 mmol), and  $\text{PivOH}$  (41 mg, 0.4 mmol). Then the tube was sealed, and the resulting mixture was stirred at  $100\text{ }^\circ\text{C}$  under air for 3 h until isoquinolone **1** was consumed completely. Next, the reaction was quenched with  $\text{NaHCO}_3$  and extracted with dichloromethane. The organic layer was washed with water and brine and then dried over anhydrous  $\text{Na}_2\text{SO}_4$ . The solvent was removed under reduced pressure and the residue was purified by silica gel chromatography using dichloromethane/ethyl acetate as eluent to give the corresponding product **3**.

### 4.2 General Procedure for the Preparation of Compounds 5

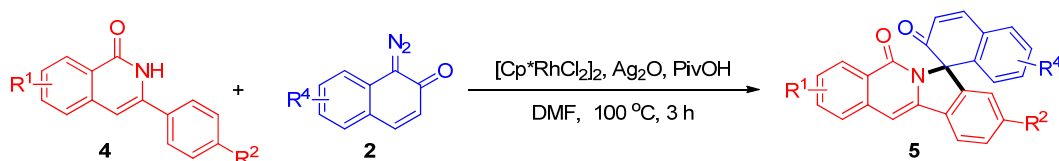

To a reaction tube (15 mL) equipped with a stirring bar were charged with 4-unsubstituted isoquinolone **4** (0.2 mmol), 1-diazonaphthalen-2(1H)-one **2** (0.4 mmol),  $\text{DMF}$  (2 mL),  $[\text{Cp}^*\text{RhCl}_2]_2$  (3.1 mg, 0.005 mmol),  $\text{Ag}_2\text{O}$  (93 mg, 0.4 mmol), and  $\text{PivOH}$  (41 mg, 0.4 mmol). Then the tube was sealed, and the resulting mixture was stirred at  $100\text{ }^\circ\text{C}$  under air for 3 h

until isoquinolone **4** was consumed completely. Next, the reaction was quenched with  $\text{NaHCO}_3$  and extracted with dichloromethane. The organic layer was washed with water and brine and then dried over anhydrous  $\text{Na}_2\text{SO}_4$ . The solvent was removed under reduced pressure and the residue was purified by silica gel chromatography using dichloromethane/ethyl acetate as eluent to give the corresponding product **5**.

#### 4.3 General Procedure for the Preparation of Compounds **8**

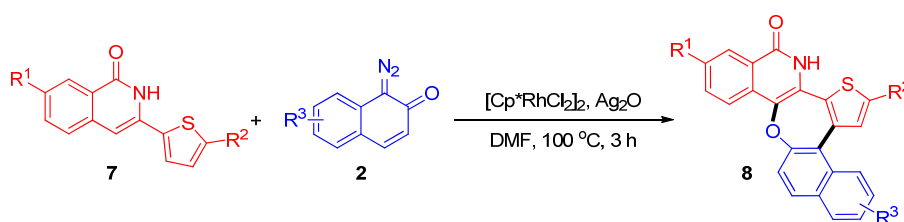

To a reaction tube (15 mL) equipped with a stirring bar were charged with 3-heteroaryl substituted isoquinolone **7** (0.2 mmol), 1-diazonaphthalen-2(1H)-one **2** (0.4 mmol), DMF (2 mL),  $[\text{Cp}^*\text{RhCl}_2]_2$  (3.1 mg, 0.005 mmol), and  $\text{Ag}_2\text{O}$  (93 mg, 0.4 mmol). Then the tube was sealed, and the resulting mixture was stirred at  $100\text{ }^\circ\text{C}$  under air for 3 h until isoquinolone **7** was consumed completely. Next, the reaction was quenched with  $\text{H}_2\text{O}$  and extracted with dichloromethane. The organic layer was washed with water and brine and then dried over anhydrous  $\text{Na}_2\text{SO}_4$ . The solvent was removed under reduced pressure and the residue was purified by silica gel chromatography using petroleum ether /ethyl acetate as eluent to give the corresponding product **8**.

#### 4.4 Gram-Scale Synthesis of **3aa**

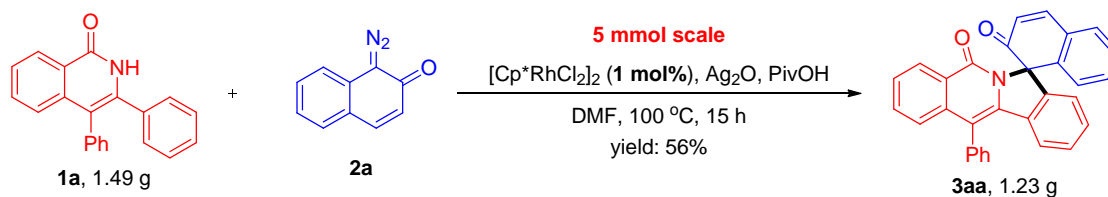

To a reaction tube (100 mL) equipped with a stirring bar were charged with **1a** (1.49 g, 5.0 mmol), **2a** (1.7 g, 10 mmol), DMF (50 mL), [Cp\*RhCl<sub>2</sub>]<sub>2</sub> (31 mg, 0.05 mmol), Ag<sub>2</sub>O (2.3 g, 10 mmol), and PivOH (1.0 g, 10 mmol). Then the tube was sealed, and the resulting mixture was stirred at 100 °C (oil bath) under air for 15 h until **1a** was consumed completely. Next, the reaction was quenched with NaHCO<sub>3</sub> and extracted with dichloromethane. The organic layer was washed with water and brine and then dried over anhydrous Na<sub>2</sub>SO<sub>4</sub>. The solvent was removed under reduced pressure and the residue was purified by silica gel chromatography using dichloromethane/ethyl acetate (30:1) as eluent to afford **3aa** (1.23 g) as brown solid in 56% yield.

#### 4.5 Synthesis of Compound **11**<sup>4</sup>

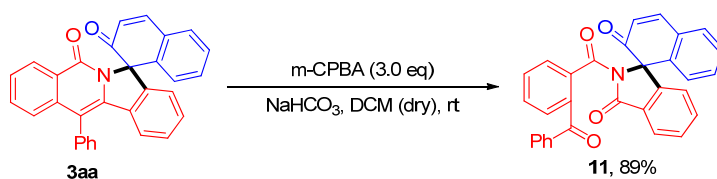

To a stirred suspension of NaHCO<sub>3</sub> (134 mg, 1.6 mmol) in dry dichloromethane (5 mL) was added *m*-CPBA (85% purity, 122 mg, 0.6 mmol) and then the mixture was stirred at room temperature for 15 minutes. Next, **3aa** (88 mg, 0.2 mmol) was added and the resulting mixture was stirred at room temperature for 30 h. The reaction was diluted with dichloromethane and washed with saturated NaHCO<sub>3</sub> and brine. After being dried over anhydrous Na<sub>2</sub>SO<sub>4</sub>, the solvent was removed under vacuum and the residue was purified by silica gel chromatography using petroleum ether/ethyl acetate (3:1) as eluent to afford **11** (84 mg) as white solid in 89% yield.

#### 4.6 Synthesis of Compound **12**<sup>5</sup>



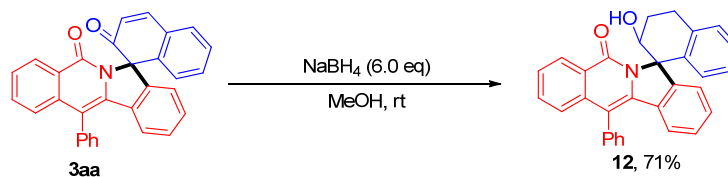

To a solution of **3aa** (88 mg, 0.2 mmol) in methanol (2 mL) was added NaBH<sub>4</sub> (45 mg, 1.2 mmol) at room temperature. Then the reaction mixture was stirred at the same temperature for 24 h until the complete consumption of **3aa**. Next, the reaction was quenched with water and extracted with EtOAc three times, and the combined organic layer was washed with brine and dried over anhydrous Na<sub>2</sub>SO<sub>4</sub>. Then, the solvent was removed under reduced pressure and the residue was purified by silica gel chromatography using petroleum ether/ethyl acetate (5:1) as eluent to afford **12** (63 mg) as white solid in 71% yield.

#### 4.7 Synthesis of Compound 13<sup>6</sup>

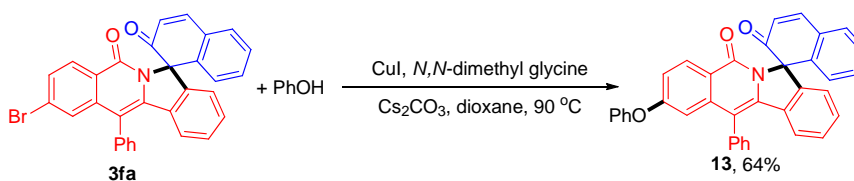

To a reaction tube (15 mL) equipped with a stirring bar were added **3fa** (51.6 mg, 0.1 mmol), phenol (28.2 mg, 0.3 mmol), *N,N*-dimethyl glycine hydrochloride (4.2 mg, 0.03 mmol), Cs<sub>2</sub>CO<sub>3</sub> (65.2 mg, 0.2 mmol), CuI (1.9 mg, 0.01 mmol) and dioxane (1 mL). Then the resulting mixture was stirred at 90 °C for 24 h under argon atmosphere. Upon completion, it was diluted with ethyl acetate (20 mL) and washed with water and brine. The organic layer was dried over anhydrous Na<sub>2</sub>SO<sub>4</sub> and evaporated under reduced pressure. The residue was purified by silica gel chromatography using petroleum ether/ethyl acetate (2:1) as eluent to afford **13** (34 mg) as yellow solid in 64% yield.

#### 4.8 Synthesis of Compound **14**<sup>6</sup>

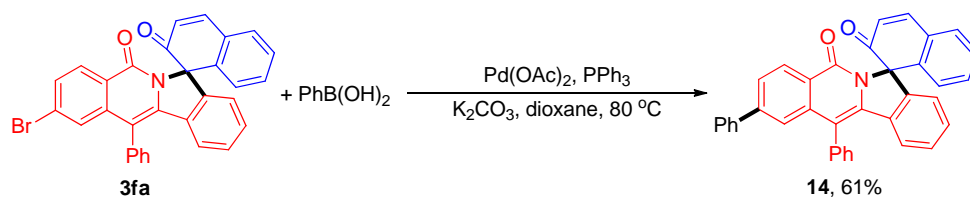

To a reaction tube (15 mL) equipped with a stirring bar were added **3fa** (51.6 mg, 0.1 mmol), phenylboronic acid (36.6 mg, 0.3 mmol),  $\text{PPh}_3$  (15.7 mg, 0.06 mmol),  $\text{K}_2\text{CO}_3$  (55.3 mg, 0.4 mmol),  $\text{Pd(OAc)}_2$  (2.2 mg, 0.01 mmol) and dioxane (1 mL). After the tube was sealed, the mixture was stirred at  $80\text{ }^\circ\text{C}$  (oil bath) for 24 h. Upon completion, it was diluted with ethyl acetate (10 mL) and washed with water and brine. The organic layer was dried over anhydrous  $\text{Na}_2\text{SO}_4$  and evaporated under reduced pressure. The residue was purified by column chromatography on silica gel with petroleum ether/ethyl acetate (2:1) as the eluent to give **14** (32 mg) as white solid in 61% yield.

## 5. Mechanistic Studies

### 5.1 Control Experiment

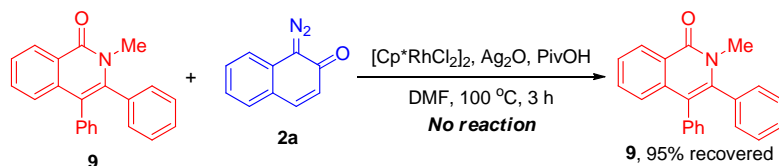

To a reaction tube (15 mL) equipped with a stirring bar were charged with *N*-methyl substituted isoquinolone **9** (62 mg, 0.2 mmol), **2a** (68 mg, 0.4 mmol), DMF (2 mL),  $[\text{Cp}^*\text{RhCl}_2]_2$  (3.1 mg, 0.005 mmol),  $\text{Ag}_2\text{O}$  (93 mg, 0.4 mmol), and  $\text{PivOH}$  (41 mg, 0.4 mmol). Then the tube was sealed, and the resulting mixture was stirred at 100 °C under air for 3 h. After isolation and purification, isoquinolone **9** was recovered in 95% yield, implying that the *NH* unit of isoquinolone is crucial for the ortho  $\text{C}(\text{sp}^2)\text{-H}$  bond activation.

### 5.2 Competitive Reaction

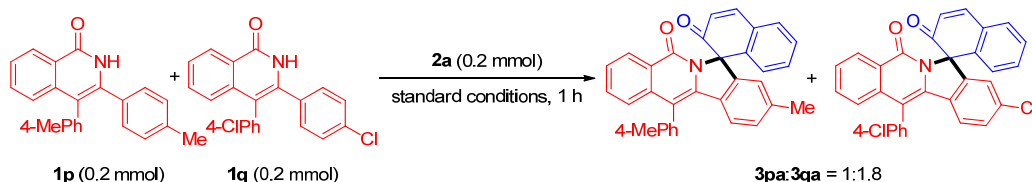

To a reaction tube (15 mL) equipped with a stirring bar were charged with **1p** (0.2 mmol), **1q** (0.2 mmol), **2a** (0.2 mmol), DMF (4 mL),  $[\text{Cp}^*\text{RhCl}_2]_2$  (0.01 mmol),  $\text{Ag}_2\text{O}$  (0.8 mmol), and  $\text{PivOH}$  (0.8 mmol). Then the tube was sealed, and the resulting mixture was stirred at 100 °C for 1 h until **2a** was consumed completely. Next, the reaction was quenched with  $\text{NaHCO}_3$  and extracted with dichloromethane. The organic layer was washed with water and brine and then dried over anhydrous  $\text{Na}_2\text{SO}_4$ . The solvent was removed under reduced pressure and the

residue was purified by silica gel chromatography using dichloromethane/ethyl acetate (30:1) as eluent to give a mixture of **3pa** and **3qa** (78 mg). Upon analyzing the  $^1\text{H}$  NMR spectra as shown in Figure S1, the ratio of **3pa** and **3qa** was determined as 1:1.8, indicating that the ortho C-H bond cleavage might occur through a concerted metalation-deprotonation (CMD) mechanism.

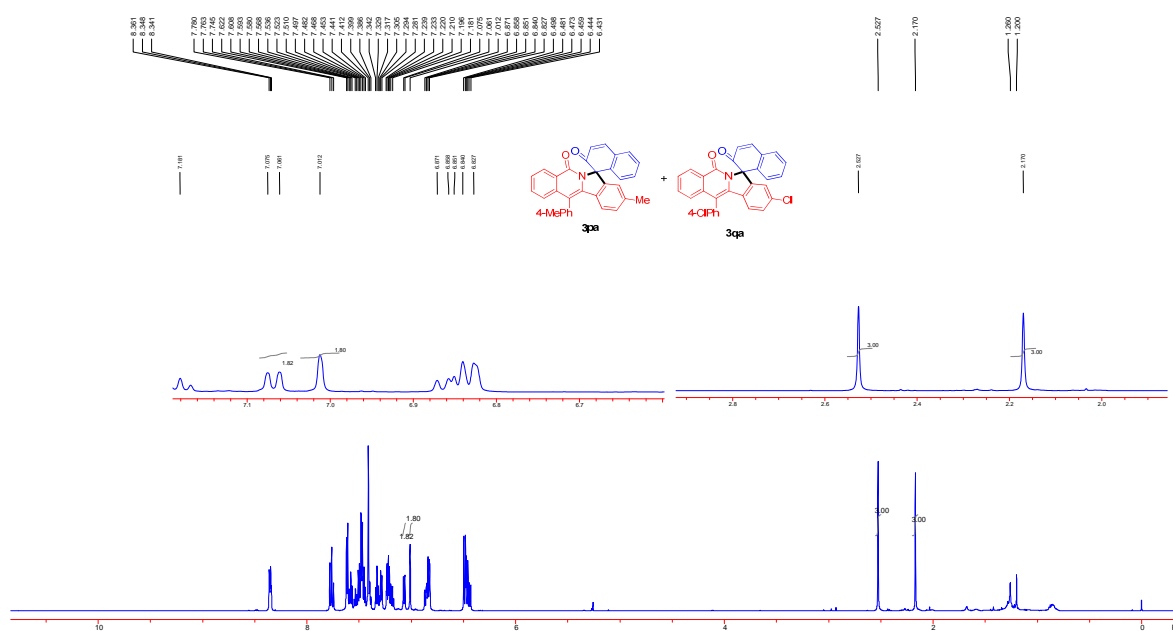

**Figure S1.** The  $^1\text{H}$  NMR spectra of a mixture of **3pa** and **3qa**

### 5.3 Intermolecular KIE

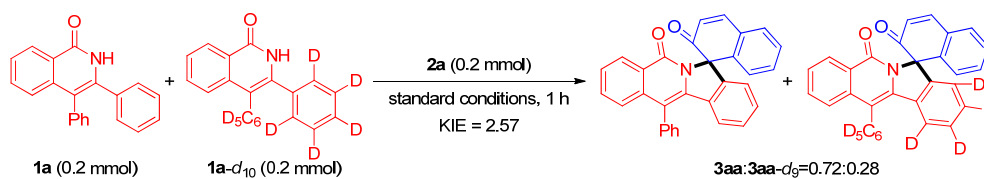

To a reaction tube (15 mL) equipped with a stirring bar were charged with **1a** (0.2 mmol), **1a-d<sub>10</sub>** (0.2 mmol), **2a** (0.2 mmol), DMF (4 mL),  $[\text{Cp}^*\text{RhCl}_2]_2$  (0.01 mmol),  $\text{Ag}_2\text{O}$  (0.8 mmol), and  $\text{PivOH}$  (0.8 mmol). Then the tube was sealed, and the resulting mixture was stirred at 100  $^\circ\text{C}$  for 1 h until **2a** was consumed completely. Next, the reaction was quenched with  $\text{NaHCO}_3$

and extracted with dichloromethane. The extract was washed with water and brine and then dried over anhydrous Na<sub>2</sub>SO<sub>4</sub>. The solvent was removed under reduced pressure and the residue was purified by silica gel chromatography using dichloromethane/ethyl acetate (30:1) as eluent to give a mixture of **3aa** and **3aa-d<sub>9</sub>** (47 mg). Upon analyzing the <sup>1</sup>H NMR spectra as shown in Figure S2, the ratio of **3aa** and **3aa-d<sub>9</sub>** was determined as 0.72:0.28. Accordingly, the KIE (kinetic isotopic effect) value was 2.57, suggesting that the C(sp<sup>2</sup>)-H bond activation might be involved in the turnover-limiting step.

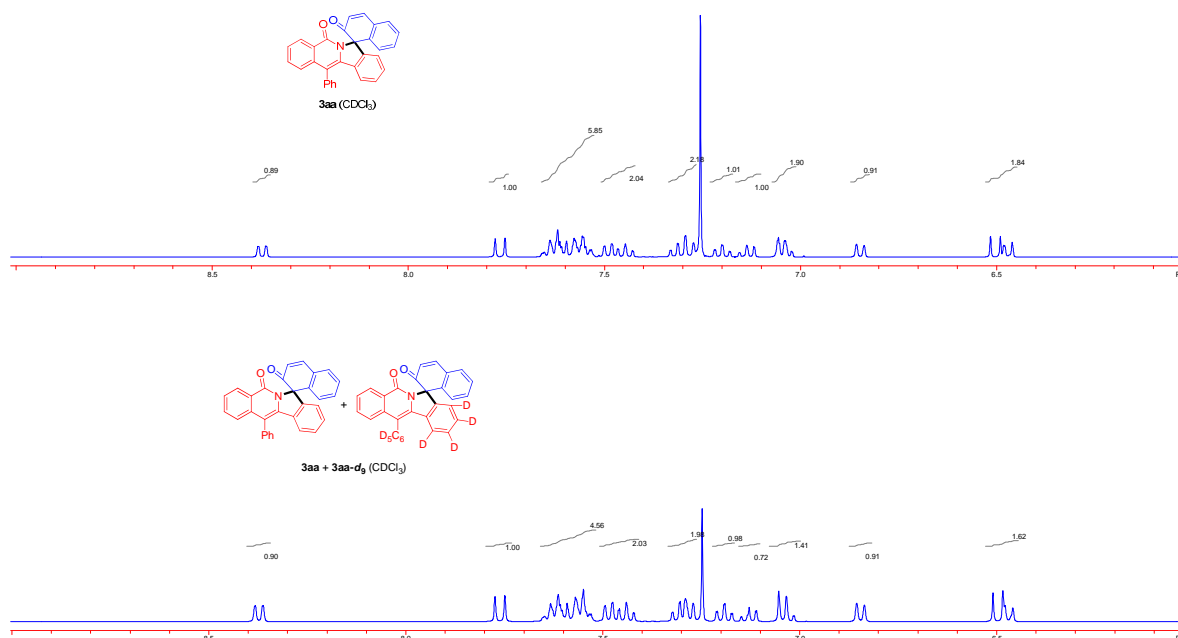

**Figure S2.** The <sup>1</sup>H NMR spectra of a mixture of **3aa** and **3aa-d<sub>9</sub>**

#### 5.4 Parallel KIE Study

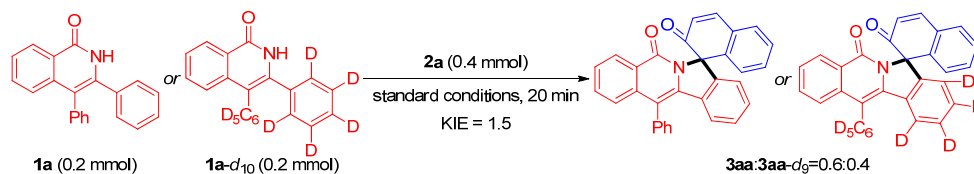

Two parallel reactions with **1a** or deuterated substrate **1a-d<sub>10</sub>** were performed under the standard conditions. Suspensions of **1a** (0.2 mmol) or **1a-d<sub>10</sub>** (0.2 mmol), **2a** (0.4 mmol), DMF (2 mL), [Cp\*RhCl<sub>2</sub>]<sub>2</sub> (0.05 mmol), Ag<sub>2</sub>O (0.4 mmol), PivOH (0.4 mmol) were stirred side-by-side at 100 °C for 20 min. Both reactions were quenched with saturated NaHCO<sub>3</sub> and combined rapidly. The mixture was extracted with dichloromethane. The extract was washed with water and brine and dried over anhydrous Na<sub>2</sub>SO<sub>4</sub>. The solvent was removed under reduced pressure and the crude product was purified by silica gel chromatography using dichloromethane/ethyl acetate (30:1) as eluent to afford a mixture of **3aa** and **3aa-d<sub>9</sub>** (54 mg). Upon analyzing the <sup>1</sup>H NMR spectra as shown in Figure S3, the ratio of **3aa** and **3aa-d<sub>9</sub>** was determined as 0.6:0.4 and a value of  $k_H/k_D = 1.5$  (parallel KIE) was calculated, suggesting that the C(sp<sup>2</sup>)-H bond activation might be involved in the turnover-limiting step.

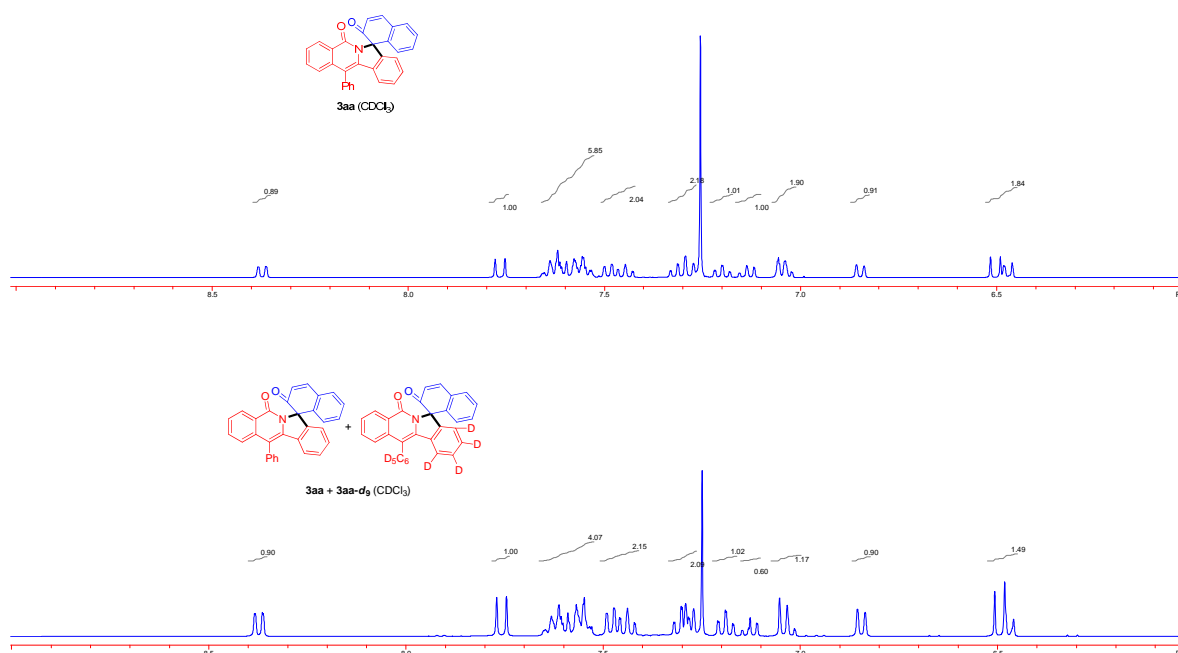

**Figure S3.** The <sup>1</sup>H NMR spectra of a mixture of **3aa** and **3aa-d<sub>9</sub>**

## 6. X-Ray Crystal Structure and Data of 3aa, 5a, 8e, and 10

### (1) Compound 3aa

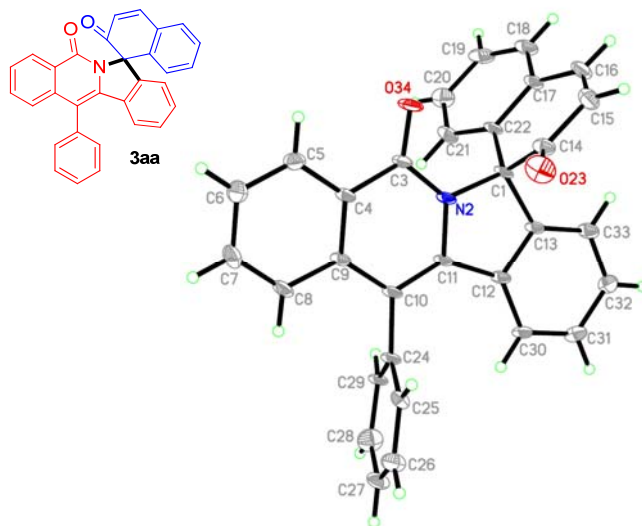

**Figure S4.** X-Ray Crystal Structure of **3aa** with 30% ellipsoid probability

**X-ray structure determination.** Single crystals suitable for X-ray diffraction were obtained by slow evaporation of the solvent from a petroleum ether/ethyl acetate (3:1) solution of **3aa**. Crystal data collection and refinement parameters of **3aa** are summarized in Table S3. Intensity data were collected at 293 K on a SuperNova Dual diffractometer using mirror-monochromated Cu K $\alpha$  radiation,  $\lambda = 1.54184 \text{ \AA}$ . The data were corrected for decay, Lorentz, and polarization effects as well as absorption and beam corrections based on the multi-scan technique. Using Olex2, the structure was solved with the SHELXT structure solution program using Intrinsic Phasing Method and refined with the SHELXL refinement package using Least Squares minimisation. Nonhydrogen atoms were refined with anisotropic displacement parameters. The H-atoms were either located or calculated and subsequently treated with a riding model.

**Table S3. Crystallographic Data and Structure Refinement Results of 3aa**

|                                                                             |                                                     |
|-----------------------------------------------------------------------------|-----------------------------------------------------|
| Empirical formula                                                           | 2(C <sub>31</sub> H <sub>19</sub> NO <sub>2</sub> ) |
| Formula weight                                                              | 874.94                                              |
| Temp, K                                                                     | 293(2)                                              |
| Crystal system                                                              | monoclinic                                          |
| Space group                                                                 | P2 <sub>1</sub> /c                                  |
| <i>a</i> , Å                                                                | 10.3989(2)                                          |
| <i>b</i> , Å                                                                | 28.6103(4)                                          |
| <i>c</i> , Å                                                                | 15.0726(2)                                          |
| $\alpha$ (°)                                                                | 90                                                  |
| $\beta$ (°)                                                                 | 102.494(2)                                          |
| $\gamma$ (°)                                                                | 90                                                  |
| Volume, Å <sup>3</sup>                                                      | 4378.14(12)                                         |
| <i>Z</i>                                                                    | 4                                                   |
| <i>d</i> <sub>calc</sub> , g cm <sup>-3</sup>                               | 1.327                                               |
| $\lambda$ , Å                                                               | 1.54184                                             |
| $\mu$ , mm <sup>-1</sup>                                                    | 0.654                                               |
| No. of data collected                                                       | 18749                                               |
| No. of unique data                                                          | 7566                                                |
| <i>R</i> <sub>int</sub>                                                     | 0.0660                                              |
| Goodness-of-fit on <i>F</i> <sup>2</sup>                                    | 1.055                                               |
| <i>R</i> <sub>1</sub> , <i>wR</i> <sub>2</sub> ( <i>I</i> > 2σ( <i>I</i> )) | 0.0896, 0.2495                                      |
| <i>R</i> <sub>1</sub> , <i>wR</i> <sub>2</sub> (all data)                   | 0.1104, 0.2774                                      |



## (2) Compound 5a

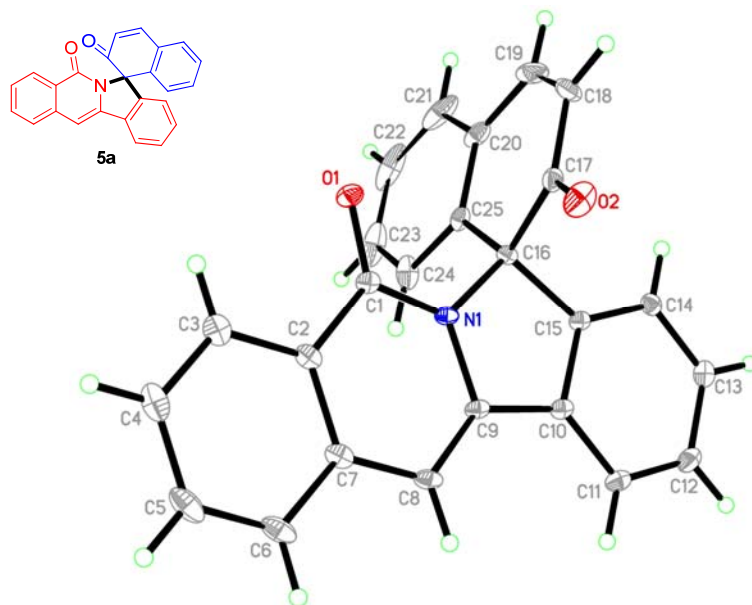

**Figure S5.** X-Ray Crystal Structure of **5a** with 30% ellipsoid probability

**X-ray structure determination.** Single crystals suitable for X-ray diffraction were obtained by slow evaporation of the solvent from a dichloromethane/ethyl acetate (30:1) solution of **5a**. Crystal data collection and refinement parameters of **5a** are summarized in Table S4. Intensity data were collected at 150 K on a SuperNova Dual diffractometer using mirror-monochromated Cu K $\alpha$  radiation,  $\lambda = 1.54184$  Å. The data were corrected for decay, Lorentz, and polarization effects as well as absorption and beam corrections based on the multi-scan technique. Using Olex2, the structure was solved with the SHELXT structure solution program using Intrinsic Phasing Method and refined with the SHELXL refinement package using Least Squares minimisation. Nonhydrogen atoms were refined with anisotropic displacement parameters. The H-atoms were either located or calculated and subsequently treated with a riding model.

**Table S4. Crystallographic Data and Structure Refinement Results of 5a**

|                                                                              |                                                 |
|------------------------------------------------------------------------------|-------------------------------------------------|
| Empirical formula                                                            | C <sub>25</sub> H <sub>15</sub> NO <sub>2</sub> |
| Formula weight                                                               | 361.38                                          |
| Temp, K                                                                      | 149.99(10)                                      |
| Crystal system                                                               | monoclinic                                      |
| Space group                                                                  | P2 <sub>1</sub> /c                              |
| <i>a</i> , Å                                                                 | 12.4723(3)                                      |
| <i>b</i> , Å                                                                 | 13.8610(3)                                      |
| <i>c</i> , Å                                                                 | 10.2625(2)                                      |
| $\alpha$ (°)                                                                 | 90                                              |
| $\beta$ (°)                                                                  | 101.425(2)                                      |
| $\gamma$ (°)                                                                 | 90                                              |
| Volume, Å <sup>3</sup>                                                       | 1739.01(7)                                      |
| <i>Z</i>                                                                     | 4                                               |
| <i>d</i> <sub>calc</sub> , g cm <sup>-3</sup>                                | 1.380                                           |
| $\lambda$ , Å                                                                | 1.54184                                         |
| $\mu$ , mm <sup>-1</sup>                                                     | 0.699                                           |
| No. of data collected                                                        | 6920                                            |
| No. of unique data                                                           | 3307                                            |
| <i>R</i> <sub>int</sub>                                                      | 0.0230                                          |
| Goodness-of-fit on <i>F</i> <sup>2</sup>                                     | 1.054                                           |
| <i>R</i> <sub>1</sub> , w <i>R</i> <sub>2</sub> ( <i>I</i> > 2σ( <i>I</i> )) | 0.0556, 0.1548                                  |
| <i>R</i> <sub>1</sub> , w <i>R</i> <sub>2</sub> (all data)                   | 0.0609, 0.1608                                  |

### (3) Compound **8e**

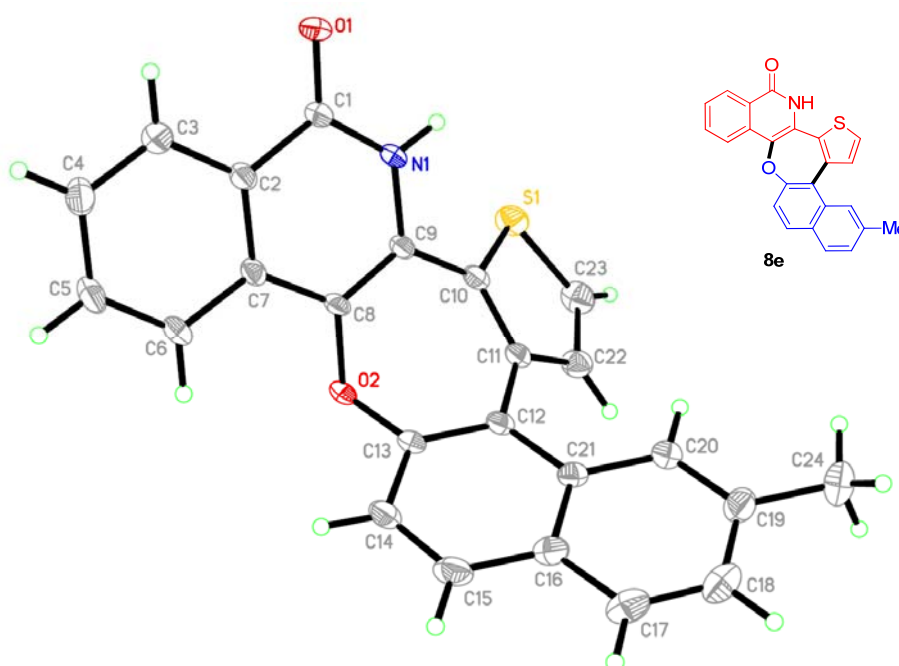

**Figure S6.** X-Ray Crystal Structure of **8e** with 30% ellipsoid probability

**X-ray structure determination.** Single crystals suitable for X-ray diffraction were obtained by slow evaporation of the solvent from a petroleum ether/ethyl acetate (3:1) solution of **8e**. Crystal data collection and refinement parameters of **8e** are summarized in Table S5. Intensity data were collected at 293 K on a SuperNova Dual diffractometer using mirror-monochromated Cu K $\alpha$  radiation,  $\lambda = 1.54184 \text{ \AA}$ . The data were corrected for decay, Lorentz, and polarization effects as well as absorption and beam corrections based on the multi-scan technique. Using Olex2, the structure was solved with the SHELXT structure solution program using Intrinsic Phasing Method and refined with the SHELXL refinement package using Least Squares minimisation. Nonhydrogen atoms were refined with anisotropic displacement parameters. The H-atoms were either located or calculated and subsequently treated with a riding model.

**Table S5. Crystallographic Data and Structure Refinement Results of 8e**

|                                                                              |                                                   |
|------------------------------------------------------------------------------|---------------------------------------------------|
| Empirical formula                                                            | C <sub>24</sub> H <sub>15</sub> NO <sub>2</sub> S |
| Formula weight                                                               | 381.43                                            |
| Temp, K                                                                      | 293(2)                                            |
| Crystal system                                                               | triclinic                                         |
| Space group                                                                  | P-1                                               |
| <i>a</i> , Å                                                                 | 8.1960(4)                                         |
| <i>b</i> , Å                                                                 | 9.4755(5)                                         |
| <i>c</i> , Å                                                                 | 13.0705(7)                                        |
| $\alpha$ (°)                                                                 | 77.839(4)                                         |
| $\beta$ (°)                                                                  | 78.582(4)                                         |
| $\gamma$ (°)                                                                 | 76.499(4)                                         |
| Volume, Å <sup>3</sup>                                                       | 952.98(9)                                         |
| <i>Z</i>                                                                     | 2                                                 |
| <i>d</i> <sub>calc</sub> , g cm <sup>-3</sup>                                | 1.329                                             |
| $\lambda$ , Å                                                                | 1.54184                                           |
| $\mu$ , mm <sup>-1</sup>                                                     | 1.662                                             |
| No. of data collected                                                        | 7306                                              |
| No. of unique data                                                           | 3622                                              |
| <i>R</i> <sub>int</sub>                                                      | 0.0316                                            |
| Goodness-of-fit on <i>F</i> <sup>2</sup>                                     | 1.059                                             |
| <i>R</i> <sub>1</sub> , w <i>R</i> <sub>2</sub> ( <i>I</i> > 2σ( <i>I</i> )) | 0.0562, 0.1480                                    |
| <i>R</i> <sub>1</sub> , w <i>R</i> <sub>2</sub> (all data)                   | 0.0636, 0.1563                                    |

#### (4) Compound 10

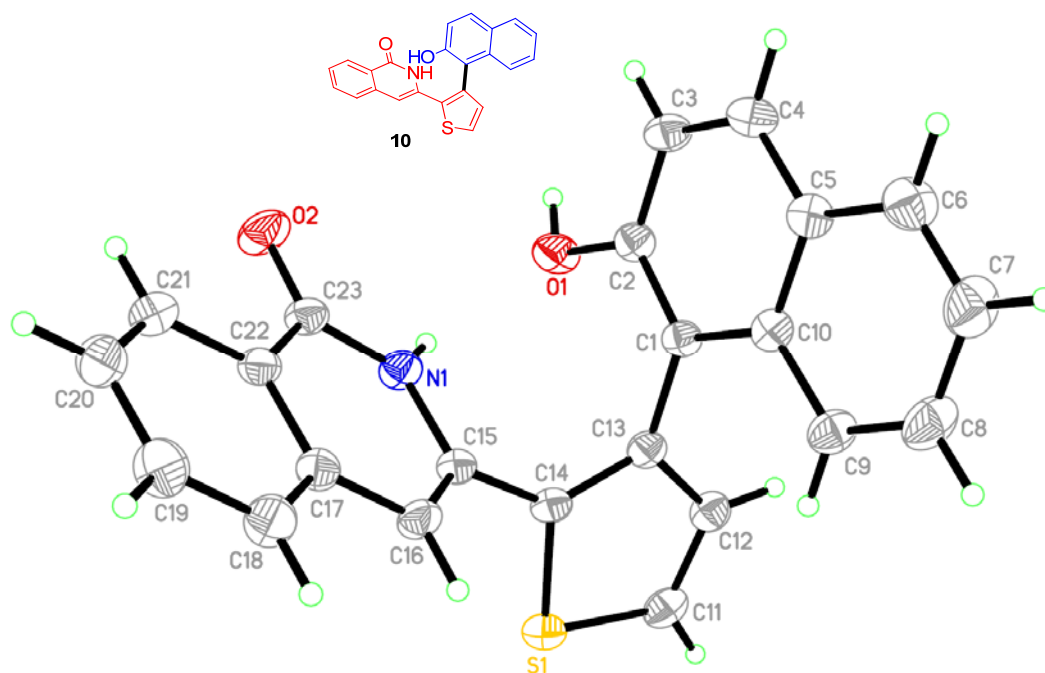

**Figure S7.** X-Ray Crystal Structure of **10** with 30% ellipsoid probability

**X-ray structure determination.** Single crystals suitable for X-ray diffraction were obtained by slow evaporation of the solvent from a petroleum ether/ethyl acetate (3:1) solution of **10**. Crystal data collection and refinement parameters of **10** are summarized in Table S6. Intensity data were collected at 293 K on a SuperNova Dual diffractometer using mirror-monochromated Cu K $\alpha$  radiation,  $\lambda = 1.54184 \text{ \AA}$ . The data were corrected for decay, Lorentz, and polarization effects as well as absorption and beam corrections based on the multi-scan technique. Using Olex2, the structure was solved with the SHELXT structure solution program using Intrinsic Phasing Method and refined with the SHELXL refinement package using Least Squares minimisation. Nonhydrogen atoms were refined with anisotropic displacement parameters. The H-atoms were either located or calculated and subsequently treated with a riding model.

**Table S6. Crystallographic Data and Structure Refinement Results of 10**

|                                                                              |                                                   |
|------------------------------------------------------------------------------|---------------------------------------------------|
| Empirical formula                                                            | C <sub>23</sub> H <sub>15</sub> NO <sub>2</sub> S |
| Formula weight                                                               | 369.42                                            |
| Temp, K                                                                      | 293(2)                                            |
| Crystal system                                                               | triclinic                                         |
| Space group                                                                  | P-1                                               |
| <i>a</i> , Å                                                                 | 8.8200(4)                                         |
| <i>b</i> , Å                                                                 | 10.4849(5)                                        |
| <i>c</i> , Å                                                                 | 10.5524(4)                                        |
| $\alpha$ (°)                                                                 | 96.384(4)                                         |
| $\beta$ (°)                                                                  | 111.049(4)                                        |
| $\gamma$ (°)                                                                 | 90.540(4)                                         |
| Volume, Å <sup>3</sup>                                                       | 903.81(7)                                         |
| <i>Z</i>                                                                     | 2                                                 |
| <i>d</i> <sub>calc</sub> , g cm <sup>-3</sup>                                | 1.357                                             |
| $\lambda$ , Å                                                                | 1.54184                                           |
| $\mu$ , mm <sup>-1</sup>                                                     | 1.732                                             |
| No. of data collected                                                        | 6160                                              |
| No. of unique data                                                           | 3422                                              |
| <i>R</i> <sub>int</sub>                                                      | 0.0256                                            |
| Goodness-of-fit on <i>F</i> <sup>2</sup>                                     | 1.073                                             |
| <i>R</i> <sub>1</sub> , w <i>R</i> <sub>2</sub> ( <i>I</i> > 2σ( <i>I</i> )) | 0.0438, 0.1151                                    |
| <i>R</i> <sub>1</sub> , w <i>R</i> <sub>2</sub> (all data)                   | 0.0504, 0.1207                                    |

## 7. References

- (1) (a) Guimond, N.; Gouliaras, C.; Fagnou, K. Rhodium(III)-Catalyzed Isoquinolone Synthesis: The N-O Bond as a Handle for C-N Bond Formation and Catalyst Turnover. *J. Am. Chem. Soc.* **2010**, *132*, 6908–6909. (b) Guimond, N.; Gorelsky, S. I.; Fagnou, K. Rhodium(III)-Catalyzed Heterocycle Synthesis Using an Internal Oxidant: Improved Reactivity and Mechanistic Studies. *J. Am. Chem. Soc.* **2011**, *133*, 6449–6457. (c) Shi, Y.; Zhu, X.; Mao, H.; Hu, H.; Zhu, C.; Cheng, Y. Synthesis of Functionalized Isoquinolin-1(2*H*)-ones by Copper-Catalyzed  $\alpha$ -Arylation of Ketones with 2-Halobenzamides. *Chem. Eur. J.* **2013**, *19*, 11553–11557.
- (2) Bera, S.; Roy, S.; Pal, S. C.; Anoop, A.; Samanta, R. Iridium(III)-Catalyzed Intermolecular Mild N-Arylation of Aliphatic Amides Using Quinoid Carbene: A Migratory Insertion-Based Approach. *ACS Catal.* **2021**, *11*, 10847–10854.
- (3) Fujita, K.-i.; Takahashi, Y.; Owaki, M.; Yamamoto, K.; Yamaguchi, R. Synthesis of Five-, Six-, and Seven-Membered Ring Lactams by Cp\*Rh Complex-Catalyzed Oxidative N-Heterocyclization of Amino Alcohols. *Org. Lett.* **2004**, *6*, 2785–2788.
- (4) Guo, S.; Sun, L.; Liu, Y.; Ma, N.; Zhang, X.; Fan, X. Rh(III)-Catalyzed Oxidative Spirocyclization of Isoquinolones with  $\alpha$ -Diazo-1,3-indandiones. *Org. Lett.* **2019**, *21*, 4082–4086.
- (5) Han, X.; Kong, L.; Feng, J.; Li, X. Rhodium(III)-Catalyzed Synthesis of Spirocyclic Isoindole *N*-Oxides and Isobenzofuranones via C–H Activation and Spiroannulation. *Chem. Commun.* **2020**, *56*, 5528–5531.
- (6) Song, X.; Zhou, Q.; Zhao, J.; Jiang, Y.; Zhang, X.; Zhang, X.; Fan, X. Synthesis of 1,3-Benzodiazepines through [5 + 2] Annulation of N-Aryl Amidines with Propargylic Esters. *Org. Lett.* **2020**, *22*, 9506–9512.

## 8. Characterization Data of 3aa-3sa, 3ab-3ap, 5a-5j, 8a-8n, and 10-14

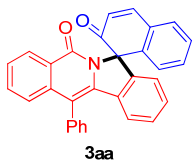

### 12-Phenyl-2'*H*,5*H*-spiro[isoindolo[2,1-*b*]isoquinoline-7,1'-naphthalene]-2',5-dione (3aa):

Dichloromethane/ethyl acetate (30:1) as eluent; brown solid (65 mg, 75%), mp >300 °C. <sup>1</sup>H NMR (DMSO-*d*<sub>6</sub>, 400 MHz) δ 8.17 (dd, *J* = 7.6, 0.8 Hz, 1H), 8.09 (d, *J* = 10.0 Hz, 1H), 7.76-7.65 (m, 6H), 7.58-7.50 (m, 2H), 7.41 (td, *J* = 7.6, 0.8 Hz, 1H), 7.29-7.15 (m, 4H), 7.10 (d, *J* = 7.6 Hz, 1H), 6.89 (d, *J* = 7.6 Hz, 1H), 6.50 (d, *J* = 10.0 Hz, 1H), 6.36 (d, *J* = 8.0 Hz, 1H); <sup>13</sup>C NMR (CDCl<sub>3</sub>, 100 MHz) δ 192.9, 159.3, 146.4, 142.4, 140.4, 139.1, 138.9, 134.9, 133.5, 132.5, 131.4, 131.1, 130.9, 130.1, 129.8, 129.7, 129.5, 129.4, 128.9, 128.6, 128.4, 127.9, 126.6, 125.60, 125.56, 125.3, 125.2, 124.9, 121.6, 114.6, 76.1. HRMS (ESI) calcd for C<sub>31</sub>H<sub>19</sub>NNaO<sub>2</sub> [M + Na]<sup>+</sup> 460.1308, found 460.1301.

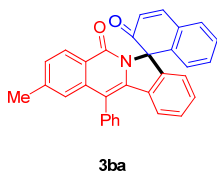

### 2-Methyl-12-phenyl-2'*H*,5*H*-spiro[isoindolo[2,1-*b*]isoquinoline-7,1'-naphthalene]-2',5-di

**one (3ba):** Dichloromethane/ethyl acetate (30:1) as eluent; white solid (56 mg, 62%), mp 201-202 °C. <sup>1</sup>H NMR (CDCl<sub>3</sub>, 400 MHz) δ 8.26 (d, *J* = 8.0 Hz, 1H), 7.76 (d, *J* = 10.0 Hz, 1H), 7.67-7.60 (m, 3H), 7.57-7.52 (m, 2H), 7.48 (dd, *J* = 7.6, 0.8 Hz, 1H), 7.32-7.26 (m, 2H), 7.19 (td, *J* = 7.6, 1.2 Hz, 1H), 7.14-7.10 (m, 1H), 7.05-7.01 (m, 3H), 6.84 (d, *J* = 8.0 Hz, 1H), 6.49 (d, *J* = 10.0 Hz, 1H), 6.43-6.41 (m, 1H), 2.37 (s, 3H); <sup>13</sup>C NMR (CDCl<sub>3</sub>, 150 MHz) δ 193.0, 159.2, 146.3, 143.1, 142.4, 140.6, 139.2, 138.9, 135.0, 133.6, 131.4, 131.1, 130.8, 130.1,



129.6, 129.5, 129.4, 128.8, 128.5, 128.3, 128.2, 127.9, 125.3, 125.23, 125.15, 124.9, 123.4, 121.5, 114.4, 76.0, 22.0 (one  $^{13}\text{C}$  signal was not observed). HRMS (ESI) calcd for  $\text{C}_{32}\text{H}_{21}\text{NNaO}_2$   $[\text{M} + \text{Na}]^+$  474.1464, found 474.1443.

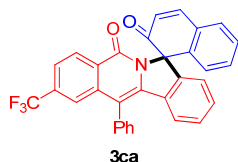

**12-Phenyl-2-(trifluoromethyl)-2'H,5H-spiro[isoindolo[2,1-b]isoquinoline-7,1'-naphthalene]-2',5-dione (3ca):** Dichloromethane/ethyl acetate (45:1) as eluent; brown solid (76 mg, 75%), mp 193-194 °C.  $^1\text{H}$  NMR ( $\text{CDCl}_3$ , 600 MHz)  $\delta$  8.48 (d,  $J = 8.4$  Hz, 1H), 7.78 (d,  $J = 9.6$  Hz, 1H), 7.68-7.63 (m, 4H), 7.56-7.54 (m, 3H), 7.51 (d,  $J = 7.2$  Hz, 1H), 7.33 (td,  $J = 7.8$ , 1.2 Hz, 1H), 7.22 (td,  $J = 7.8$ , 1.2 Hz, 1H), 7.19-7.16 (m, 1H), 7.08-7.06 (m, 2H), 6.83 (d,  $J = 7.8$  Hz, 1H), 6.51 (d,  $J = 10.2$  Hz, 1H), 6.47 (d,  $J = 8.4$  Hz, 1H);  $^{13}\text{C}$  NMR ( $\text{CDCl}_3$ , 150 MHz)  $\delta$  192.5, 158.5, 146.6, 142.5, 140.5, 139.8, 139.3, 134.1 (q,  $J = 31.8$  Hz, 1C), 133.8, 132.9, 131.2, 130.99, 130.98, 130.31, 130.28, 130.0, 129.7, 129.5, 129.13, 129.06, 129.0, 128.6, 127.5, 125.2, 125.1, 123.7 (q,  $J = 271.2$  Hz, 1C), 122.6 (q,  $J = 4.4$  Hz, 1C), 122.5 (q,  $J = 3.3$  Hz, 1C), 121.7, 114.1, 76.4 (one  $^{13}\text{C}$  signal was not observed).  $^{19}\text{F}$  NMR ( $\text{CDCl}_3$ , 564 MHz)  $\delta$  -62.95 (s). HRMS (ESI) calcd for  $\text{C}_{32}\text{H}_{18}\text{F}_3\text{NNaO}_2$   $[\text{M} + \text{Na}]^+$  528.1182, found 528.1170.

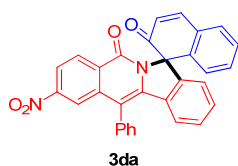

**2-Nitro-12-phenyl-2'H,5H-spiro[isoindolo[2,1-b]isoquinoline-7,1'-naphthalene]-2',5-dione (3da):** Dichloromethane/ethyl acetate (30:1) as eluent; yellow solid (83 mg, 86%), mp >300 °C.  $^1\text{H}$  NMR ( $\text{CDCl}_3$ , 600 MHz)  $\delta$  8.50 (d,  $J = 9.0$  Hz, 1H), 8.17 (dd,  $J = 8.4$ , 2.4 Hz, 1H),

8.13 (d,  $J = 2.4$  Hz, 1H), 7.80 (d,  $J = 9.6$  Hz, 1H), 7.70-7.66 (m, 3H), 7.56-7.55 (m, 2H), 7.52 (d,  $J = 7.8$  Hz, 1H), 7.35 (t,  $J = 7.2$  Hz, 1H), 7.24-7.19 (m, 2H), 7.09 (t,  $J = 8.4$  Hz, 2H), 6.84 (d,  $J = 7.8$  Hz, 1H), 6.52-6.49 (m, 2H);  $^{13}\text{C}$  NMR ( $\text{CDCl}_3$ , 150 MHz)  $\delta$  192.2, 158.1, 150.5, 146.7, 142.5, 141.4, 140.0, 139.5, 133.3, 132.6, 131.2, 131.04, 130.96, 130.7, 130.4, 130.2, 129.92, 129.90, 129.5, 129.4, 129.2, 128.9, 128.8, 125.4, 125.2, 125.0, 121.7, 120.9, 120.1, 114.0, 76.6. HRMS (ESI) calcd for  $\text{C}_{31}\text{H}_{18}\text{N}_2\text{NaO}_4$   $[\text{M} + \text{Na}]^+$  505.1159, found 505.1130.

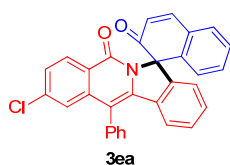

**2-Chloro-12-phenyl-2'*H*,5*H*-spiro[isoindolo[2,1-*b*]isoquinoline-7,1'-naphthalene]-2',5-dione (3ea):** Dichloromethane/ethyl acetate (30:1) as eluent; white solid (89 mg, 94%), mp >300 °C.  $^1\text{H}$  NMR ( $\text{CDCl}_3$ , 400 MHz)  $\delta$  8.28 (d,  $J = 8.4$  Hz, 1H), 7.76 (d,  $J = 10.0$  Hz, 1H), 7.66-7.61 (m, 3H), 7.55-7.48 (m, 3H), 7.38 (dd,  $J = 8.4, 1.6$  Hz, 1H), 7.32 (t,  $J = 7.2$  Hz, 1H), 7.23-7.13 (m, 3H), 7.06-7.03 (m, 2H), 6.83 (d,  $J = 8.0$  Hz, 1H), 6.49 (d,  $J = 10.0$  Hz, 1H), 6.45 (d,  $J = 8.0$  Hz, 1H);  $^{13}\text{C}$  NMR ( $\text{CDCl}_3$ , 100 MHz)  $\delta$  192.6, 158.7, 146.5, 142.6, 140.6, 140.3, 140.1, 139.3, 134.1, 133.1, 131.3, 131.0, 130.9, 130.23, 130.16, 129.9, 129.6, 129.5, 129.0, 128.5, 127.1, 125.2, 125.15, 125.08, 124.9, 123.9, 121.6, 113.6, 76.2 (two  $^{13}\text{C}$  signals were not observed). HRMS (ESI) calcd for  $\text{C}_{31}\text{H}_{18}\text{ClNNaO}_2$   $[\text{M} + \text{Na}]^+$  494.0918, found 494.0900.

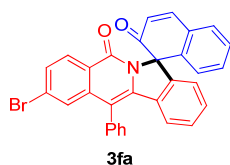

**2-Bromo-12-phenyl-2'H,5H-spiro[isoindolo[2,1-b]isoquinoline-7,1'-naphthalene]-2',5-dione (3fa):** Dichloromethane/ethyl acetate (30:1) as eluent; brown solid (81 mg, 79%), mp >300 °C. <sup>1</sup>H NMR (CDCl<sub>3</sub>, 600 MHz) δ 8.21 (d, *J* = 8.4 Hz, 1H), 7.77 (d, *J* = 10.2 Hz, 1H), 7.66-7.62 (m, 3H), 7.55-7.49 (m, 4H), 7.40 (d, *J* = 1.8 Hz, 1H), 7.32 (td, *J* = 7.2, 0.6 Hz, 1H), 7.21 (td, *J* = 7.8, 1.2 Hz, 1H), 7.17-7.14 (m, 1H), 7.06-7.04 (m, 2H), 6.83 (d, *J* = 7.2 Hz, 1H), 6.49 (d, *J* = 10.2 Hz, 1H), 6.43 (d, *J* = 7.8 Hz, 1H); <sup>13</sup>C NMR (CDCl<sub>3</sub>, 150 MHz) δ 192.6, 158.8, 146.5, 142.5, 140.7, 140.3, 140.0, 134.1, 133.1, 131.3, 131.0, 130.9, 130.22, 130.15, 129.9, 129.8, 129.64, 129.62, 129.5, 129.0, 128.5, 128.02, 127.97, 125.2, 125.14, 125.09, 124.2, 121.6, 113.4, 76.2 (one <sup>13</sup>C signal was not observed). HRMS (ESI) calcd for C<sub>31</sub>H<sub>18</sub>BrNNaO<sub>2</sub> [M + Na]<sup>+</sup> 538.0413, found 538.0408.

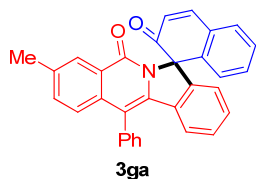

**3-Methyl-12-phenyl-2'H,5H-spiro[isoindolo[2,1-b]isoquinoline-7,1'-naphthalene]-2',5-dione (3ga):** Dichloromethane/ethyl acetate (30:1) as eluent; white solid (52 mg, 58%), mp 196-197 °C. <sup>1</sup>H NMR (CDCl<sub>3</sub>, 400 MHz) δ 8.18 (s, 1H), 7.75 (d, *J* = 10.0 Hz, 1H), 7.64-7.58 (m, 3H), 7.56-7.52 (m, 2H), 7.48 (dd, *J* = 7.6, 0.8 Hz, 1H), 7.39 (dd, *J* = 8.4, 2.0 Hz, 1H), 7.30 (td, *J* = 7.2, 1.2 Hz, 1H), 7.20-7.16 (m, 2H), 7.13-7.09 (m, 1H), 7.04-7.00 (m, 2H), 6.83 (d, *J* = 7.6 Hz, 1H), 6.49 (d, *J* = 10.0 Hz, 1H), 6.46 (d, *J* = 8.4 Hz, 1H), 2.42 (s, 3H); <sup>13</sup>C NMR (CDCl<sub>3</sub>, 100 MHz) δ 193.0, 159.2, 146.3, 142.3, 140.6, 138.0, 136.8, 135.0, 133.9, 133.6, 131.4, 131.1, 130.8, 130.1, 129.6, 129.5, 129.3, 128.8, 128.5, 128.3, 127.6, 125.5, 125.3, 125.2, 124.7, 121.6, 114.6, 76.0, 21.3 (one <sup>13</sup>C signal was not observed). HRMS (ESI) calcd for C<sub>32</sub>H<sub>21</sub>NNaO<sub>2</sub> [M + Na]<sup>+</sup> 474.1464, found 474.1444.

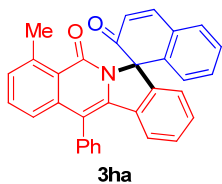

**4-Methyl-12-phenyl-2'*H*,5*H*-spiro[isoindolo[2,1-*b*]isoquinoline-7,1'-naphthalene]-2',5-dione (3ha):** Dichloromethane/ethyl acetate (30:1) as eluent; white solid (35 mg, 39%), mp >300 °C. <sup>1</sup>H NMR (CDCl<sub>3</sub>, 400 MHz) δ 7.75 (d, *J* = 10.0 Hz, 1H), 7.64-7.58 (m, 3H), 7.53-7.47 (m, 3H), 7.39 (t, *J* = 7.6 Hz, 1H), 7.30 (td, *J* = 7.6, 1.2 Hz, 1H), 7.21-7.18 (m, 2H), 7.12-7.08 (m, 2H), 7.03-6.99 (m, 2H), 6.87 (d, *J* = 7.6 Hz, 1H), 6.50 (d, *J* = 10.0 Hz, 1H), 6.37 (dd, *J* = 7.6, 1.2 Hz, 1H), 2.83 (s, 3H); <sup>13</sup>C NMR (CDCl<sub>3</sub>, 100 MHz) δ 193.1, 159.9, 146.4, 142.3, 140.90, 140.87, 138.8, 135.6, 133.5, 131.5, 131.4, 131.2, 130.8, 130.2, 129.74, 129.66, 129.6, 129.4, 129.3, 128.8, 128.5, 128.2, 125.4, 125.0, 124.9, 124.2, 124.0, 121.5, 114.4, 76.3, 24.0 (one <sup>13</sup>C signal was not observed). HRMS (ESI) calcd for C<sub>32</sub>H<sub>21</sub>NNaO<sub>2</sub> [M + Na]<sup>+</sup> 474.1464, found 474.1445.

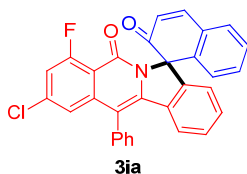

**2-Chloro-4-fluoro-12-phenyl-2'*H*,5*H*-spiro[isoindolo[2,1-*b*]isoquinoline-7,1'-naphthalene]-2',5-dione (3ia):** Dichloromethane/ethyl acetate (30:1) as eluent; white solid (60 mg, 61%), mp 226-227 °C. <sup>1</sup>H NMR (CDCl<sub>3</sub>, 600 MHz) δ 7.75 (d, *J* = 10.2 Hz, 1H), 7.66-7.62 (m, 3H), 7.52-7.50 (m, 2H), 7.48 (d, *J* = 7.8 Hz, 1H), 7.33-7.30 (m, 1H), 7.23-7.20 (m, 1H), 7.17 (t, *J* = 7.8 Hz, 1H), 7.09-7.02 (m, 3H), 7.00 (s, 1H), 6.83 (d, *J* = 7.8 Hz, 1H), 6.48 (d, *J* = 10.2 Hz, 1H), 6.38 (d, *J* = 8.4 Hz, 1H); <sup>13</sup>C NMR (CDCl<sub>3</sub>, 150 MHz) δ 192.3, 163.0 (d, *J* = 266.9 Hz, 1C), 156.0 (d, *J* = 3.3 Hz, 1C), 146.5, 142.83, 142.80, 141.4, 139.7, 139.0 (d, *J* = 12.0 Hz, 1C),

134.0, 132.8, 131.3, 131.1, 130.9, 130.5, 130.3, 130.0, 129.7, 129.6, 129.1, 129.0, 128.5, 125.3, 125.2, 125.0, 121.7, 121.1 (d,  $J = 3.3$  Hz, 1C), 114.3 (d,  $J = 24.0$  Hz, 1C), 113.2 (d,  $J = 5.4$  Hz, 1C), 112.6 (d,  $J = 2.3$  Hz, 1C), 76.2.  $^{19}\text{F}$  NMR ( $\text{CDCl}_3$ , 376 MHz)  $\delta$  -107.67 (d,  $J = 9.4$  Hz). HRMS (ESI) calcd for  $\text{C}_{31}\text{H}_{17}\text{ClFNNaO}_2$  [ $\text{M} + \text{Na}$ ] $^+$  512.0824, found 512.0811.

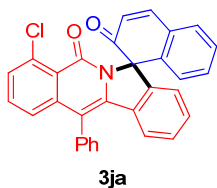

**4-Chloro-12-phenyl-2'*H*,5*H*-spiro[isoindolo[2,1-*b*]isoquinoline-7,1'-naphthalene]-2',5-dione (3ja):**

Dichloromethane/ethyl acetate (45:1) as eluent; brown solid (58 mg, 61%), mp >300 °C.  $^1\text{H}$  NMR ( $\text{CDCl}_3$ , 600 MHz)  $\delta$  7.74 (d,  $J = 10.2$  Hz, 1H), 7.63-7.58 (m, 3H), 7.52-7.50 (m, 2H), 7.47 (d,  $J = 7.2$  Hz, 1H), 7.42 (d,  $J = 6.6$  Hz, 1H), 7.38 (t,  $J = 7.8$  Hz, 1H), 7.30 (t,  $J = 7.2$  Hz, 1H), 7.20 (t,  $J = 7.2$  Hz, 1H), 7.17 (d,  $J = 7.2$  Hz, 1H), 7.13 (t,  $J = 7.2$  Hz, 1H), 7.04-7.02 (m, 2H), 6.86 (d,  $J = 7.8$  Hz, 1H), 6.49 (d,  $J = 10.2$  Hz, 1H), 6.36 (d,  $J = 8.4$  Hz, 1H);  $^{13}\text{C}$  NMR ( $\text{CDCl}_3$ , 150 MHz)  $\delta$  192.5, 157.4, 146.5, 142.6, 142.3, 140.2, 140.0, 136.0, 135.0, 133.0, 131.9, 131.4, 131.2, 130.9, 130.3, 130.1, 129.8, 129.7, 129.6, 129.5, 128.9, 128.8, 128.3, 125.4, 125.1, 124.9, 124.8, 122.2, 121.6, 113.6, 76.5. HRMS (ESI) calcd for  $\text{C}_{31}\text{H}_{18}\text{ClNNaO}_2$  [ $\text{M} + \text{Na}$ ] $^+$  494.0918, found 494.0914.

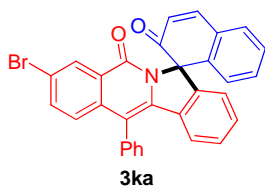

**3-Bromo-12-phenyl-2'*H*,5*H*-spiro[isoindolo[2,1-*b*]isoquinoline-7,1'-naphthalene]-2',5-dione (3ka):**

Dichloromethane/ethyl acetate (45:1) as eluent; white solid (89 mg, 86%), mp >300 °C.  $^1\text{H}$  NMR ( $\text{CDCl}_3$ , 600 MHz)  $\delta$  8.49 (d,  $J = 1.8$  Hz, 1H), 7.77 (d,  $J = 10.2$  Hz, 1H),

7.65-7.59 (m, 4H), 7.54-7.49 (m, 3H), 7.32 (td,  $J = 7.2, 0.6$  Hz, 1H), 7.22-7.19 (m, 1H), 7.16-7.14 (m, 2H), 7.06-7.03 (m, 2H), 6.82 (d,  $J = 7.8$  Hz, 1H), 6.49 (d,  $J = 10.2$  Hz, 1H), 6.46 (d,  $J = 7.8$  Hz, 1H);  $^{13}\text{C}$  NMR ( $\text{CDCl}_3$ , 150 MHz)  $\delta$  192.6, 158.1, 146.5, 142.4, 140.0, 139.4, 137.9, 135.5, 134.3, 133.2, 131.3, 131.0, 130.9, 130.5, 130.2, 130.0, 129.8, 129.53, 129.52, 129.0, 128.9, 128.5, 127.3, 126.8, 125.2, 125.1, 125.0, 121.7, 120.7, 114.0, 76.3. HRMS (ESI) calcd for  $\text{C}_{31}\text{H}_{18}\text{BrNNaO}_2$   $[\text{M} + \text{Na}]^+$  538.0413, found 538.0402.

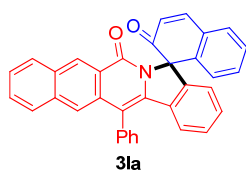

**14-Phenyl-2'H,7H-spiro[benzo[g]isoindolo[2,1-b]isoquinoline-5,1'-naphthalene]-2',7-dione (3la):** Dichloromethane/ethyl acetate (30:1) as eluent; yellow solid (67 mg, 69%), mp >300 °C.  $^1\text{H}$  NMR ( $\text{CDCl}_3$ , 400 MHz)  $\delta$  8.97 (s, 1H), 7.97 (d,  $J = 8.0$  Hz, 1H), 7.78 (s, 1H), 7.76-7.75 (m, 1H), 7.69-7.60 (m, 6H), 7.53-7.44 (m, 3H), 7.31 (td,  $J = 7.6, 0.8$  Hz, 1H), 7.20 (td,  $J = 8.0, 1.2$  Hz, 1H), 7.15-7.11 (m, 1H), 7.06-7.02 (m, 2H), 6.92 (d,  $J = 7.6$  Hz, 1H), 6.50 (d,  $J = 10.0$  Hz, 1H), 6.47-6.45 (m, 1H);  $^{13}\text{C}$  NMR ( $\text{CDCl}_3$ , 100 MHz)  $\delta$  193.4, 159.9, 146.4, 142.4, 141.0, 137.7, 135.41, 135.36, 135.2, 133.5, 131.49, 131.46, 131.2, 130.9, 130.1, 129.8, 129.7, 129.49, 129.48, 129.4, 129.3, 128.9, 128.7, 128.4, 128.2, 128.0, 126.2, 125.3, 125.2, 125.0, 124.5, 124.0, 121.6, 114.6, 75.9. HRMS (ESI) calcd for  $\text{C}_{35}\text{H}_{21}\text{NNaO}_2$   $[\text{M} + \text{Na}]^+$  510.1464, found 510.1446.

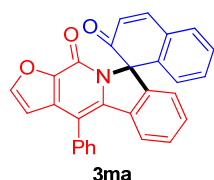

**4-Phenyl-2*H*,11*H*-spiro[furo[3',2':4,5]pyrido[2,1-*a*]isoindole-9,1'-naphthalene]-2',11-dione (3ma):** Dichloromethane/ethyl acetate (7:1) as eluent; brown solid (48 mg, 56%), mp 273-274 °C. <sup>1</sup>H NMR (CDCl<sub>3</sub>, 600 MHz) δ 7.76 (d, *J* = 10.2 Hz, 1H), 7.71 (d, *J* = 1.8 Hz, 1H), 7.63-7.58 (m, 4H), 7.56-7.53 (m, 1H), 7.49 (d, *J* = 7.2 Hz, 1H), 7.32 (td, *J* = 7.8, 1.2 Hz, 1H), 7.21 (td, *J* = 7.8, 1.2 Hz, 1H), 7.15-7.12 (m, 1H), 7.07 (t, *J* = 7.2 Hz, 2H), 6.93-6.92 (m, 1H), 6.80 (d, *J* = 7.8 Hz, 1H), 6.51-6.49 (m, 2H); <sup>13</sup>C NMR (CDCl<sub>3</sub>, 150 MHz) δ 192.5, 150.1, 148.6, 146.6, 142.7, 142.5, 139.9, 139.8, 136.6, 134.4, 133.0, 130.9, 130.4, 130.20, 130.18, 129.53, 129.48, 129.4, 129.1, 128.8, 128.7, 128.4, 125.3, 124.8, 124.1, 121.6, 110.8, 107.3, 76.4. HRMS (ESI) calcd for C<sub>29</sub>H<sub>17</sub>NNaO<sub>3</sub> [M + Na]<sup>+</sup> 450.1101, found 450.1091.

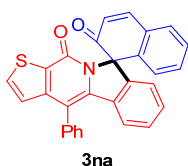

**4'-Phenyl-2*H*,11'*H*-spiro[naphthalene-1,9'-thieno[3',2':4,5]pyrido[2,1-*a*]isoindole]-2,11'-dione (3na):** Dichloromethane/ethyl acetate (15:1) as eluent; white solid (58 mg, 65%), mp >300 °C. <sup>1</sup>H NMR (DMSO-*d*<sub>6</sub>, 400 MHz) δ 8.09 (d, *J* = 5.2 Hz, 1H), 8.08 (d, *J* = 10.0 Hz, 1H), 7.73-7.64 (m, 5H), 7.57 (d, *J* = 8.4 Hz, 1H), 7.42 (td, *J* = 7.6, 0.8 Hz, 1H), 7.31-7.25 (m, 2H), 7.22-7.18 (m, 1H), 7.11 (d, *J* = 7.6 Hz, 1H), 6.94 (d, *J* = 5.2 Hz, 1H), 6.86 (d, *J* = 7.6 Hz, 1H), 6.62 (d, *J* = 7.6 Hz, 1H), 6.50 (d, *J* = 10.0 Hz, 1H); <sup>13</sup>C NMR (CDCl<sub>3</sub>, 100 MHz) δ 192.6, 155.4, 148.3, 146.4, 142.4, 140.7, 139.9, 135.1, 133.4, 133.2, 130.9, 130.7, 130.4, 130.1, 129.7, 129.53, 129.45, 129.2, 128.9, 128.8, 128.7, 128.4, 125.3, 125.1, 124.5, 124.4, 121.7, 113.5, 76.0. HRMS (ESI) calcd for C<sub>29</sub>H<sub>17</sub>NNaO<sub>2</sub>S [M + Na]<sup>+</sup> 466.0872, found 466.0864.

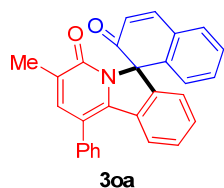

**3'-Methyl-1'-phenyl-2*H*,4'*H*-spiro[naphthalene-1,6'-pyrido[2,1-*a*]isoindole]-2,4'-dione**

**(3oa):** Dichloromethane/ethyl acetate (15:1) as eluent; brown solid (39 mg, 48%), mp 236-237 °C. <sup>1</sup>H NMR (CDCl<sub>3</sub>, 600 MHz) δ 7.74 (d, *J* = 9.6 Hz, 1H), 7.56-7.51 (m, 4H), 7.49-7.46 (m, 2H), 7.36 (s, 1H), 7.31 (t, *J* = 7.2 Hz, 1H), 7.22 (t, *J* = 7.2 Hz, 1H), 7.15 (t, *J* = 7.2 Hz, 1H), 7.10-7.07 (m, 1H), 7.03 (t, *J* = 7.2 Hz, 2H), 6.76 (d, *J* = 7.8 Hz, 1H), 6.49 (d, *J* = 9.6 Hz, 1H), 2.16 (s, 3H); <sup>13</sup>C NMR (CDCl<sub>3</sub>, 150 MHz) δ 192.1, 159.7, 146.3, 142.5, 142.1, 141.5, 139.4, 136.9, 133.3, 130.9, 130.1, 129.9, 129.7, 129.6, 128.9, 128.75, 128.73, 128.4, 128.2, 125.5, 124.8, 124.1, 121.7, 116.6, 76.6, 16.3. HRMS (ESI) calcd for C<sub>28</sub>H<sub>19</sub>NNaO<sub>2</sub> [M + Na]<sup>+</sup> 424.1308, found 424.1290.

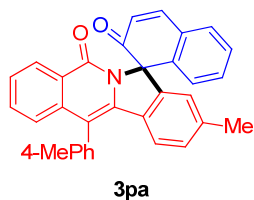

**9-Methyl-12-(*p*-tolyl)-2'*H*,5'*H*-spiro[isoindolo[2,1-*b*]isoquinoline-7,1'-naphthalene]-2',5'-dione**

**(3pa):** Dichloromethane/ethyl acetate (30:1) as eluent; yellow solid (68 mg, 73%), mp 206-207 °C. <sup>1</sup>H NMR (CDCl<sub>3</sub>, 600 MHz) δ 8.35 (dd, *J* = 7.8, 0.6 Hz, 1H), 7.76 (d, *J* = 10.2 Hz, 1H), 7.56-7.54 (m, 1H), 7.49 (d, *J* = 7.2 Hz, 1H), 7.42-7.40 (m, 5H), 7.32-7.28 (m, 2H), 7.19 (td, *J* = 7.8, 0.6 Hz, 1H), 6.87 (d, *J* = 8.4 Hz, 1H), 6.84 (d, *J* = 7.8 Hz, 1H), 6.82 (s, 1H), 6.50 (d, *J* = 10.2 Hz, 1H), 6.43 (d, *J* = 8.4 Hz, 1H), 2.54 (s, 3H), 2.18 (s, 3H); <sup>13</sup>C NMR (CDCl<sub>3</sub>, 150 MHz) δ 193.1, 159.3, 146.3, 142.7, 140.6, 140.3, 139.4, 139.1, 138.2, 132.3, 131.9, 131.2,



131.0, 130.92, 130.85, 130.3, 130.1, 130.0, 129.9, 129.5, 128.3, 127.8, 126.3, 125.44, 125.42, 125.37, 125.2, 124.8, 121.8, 113.8, 75.9, 21.54, 21.52. HRMS (ESI) calcd for C<sub>33</sub>H<sub>23</sub>NNaO<sub>2</sub> [M + Na]<sup>+</sup> 488.1621, found 488.1601.

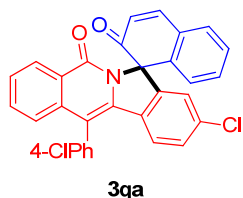

**9-Chloro-12-(4-chlorophenyl)-2'H,5H-spiro[isoindolo[2,1-b]isoquinoline-7,1'-naphthalen e]-2',5-dione (3qa):** Dichloromethane/ethyl acetate (45:1) as eluent; brown solid (68 mg, 67%), mp >300 °C. <sup>1</sup>H NMR (CDCl<sub>3</sub>, 600 MHz) δ 8.36 (d, *J* = 7.8 Hz, 1H), 7.78 (d, *J* = 10.2 Hz, 1H), 7.63 (d, *J* = 8.4 Hz, 2H), 7.59 (td, *J* = 8.4, 1.2 Hz, 1H), 7.52-7.45 (m, 4H), 7.35 (td, *J* = 7.2, 0.6 Hz, 1H), 7.24-7.21 (m, 2H), 7.08 (dd, *J* = 8.4, 1.8 Hz, 1H), 7.01 (d, *J* = 1.8 Hz, 1H), 6.84 (d, *J* = 7.8 Hz, 1H), 6.50 (d, *J* = 10.2 Hz, 1H), 6.47 (d, *J* = 8.4 Hz, 1H); <sup>13</sup>C NMR (CDCl<sub>3</sub>, 150 MHz) δ 192.2, 159.1, 146.7, 143.8, 139.5, 138.7, 138.1, 135.9, 135.0, 133.1, 132.8, 132.7, 132.5, 131.7, 131.1, 130.4, 130.1, 129.9, 129.5, 129.4, 128.8, 128.0, 127.0, 125.7, 125.6, 125.3, 125.2, 125.1, 122.1, 113.3, 75.7. HRMS (ESI) calcd for C<sub>31</sub>H<sub>17</sub>Cl<sub>2</sub>NNaO<sub>2</sub> [M + Na]<sup>+</sup> 528.0529, found 528.0501.

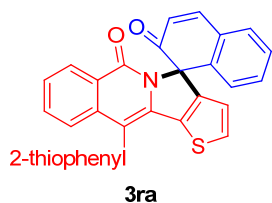

**11'-(Thiophen-2-yl)-2H,6'H-spiro[naphthalene-1,4'-thieno[2',3':3,4]pyrrolo[1,2-b]isoquinoline]-2,6'-dione (3ra):** Dichloromethane/ethyl acetate (45:1) as eluent; yellow solid (59 mg, 66%), mp >300 °C. <sup>1</sup>H NMR (CDCl<sub>3</sub>, 400 MHz) δ 8.25 (d, *J* = 7.6 Hz, 1H), 7.64 (d, *J* = 10.0

Hz, 1H), 7.54 (m, 2H), 7.46 (d,  $J = 8.0$  Hz, 1H), 7.39-7.33 (m, 2H), 7.26-7.20 (m, 3H), 7.17-7.14 (m, 2H), 6.86 (d,  $J = 7.2$  Hz, 1H), 6.55 (d,  $J = 4.8$  Hz, 1H), 6.40 (d,  $J = 10.0$  Hz, 1H);  $^{13}\text{C}$  NMR ( $\text{CDCl}_3$ , 100 MHz)  $\delta$  191.3, 159.1, 148.4, 146.2, 139.3, 139.0, 138.1, 134.9, 134.0, 132.8, 130.9, 130.2, 129.8, 129.5, 128.7, 128.1, 127.9, 126.5, 125.3, 125.13, 125.10, 118.9, 104.0, 75.6 (three  $^{13}\text{C}$  signals were not observed). HRMS (ESI) calcd for  $\text{C}_{27}\text{H}_{15}\text{NNaO}_2\text{S}_2$  [ $\text{M} + \text{Na}$ ] $^+$  472.0436, found 472.0430.

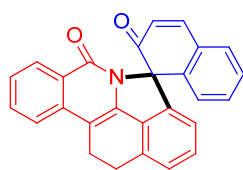

**3sa**

**11,12-Dihydro-2'*H*,6*H*-spiro[isoindolo[7,1,2-*cde*]phenanthridine-4,1'-naphthalene]-2',6-dione (3sa):** Dichloromethane/ethyl acetate (60:1) as eluent; yellow solid (38 mg, 49%), mp  $>300$  °C.  $^1\text{H}$  NMR ( $\text{CDCl}_3$ , 400 MHz)  $\delta$  8.40 (dd,  $J = 8.0, 0.4$  Hz, 1H), 7.74 (d,  $J = 10.4$  Hz, 1H), 7.69 (dd,  $J = 7.2, 1.2$  Hz, 1H), 7.65 (d,  $J = 7.2$  Hz, 1H), 7.47 (d,  $J = 7.2$  Hz, 1H), 7.44-7.40 (m, 1H), 7.31 (td,  $J = 7.2, 1.2$  Hz, 1H), 7.21-7.11 (m, 3H), 6.89 (t,  $J = 6.8$  Hz, 2H), 6.44 (d,  $J = 10.0$  Hz, 1H), 3.32-3.21 (m, 4H);  $^{13}\text{C}$  NMR ( $\text{CDCl}_3$ , 100 MHz)  $\delta$  192.3, 159.3, 146.5, 139.4, 138.9, 138.4, 137.9, 133.5, 132.4, 130.85, 130.76, 130.5, 130.1, 129.24, 129.21, 128.6, 127.7, 127.2, 125.7, 125.6, 125.0, 122.1, 119.3, 103.4, 79.8, 25.5, 21.5. HRMS (ESI) calcd for  $\text{C}_{27}\text{H}_{17}\text{NNaO}_2$  [ $\text{M} + \text{Na}$ ] $^+$  410.1151, found 410.1147.

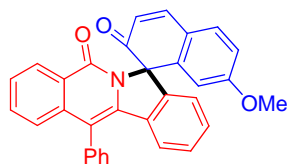

**3ab**

**7'-Methoxy-12-phenyl-2'*H*,5*H*-spiro[isindolo[2,1-*b*]isoquinoline-7,1'-naphthalene]-2',5-dione (3ab):** Dichloromethane/ethyl acetate (30:1) as eluent; pink solid (82 mg, 88%), mp >300 °C. <sup>1</sup>H NMR (CDCl<sub>3</sub>, 600 MHz) δ 8.38 (d, *J* = 7.8 Hz, 1H), 7.71 (d, *J* = 9.6 Hz, 1H), 7.64-7.53 (m, 6H), 7.46-7.43 (m, 2H), 7.28 (d, *J* = 7.8 Hz, 1H), 7.13 (t, *J* = 7.8 Hz, 1H), 7.07 (d, *J* = 7.2 Hz, 1H), 7.03 (t, *J* = 7.2 Hz, 1H), 6.81 (dd, *J* = 8.4, 2.4 Hz, 1H), 6.46 (d, *J* = 8.4 Hz, 1H), 6.39 (d, *J* = 2.4 Hz, 1H), 6.36 (d, *J* = 10.2 Hz, 1H), 3.65 (s, 3H); <sup>13</sup>C NMR (CDCl<sub>3</sub>, 150 MHz) δ 192.7, 161.8, 159.3, 146.3, 142.7, 142.5, 139.2, 138.9, 134.9, 133.3, 132.4, 131.9, 131.4, 131.1, 129.7, 129.6, 129.4, 128.8, 128.6, 127.9, 126.6, 125.6, 125.5, 124.9, 122.9, 122.7, 121.6, 114.5, 112.7, 112.0, 76.2, 55.3. HRMS (ESI) calcd for C<sub>32</sub>H<sub>21</sub>NNaO<sub>3</sub> [M + Na]<sup>+</sup> 490.1414, found 490.1399.

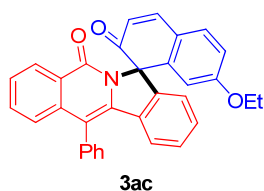

**7'-Ethoxy-12-phenyl-2'*H*,5*H*-spiro[isindolo[2,1-*b*]isoquinoline-7,1'-naphthalene]-2',5-dione (3ac):** Dichloromethane/ethyl acetate (30:1) as eluent; pink solid (95 mg, 98%), mp 183-184 °C. <sup>1</sup>H NMR (CDCl<sub>3</sub>, 600 MHz) δ 8.39 (dd, *J* = 7.8, 1.2 Hz, 1H), 7.71 (d, *J* = 10.2 Hz, 1H), 7.65-7.55 (m, 6H), 7.46-7.42 (m, 2H), 7.28 (d, *J* = 8.4 Hz, 1H), 7.13 (t, *J* = 7.8 Hz, 1H), 7.06 (d, *J* = 7.2 Hz, 1H), 7.03 (td, *J* = 8.4, 1.2 Hz, 1H), 6.79 (dd, *J* = 8.4, 2.4 Hz, 1H), 6.45 (d, *J* = 8.4 Hz, 1H), 6.39 (d, *J* = 2.4 Hz, 1H), 6.36 (d, *J* = 10.2 Hz, 1H), 3.92-3.86 (m, 2H), 1.28 (t, *J* = 7.2 Hz, 3H); <sup>13</sup>C NMR (CDCl<sub>3</sub>, 150 MHz) δ 192.8, 161.2, 159.3, 146.4, 142.6, 142.5, 139.2, 138.9, 134.9, 133.4, 132.4, 131.9, 131.4, 131.2, 129.7, 129.6, 129.4, 128.8, 128.6, 127.9, 126.5, 125.6, 125.5, 124.9, 122.7, 122.5, 121.6, 114.5, 113.2, 112.3, 76.3, 63.6, 14.6. HRMS (ESI) calcd for C<sub>33</sub>H<sub>23</sub>NNaO<sub>3</sub> [M + Na]<sup>+</sup> 504.1570, found 504.1549.

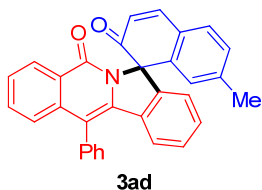

**7'-Methyl-12-phenyl-2'*H*,5*H*-spiro[isoindolo[2,1-*b*]isoquinoline-7,1'-naphthalene]-2',5-di**

**one (3ad):** Dichloromethane/ethyl acetate (30:1) as eluent; yellow solid (44 mg, 49%),

mp >300 °C. <sup>1</sup>H NMR (CDCl<sub>3</sub>, 400 MHz) δ 8.39 (dd, *J* = 8.0, 0.8 Hz, 1H), 7.74 (d, *J* = 9.6 Hz,

1H), 7.66-7.55 (m, 6H), 7.46 (td, *J* = 8.0, 1.2 Hz, 1H), 7.38 (d, *J* = 8.0 Hz, 1H), 7.30 (d, *J* =

8.0 Hz, 1H), 7.16-7.10 (m, 2H), 7.06-7.02 (m, 2H), 6.61 (s, 1H), 6.49-6.47 (m, 1H), 6.43 (d, *J*

= 9.6 Hz, 1H), 2.16 (s, 3H); <sup>13</sup>C NMR (CDCl<sub>3</sub>, 100 MHz) δ 193.0, 159.3, 146.5, 142.5, 141.5,

140.3, 139.2, 139.0, 134.9, 133.4, 132.4, 131.4, 131.1, 130.2, 129.72, 129.66, 129.4, 129.3,

128.8, 128.6, 128.0, 127.0, 126.5, 125.71, 125.67, 125.5, 124.9, 124.2, 121.6, 114.4, 76.3,

21.7. HRMS (ESI) calcd for C<sub>32</sub>H<sub>21</sub>NNaO<sub>2</sub> [M + Na]<sup>+</sup> 474.1464, found 474.1456.

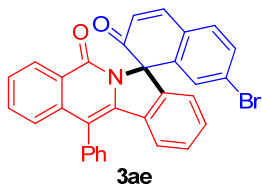

**7'-Bromo-12-phenyl-2'*H*,5*H*-spiro[isoindolo[2,1-*b*]isoquinoline-7,1'-naphthalene]-2',5-di**

**one (3ae):** Dichloromethane/ethyl acetate (45:1) as eluent; brown solid (37 mg, 36%),

mp >300 °C. <sup>1</sup>H NMR (CDCl<sub>3</sub>, 400 MHz) δ 8.38 (d, *J* = 8.0 Hz, 1H), 7.71 (d, *J* = 10.0 Hz, 1H),

7.68-7.58 (m, 5H), 7.54 (d, *J* = 6.8 Hz, 1H), 7.50-7.44 (m, 2H), 7.36 (d, *J* = 8.0 Hz, 1H), 7.31

(d, *J* = 8.4 Hz, 1H), 7.16 (t, *J* = 7.6 Hz, 1H), 7.07 (t, *J* = 7.6 Hz, 1H), 7.02 (d, *J* = 7.6 Hz, 1H),

6.95 (d, *J* = 1.2 Hz, 1H), 6.52-6.48 (m, 2H); <sup>13</sup>C NMR (CDCl<sub>3</sub>, 100 MHz) δ 192.0, 159.4,

145.2, 142.3, 141.6, 139.2, 138.6, 134.7, 133.5, 132.6, 131.8, 131.31, 131.28, 131.2, 129.8,

129.7, 129.4, 129.2, 128.7, 128.5, 128.3, 127.9, 126.8, 125.69, 125.66, 125.6, 125.5, 125.1, 121.6, 114.9, 75.7. HRMS (ESI) calcd for C<sub>31</sub>H<sub>18</sub>BrNNaO<sub>2</sub> [M + Na]<sup>+</sup> 538.0413, found 538.0416.

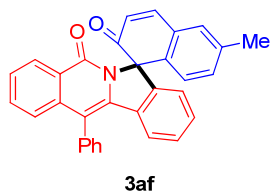

**6'-Methyl-12-phenyl-2'*H*,5*H*-spiro[isoindolo[2,1-*b*]isoquinoline-7,1'-naphthalene]-2',5-dione (3af):** Dichloromethane/ethyl acetate (30:1) as eluent; white solid (51 mg, 56%), mp 198-199 °C. <sup>1</sup>H NMR (CDCl<sub>3</sub>, 600 MHz) δ 8.38 (d, *J* = 7.8 Hz, 1H), 7.72 (d, *J* = 10.2 Hz, 1H), 7.64-7.53 (m, 6H), 7.43 (t, *J* = 7.8 Hz, 1H), 7.29 (s, 1H), 7.28 (d, *J* = 7.8 Hz, 1H), 7.13 (t, *J* = 7.8 Hz, 1H), 7.04-6.99 (m, 3H), 6.73 (d, *J* = 7.8 Hz, 1H), 6.49-6.46 (m, 2H), 2.32 (s, 3H); <sup>13</sup>C NMR (CDCl<sub>3</sub>, 150 MHz) δ 193.2, 159.3, 146.5, 142.7, 139.1, 138.9, 138.2, 137.4, 135.0, 133.5, 132.4, 131.7, 131.4, 131.1, 130.8, 129.8, 129.7, 129.4, 128.8, 128.6, 127.9, 126.5, 125.6, 125.5, 125.3, 125.1, 124.9, 121.6, 114.5, 76.0, 21.0 (one <sup>13</sup>C signal was not observed). HRMS (ESI) calcd for C<sub>32</sub>H<sub>21</sub>NNaO<sub>2</sub> [M + Na]<sup>+</sup> 474.1464, found 474.1457.

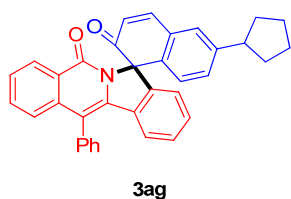

**6'-Cyclopentyl-12-phenyl-2'*H*,5*H*-spiro[isoindolo[2,1-*b*]isoquinoline-7,1'-naphthalene]-2',5-dione (3ag):** Dichloromethane/ethyl acetate (30:1) as eluent; white solid (63 mg, 63%), mp 272-273 °C. <sup>1</sup>H NMR (CDCl<sub>3</sub>, 600 MHz) δ 8.38 (d, *J* = 8.4 Hz, 1H), 7.73 (d, *J* = 10.2 Hz, 1H), 7.64-7.53 (m, 6H), 7.44 (t, *J* = 7.2 Hz, 1H), 7.33 (d, *J* = 1.2 Hz, 1H), 7.28 (d, *J* = 8.4 Hz, 1H),

7.13 (t,  $J = 7.2$  Hz, 1H), 7.06-7.01 (m, 3H), 6.74 (d,  $J = 7.8$  Hz, 1H), 6.48 (d,  $J = 10.2$  Hz, 1H), 6.46 (d,  $J = 7.8$  Hz, 1H), 2.98-2.92 (m, 1H), 2.06-2.02 (m, 2H), 1.81-1.75 (m, 2H), 1.70-1.63 (m, 2H), 1.58-1.51 (m, 2H);  $^{13}\text{C}$  NMR ( $\text{CDCl}_3$ , 150 MHz)  $\delta$  193.2, 159.3, 146.8, 146.7, 142.7, 139.1, 139.0, 137.6, 135.0, 133.4, 132.4, 131.4, 131.1, 129.9, 129.7, 129.6, 129.4, 129.3, 129.0, 128.7, 128.6, 127.9, 126.5, 125.6, 125.5, 125.1, 125.0, 124.9, 121.7, 114.5, 76.0, 45.4, 34.40, 34.35, 25.4. HRMS (ESI) calcd for  $\text{C}_{36}\text{H}_{27}\text{NNaO}_2$   $[\text{M} + \text{Na}]^+$  528.1934, found 528.1904.

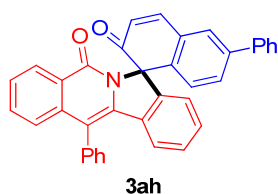

**6',12-Diphenyl-2'H,5H-spiro[isoindolo[2,1-*b*]isoquinoline-7,1'-naphthalene]-2',5-dione**

**(3ah):** Dichloromethane/ethyl acetate (45:1) as eluent; grey solid (51 mg, 49%), mp >300 °C.  $^1\text{H}$  NMR ( $\text{CDCl}_3$ , 600 MHz)  $\delta$  8.39 (d,  $J = 7.8$  Hz, 1H), 7.83 (d,  $J = 9.6$  Hz, 1H), 7.69 (s, 1H), 7.66-7.56 (m, 6H), 7.53 (d,  $J = 7.2$  Hz, 2H), 7.47-7.39 (m, 4H), 7.36 (t,  $J = 7.2$  Hz, 1H), 7.30 (d,  $J = 8.4$  Hz, 1H), 7.16 (t,  $J = 7.8$  Hz, 1H), 7.10 (d,  $J = 7.8$  Hz, 1H), 7.06 (t,  $J = 7.8$  Hz, 1H), 6.92 (d,  $J = 7.8$  Hz, 1H), 6.55 (d,  $J = 10.2$  Hz, 1H), 6.49 (d,  $J = 8.4$  Hz, 1H);  $^{13}\text{C}$  NMR ( $\text{CDCl}_3$ , 150 MHz)  $\delta$  192.9, 159.3, 146.3, 142.4, 141.6, 139.9, 139.2, 139.1, 138.9, 134.9, 133.5, 132.5, 131.4, 131.1, 129.9, 129.8, 129.7, 129.6, 129.4, 128.93, 128.86, 128.7, 127.9, 127.8, 127.1, 126.7, 125.71, 125.68, 125.6, 125.0, 121.7, 114.6, 76.0. HRMS (ESI) calcd for  $\text{C}_{37}\text{H}_{23}\text{NNaO}_2$   $[\text{M} + \text{Na}]^+$  536.1621, found 536.1603.

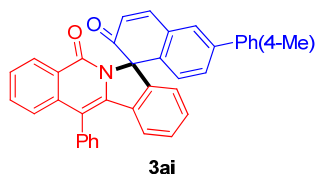

**12-Phenyl-6'-(*p*-tolyl)-2'*H*,5*H*-spiro[isoindolo[2,1-*b*]isoquinoline-7,1'-naphthalene]-2',5-dione (3ai):** Dichloromethane/ethyl acetate (30:1) as eluent; yellow solid (63 mg, 60%), mp >300 °C. <sup>1</sup>H NMR (CDCl<sub>3</sub>, 400 MHz) δ 8.39 (dd, *J* = 8.0, 0.8 Hz, 1H), 7.81 (d, *J* = 10.0 Hz, 1H), 7.66-7.54 (m, 7H), 7.46-7.41 (m, 3H), 7.37 (dd, *J* = 8.0, 1.6 Hz, 1H), 7.29 (d, *J* = 8.0 Hz, 1H), 7.23 (d, *J* = 8.0 Hz, 2H), 7.15 (td, *J* = 8.0, 0.8 Hz, 1H), 7.10-7.02 (m, 2H), 6.89 (d, *J* = 8.0 Hz, 1H), 6.53 (d, *J* = 10.0 Hz, 1H), 6.48 (d, *J* = 7.6 Hz, 1H), 2.37 (s, 3H); <sup>13</sup>C NMR (CDCl<sub>3</sub>, 100 MHz) δ 193.0, 159.3, 146.5, 142.5, 141.5, 139.2, 138.9, 138.8, 137.7, 137.0, 134.9, 133.5, 132.5, 131.4, 131.1, 129.9, 129.8, 129.7, 129.43, 129.40, 128.9, 128.67, 128.66, 127.9, 126.9, 126.6, 125.7, 125.61, 125.58, 125.0, 121.7, 114.6, 76.0, 21.2. HRMS (ESI) calcd for C<sub>38</sub>H<sub>25</sub>NNaO<sub>2</sub> [M + Na]<sup>+</sup> 550.1777, found 550.1756.

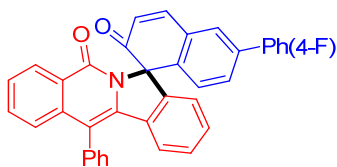

**3aj**

**6'-(4-Fluorophenyl)-12-phenyl-2'*H*,5*H*-spiro[isoindolo[2,1-*b*]isoquinoline-7,1'-naphthalene]-2',5-dione (3aj):** Dichloromethane/ethyl acetate (30:1) as eluent; grey solid (54 mg, 51%), mp >300 °C. <sup>1</sup>H NMR (CDCl<sub>3</sub>, 600 MHz) δ 8.39 (d, *J* = 7.8 Hz, 1H), 7.82 (d, *J* = 10.2 Hz, 1H), 7.66-7.55 (m, 7H), 7.50-7.45 (m, 3H), 7.34 (dd, *J* = 7.8, 1.8 Hz, 1H), 7.30 (d, *J* = 7.8 Hz, 1H), 7.16 (t, *J* = 7.2 Hz, 1H), 7.13-7.05 (m, 4H), 6.91 (d, *J* = 7.8 Hz, 1H), 6.55 (d, *J* = 10.2 Hz, 1H), 6.49 (d, *J* = 8.4 Hz, 1H); <sup>13</sup>C NMR (CDCl<sub>3</sub>, 150 MHz) δ 192.8, 162.8 (d, *J* = 246.2 Hz, 1C), 159.3, 146.1, 142.3, 140.6, 139.2, 138.8, 136.0 (d, *J* = 3.3 Hz, 1C), 134.8, 133.5, 132.5, 131.4, 131.1, 129.9, 129.8, 129.7, 129.41, 129.40, 129.0, 128.75, 128.70, 128.67, 127.9, 126.7, 125.8 (d, *J* = 7.7 Hz, 2C), 125.60, 125.57, 125.0, 121.7, 115.9 (d, *J* = 20.7 Hz, 2C), 114.7, 75.9. <sup>19</sup>F

NMR (CDCl<sub>3</sub>, 376 MHz)  $\delta$  -114.63– -114.70 (m). HRMS (ESI) calcd for C<sub>37</sub>H<sub>22</sub>FNNaO<sub>2</sub> [M + Na]<sup>+</sup> 554.1527, found 554.1500.

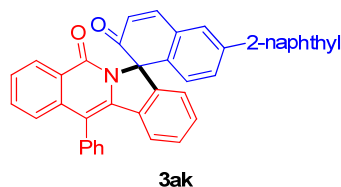

**6'-(Naphthalen-2-yl)-12-phenyl-2'*H*,5*H*-spiro[isoindolo[2,1-*b*]isoquinoline-7,1'-naphthalene]-2',5-dione (3ak):** Dichloromethane/ethyl acetate (45:1) as eluent; white solid (83 mg, 73%), mp >300 °C. <sup>1</sup>H NMR (CDCl<sub>3</sub>, 400 MHz)  $\delta$  8.41 (d, *J* = 8.0 Hz, 1H), 7.97 (s, 1H), 7.90-7.84 (m, 4H), 7.80 (s, 1H), 7.66-7.56 (m, 7H), 7.51-7.43 (m, 4H), 7.30 (d, *J* = 8.4 Hz, 1H), 7.18-7.10 (m, 2H), 7.06 (t, *J* = 7.6 Hz, 1H), 6.95 (d, *J* = 8.4 Hz, 1H), 6.56 (d, *J* = 10.0 Hz, 1H), 6.50 (d, *J* = 8.0 Hz, 1H); <sup>13</sup>C NMR (CDCl<sub>3</sub>, 100 MHz)  $\delta$  192.9, 159.4, 146.4, 142.4, 141.5, 139.20, 139.18, 138.9, 137.2, 134.9, 133.6, 133.5, 132.8, 132.5, 131.4, 131.1, 130.0, 129.9, 129.8, 129.7, 129.4, 129.1, 129.0, 128.70, 128.67, 128.3, 127.9, 127.7, 126.7, 126.5, 126.3, 126.0, 125.79, 125.76, 125.6, 125.2, 125.0, 121.7, 114.7, 76.0 (one <sup>13</sup>C signal was not observed). HRMS (ESI) calcd for C<sub>41</sub>H<sub>25</sub>NNaO<sub>2</sub> [M + Na]<sup>+</sup> 586.1777, found 586.1739.

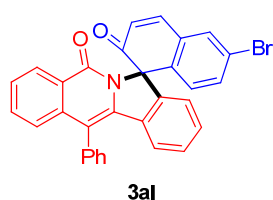

**6'-Bromo-12-phenyl-2'*H*,5*H*-spiro[isoindolo[2,1-*b*]isoquinoline-7,1'-naphthalene]-2',5-dione (3al):** Dichloromethane/ethyl acetate (30:1) as eluent; white solid (44 mg, 43%), mp 190-191 °C. <sup>1</sup>H NMR (CDCl<sub>3</sub>, 600 MHz)  $\delta$  8.36 (d, *J* = 7.2 Hz, 1H), 7.68 (d, *J* = 10.2 Hz, 1H), 7.64-7.57 (m, 5H), 7.55-7.53 (m, 2H), 7.46 (t, *J* = 7.2 Hz, 1H), 7.31-7.28 (m, 2H), 7.15 (t, *J* =



7.8 Hz, 1H), 7.06 (t,  $J = 7.2$  Hz, 1H), 7.03 (d,  $J = 7.8$  Hz, 1H), 6.72 (d,  $J = 8.4$  Hz, 1H), 6.53 (d,  $J = 10.2$  Hz, 1H), 6.47 (d,  $J = 7.8$  Hz, 1H);  $^{13}\text{C}$  NMR ( $\text{CDCl}_3$ , 150 MHz)  $\delta$  192.3, 159.3, 144.6, 141.8, 139.3, 139.1, 138.6, 134.7, 133.6, 133.5, 132.6, 131.3, 131.0, 129.9, 129.7, 129.4, 129.1, 128.7, 127.9, 126.9, 126.8, 126.5, 125.6, 125.5, 125.0, 122.2, 121.6, 114.8, 75.7. HRMS (ESI) calcd for  $\text{C}_{31}\text{H}_{18}\text{BrNNaO}_2$   $[\text{M} + \text{Na}]^+$  538.0413, found 538.0407.

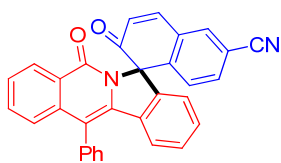

3am

**2',5-Dioxo-12-phenyl-2'H,5H-spiro[isoindolo[2,1-b]isoquinoline-7,1'-naphthalene]-6'-carbonitrile (3am):** Dichloromethane/ethyl acetate (30:1) as eluent; grey solid (38 mg, 41%), mp  $>300$  °C.  $^1\text{H}$  NMR ( $\text{CDCl}_3$ , 400 MHz)  $\delta$  8.35 (d,  $J = 7.6$  Hz, 1H), 7.80 (d,  $J = 1.2$  Hz, 1H), 7.75 (d,  $J = 10.0$  Hz, 1H), 7.67-7.59 (m, 4H), 7.56-7.53 (m, 2H), 7.50-7.46 (m, 2H), 7.30 (d,  $J = 8.4$  Hz, 1H), 7.17 (t,  $J = 7.2$  Hz, 1H), 7.09 (t,  $J = 7.2$  Hz, 1H), 7.02 (d,  $J = 8.0$  Hz, 1H), 6.98 (d,  $J = 8.0$  Hz, 1H), 6.62 (d,  $J = 10.0$  Hz, 1H), 6.50 (d,  $J = 8.0$  Hz, 1H);  $^{13}\text{C}$  NMR ( $\text{CDCl}_3$ , 100 MHz)  $\delta$  191.4, 159.3, 145.2, 143.7, 140.9, 139.1, 138.3, 134.5, 133.8, 133.7, 133.1, 132.8, 131.2, 130.9, 130.6, 130.0, 129.8, 129.5, 128.8, 127.8, 127.3, 127.0, 126.2, 125.8, 125.3, 125.2, 121.5, 117.7, 115.2, 112.7, 75.7 (one  $^{13}\text{C}$  signal was not observed). HRMS (ESI) calcd for  $\text{C}_{32}\text{H}_{18}\text{N}_2\text{NaO}_2$   $[\text{M} + \text{Na}]^+$  485.1260, found 485.1233.

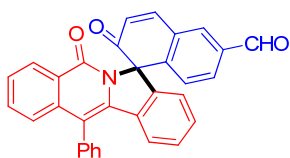

3an

**2',5-Dioxo-12-phenyl-2'H,5H-spiro[isoidolo[2,1-b]isoquinoline-7,1'-naphthalene]-6'-carbaldehyde (3an):** Dichloromethane/ethyl acetate (30:1) as eluent; white solid (35 mg, 38%), mp >300 °C. <sup>1</sup>H NMR (CDCl<sub>3</sub>, 600 MHz) δ 10.00 (s, 1H), 8.36 (d, *J* = 7.8 Hz, 1H), 8.02 (d, *J* = 1.2 Hz, 1H), 7.85 (d, *J* = 10.2 Hz, 1H), 7.71 (dd, *J* = 7.8, 1.2 Hz, 1H), 7.66-7.59 (m, 4H), 7.57-7.55 (m, 2H), 7.47 (t, *J* = 7.2 Hz, 1H), 7.31 (d, *J* = 8.4 Hz, 1H), 7.16 (t, *J* = 7.2 Hz, 1H), 7.08 (t, *J* = 7.2 Hz, 1H), 7.05 (d, *J* = 3.6 Hz, 1H), 7.04 (d, *J* = 3.6 Hz, 1H), 6.61 (d, *J* = 10.2 Hz, 1H), 6.50 (d, *J* = 7.8 Hz, 1H); <sup>13</sup>C NMR (CDCl<sub>3</sub>, 150 MHz) δ 191.8, 190.8, 159.3, 146.5, 144.9, 141.2, 139.1, 138.5, 136.3, 134.6, 133.6, 132.7, 131.7, 131.3, 131.0, 130.7, 130.3, 129.9, 129.7, 129.4, 129.3, 128.7, 127.8, 126.9, 126.6, 126.0, 125.7, 125.4, 125.1, 121.5, 115.0, 76.0. HRMS (ESI) calcd for C<sub>32</sub>H<sub>19</sub>NNaO<sub>3</sub> [M + Na]<sup>+</sup> 488.1257, found 488.1244.

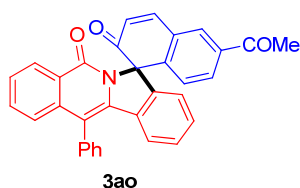

**6'-Acetyl-12-phenyl-2'H,5H-spiro[isoidolo[2,1-b]isoquinoline-7,1'-naphthalene]-2',5-dione (3ao):** Dichloromethane/ethyl acetate (30:1) as eluent; white solid (65 mg, 68%), mp >300 °C. <sup>1</sup>H NMR (CDCl<sub>3</sub>, 400 MHz) δ 8.36 (dd, *J* = 8.0, 0.8 Hz, 1H), 8.09 (d, *J* = 1.2 Hz, 1H), 7.84 (d, *J* = 10.0 Hz, 1H), 7.77 (dd, *J* = 8.0, 1.6 Hz, 1H), 7.67-7.54 (m, 6H), 7.47 (td, *J* = 8.0, 0.8 Hz, 1H), 7.30 (d, *J* = 8.0 Hz, 1H), 7.15 (td, *J* = 7.6, 1.2 Hz, 1H), 7.09-7.03 (m, 2H), 6.96 (d, *J* = 8.0 Hz, 1H), 6.58 (d, *J* = 10.0 Hz, 1H), 6.49 (d, *J* = 8.0 Hz, 1H), 2.58 (s, 3H); <sup>13</sup>C NMR (CDCl<sub>3</sub>, 100 MHz) δ 196.7, 192.1, 159.3, 145.4, 145.1, 141.5, 139.1, 138.6, 137.1, 134.7, 133.6, 132.6, 131.3, 131.0, 130.5, 129.9, 129.84, 129.77, 129.7, 129.4, 129.2, 128.7, 127.9, 126.8, 126.3, 125.7, 125.6, 125.4, 125.1, 121.5, 114.9, 76.0, 26.6. HRMS (ESI) calcd for C<sub>33</sub>H<sub>21</sub>NNaO<sub>3</sub> [M + Na]<sup>+</sup> 502.1414, found 502.1402.

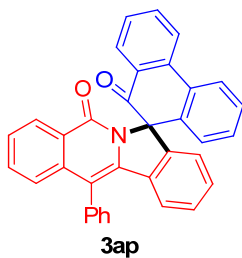

**12-Phenyl-5H,10'H-spiro[isoindolo[2,1-b]isoquinoline-7,9'-phenanthrene]-5,10'-dione**

**(3ap):** Dichloromethane/ethyl acetate (100:1) as eluent; white solid (46 mg, 47%), mp >300 °C. <sup>1</sup>H NMR (CDCl<sub>3</sub>, 400 MHz) δ 8.39 (d, *J* = 7.2 Hz, 1H), 8.22 (d, *J* = 8.0 Hz, 1H), 8.16-8.13 (m, 2H), 7.80 (td, *J* = 8.4, 0.8 Hz, 1H), 7.66-7.55 (m, 6H), 7.48 (d, *J* = 7.6 Hz, 1H), 7.44 (d, *J* = 6.8 Hz, 1H), 7.39 (td, *J* = 8.0, 0.8 Hz, 1H), 7.30 (d, *J* = 8.0 Hz, 1H), 7.17 (t, *J* = 7.6 Hz, 1H), 7.04-6.98 (m, 2H), 6.92 (d, *J* = 7.6 Hz, 1H), 6.84-6.82 (m, 1H), 6.47-6.45 (m, 1H); <sup>13</sup>C NMR (CDCl<sub>3</sub>, 100 MHz) δ 191.2, 159.4, 142.6, 139.2, 138.9, 137.9, 137.3, 135.5, 135.0, 133.3, 132.4, 131.4, 131.2, 129.8, 129.69, 129.67, 129.45, 129.43, 129.38, 128.92, 128.85, 128.6, 128.5, 128.0, 126.6, 125.7, 125.5, 125.3, 124.9, 124.5, 123.6, 121.9, 114.7, 76.9 (one <sup>13</sup>C signal was not observed). HRMS (ESI) calcd for C<sub>35</sub>H<sub>21</sub>NNaO<sub>2</sub> [M + Na]<sup>+</sup> 510.1464, found 510.1462.

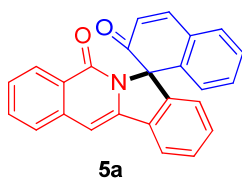

**2'H,5H-spiro[isoindolo[2,1-b]isoquinoline-7,1'-naphthalene]-2',5-dione (5a):**

Dichloromethane/ethyl acetate (30:1) as eluent; brown solid (50 mg, 69%), mp >300 °C. <sup>1</sup>H NMR (CDCl<sub>3</sub>, 600 MHz) δ 8.30 (d, *J* = 8.4 Hz, 1H), 7.83 (d, *J* = 7.2 Hz, 1H), 7.76 (d, *J* = 10.2 Hz, 1H), 7.69-7.65 (m, 2H), 7.48 (d, *J* = 7.8 Hz, 1H), 7.44 (d, *J* = 6.6 Hz, 1H), 7.42 (d, *J* = 7.2 Hz, 1H), 7.30 (t, *J* = 7.2 Hz, 1H), 7.28 (d, *J* = 7.2 Hz, 1H), 7.16 (t, *J* = 7.8 Hz, 1H),

7.10-7.09 (m, 2H), 6.77 (d,  $J = 7.8$  Hz, 1H), 6.48 (d,  $J = 10.2$  Hz, 1H);  $^{13}\text{C}$  NMR ( $\text{CDCl}_3$ , 150 MHz)  $\delta$  192.7, 159.6, 146.5, 142.6, 142.2, 139.9, 138.2, 133.2, 132.6, 130.9, 130.4, 130.1, 129.5, 129.3, 128.5, 128.0, 126.7, 126.6, 126.1, 125.2, 122.0, 121.9, 98.5, 76.6 (one  $^{13}\text{C}$  signal was not observed). HRMS (ESI) calcd for  $\text{C}_{25}\text{H}_{15}\text{NNaO}_2$   $[\text{M} + \text{Na}]^+$  384.0995, found 384.0982.

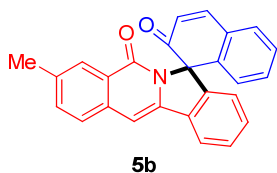

**3-Methyl-2'H,5H-spiro[isoindolo[2,1-*b*]isoquinoline-7,1'-naphthalene]-2',5-dione (5b):**

Dichloromethane/ethyl acetate (45:1) as eluent; brown solid (41 mg, 54%), mp  $>300$  °C.  $^1\text{H}$  NMR ( $\text{CDCl}_3$ , 600 MHz)  $\delta$  8.11 (s, 1H), 7.80 (d,  $J = 7.8$  Hz, 1H), 7.75 (d,  $J = 9.6$  Hz, 1H), 7.59 (d,  $J = 7.8$  Hz, 1H), 7.50-7.47 (m, 2H), 7.41 (t,  $J = 7.8$  Hz, 1H), 7.29 (t,  $J = 7.2$  Hz, 1H), 7.25 (t,  $J = 7.2$  Hz, 1H), 7.16-7.14 (m, 1H), 7.09 (d,  $J = 7.8$  Hz, 1H), 7.07 (s, 1H), 6.75 (d,  $J = 7.8$  Hz, 1H), 6.48 (d,  $J = 10.2$  Hz, 1H), 2.44 (s, 3H);  $^{13}\text{C}$  NMR ( $\text{CDCl}_3$ , 150 MHz)  $\delta$  192.8, 159.5, 146.4, 142.1, 141.7, 140.1, 136.8, 135.8, 134.1, 133.3, 130.9, 130.10, 130.07, 129.5, 129.3, 128.4, 127.7, 126.7, 126.1, 125.2, 121.9, 121.8, 98.5, 76.5, 21.5 (one  $^{13}\text{C}$  signal was not observed). HRMS (ESI) calcd for  $\text{C}_{26}\text{H}_{17}\text{NNaO}_2$   $[\text{M} + \text{Na}]^+$  398.1151, found 398.1136.

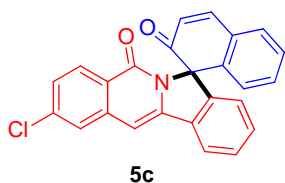

**2-Chloro-2'H,5H-spiro[isoindolo[2,1-*b*]isoquinoline-7,1'-naphthalene]-2',5-dione (5c):**

Dichloromethane/ethyl acetate (45:1) as eluent; brown solid (52 mg, 65%), mp  $>300$  °C.  $^1\text{H}$  NMR ( $\text{CDCl}_3$ , 400 MHz)  $\delta$  8.21 (d,  $J = 8.8$  Hz, 1H), 7.80 (d,  $J = 8.0$  Hz, 1H), 7.77 (d,  $J =$

10.0 Hz, 1H), 7.63 (d,  $J = 2.0$  Hz, 1H), 7.49 (d,  $J = 7.2$  Hz, 1H), 7.41 (td,  $J = 7.6, 0.8$  Hz, 1H), 7.36 (dd,  $J = 8.8, 2.0$  Hz, 1H), 7.33-7.26 (m, 2H), 7.17 (td,  $J = 7.6, 1.2$  Hz, 1H), 7.10 (d,  $J = 7.6$  Hz, 1H), 7.00 (s, 1H), 6.75 (d,  $J = 8.0$  Hz, 1H), 6.49 (d,  $J = 10.0$  Hz, 1H);  $^{13}\text{C}$  NMR ( $\text{CDCl}_3$ , 100 MHz)  $\delta$  192.5, 159.0, 146.6, 144.0, 142.3, 139.6, 139.5, 139.1, 132.7, 131.0, 130.8, 130.2, 129.7, 129.4, 128.6, 127.0, 125.9, 125.1, 124.4, 122.2, 121.9, 97.4, 77.3 (two  $^{13}\text{C}$  signals were not observed). HRMS (ESI) calcd for  $\text{C}_{25}\text{H}_{14}\text{ClNNaO}_2$  [ $\text{M} + \text{Na}$ ] $^+$  418.0605, found 418.0589.

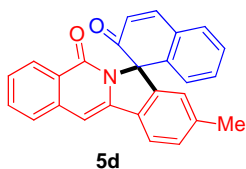

**9-Methyl-2'H,5H-spiro[isoindolo[2,1-b]isoquinoline-7,1'-naphthalene]-2',5-dione (5d):**

Dichloromethane/ethyl acetate (45:1) as eluent; yellow solid (55 mg, 73%), mp  $>300$  °C.  $^1\text{H}$  NMR ( $\text{CDCl}_3$ , 400 MHz)  $\delta$  8.29 (d,  $J = 8.0$  Hz, 1H), 7.75 (d,  $J = 10.0$  Hz, 1H), 7.70 (d,  $J = 8.0$  Hz, 1H), 7.64-7.63 (m, 2H), 7.48 (d,  $J = 7.2$  Hz, 1H), 7.42-7.38 (m, 1H), 7.29 (t,  $J = 7.6$  Hz, 1H), 7.21 (d,  $J = 8.0$  Hz, 1H), 7.16 (t,  $J = 7.6$  Hz, 1H), 7.02 (s, 1H), 6.87 (s, 1H), 6.76 (d,  $J = 7.6$  Hz, 1H), 6.48 (d,  $J = 10.0$  Hz, 1H), 2.27 (s, 3H);  $^{13}\text{C}$  NMR ( $\text{CDCl}_3$ , 100 MHz)  $\delta$  192.9, 159.6, 146.5, 142.8, 142.5, 141.0, 140.1, 138.3, 132.6, 130.9, 130.5, 130.4, 130.1, 129.5, 128.4, 128.0, 126.6, 126.3, 125.9, 125.3, 125.2, 122.2, 121.8, 97.9, 76.4, 21.8. HRMS (ESI) calcd for  $\text{C}_{26}\text{H}_{17}\text{NNaO}_2$  [ $\text{M} + \text{Na}$ ] $^+$  398.1151, found 398.1142.

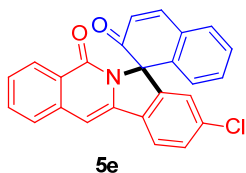

**9-Chloro-2'*H*,5*H*-spiro[isindolo[2,1-*b*]isoquinoline-7,1'-naphthalene]-2',5-dione (5e):**

Dichloromethane/ethyl acetate (45:1) as eluent; yellow solid (58 mg, 73%), mp >300 °C. <sup>1</sup>H NMR (CDCl<sub>3</sub>, 400 MHz) δ 8.30-8.28 (m, 1H), 7.78 (d, *J* = 10.0 Hz, 1H), 7.74 (d, *J* = 8.4 Hz, 1H), 7.67-7.66 (m, 2H), 7.50 (dd, *J* = 7.6, 1.2 Hz, 1H), 7.47-7.43 (m, 1H), 7.37 (dd, *J* = 8.0, 1.6 Hz, 1H), 7.33 (td, *J* = 7.2, 1.2 Hz, 1H), 7.19 (td, *J* = 7.6, 1.2 Hz, 1H), 7.06 (s, 1H), 7.05 (d, *J* = 2.0 Hz, 1H), 6.76 (d, *J* = 7.6 Hz, 1H), 6.49 (d, *J* = 10.0 Hz, 1H); <sup>13</sup>C NMR (CDCl<sub>3</sub>, 100 MHz) δ 192.2, 159.5, 146.7, 143.4, 141.5, 139.2, 138.0, 136.1, 132.8, 131.7, 131.1, 130.4, 129.9, 129.4, 128.8, 128.0, 126.8, 126.1, 125.2, 125.0, 123.1, 122.4, 98.9, 76.1 (one <sup>13</sup>C signal was not observed). HRMS (ESI) calcd for C<sub>25</sub>H<sub>14</sub>ClNNaO<sub>2</sub> [M + Na]<sup>+</sup> 418.0605, found 418.0598.

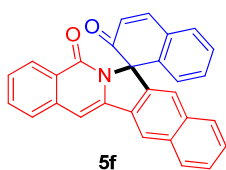

**2'*H*,5*H*-Spiro[benzo[5,6]isindolo[2,1-*b*]isoquinoline-7,1'-naphthalene]-2',5-dione (5f):**

Dichloromethane/ethyl acetate (45:1) as eluent; yellow solid (43 mg, 52%), mp >300 °C. <sup>1</sup>H NMR (CDCl<sub>3</sub>, 400 MHz) δ 8.33-8.31 (m, 2H), 7.92 (d, *J* = 8.0 Hz, 1H), 7.83 (d, *J* = 10.0 Hz, 1H), 7.73-7.66 (m, 3H), 7.54-7.43 (m, 5H), 7.31 (td, *J* = 7.6, 1.2 Hz, 1H), 7.28 (s, 1H), 7.15 (td, *J* = 7.6, 1.2 Hz, 1H), 6.79 (d, *J* = 8.0 Hz, 1H), 6.53 (d, *J* = 10.0 Hz, 1H); <sup>13</sup>C NMR (CDCl<sub>3</sub>, 150 MHz) δ 192.9, 159.7, 146.6, 142.2, 140.9, 139.0, 138.2, 134.2, 133.6, 132.7, 131.1, 130.9, 130.2, 129.3, 128.6, 128.42, 128.35, 128.1, 127.3, 127.1, 126.8, 126.7, 126.3, 125.3, 125.0, 121.4, 121.1, 98.9, 76.0. HRMS (ESI) calcd for C<sub>29</sub>H<sub>17</sub>NNaO<sub>2</sub> [M + Na]<sup>+</sup> 434.1151, found 434.1135.

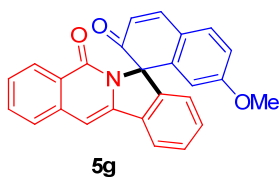

**7'-Methoxy-2'H,5H-spiro[isoindolo[2,1-b]isoquinoline-7,1'-naphthalene]-2',5-dione (5g):**

Dichloromethane/ethyl acetate (45:1) as eluent; brown solid (35 mg, 44%), mp >300 °C. <sup>1</sup>H NMR (CDCl<sub>3</sub>, 400 MHz) δ 8.32 (d, *J* = 8.0 Hz, 1H), 7.82 (d, *J* = 7.6 Hz, 1H), 7.71 (d, *J* = 10.0 Hz, 1H), 7.69-7.67 (m, 2H), 7.46-7.40 (m, 3H), 7.30-7.26 (m, 1H), 7.12 (d, *J* = 7.6 Hz, 1H), 7.09 (s, 1H), 6.80 (dd, *J* = 8.4, 2.8 Hz, 1H), 6.35 (d, *J* = 9.6 Hz, 1H), 6.29 (d, *J* = 2.4 Hz, 1H), 3.61 (s, 3H); <sup>13</sup>C NMR (CDCl<sub>3</sub>, 150 MHz) δ 192.6, 161.8, 159.6, 146.5, 142.6, 142.3, 142.2, 138.2, 133.0, 132.6, 131.9, 130.3, 129.3, 128.1, 126.7, 126.6, 126.1, 122.8, 122.5, 122.0, 121.9, 112.6, 112.3, 98.5, 76.7, 55.3. HRMS (ESI) calcd for C<sub>26</sub>H<sub>17</sub>NNaO<sub>3</sub> [M + Na]<sup>+</sup> 414.1101, found 414.1093.

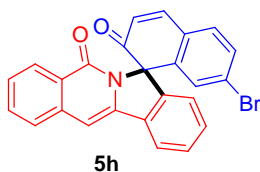

**7'-Bromo-2'H,5H-spiro[isoindolo[2,1-b]isoquinoline-7,1'-naphthalene]-2',5-dione (5h):**

Dichloromethane/ethyl acetate (45:1) as eluent; yellow solid (37 mg, 42%), mp >300 °C. <sup>1</sup>H NMR (CDCl<sub>3</sub>, 400 MHz) δ 8.30 (d, *J* = 8.0 Hz, 1H), 7.84 (d, *J* = 8.0 Hz, 1H), 7.71-7.68 (m, 3H), 7.47-7.42 (m, 3H), 7.33 (d, *J* = 8.4 Hz, 1H), 7.29 (t, *J* = 8.0 Hz, 1H), 7.11 (s, 1H), 7.07 (d, *J* = 8.0 Hz, 1H), 6.87 (d, *J* = 1.2 Hz, 1H), 6.49 (d, *J* = 10.0 Hz, 1H); <sup>13</sup>C NMR (CDCl<sub>3</sub>, 100 MHz) δ 191.8, 159.7, 145.3, 142.3, 141.8, 141.5, 138.2, 133.2, 132.8, 131.8, 131.3, 130.5, 129.6, 128.43, 128.39, 128.0, 126.9, 126.8, 126.0, 125.7, 125.5, 122.2, 121.9, 98.9, 76.0. HRMS (ESI) calcd for C<sub>25</sub>H<sub>14</sub>BrNNaO<sub>2</sub> [M + Na]<sup>+</sup> 462.0100, found 462.0104.

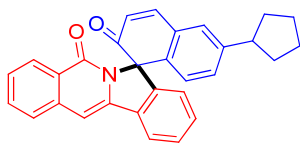

**5i**

**6'-Cyclopentyl-2'*H*,5*H*-spiro[isoindolo[2,1-*b*]isoquinoline-7,1'-naphthalene]-2',5-dione**

**(5i):** Dichloromethane/ethyl acetate (100:1) as eluent; brown solid (30 mg, 34%), mp 164-165 °C. <sup>1</sup>H NMR (CDCl<sub>3</sub>, 400 MHz) δ 8.30 (d, *J* = 8.0 Hz, 1H), 7.81 (d, *J* = 7.6 Hz, 1H), 7.72 (d, *J* = 10.0 Hz, 1H), 7.68-7.63 (m, 2H), 7.44-7.38 (m, 2H), 7.32 (d, *J* = 1.2 Hz, 1H), 7.28-7.25 (m, 1H), 7.10-7.08 (m, 2H), 7.02 (dd, *J* = 8.0, 1.6 Hz, 1H), 6.66 (d, *J* = 8.0 Hz, 1H), 6.46 (d, *J* = 9.6 Hz, 1H), 2.98-2.89 (m, 1H), 2.06-2.01 (m, 2H), 1.83-1.75 (m, 2H), 1.71-1.63 (m, 2H), 1.55-1.48 (m, 2H); <sup>13</sup>C NMR (CDCl<sub>3</sub>, 100 MHz) δ 193.0, 159.6, 147.0, 146.8, 142.7, 142.5, 138.2, 137.0, 133.1, 132.6, 130.3, 129.9, 129.24, 129.20, 129.0, 128.0, 126.7, 126.5, 126.1, 125.1, 125.0, 122.0, 121.9, 98.4, 76.5, 45.4, 34.4, 34.3, 25.4. HRMS (ESI) calcd for C<sub>30</sub>H<sub>23</sub>NNaO<sub>2</sub> [M + Na]<sup>+</sup> 452.1621, found 452.1603.

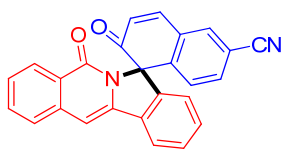

**5j**

**2',5-Dioxo-2'*H*,5*H*-spiro[isoindolo[2,1-*b*]isoquinoline-7,1'-naphthalene]-6'-carbonitrile**

**(5j):** Dichloromethane/ethyl acetate (45:1) as eluent; yellow solid (27 mg, 34%), mp >300 °C. <sup>1</sup>H NMR (CDCl<sub>3</sub>, 400 MHz) δ 8.28 (d, *J* = 8.0 Hz, 1H), 7.85 (d, *J* = 7.6 Hz, 1H), 7.78 (s, 1H), 7.74 (d, *J* = 10.4 Hz, 1H), 7.70 (d, *J* = 3.6 Hz, 2H), 7.49-7.42 (m, 3H), 7.30 (t, *J* = 7.6 Hz, 1H), 7.13 (s, 1H), 7.07 (d, *J* = 8.0 Hz, 1H), 6.89 (d, *J* = 8.0 Hz, 1H), 6.59 (d, *J* = 10.0 Hz, 1H); <sup>13</sup>C NMR (CDCl<sub>3</sub>, 100 MHz) δ 191.2, 159.6, 144.7, 143.8, 142.1, 140.7, 138.1, 133.8, 133.3, 133.1, 133.0, 130.6, 130.5, 129.9, 128.0, 127.2, 126.98, 126.96, 126.2, 125.8, 122.3, 121.8,



117.7, 112.7, 99.1, 76.1. HRMS (ESI) calcd for C<sub>26</sub>H<sub>14</sub>N<sub>2</sub>NaO<sub>2</sub> [M + Na]<sup>+</sup> 409.0947, found 409.0941.

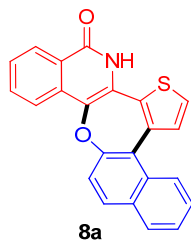

**Naphtho[1',2':6,7]thieno[2',3':4,5]oxepino[3,2-c]isoquinolin-12(13H)-one (8a):** Petroleum ether/ethyl acetate (3:1) as eluent; yellow solid (32 mg, 43%), mp >300 °C. <sup>1</sup>H NMR (DMSO-*d*<sub>6</sub>, 600 MHz) δ 11.75 (s, 1H), 8.43 (d, *J* = 7.8 Hz, 1H), 8.25 (d, *J* = 7.2 Hz, 1H), 8.15 (d, *J* = 8.4 Hz, 1H), 8.08-8.06 (m, 2H), 8.02 (d, *J* = 7.8 Hz, 1H), 7.94-7.91 (m, 1H), 7.84 (d, *J* = 9.0 Hz, 1H), 7.71 (d, *J* = 5.4 Hz, 1H), 7.64-7.60 (m, 2H), 7.56-7.54 (m, 1H); <sup>13</sup>C NMR (DMSO-*d*<sub>6</sub>, 100 MHz) δ 161.4, 158.0, 137.1, 136.6, 133.8, 133.2, 132.6, 132.0, 131.3, 131.2, 130.4, 129.1, 128.2, 128.0, 126.1, 125.8, 125.4, 123.4, 122.0, 121.3 (three <sup>13</sup>C signals were not observed). HRMS (ESI) calcd for C<sub>23</sub>H<sub>13</sub>NNaO<sub>2</sub>S [M + Na]<sup>+</sup> 390.0559, found 390.0546.

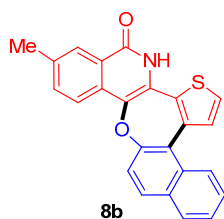

**10-Methylnaphtho[1',2':6,7]thieno[2',3':4,5]oxepino[3,2-c]isoquinolin-12(13H)-one (8b):** Petroleum ether/ethyl acetate (3:1) as eluent; brown solid (25 mg, 33%), mp 257-258 °C. <sup>1</sup>H NMR (DMSO-*d*<sub>6</sub>, 600 MHz) δ 11.66 (s, 1H), 8.32 (d, *J* = 8.4 Hz, 1H), 8.15 (d, *J* = 9.0 Hz, 1H), 8.07-8.05 (m, 3H), 8.02 (d, *J* = 7.8 Hz, 1H), 7.81 (d, *J* = 9.0 Hz, 1H), 7.74 (dd, *J* = 7.8, 1.2 Hz, 1H), 7.70 (d, *J* = 5.4 Hz, 1H), 7.62-7.59 (m, 1H), 7.56-7.53 (m, 1H), 2.49 (s, 3H); <sup>13</sup>C

NMR (DMSO-*d*<sub>6</sub>, 100 MHz)  $\delta$  161.3, 158.0, 137.9, 136.8, 135.1, 132.0, 131.3, 131.1, 130.9, 130.4, 129.1, 128.00, 127.95, 127.6, 126.1, 125.4, 123.4, 122.1, 121.3, 21.5 (four <sup>13</sup>C signals were not observed). HRMS (ESI) calcd for C<sub>24</sub>H<sub>15</sub>NNaO<sub>2</sub>S [M + Na]<sup>+</sup> 404.0716, found 404.0714.

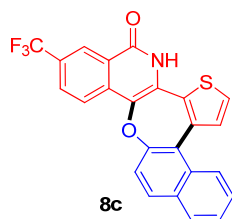

**10-(Trifluoromethyl)naphtho[1',2':6,7]thieno[2',3':4,5]oxepino[3,2-*c*]isoquinolin-12(13*H*)-one (8c):** Petroleum ether/ethyl acetate (5:1) as eluent; yellow solid (26 mg, 30%), mp 267-268 °C. <sup>1</sup>H NMR (DMSO-*d*<sub>6</sub>, 600 MHz)  $\delta$  12.12 (s, 1H), 8.63 (d, *J* = 8.4 Hz, 1H), 8.46 (s, 1H), 8.17-8.13 (m, 3H), 8.09 (d, *J* = 9.0 Hz, 1H), 8.03 (d, *J* = 7.8 Hz, 1H), 7.85 (d, *J* = 9.0 Hz, 1H), 7.73 (d, *J* = 5.4 Hz, 1H), 7.63-7.61 (m, 1H), 7.56 (t, *J* = 7.2 Hz, 1H); <sup>13</sup>C NMR (DMSO-*d*<sub>6</sub>, 150 MHz)  $\delta$  160.8, 157.8, 137.9, 136.0, 132.1, 131.4, 131.3, 130.6, 129.6, 129.2, 129.1, 128.1, 127.7, 127.5, 126.2, 125.4, 125.3, 125.1, 123.6, 123.5, 123.2, 121.1; <sup>19</sup>F NMR (DMSO-*d*<sub>6</sub>, 564 MHz)  $\delta$  -60.99 (s). HRMS (ESI) calcd for C<sub>24</sub>H<sub>12</sub>F<sub>3</sub>NNaO<sub>2</sub>S [M + Na]<sup>+</sup> 458.0433, found 458.0431.

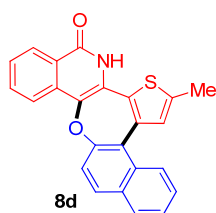

**15-Methylnaphtho[1',2':6,7]thieno[2',3':4,5]oxepino[3,2-*c*]isoquinolin-12(13*H*)-one (8d):** Petroleum ether/ethyl acetate (3:1) as eluent; brown solid (29 mg, 38%), mp 125-126 °C. <sup>1</sup>H NMR (CDCl<sub>3</sub>, 400 MHz)  $\delta$  8.62 (s, 1H), 8.39 (d, *J* = 7.6 Hz, 1H), 8.29 (d, *J* = 8.0 Hz, 1H),

8.21 (d,  $J = 8.4$  Hz, 1H), 7.88-7.81 (m, 3H), 7.58-7.45 (m, 4H), 7.34 (d,  $J = 0.8$  Hz, 1H), 2.70 (d,  $J = 0.8$  Hz, 3H);  $^{13}\text{C}$  NMR ( $\text{CDCl}_3$ , 150 MHz)  $\delta$  161.5, 157.8, 140.8, 137.8, 136.8, 133.7, 133.3, 131.9, 131.6, 130.5, 129.5, 129.3, 128.5, 128.4, 127.3, 127.1, 125.6, 125.5, 125.3, 123.5, 121.4, 120.9, 15.8 (one  $^{13}\text{C}$  signal was not observed). HRMS (ESI) calcd for  $\text{C}_{24}\text{H}_{15}\text{NNaO}_2\text{S}$   $[\text{M} + \text{Na}]^+$  404.0716, found 404.0717.

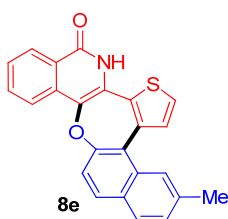

**2-Methylnaphtho[1',2':6,7]thieno[2',3':4,5]oxepino[3,2-c]isoquinolin-12(13H)-one (8e):**

Petroleum ether/ethyl acetate (3:1) as eluent; brown solid (22 mg, 29%), mp 119-120 °C.  $^1\text{H}$  NMR ( $\text{CDCl}_3$ , 400 MHz)  $\delta$  9.94 (s, 1H), 8.43 (d,  $J = 7.6$  Hz, 1H), 8.31 (d,  $J = 8.0$  Hz, 1H), 7.97 (s, 1H), 7.86-7.81 (m, 2H), 7.75 (d,  $J = 8.4$  Hz, 1H), 7.68 (m, 2H), 7.58-7.54 (m, 1H), 7.51 (d,  $J = 8.8$  Hz, 1H), 7.30 (dd,  $J = 8.0, 0.8$  Hz, 1H), 2.49 (s, 3H);  $^{13}\text{C}$  NMR ( $\text{DMSO}-d_6$ , 150 MHz)  $\delta$  161.4, 158.2, 137.5, 137.3, 133.8, 133.2, 131.6, 130.9, 130.4, 130.2, 130.1, 129.0, 128.24, 128.21, 128.0, 124.4, 122.7, 122.0, 120.3, 22.2 (four  $^{13}\text{C}$  signals were not observed). HRMS (ESI) calcd for  $\text{C}_{24}\text{H}_{15}\text{NNaO}_2\text{S}$   $[\text{M} + \text{Na}]^+$  404.0716, found 404.0718.

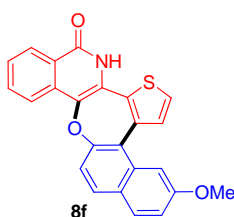

**2-Methoxynaphtho[1',2':6,7]thieno[2',3':4,5]oxepino[3,2-c]isoquinolin-12(13H)-one (8f):**

Petroleum ether/ethyl acetate (2:1) as eluent; brown solid (30 mg, 38%), mp 107-108 °C.  $^1\text{H}$  NMR ( $\text{CDCl}_3$ , 400 MHz)  $\delta$  9.95 (s, 1H), 8.43 (d,  $J = 7.2$  Hz, 1H), 8.32 (d,  $J = 8.0$  Hz, 1H),

7.87-7.82 (m, 1H), 7.79 (d,  $J = 8.8$  Hz, 1H), 7.75 (d,  $J = 8.8$  Hz, 1H), 7.72 (d,  $J = 5.2$  Hz, 1H), 7.68 (d,  $J = 5.2$  Hz, 1H), 7.59-7.53 (m, 2H), 7.44 (d,  $J = 8.8$  Hz, 1H), 7.13 (dd,  $J = 8.8, 2.4$  Hz, 1H), 3.88 (s, 3H);  $^{13}\text{C}$  NMR (DMSO- $d_6$ , 150 MHz)  $\delta$  161.4, 158.9, 158.8, 137.4, 133.8, 133.2, 132.9, 130.9, 130.8, 129.9, 128.4, 128.0, 127.4, 122.4, 122.0, 118.7, 118.3, 104.4, 55.5 (five  $^{13}\text{C}$  signals were not observed). HRMS (ESI) calcd for  $\text{C}_{24}\text{H}_{15}\text{NNaO}_3\text{S}$   $[\text{M} + \text{Na}]^+$  420.0665, found 420.0657.

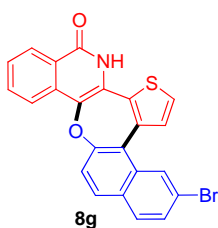

**2-Bromonaphtho[1',2':6,7]thieno[2',3':4,5]oxepino[3,2-c]isoquinolin-12(13H)-one (8g):**

Petroleum ether/ethyl acetate (3:1) as eluent; brown solid (37 mg, 41%), mp 151-152 °C.  $^1\text{H}$  NMR ( $\text{CDCl}_3$ , 600 MHz)  $\delta$  10.27 (s, 1H), 8.44 (d,  $J = 7.8$  Hz, 1H), 8.35 (s, 1H), 8.29 (d,  $J = 8.4$  Hz, 1H), 7.86-7.82 (m, 2H), 7.72-7.71 (m, 2H), 7.63 (d,  $J = 5.4$  Hz, 1H), 7.60-7.56 (m, 2H), 7.54 (dd,  $J = 9.0, 1.8$  Hz, 1H);  $^{13}\text{C}$  NMR (DMSO- $d_6$ , 150 MHz)  $\delta$  161.4, 158.7, 136.3, 133.8, 133.1, 132.6, 131.34, 131.29, 130.5, 130.0, 129.1, 128.8, 128.1, 128.0, 127.3, 122.8, 122.0, 121.7 (five  $^{13}\text{C}$  signals were not observed). HRMS (ESI) calcd for  $\text{C}_{23}\text{H}_{12}\text{BrNNaO}_2\text{S}$   $[\text{M} + \text{Na}]^+$  467.9664, found 467.9662.

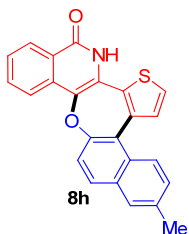

**3-Methylnaphtho[1',2':6,7]thieno[2',3':4,5]oxepino[3,2-c]isoquinolin-12(13*H*)-one (8h):**

Petroleum ether/ethyl acetate (3:1) as eluent; brown solid (36 mg, 47%), mp 145-146 °C. <sup>1</sup>H NMR (CDCl<sub>3</sub>, 400 MHz) δ 10.59 (s, 1H), 8.44 (d, *J* = 8.0 Hz, 1H), 8.31 (d, *J* = 8.0 Hz, 1H), 8.07 (d, *J* = 8.8 Hz, 1H), 7.83 (t, *J* = 8.0 Hz, 1H), 7.75 (d, *J* = 8.8 Hz, 1H), 7.66-7.62 (m, 2H), 7.60 (s, 1H), 7.57-7.52 (m, 2H), 7.31 (d, *J* = 8.0 Hz, 1H), 2.47 (s, 3H); <sup>13</sup>C NMR (CDCl<sub>3</sub>, 100 MHz) δ 162.4, 157.4, 137.8, 137.6, 135.1, 133.8, 133.2, 132.2, 131.9, 130.7, 129.8, 129.4, 128.3, 127.5, 127.4, 126.0, 125.63, 125.58, 125.4, 123.3, 121.5, 120.7, 21.3 (one <sup>13</sup>C signal was not observed). HRMS (ESI) calcd for C<sub>24</sub>H<sub>15</sub>NNaO<sub>2</sub>S [M + Na]<sup>+</sup> 404.0716, found 404.0712.

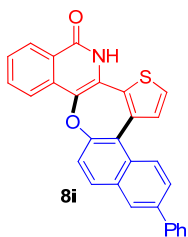

**3-Phenylnaphtho[1',2':6,7]thieno[2',3':4,5]oxepino[3,2-c]isoquinolin-12(13*H*)-one (8i):**

Petroleum ether/ethyl acetate (3:1) as eluent; brown solid (21 mg, 23%), mp 264-265 °C. <sup>1</sup>H NMR (DMSO-*d*<sub>6</sub>, 400 MHz) δ 11.75 (s, 1H), 8.44 (d, *J* = 8.0 Hz, 1H), 8.35 (d, *J* = 1.2 Hz, 1H), 8.23 (t, *J* = 8.4 Hz, 2H), 8.15 (d, *J* = 9.2 Hz, 1H), 8.09 (d, *J* = 5.2 Hz, 1H), 7.96-7.91 (m, 2H), 7.87 (d, *J* = 8.8 Hz, 1H), 7.82 (d, *J* = 7.6 Hz, 2H), 7.74 (d, *J* = 5.2 Hz, 1H), 7.63 (t, *J* = 8.0 Hz, 1H), 7.52 (t, *J* = 8.0 Hz, 2H), 7.41 (t, *J* = 7.6 Hz, 1H); <sup>13</sup>C NMR (DMSO-*d*<sub>6</sub>, 100 MHz) δ 161.4, 158.0, 139.7, 137.5, 137.0, 133.9, 133.2, 132.4, 131.6, 130.5, 130.4, 129.6, 128.4, 128.3, 128.0, 127.3, 126.9, 126.4, 126.2, 123.3, 122.0, 121.8 (five <sup>13</sup>C signals were not observed). HRMS (ESI) calcd for C<sub>29</sub>H<sub>17</sub>NNaO<sub>2</sub>S [M + Na]<sup>+</sup> 466.0872, found 466.0867.

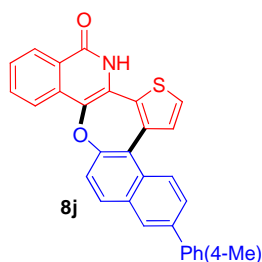

**3-(4-Methylphenyl)naphtho[1',2':6,7]thieno[2',3':4,5]oxepino[3,2-c]isoquinolin-12(13H)-one (8j):**

Petroleum ether/ethyl acetate (3:1) as eluent; brown solid (31 mg, 34%), mp 136-137 °C. <sup>1</sup>H NMR (DMSO-*d*<sub>6</sub>, 600 MHz) δ 11.78 (s, 1H), 8.44 (d, *J* = 7.8 Hz, 1H), 8.30 (s, 1H), 8.27 (d, *J* = 7.8 Hz, 1H), 8.19 (d, *J* = 9.0 Hz, 1H), 8.12 (d, *J* = 9.0 Hz, 1H), 8.09 (d, *J* = 5.4 Hz, 1H), 7.95-7.90 (m, 2H), 7.85 (d, *J* = 9.0 Hz, 1H), 7.74 (d, *J* = 5.4 Hz, 1H), 7.70 (d, *J* = 7.8 Hz, 2H), 7.64 (t, *J* = 7.8 Hz, 1H), 7.31 (d, *J* = 7.8 Hz, 2H), 2.36 (s, 3H); <sup>13</sup>C NMR (DMSO-*d*<sub>6</sub>, 150 MHz) δ 161.4, 157.9, 137.6, 137.4, 137.1, 136.8, 133.8, 133.2, 132.4, 131.5, 130.37, 130.35, 130.1, 128.3, 128.0, 127.1, 126.8, 126.2, 125.9, 123.3, 122.0, 121.7, 21.2 (five <sup>13</sup>C signals were not observed). HRMS (ESI) calcd for C<sub>30</sub>H<sub>19</sub>NNaO<sub>2</sub>S [M + Na]<sup>+</sup> 480.1029, found 480.1012.

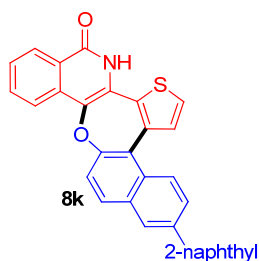

**3-(Naphthalen-2-yl)naphtho[1',2':6,7]thieno[2',3':4,5]oxepino[3,2-c]isoquinolin-12(13H)-one (8k):**

Petroleum ether/ethyl acetate (3:1) as eluent; yellow solid (34 mg, 34%), mp 143-144 °C. <sup>1</sup>H NMR (DMSO-*d*<sub>6</sub>, 600 MHz) δ 11.78 (s, 1H), 8.48 (d, *J* = 1.2 Hz, 1H), 8.44 (d, *J* = 7.8 Hz, 1H), 8.37 (s, 1H), 8.27-8.23 (m, 2H), 8.17 (d, *J* = 9.0 Hz, 1H), 8.10-8.07 (m, 2H), 8.03 (t, *J* = 8.4 Hz, 2H), 7.99 (dd, *J* = 8.4, 1.2 Hz, 1H), 7.96-7.92 (m, 2H), 7.87 (d, *J* = 9.0 Hz,

1H), 7.75 (d,  $J = 4.8$  Hz, 1H), 7.63 (t,  $J = 7.8$  Hz, 1H), 7.57-7.52 (m, 2H);  $^{13}\text{C}$  NMR (DMSO- $d_6$ , 100 MHz)  $\delta$  161.4, 158.1, 137.2, 137.04, 136.99, 133.8, 133.2, 132.9, 132.5, 131.6, 130.6, 130.4, 129.1, 128.7, 128.4, 128.0, 127.03, 127.01, 126.8, 126.7, 126.3, 126.0, 125.5, 123.4, 122.0, 121.8 (seven  $^{13}\text{C}$  signals were not observed). HRMS (ESI) calcd for  $\text{C}_{33}\text{H}_{20}\text{NO}_2\text{S}$  [ $\text{M} + \text{H}$ ] $^+$  494.1209, found 494.1190.

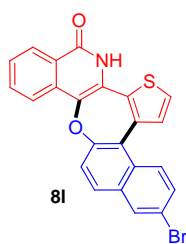

**3-Bromonaphtho[1',2':6,7]thieno[2',3':4,5]oxepino[3,2-c]isoquinolin-12(13H)-one (8l):**

Petroleum ether/ethyl acetate (3:1) as eluent; brown solid (28 mg, 32%), mp 124-125 °C.  $^1\text{H}$  NMR (DMSO- $d_6$ , 400 MHz)  $\delta$  11.75 (s, 1H), 8.42 (d,  $J = 8.4$  Hz, 1H), 8.32 (d,  $J = 2.0$  Hz, 1H), 8.24 (d,  $J = 8.0$  Hz, 1H), 8.09-8.05 (m, 3H), 7.94-7.89 (m, 2H), 7.71 (dd,  $J = 9.2, 2.4$  Hz, 1H), 7.68 (d,  $J = 5.2$  Hz, 1H), 7.63 (t,  $J = 7.2$  Hz, 1H);  $^{13}\text{C}$  NMR (DMSO- $d_6$ , 150 MHz)  $\delta$  161.4, 158.2, 136.51, 136.47, 133.8, 133.3, 133.1, 130.81, 130.79, 130.4, 130.3, 130.0, 128.5, 128.1, 128.0, 127.95, 127.89, 123.8, 122.6, 122.0, 119.3 (two  $^{13}\text{C}$  signals were not observed). HRMS (ESI) calcd for  $\text{C}_{23}\text{H}_{12}\text{BrNNaO}_2\text{S}$  [ $\text{M} + \text{Na}$ ] $^+$  467.9664, found 467.9669.

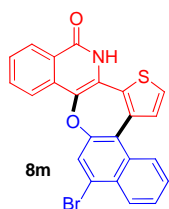

**5-Bromonaphtho[1',2':6,7]thieno[2',3':4,5]oxepino[3,2-c]isoquinolin-12(13H)-one (8m):**

Petroleum ether/ethyl acetate (3:1) as eluent; brown solid (36 mg, 40%), mp 106-107 °C.  $^1\text{H}$  NMR (DMSO- $d_6$ , 400 MHz)  $\delta$  11.80 (s, 1H), 8.51 (d,  $J = 8.0$  Hz, 1H), 8.34 (s, 1H), 8.25 (d,  $J$

= 7.6 Hz, 1H), 8.22-8.17 (m, 2H), 8.10 (d,  $J = 4.8$  Hz, 1H), 7.96-7.92 (m, 1H), 7.72-7.68 (m, 3H), 7.66-7.62 (m, 1H);  $^{13}\text{C}$  NMR (DMSO- $d_6$ , 150 MHz)  $\delta$  161.4, 157.1, 136.3, 133.9, 133.0, 131.9, 130.5, 130.1, 128.9, 128.6, 128.1, 128.0, 127.9, 127.5, 126.4, 125.3, 123.9, 123.8, 122.2 (four  $^{13}\text{C}$  signals were not observed). HRMS (ESI) calcd for  $\text{C}_{23}\text{H}_{12}\text{BrNNaO}_2\text{S}$  [ $\text{M} + \text{Na}$ ] $^+$  467.9664, found 467.9669.

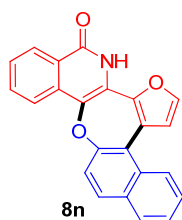

**Furo[2',3':4,5]naphtho[1',2':6,7]oxepino[3,2-*c*]isoquinolin-12(13*H*)-one (8n):** Petroleum ether/ethyl acetate (2:1) as eluent; yellow solid (25 mg, 35%), mp >300 °C.  $^1\text{H}$  NMR (DMSO- $d_6$ , 400 MHz)  $\delta$  11.83 (s, 1H), 8.43 (d,  $J = 8.0$  Hz, 1H), 8.33-8.24 (m, 3H), 8.08 (d,  $J = 8.8$  Hz, 1H), 8.03 (d,  $J = 8.4$  Hz, 1H), 7.94-7.90 (m, 1H), 7.85 (d,  $J = 8.8$  Hz, 1H), 7.66-7.62 (m, 2H), 7.57 (t,  $J = 7.6$  Hz, 1H), 7.42 (d,  $J = 2.0$  Hz, 1H);  $^{13}\text{C}$  NMR (DMSO- $d_6$ , 150 MHz)  $\delta$  161.0, 155.6, 145.2, 144.4, 134.9, 133.8, 133.3, 131.9, 131.3, 131.0, 129.2, 128.2, 128.13, 128.08, 126.3, 126.2, 125.1, 122.7, 122.6, 122.1, 121.6, 120.4, 113.6. HRMS (ESI) calcd for  $\text{C}_{23}\text{H}_{14}\text{NO}_3$  [ $\text{M} + \text{H}$ ] $^+$  352.0968, found 352.0970.

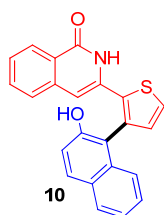

**3-(3-(2-Hydroxynaphthalen-1-yl)thiophen-2-yl)isoquinolin-1(2*H*)-one (10):** Petroleum ether/ethyl acetate (3:1) as eluent; brown solid (24 mg, 32%), mp 171-172 °C.  $^1\text{H}$  NMR (DMSO- $d_6$ , 600 MHz)  $\delta$  10.68 (s, 1H), 10.22 (s, 1H), 8.04 (d,  $J = 8.4$  Hz, 1H), 7.86 (d,  $J = 4.8$



Hz, 1H), 7.83 (d,  $J = 9.0$  Hz, 1H), 7.81 (d,  $J = 7.8$  Hz, 1H), 7.60-7.57 (m, 1H), 7.40-7.38 (m, 2H), 7.34-7.25 (m, 4H), 7.07 (d,  $J = 4.8$  Hz, 1H), 6.48 (s, 1H);  $^{13}\text{C}$  NMR (DMSO- $d_6$ , 150 MHz)  $\delta$  162.1, 152.9, 137.8, 135.4, 134.7, 134.1, 133.4, 133.2, 132.4, 130.2, 128.5, 128.4, 127.11, 127.07, 127.0, 126.9, 125.0, 124.3, 123.4, 118.6, 115.3, 105.2 (one  $^{13}\text{C}$  signal was not observed). HRMS (ESI) calcd for  $\text{C}_{23}\text{H}_{15}\text{NNaO}_2\text{S}$   $[\text{M} + \text{Na}]^+$  392.0716, found 392.0710.

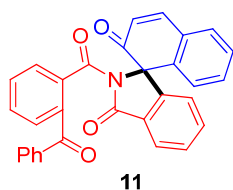

**2-(2-Benzoylbenzoyl)-2'*H*-spiro[isoindoline-1,1'-naphthalene]-2',3-dione (11):** Petroleum ether/ethyl acetate (3:1) as eluent; white solid (84 mg, 89%), mp 138-139 °C.  $^1\text{H}$  NMR ( $\text{CDCl}_3$ , 600 MHz)  $\delta$  7.88 (d,  $J = 7.2$  Hz, 2H), 7.79 (d,  $J = 7.2$  Hz, 1H), 7.70 (d,  $J = 9.6$  Hz, 1H), 7.65-7.62 (m, 3H), 7.56 (t,  $J = 7.2$  Hz, 1H), 7.53-7.50 (m, 1H), 7.47-7.37 (m, 5H), 7.33-7.29 (m, 3H), 7.08 (d,  $J = 7.8$  Hz, 1H), 6.37 (d,  $J = 9.6$  Hz, 1H);  $^{13}\text{C}$  NMR ( $\text{CDCl}_3$ , 150 MHz)  $\delta$  195.5, 192.4, 168.3, 167.0, 147.1, 145.0, 139.7, 137.4, 137.2, 136.7, 134.7, 132.5, 131.5, 131.1, 130.41, 130.39, 130.3, 129.5, 129.3, 129.04, 129.01, 128.45, 128.39, 128.3, 126.3, 125.9, 124.3, 121.6, 73.5. HRMS (ESI) calcd for  $\text{C}_{31}\text{H}_{19}\text{NNaO}_4$   $[\text{M} + \text{Na}]^+$  492.1206, found 492.1195.

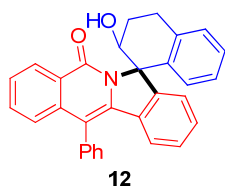

**2'-Hydroxy-12-phenyl-3',4'-dihydro-2'*H*,5*H*-spiro[isoindolo[2,1-*b*]isoquinoline-7,1'-naphthalen]-5-one (12):** Petroleum ether/ethyl acetate (5:1) as eluent; white solid (63 mg, 71%), mp >300 °C.  $^1\text{H}$  NMR ( $\text{CDCl}_3$ , 600 MHz)  $\delta$  8.41 (dd,  $J = 7.8, 1.2$  Hz, 1H), 7.66-7.61 (m, 3H),

7.59-7.56 (m, 1H), 7.53 (d,  $J = 7.8$  Hz, 1H), 7.47-7.43 (m, 2H), 7.30 (d,  $J = 7.8$  Hz, 1H), 7.23 (d,  $J = 8.4$  Hz, 1H), 7.21-7.17 (m, 2H), 7.05 (d,  $J = 7.8$  Hz, 1H), 7.03-7.01 (m, 1H), 6.97 (t,  $J = 7.8$  Hz, 1H), 6.61 (d,  $J = 7.2$  Hz, 1H), 6.36 (d,  $J = 8.4$  Hz, 1H), 5.60 (d,  $J = 7.8$  Hz, 1H), 4.30-4.28 (m, 1H), 3.54-3.49 (m, 1H), 2.98 (dt,  $J = 16.8, 4.8$  Hz, 1H), 2.53-2.48 (m, 1H), 2.41-2.36 (m, 1H);  $^{13}\text{C}$  NMR ( $\text{CDCl}_3$ , 150 MHz)  $\delta$  163.4, 148.0, 138.7, 138.5, 137.1, 135.2, 134.3, 132.6, 131.8, 131.3, 130.8, 129.8, 129.6, 129.5, 129.1, 128.7, 128.20, 128.17, 127.6, 126.7, 126.2, 125.3, 125.2, 124.0, 123.8, 115.9, 76.7, 76.0, 28.7, 24.3 (one  $^{13}\text{C}$  signal was not observed). HRMS (ESI) calcd for  $\text{C}_{31}\text{H}_{23}\text{NNaO}_2$   $[\text{M} + \text{Na}]^+$  464.1621, found 464.1605.

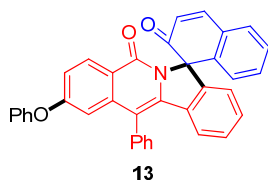

**2-Phenoxy-12-phenyl-2'*H*,5*H*-spiro[isoindolo[2,1-*b*]isoquinoline-7,1'-naphthalene]-2',5-dione (13):** Petroleum ether/ethyl acetate (2:1) as eluent; yellow solid (34 mg, 64%), mp 170-171 °C.  $^1\text{H}$  NMR ( $\text{CDCl}_3$ , 400 MHz)  $\delta$  8.23 (d,  $J = 8.8$  Hz, 1H), 7.67 (d,  $J = 10.0$  Hz, 1H), 7.52-7.40 (m, 6H), 7.26-7.21 (m, 3H), 7.13 (td,  $J = 7.6, 1.2$  Hz, 1H), 7.08-7.02 (m, 2H), 6.97 (d,  $J = 7.2$  Hz, 2H), 6.94-6.90 (m, 3H), 6.79-6.78 (m, 2H), 6.43-6.40 (m, 2H);  $^{13}\text{C}$  NMR ( $\text{CDCl}_3$ , 100 MHz)  $\delta$  192.9, 161.1, 158.8, 155.9, 146.3, 142.6, 141.5, 140.5, 139.7, 134.6, 133.4, 131.3, 131.0, 130.9, 130.2, 130.1, 129.90, 129.87, 129.6, 129.5, 129.4, 128.8, 128.6, 128.4, 125.3, 125.2, 125.0, 124.2, 121.6, 121.1, 119.6, 117.1, 114.1, 113.6, 76.1. HRMS (ESI) calcd for  $\text{C}_{37}\text{H}_{23}\text{NNaO}_3$   $[\text{M} + \text{Na}]^+$  552.1570, found 552.1549.

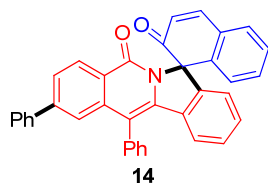

**2,12-Diphenyl-2'*H*,5*H*-spiro[isoindolo[2,1-*b*]isoquinoline-7,1'-naphthalene]-2',5-dione**

**(14):** Petroleum ether/ethyl acetate (2:1) as eluent; white solid (32 mg, 61%), mp >300 °C. <sup>1</sup>H NMR (CDCl<sub>3</sub>, 400 MHz) δ 8.44 (d, *J* = 8.4 Hz, 1H), 7.77 (d, *J* = 10.0 Hz, 1H), 7.69-7.57 (m, 6H), 7.52-7.49 (m, 3H), 7.46 (d, *J* = 1.2 Hz, 1H), 7.43-7.39 (m, 2H), 7.37-7.30 (m, 2H), 7.23-7.19 (m, 1H), 7.16-7.12 (m, 1H), 7.06-7.03 (m, 2H), 6.87 (d, *J* = 7.6 Hz, 1H), 6.51 (d, *J* = 10.0 Hz, 1H), 6.46 (d, *J* = 7.6 Hz, 1H); <sup>13</sup>C NMR (CDCl<sub>3</sub>, 150 MHz) δ 192.9, 159.1, 146.4, 145.3, 142.5, 140.4, 139.6, 139.3, 134.8, 133.5, 131.4, 131.1, 130.9, 130.1, 129.8, 129.7, 129.51, 129.48, 128.90, 128.87, 128.7, 128.5, 128.4, 128.1, 127.6, 125.9, 125.3, 125.2, 125.0, 124.5, 123.8, 121.6, 114.7, 76.1 (one <sup>13</sup>C signal was not observed). HRMS (ESI) calcd for C<sub>37</sub>H<sub>23</sub>NNaO<sub>2</sub> [M + Na]<sup>+</sup> 536.1621, found 536.1604.

## 9. The $^1\text{H}$ , $^{13}\text{C}$ , and $^{19}\text{F}$ NMR Spectra of 3aa-3sa, 3ab-3ap, 5a-5j, 8a-8n, and 10-14

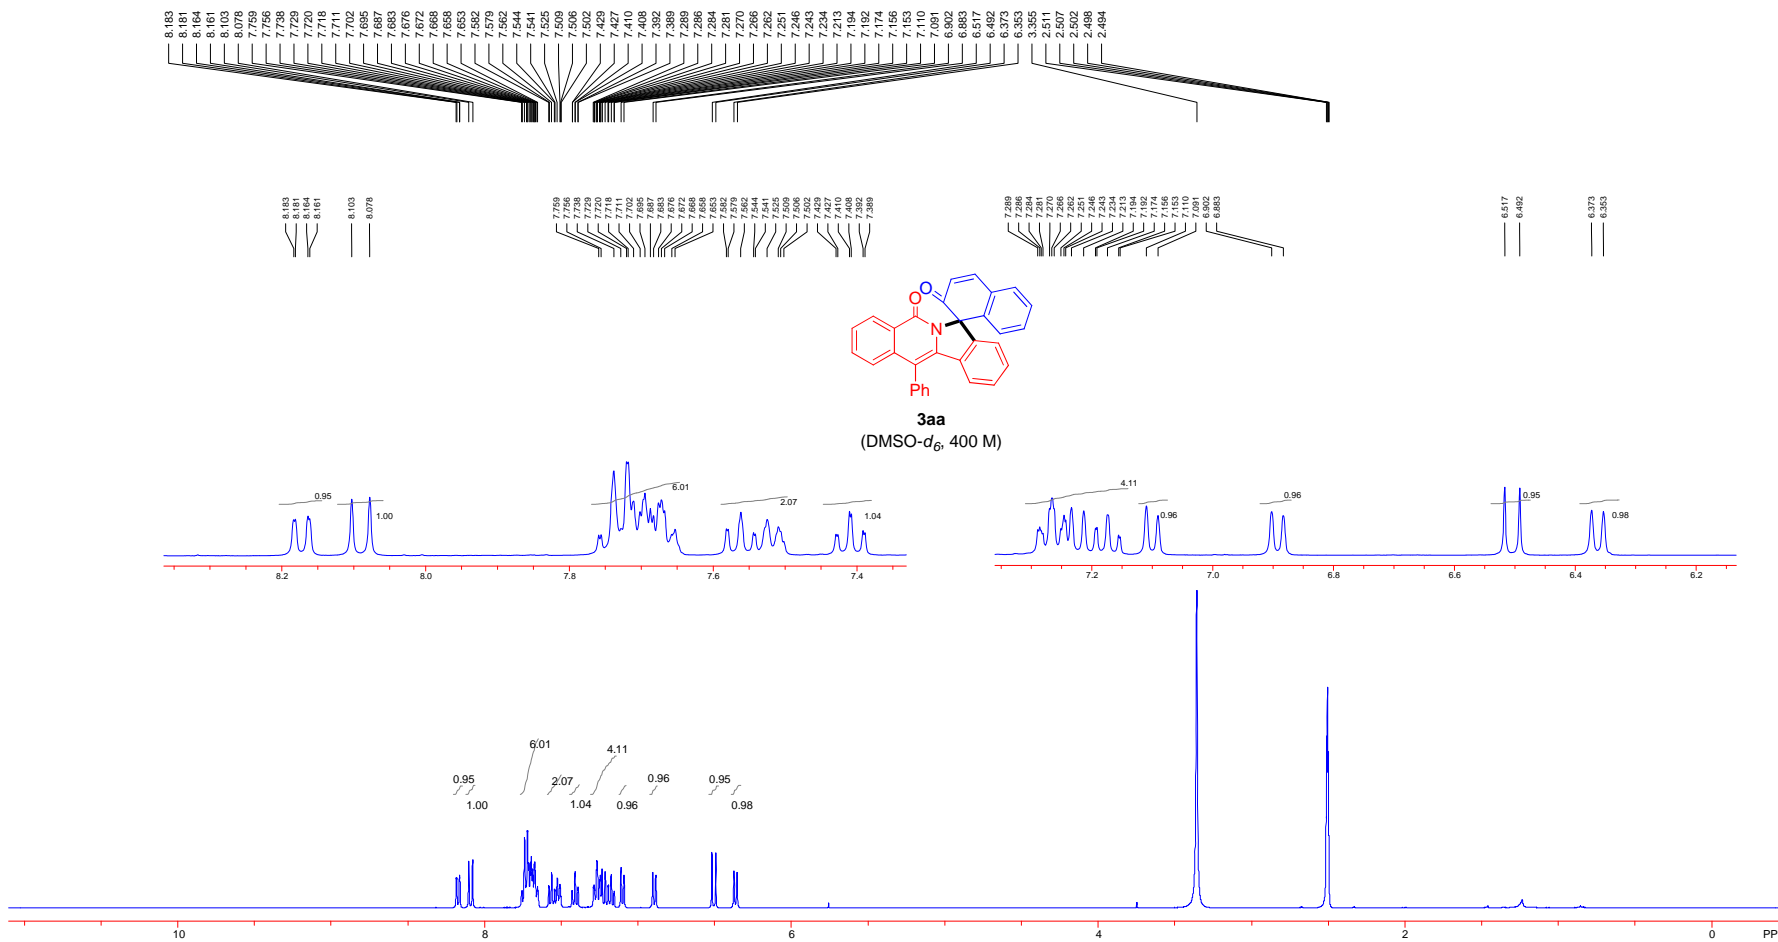

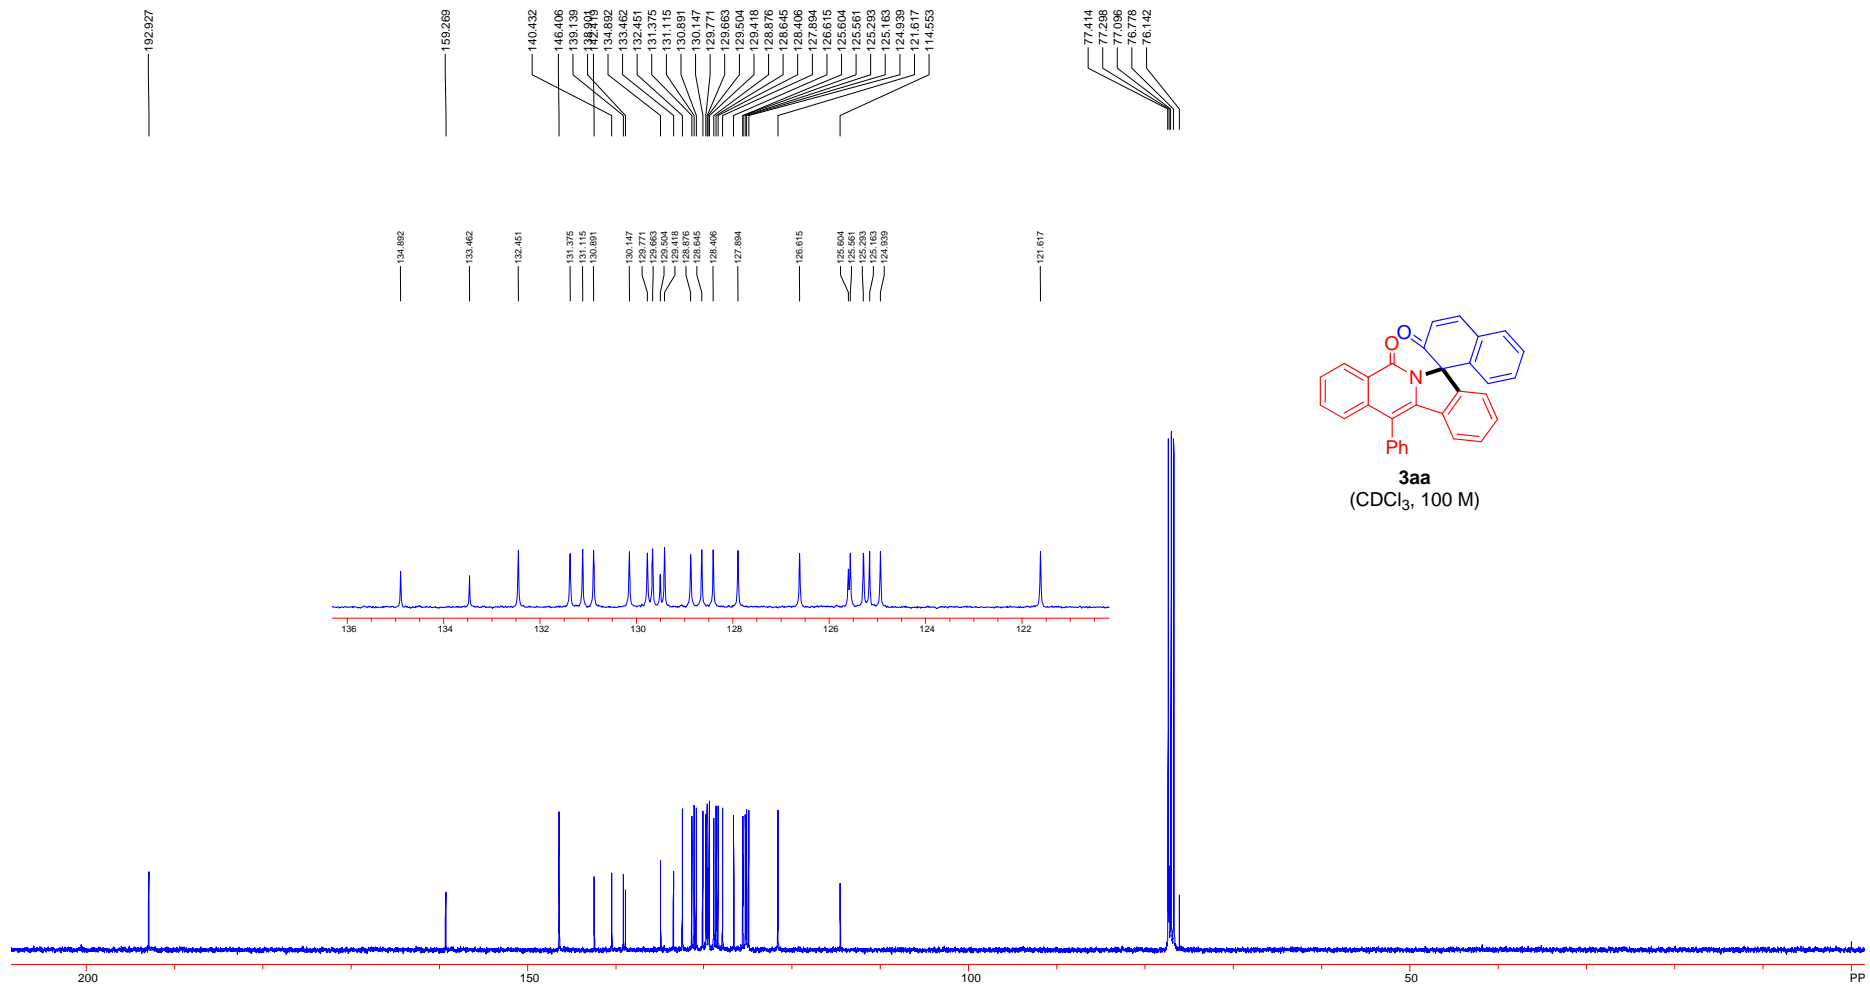

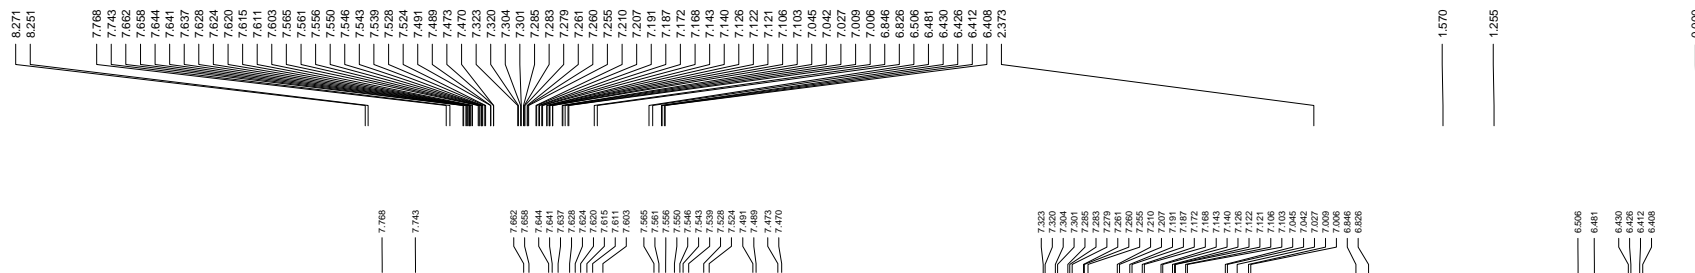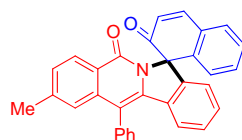

**3ba**  
(CDCl<sub>3</sub>, 400 M)

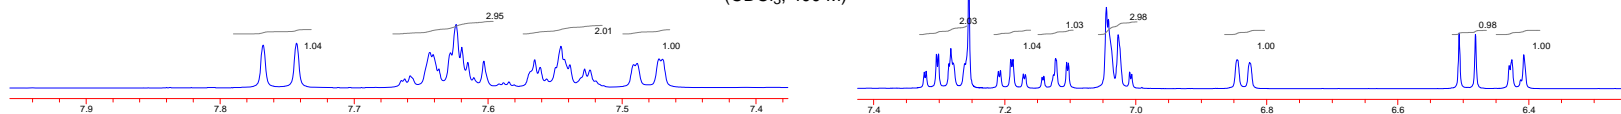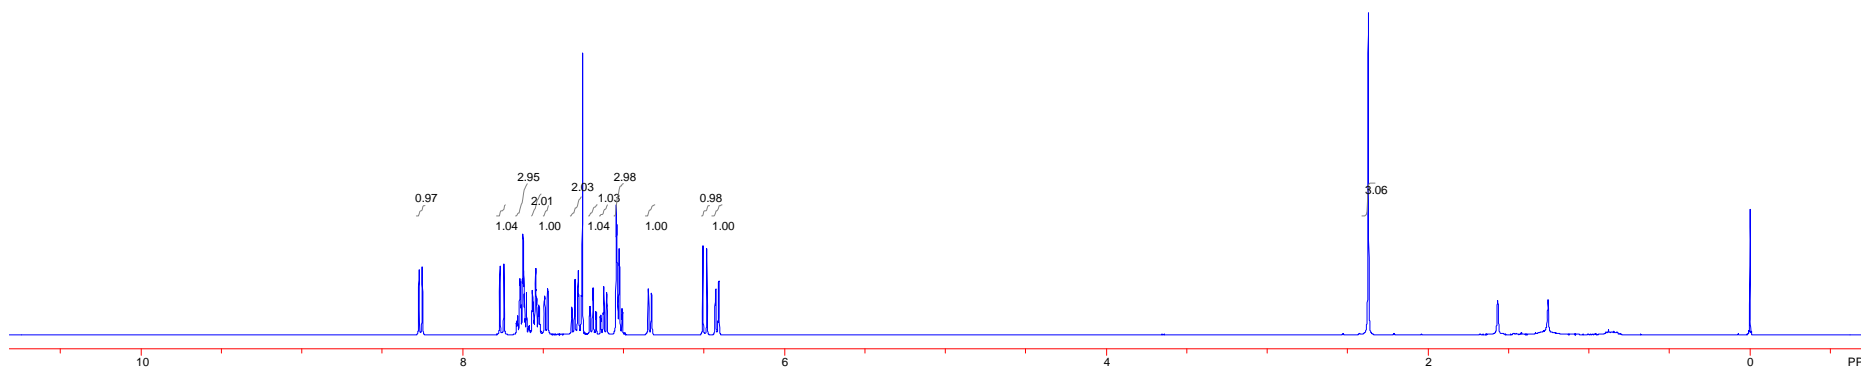

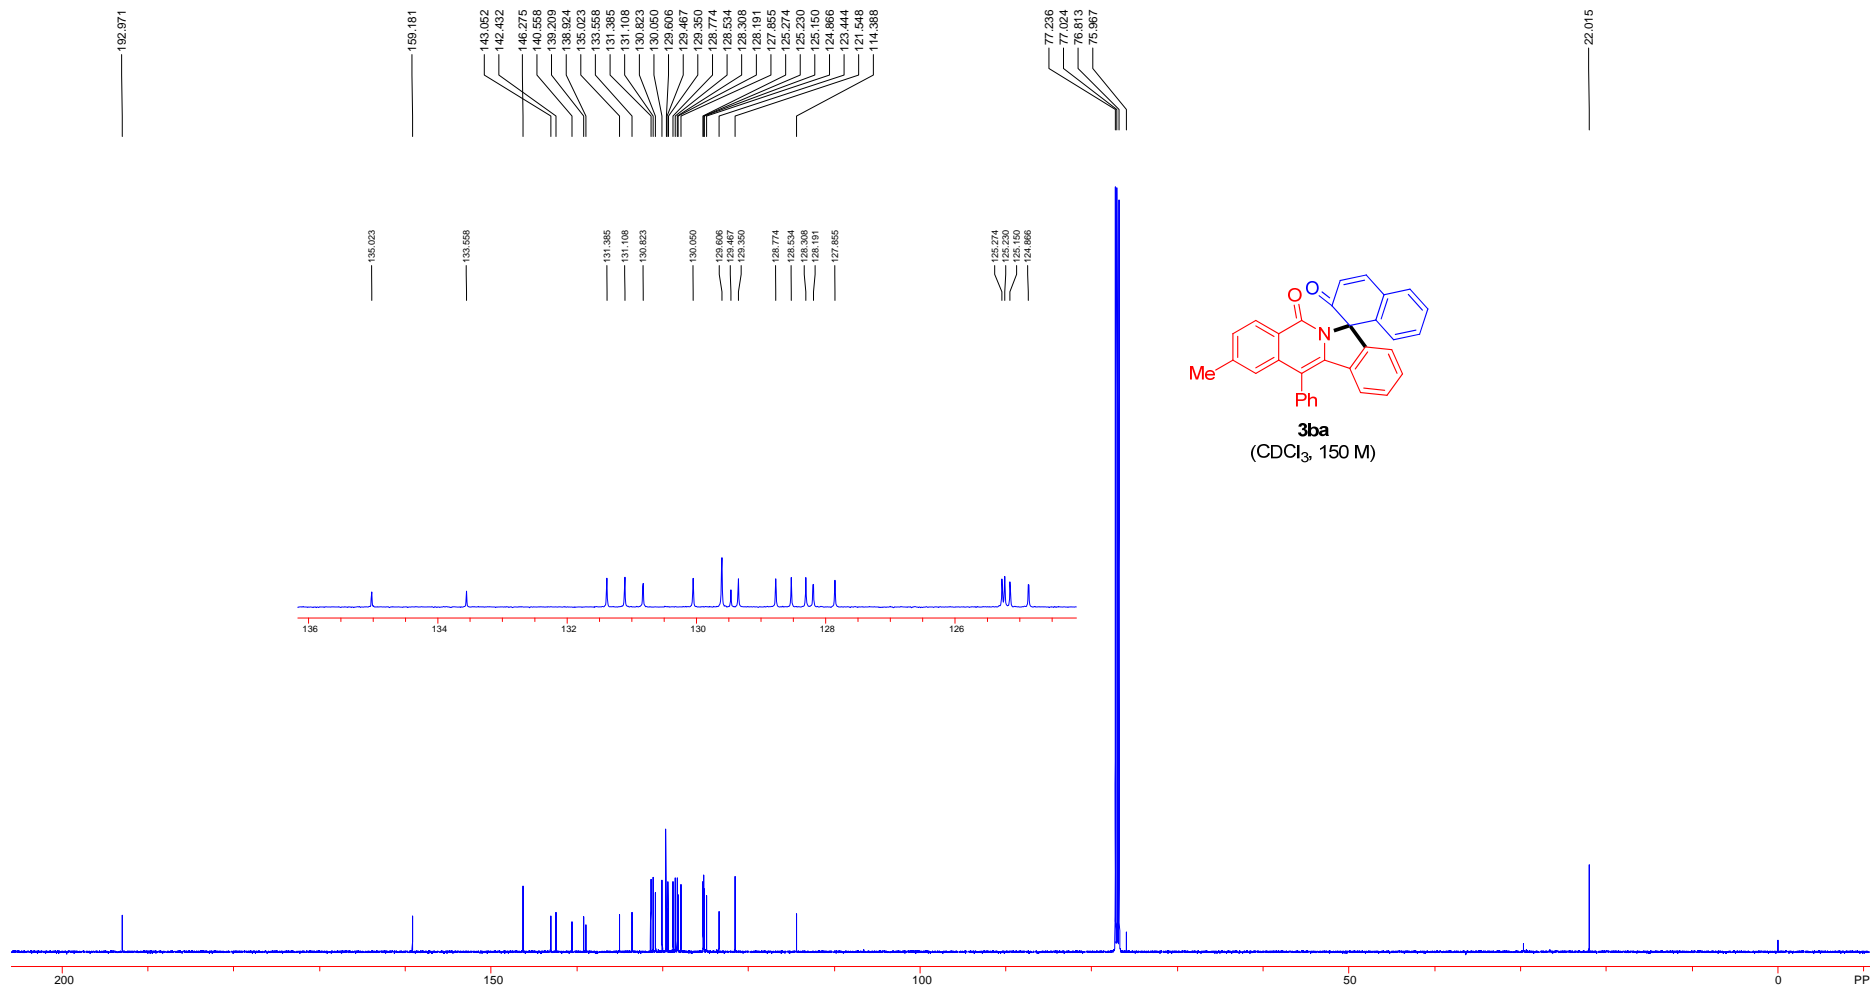

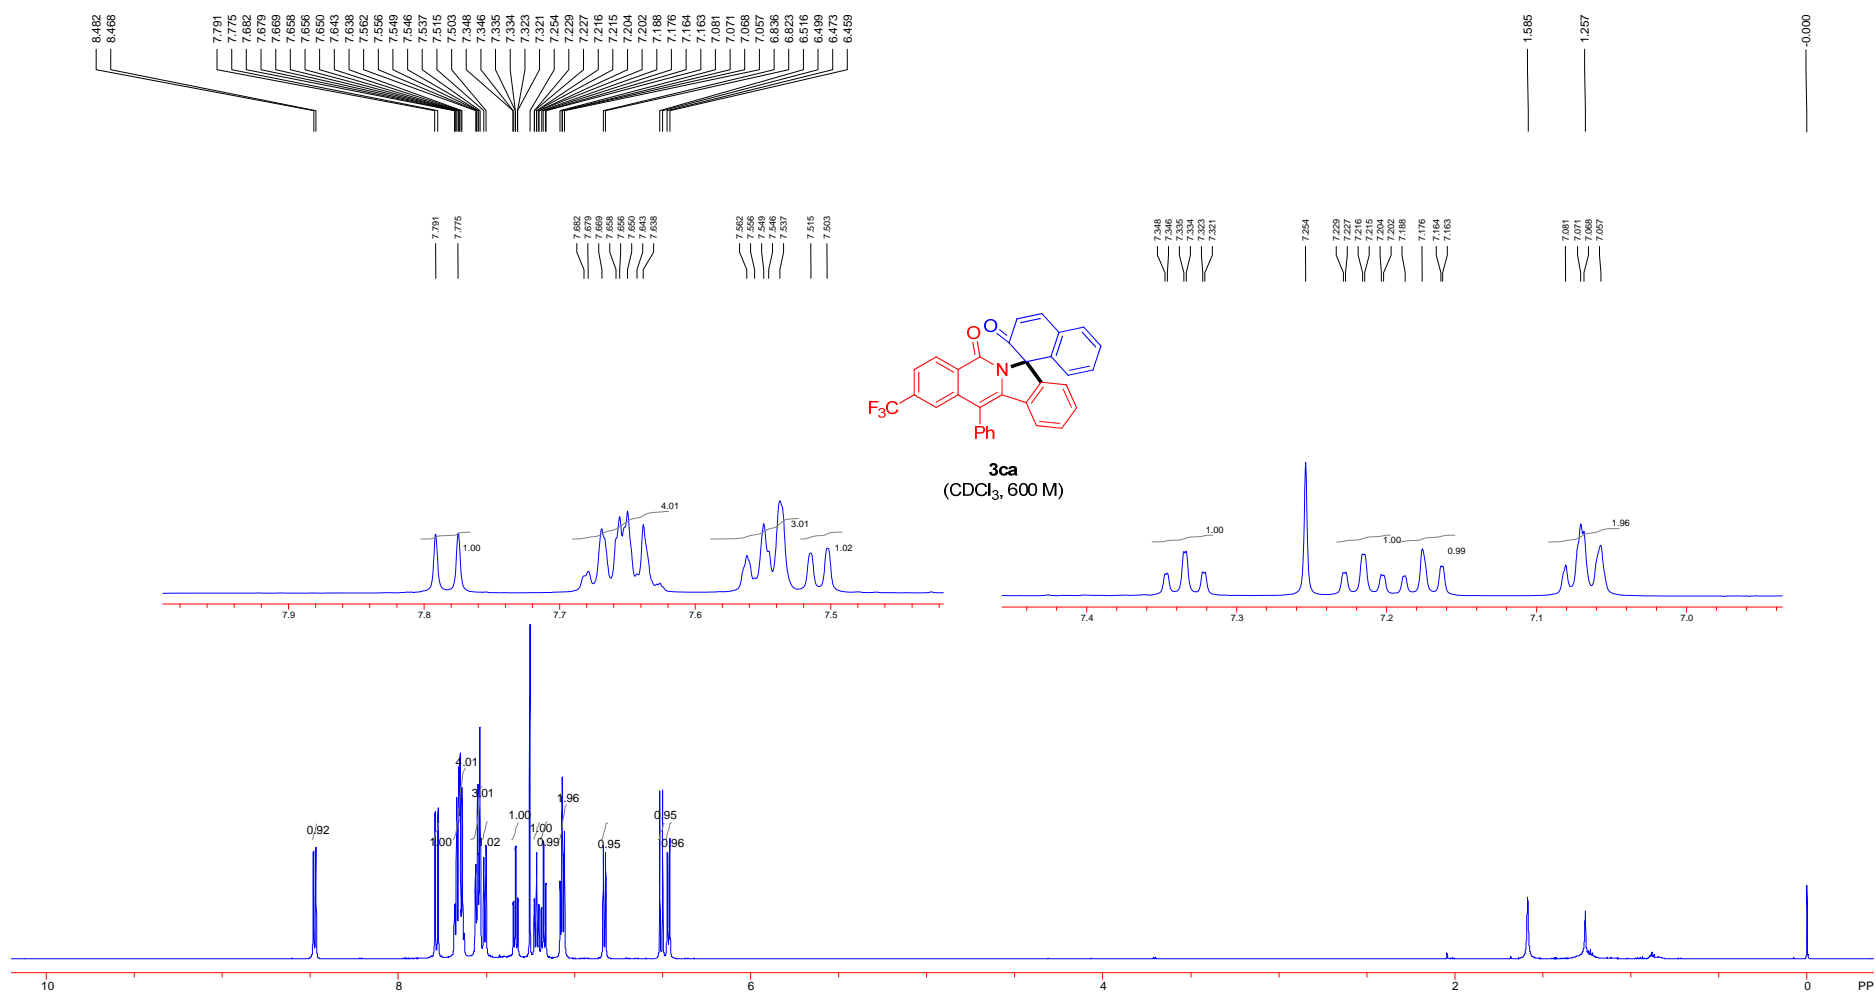



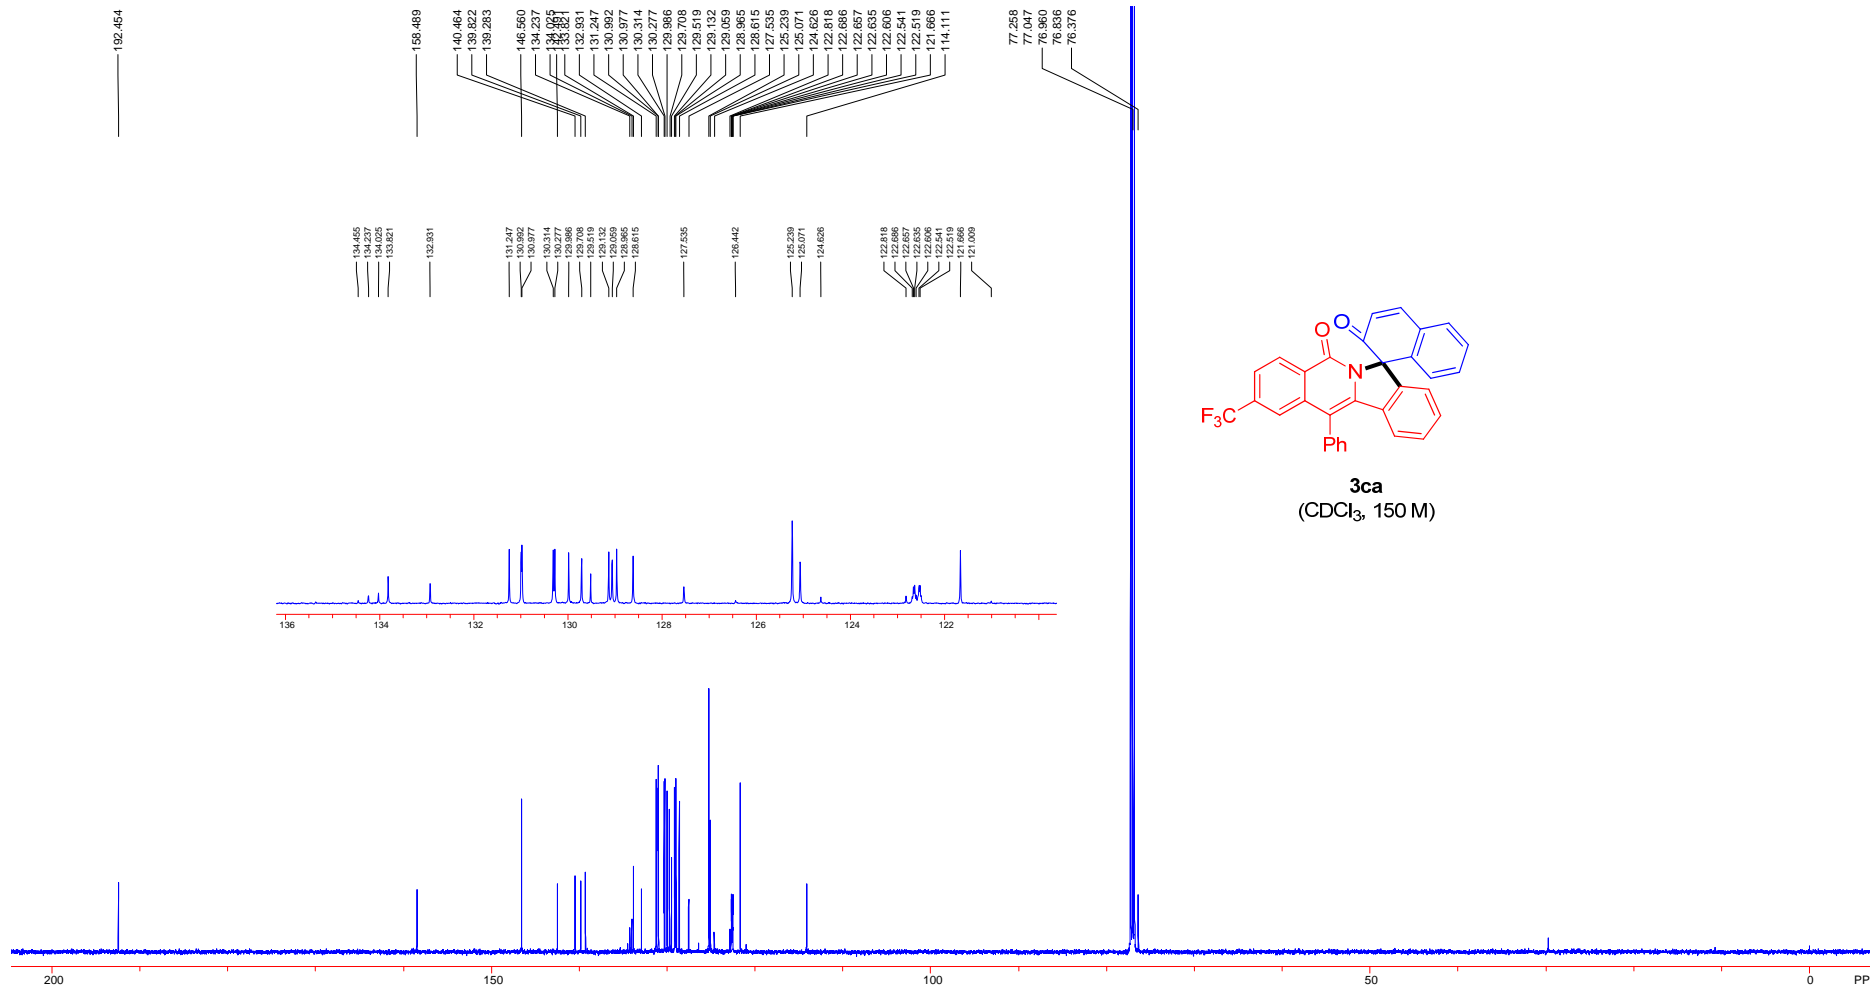

67.950

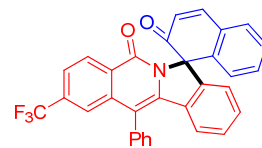

**3ca**  
(CDCl<sub>3</sub>, 564 M)

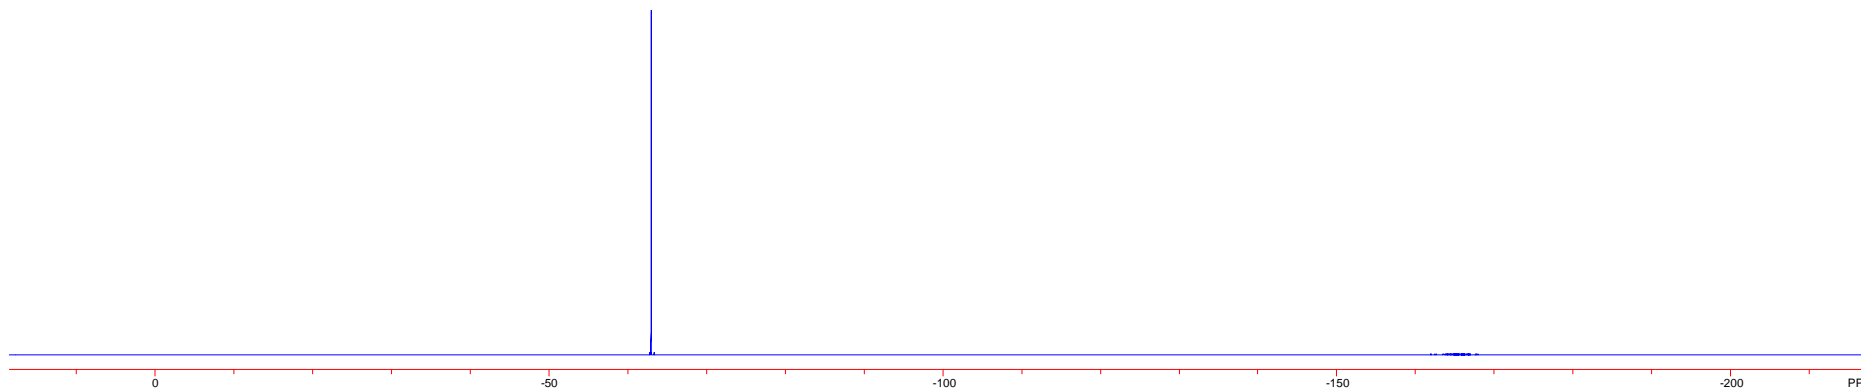

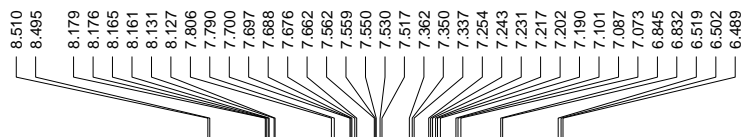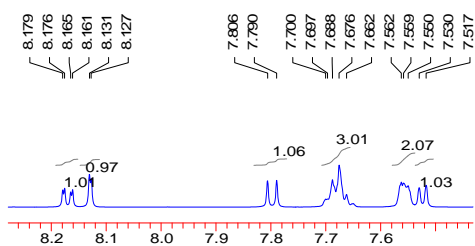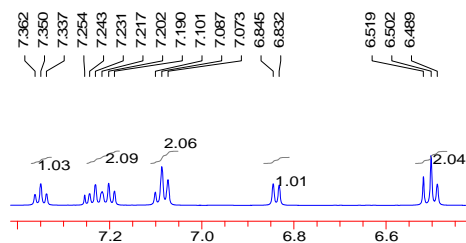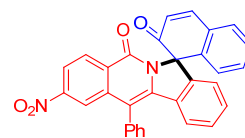

**3da**  
(CDCl<sub>3</sub>, 600 M)

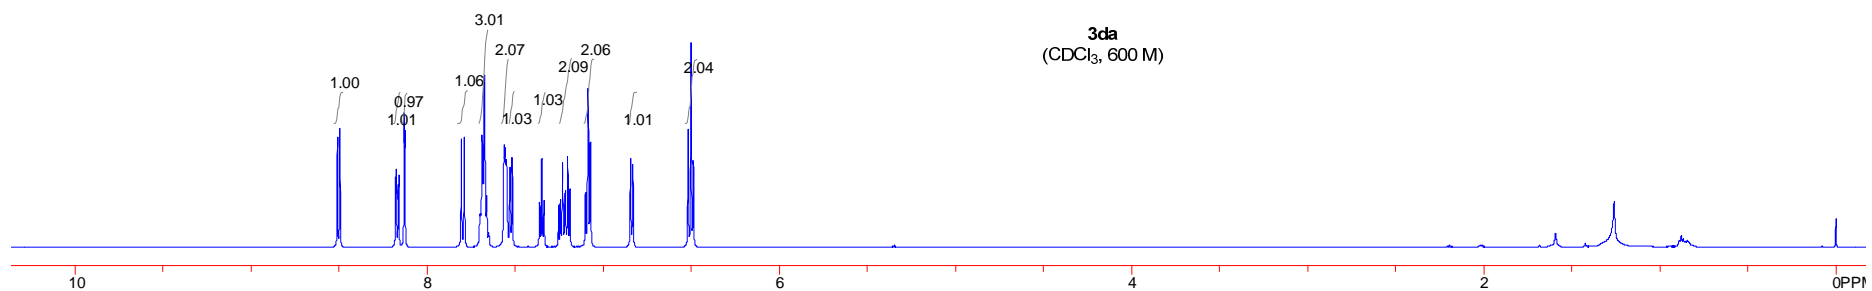

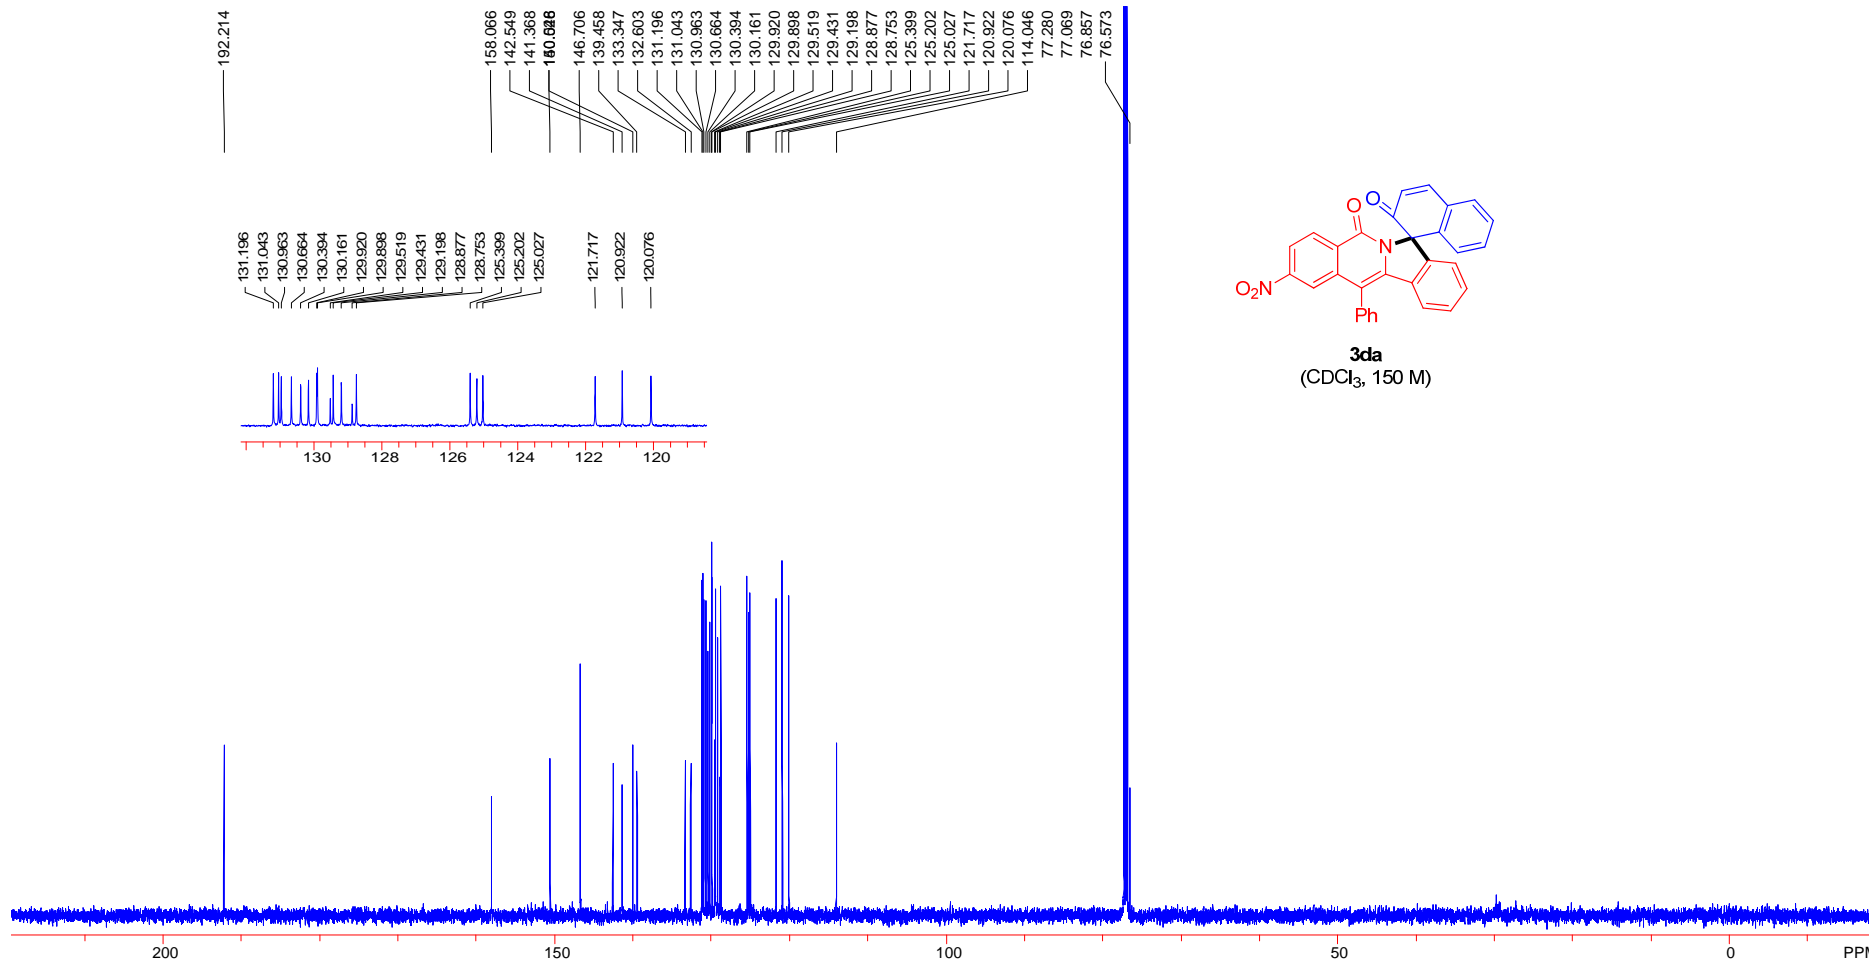

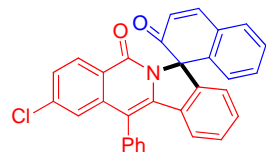

**3ea**  
(CDCl<sub>3</sub>, 400 M)

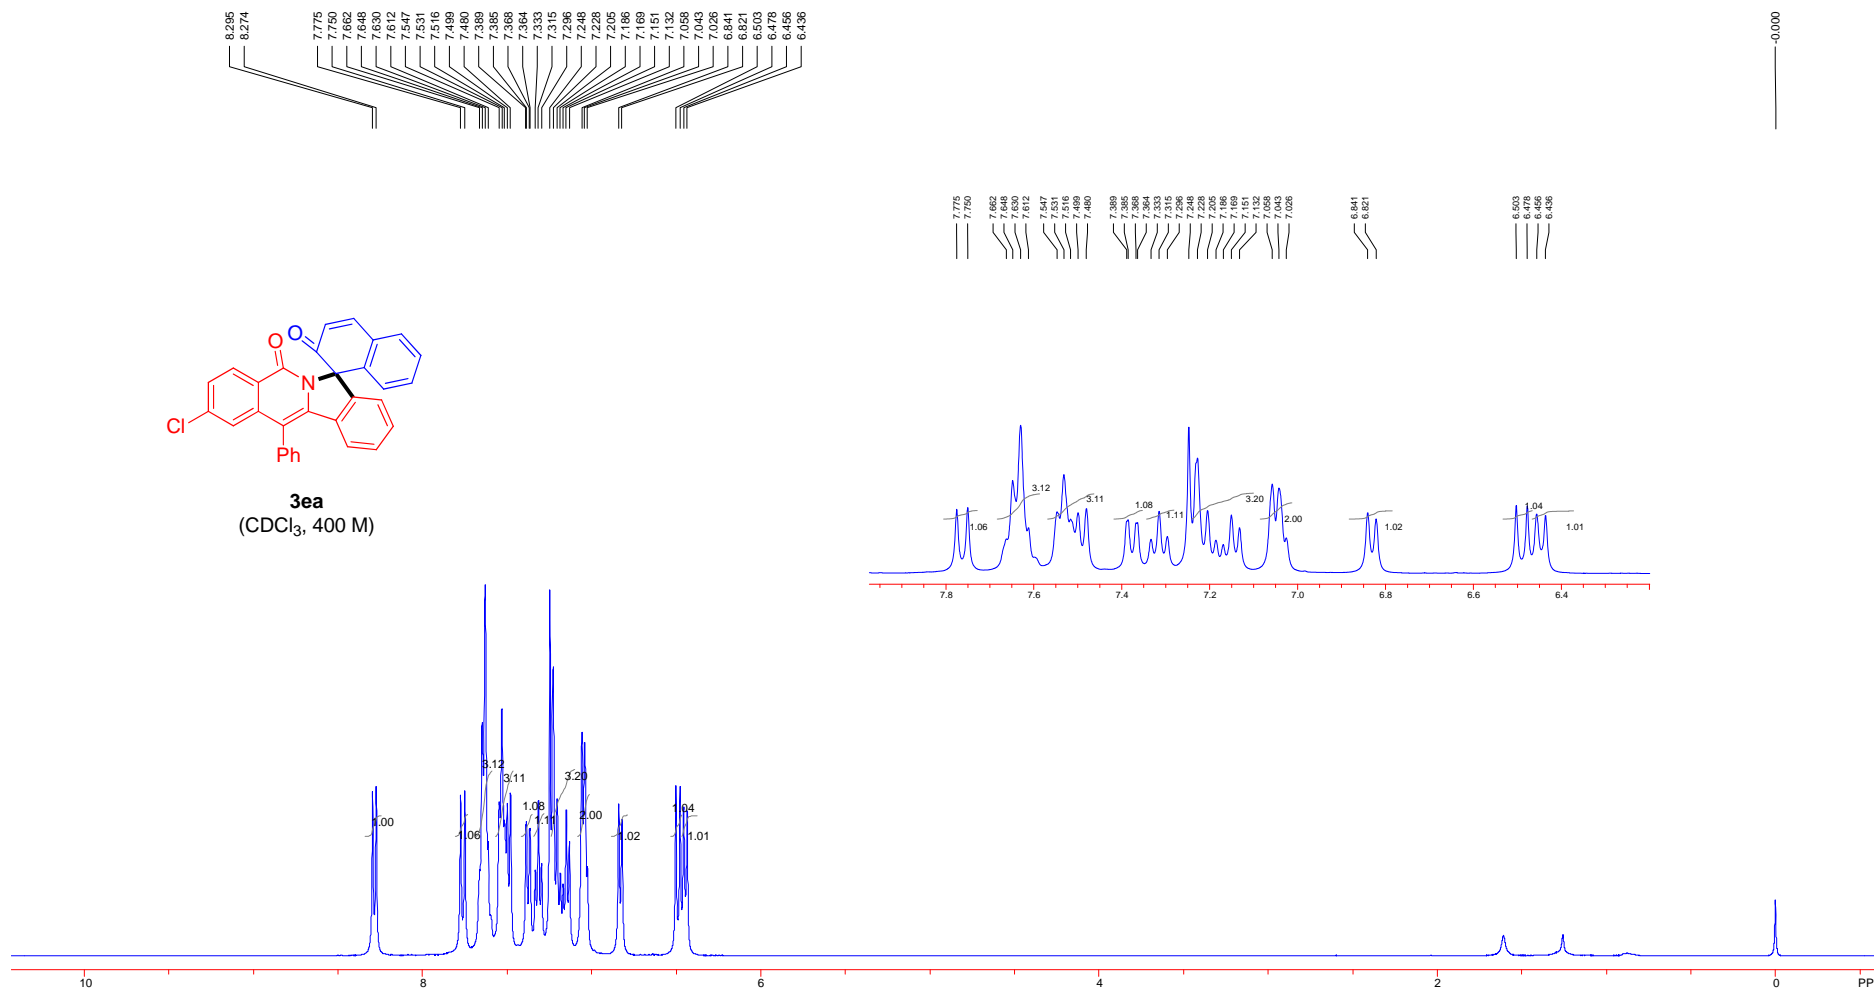

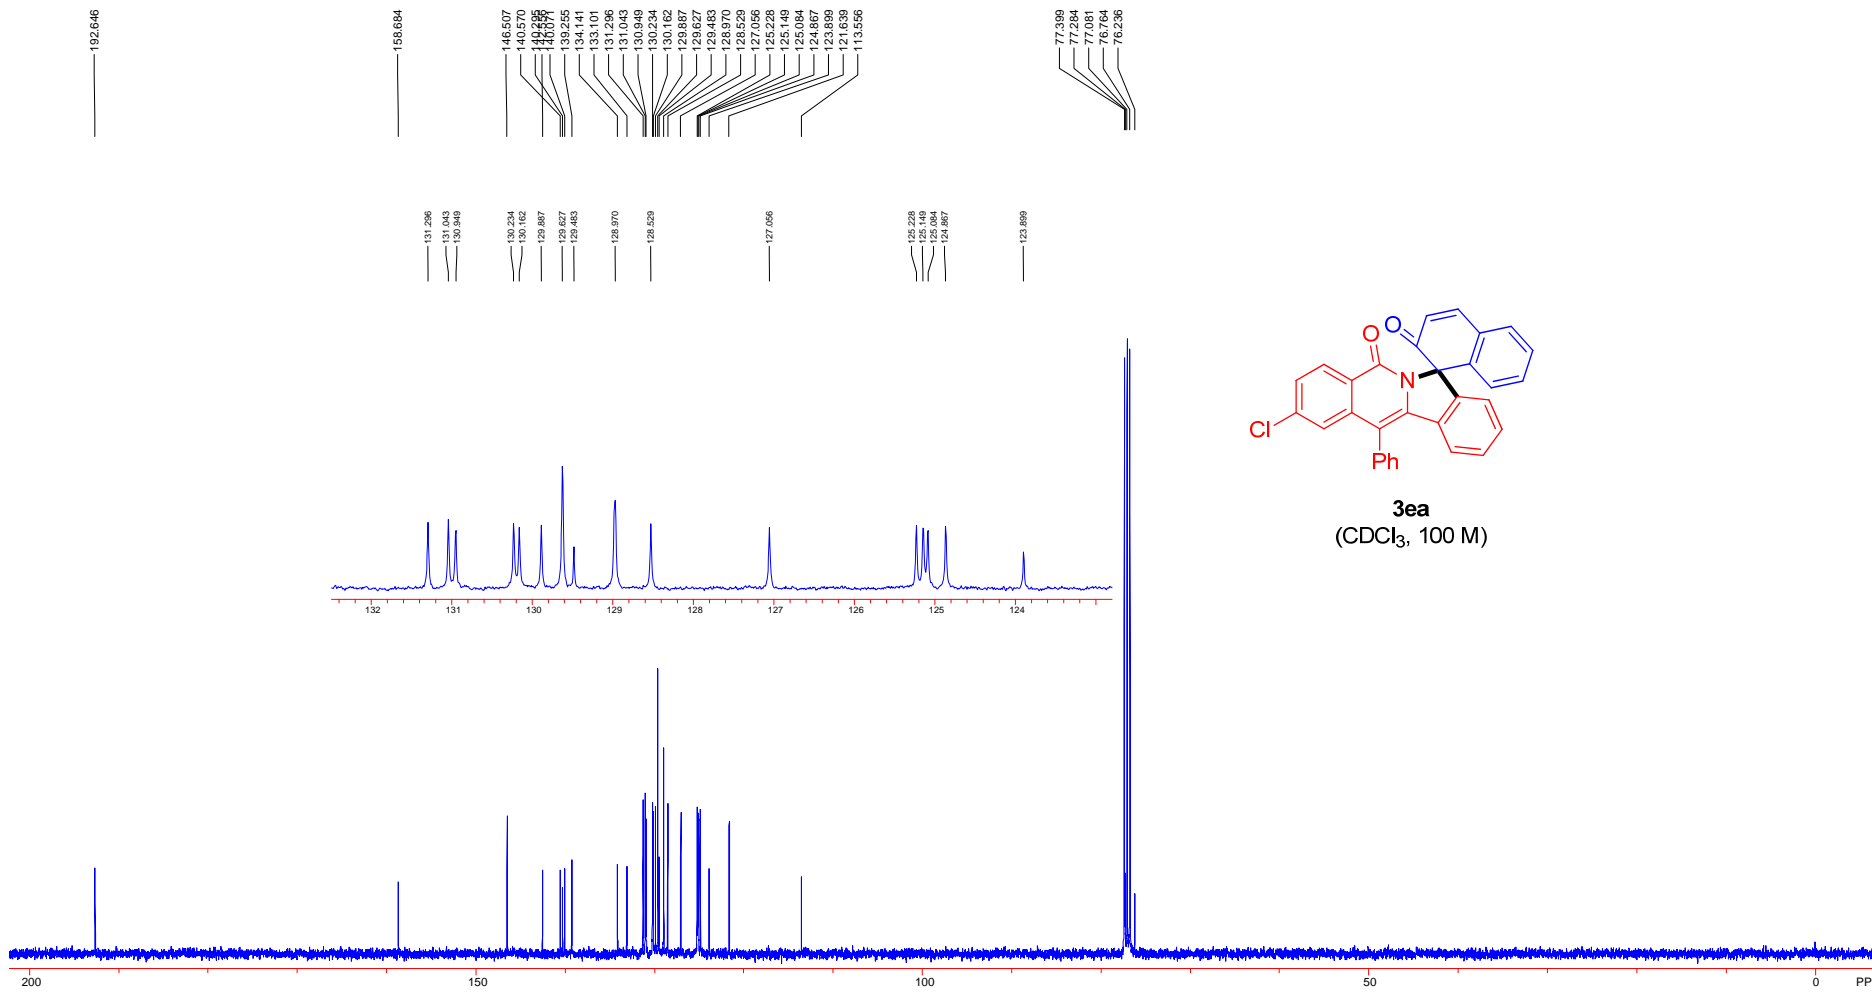

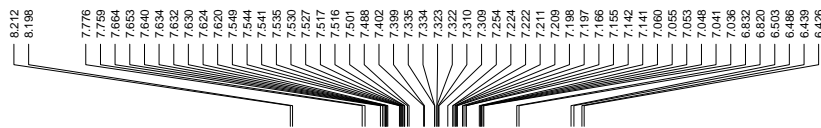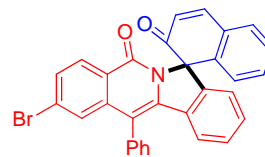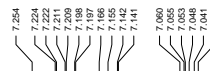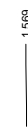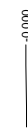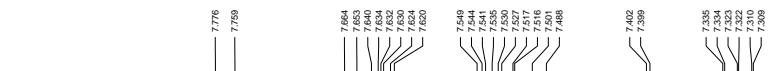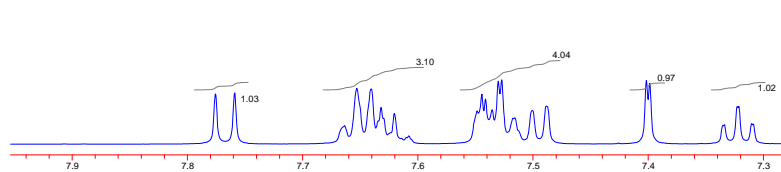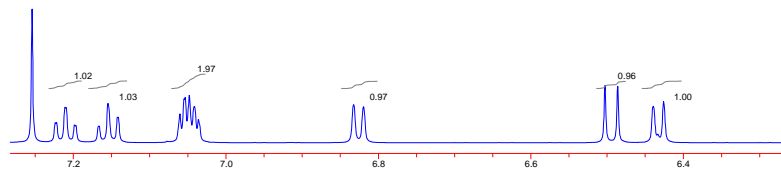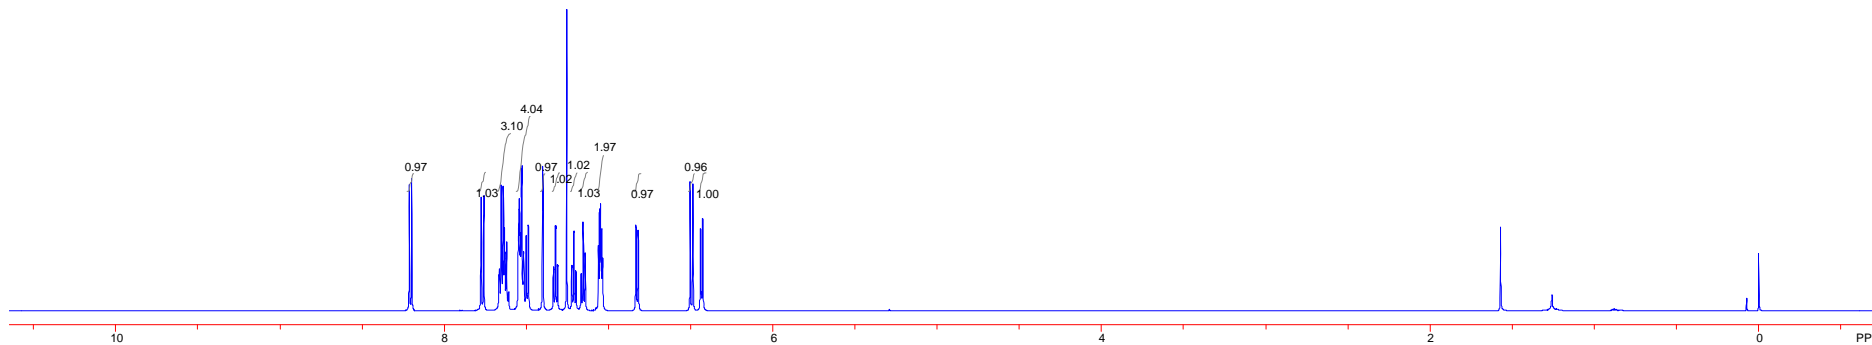

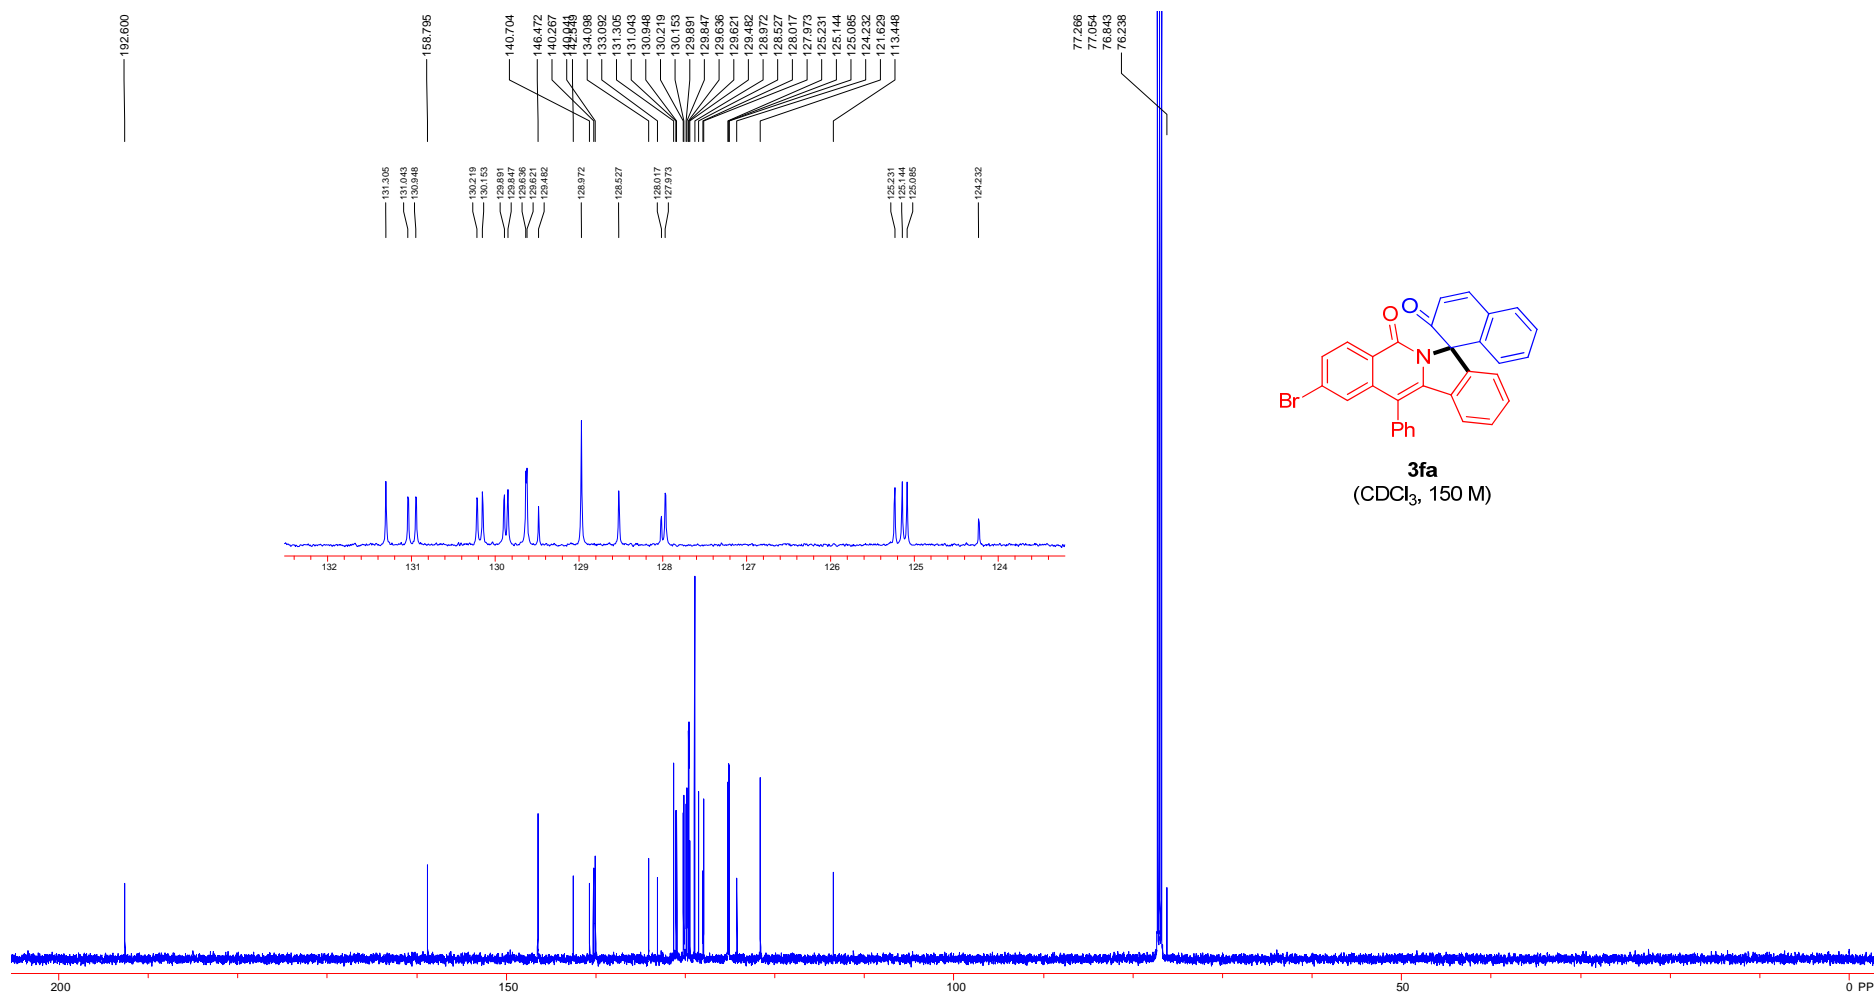



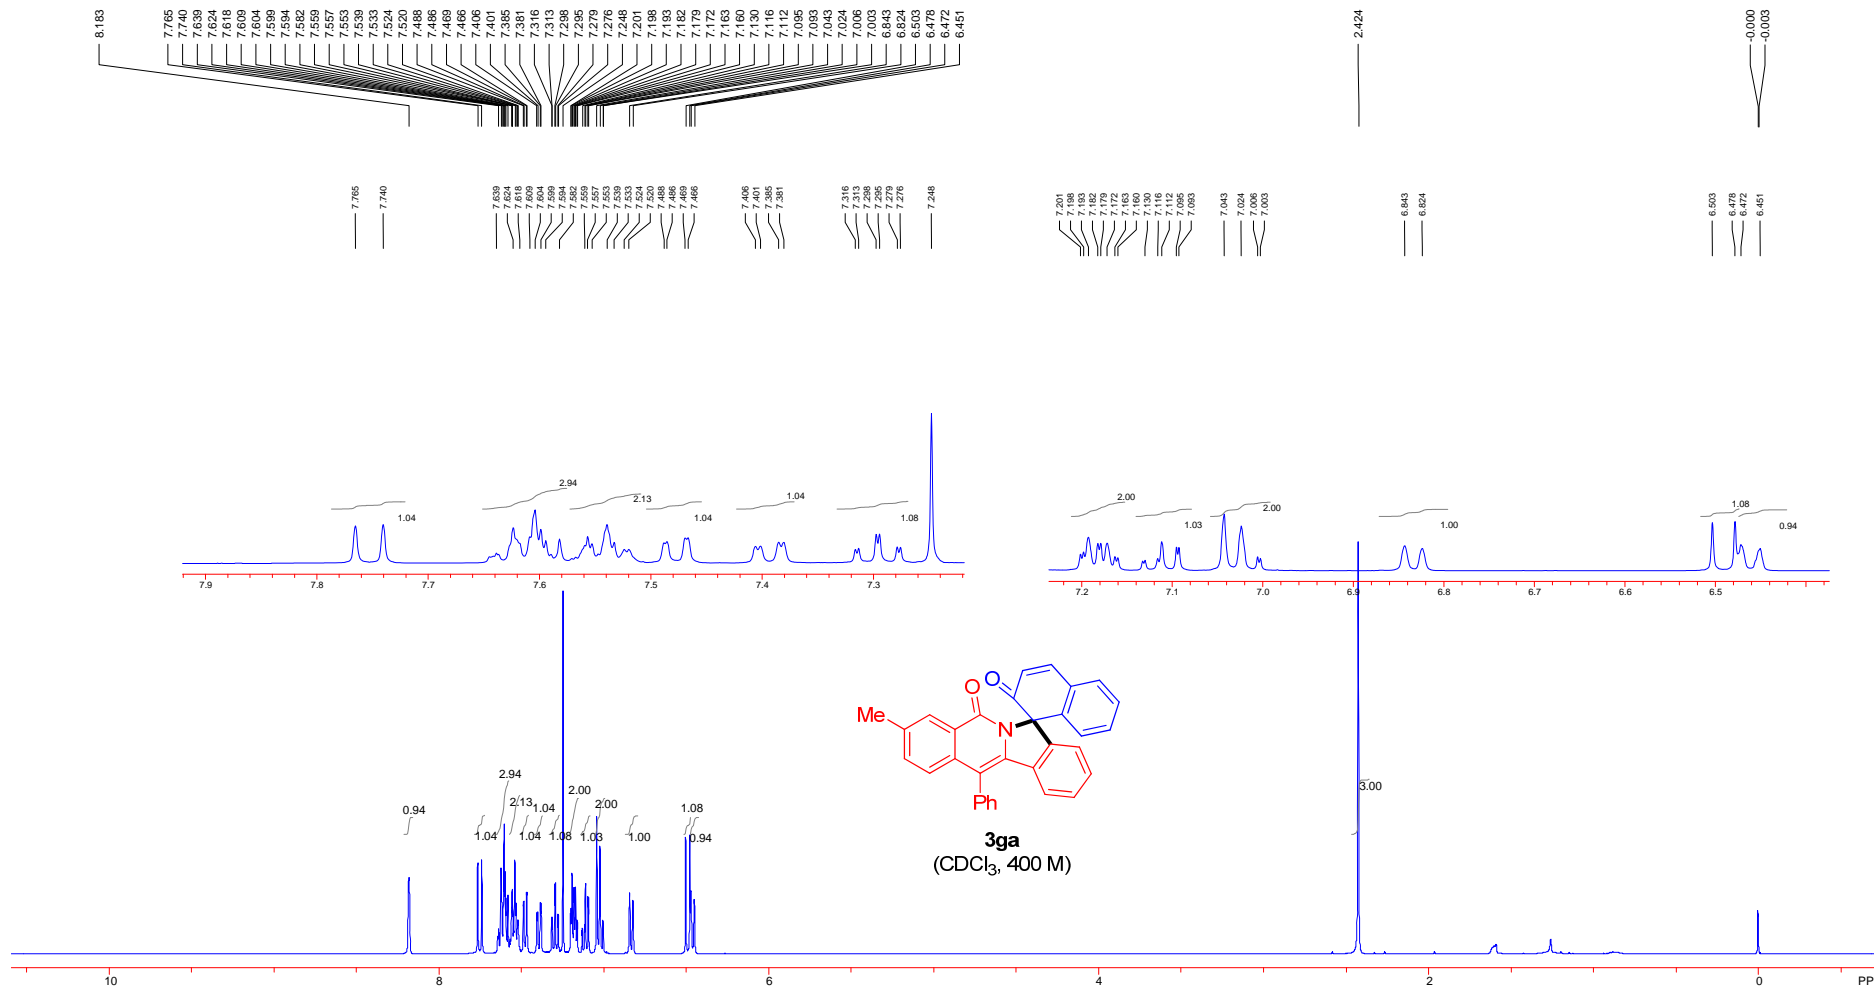

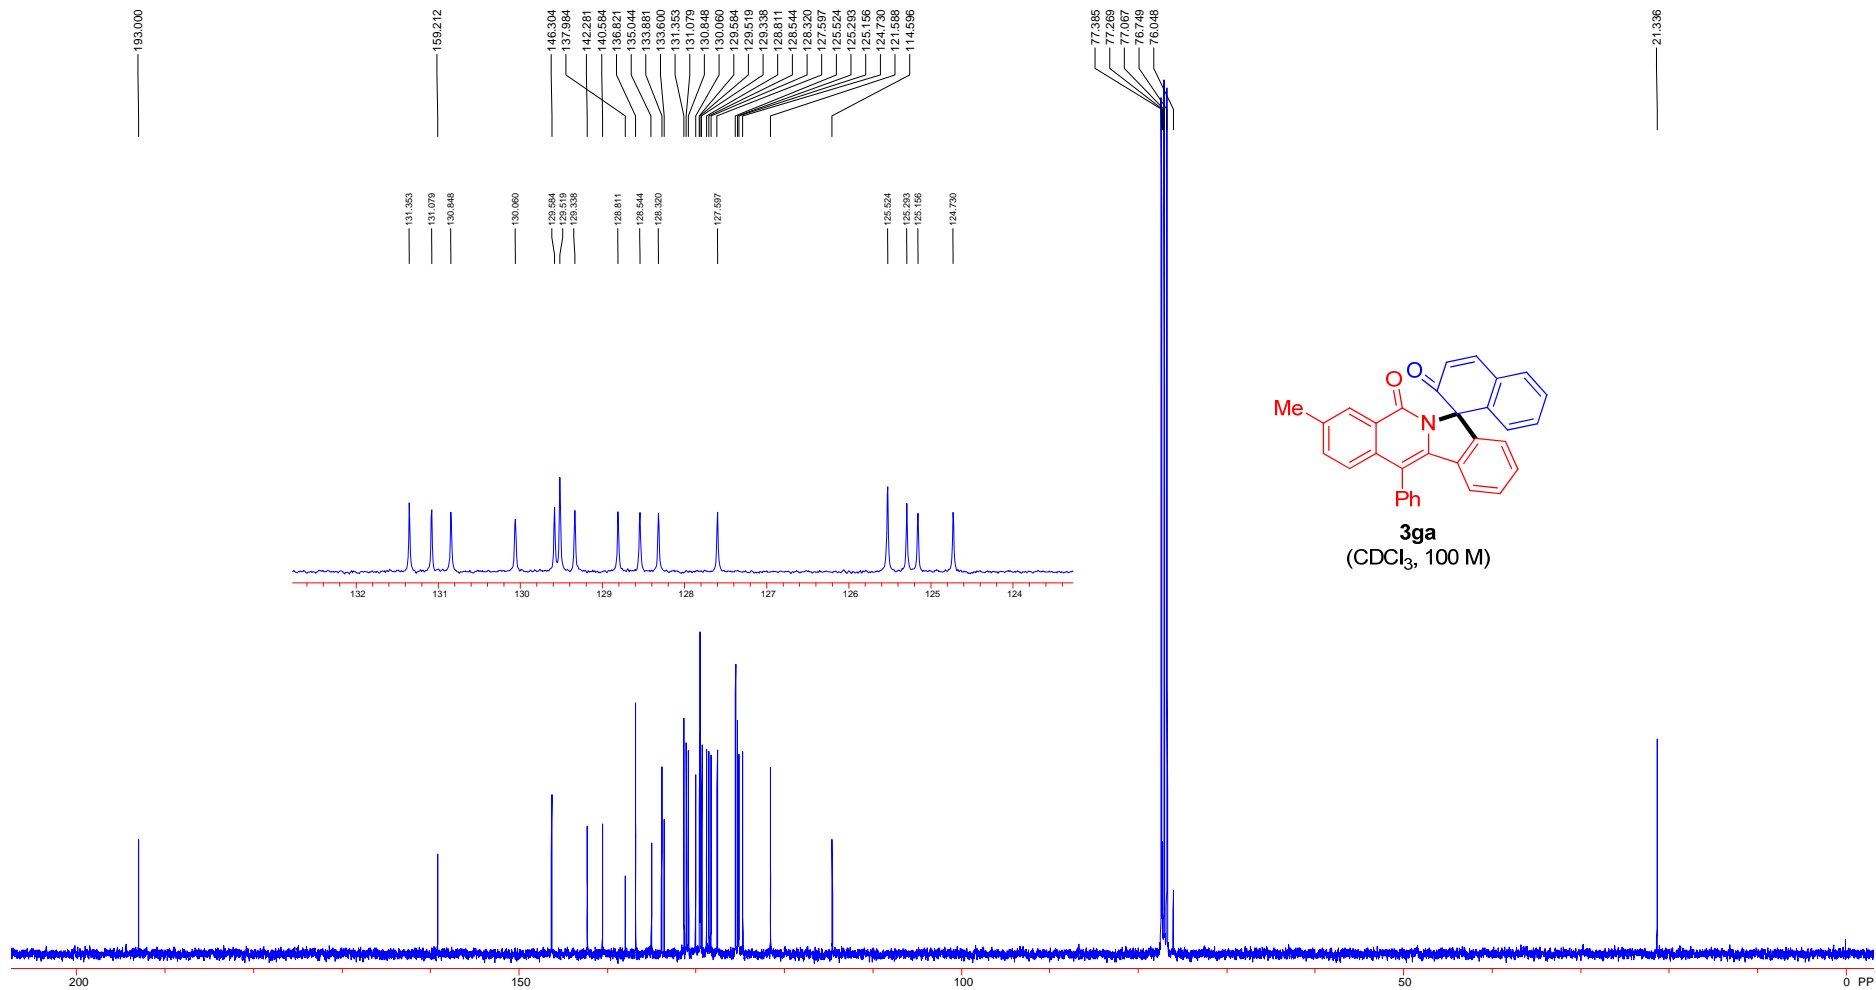

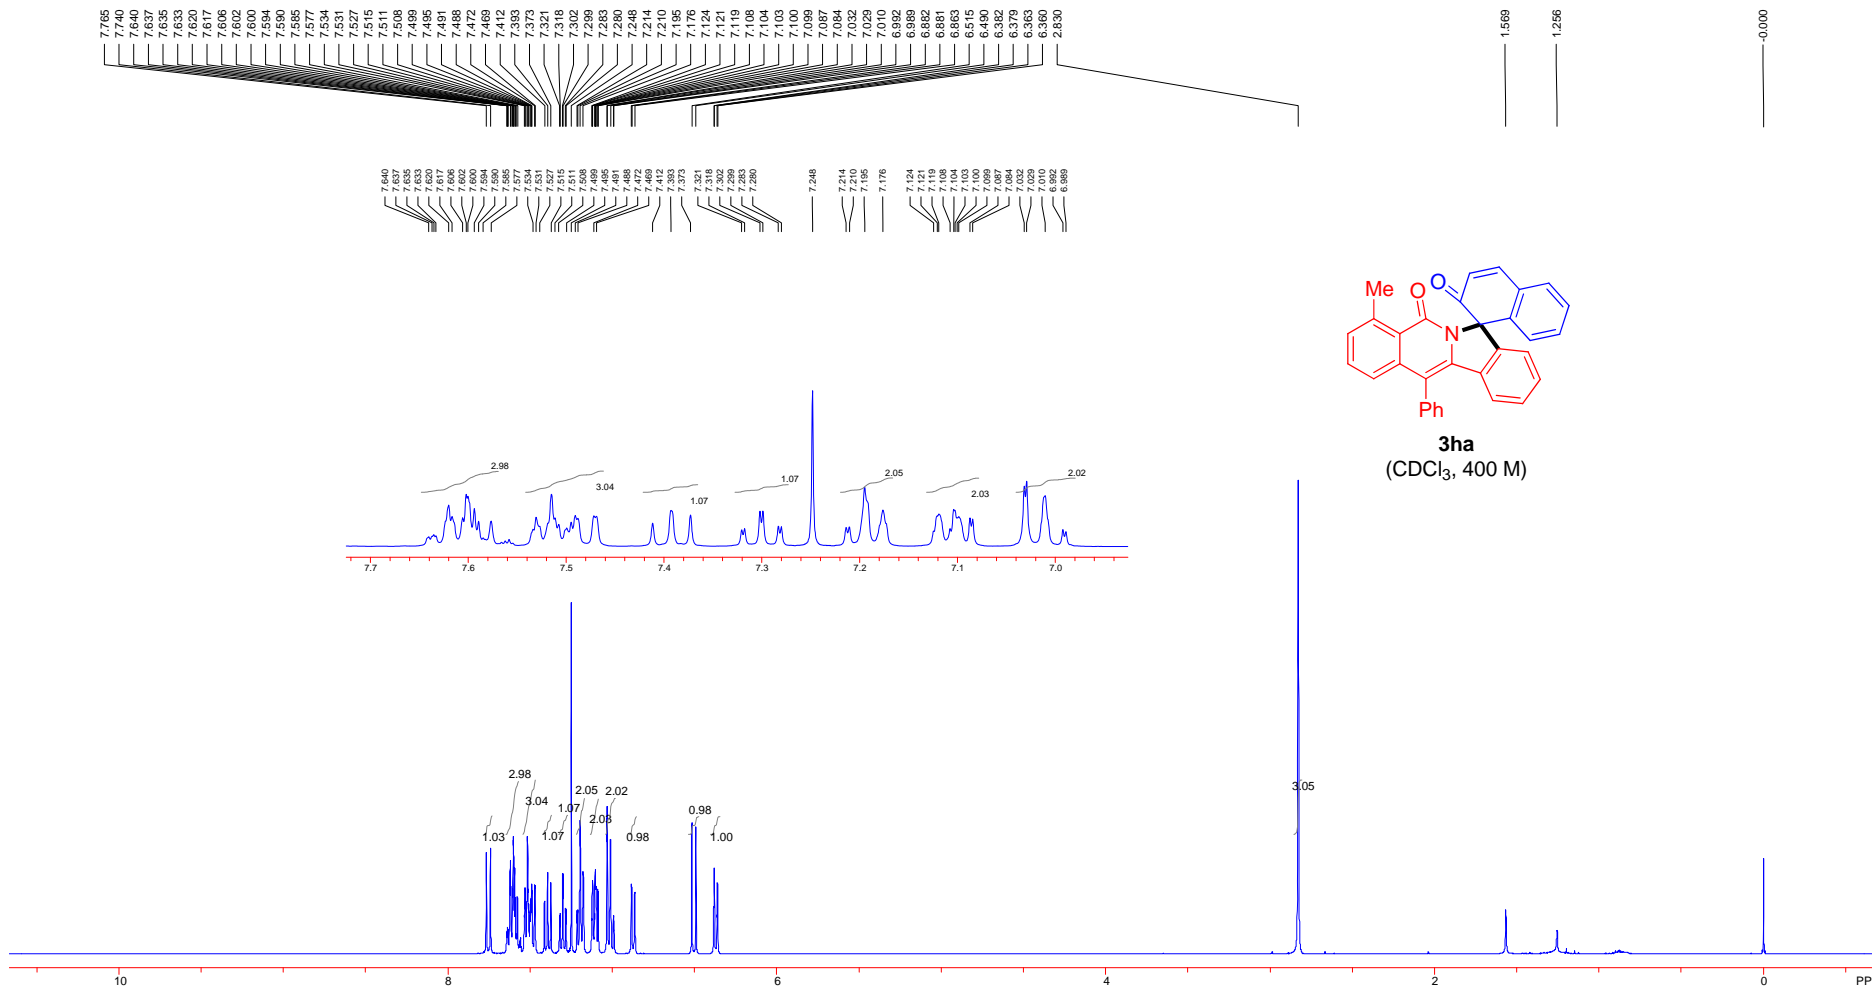

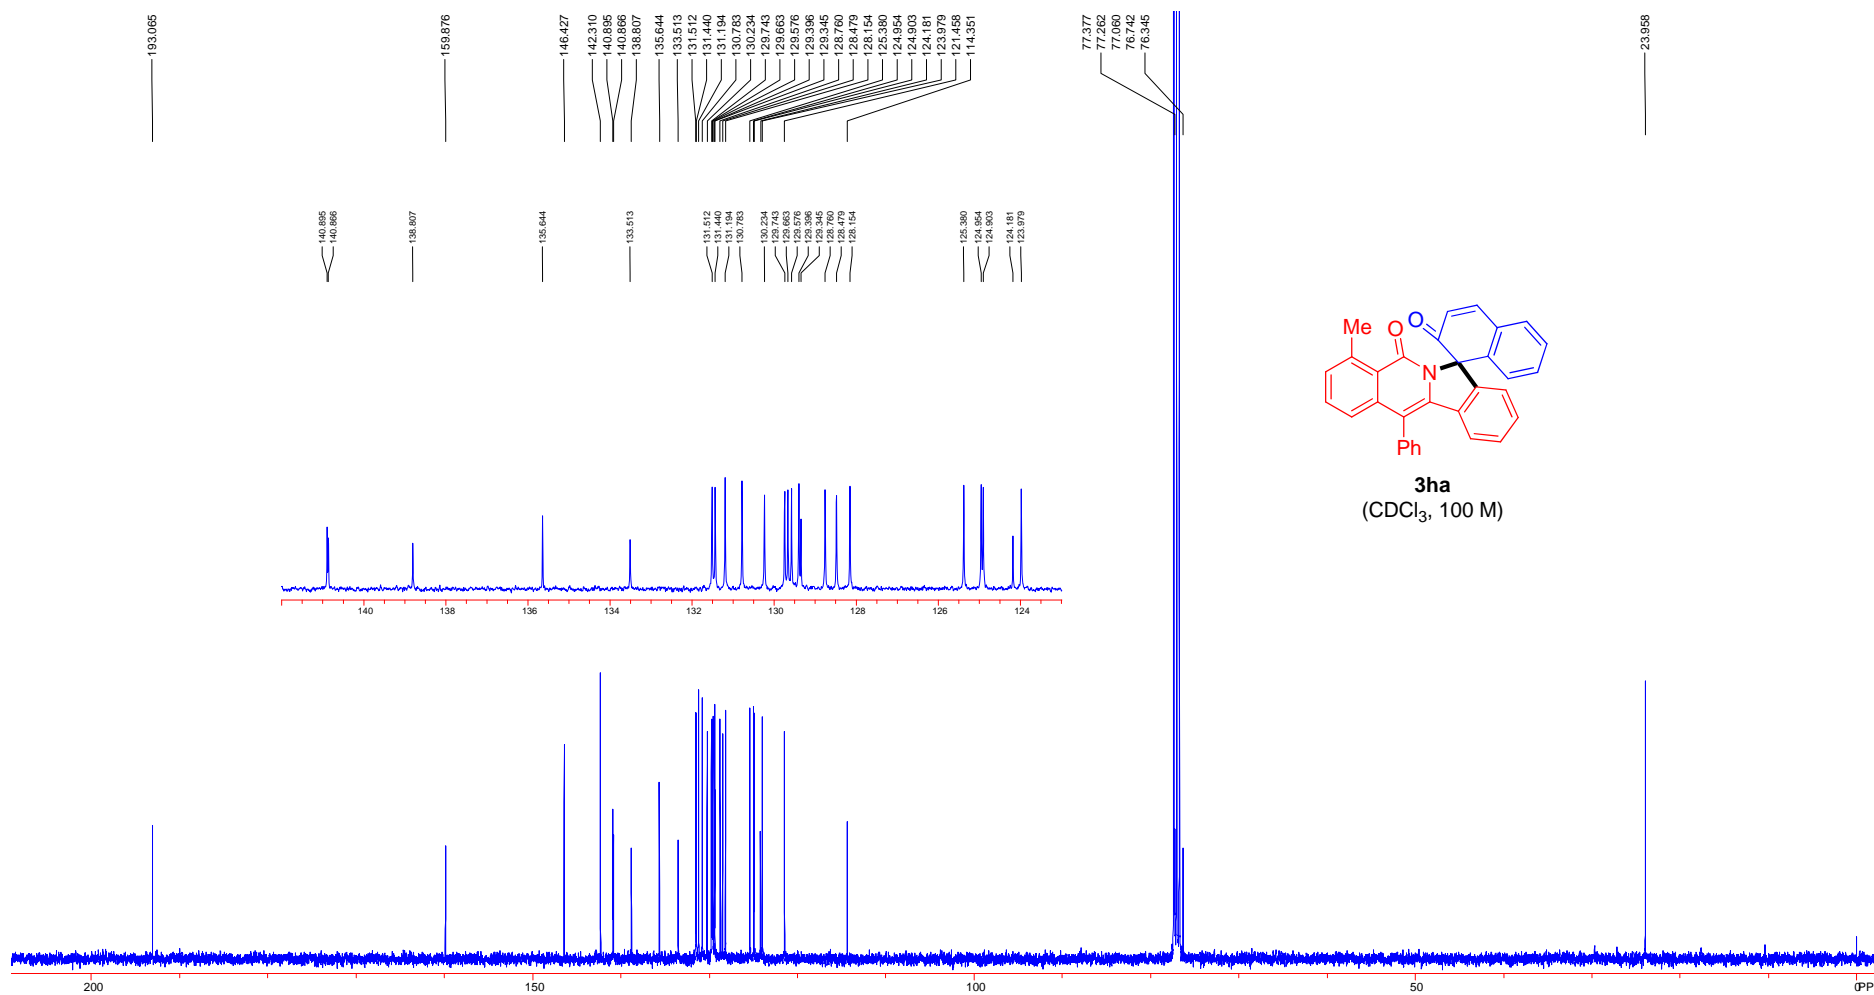

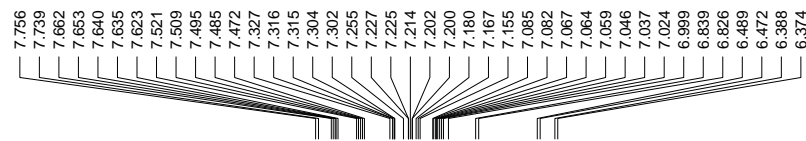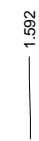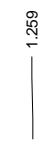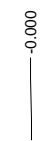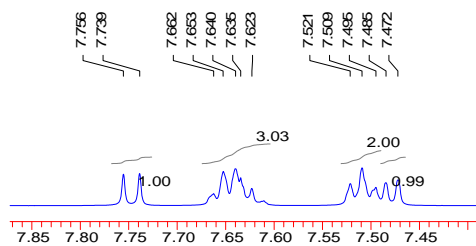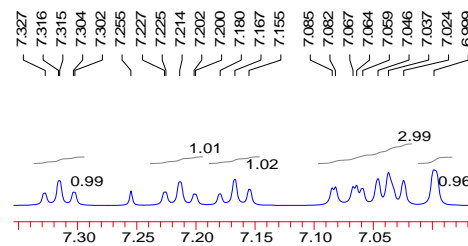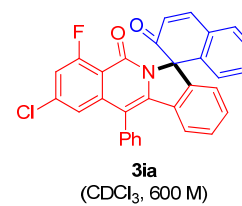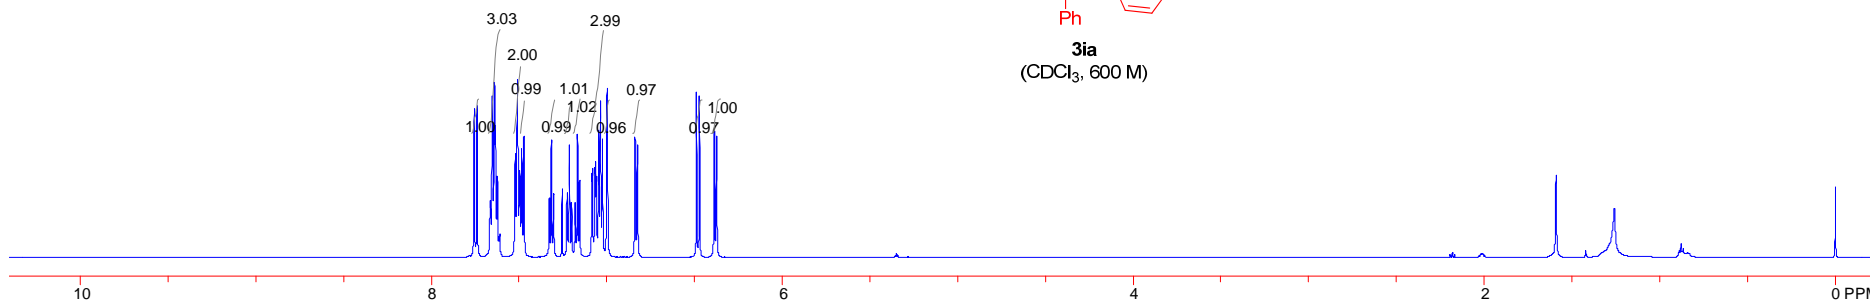

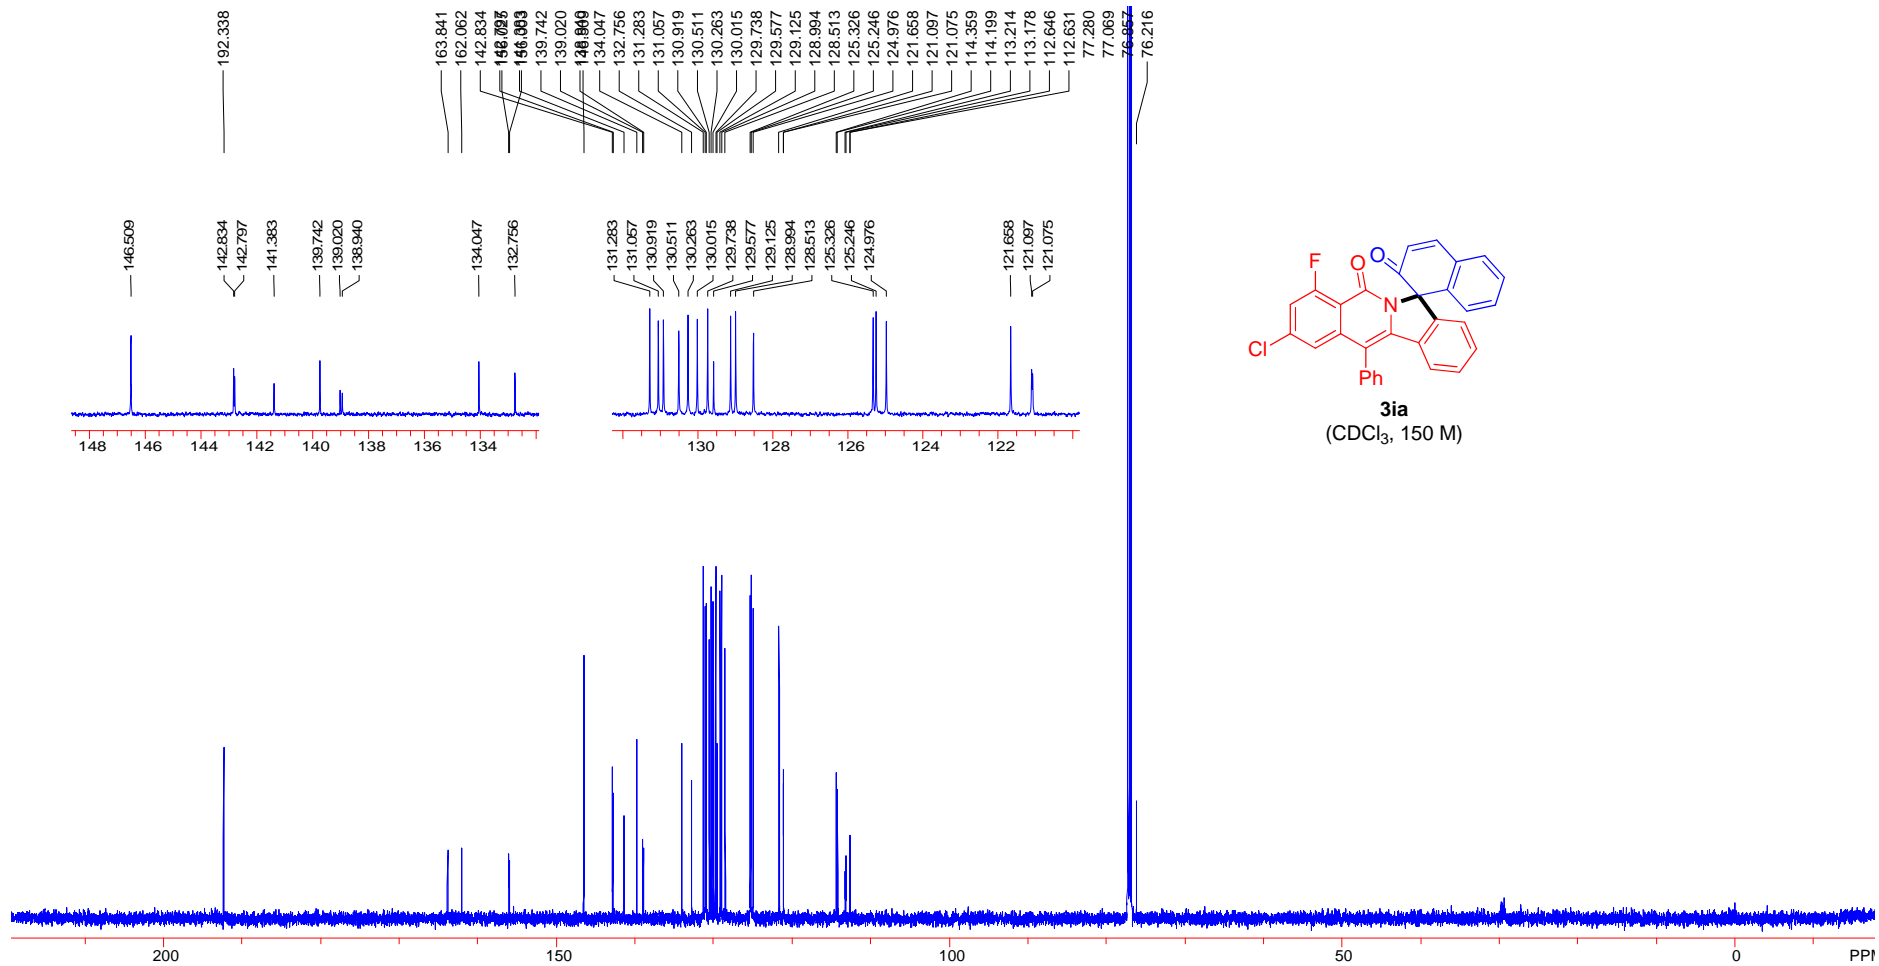

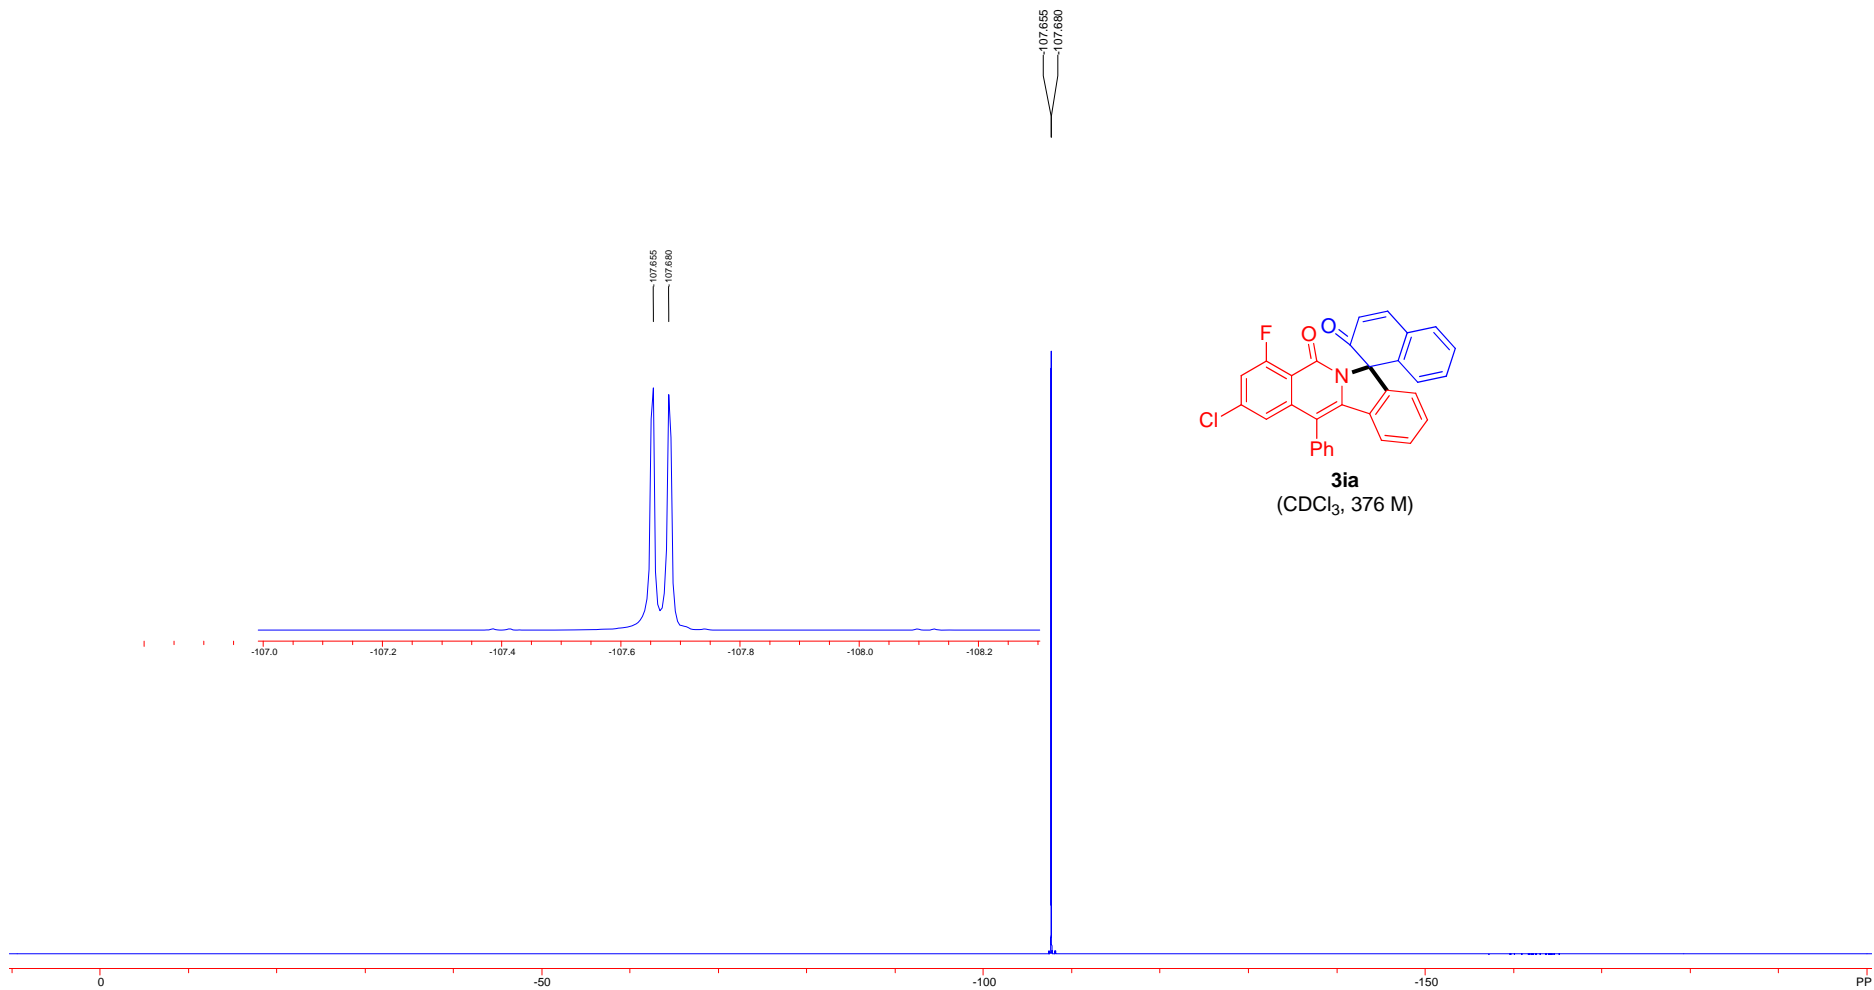

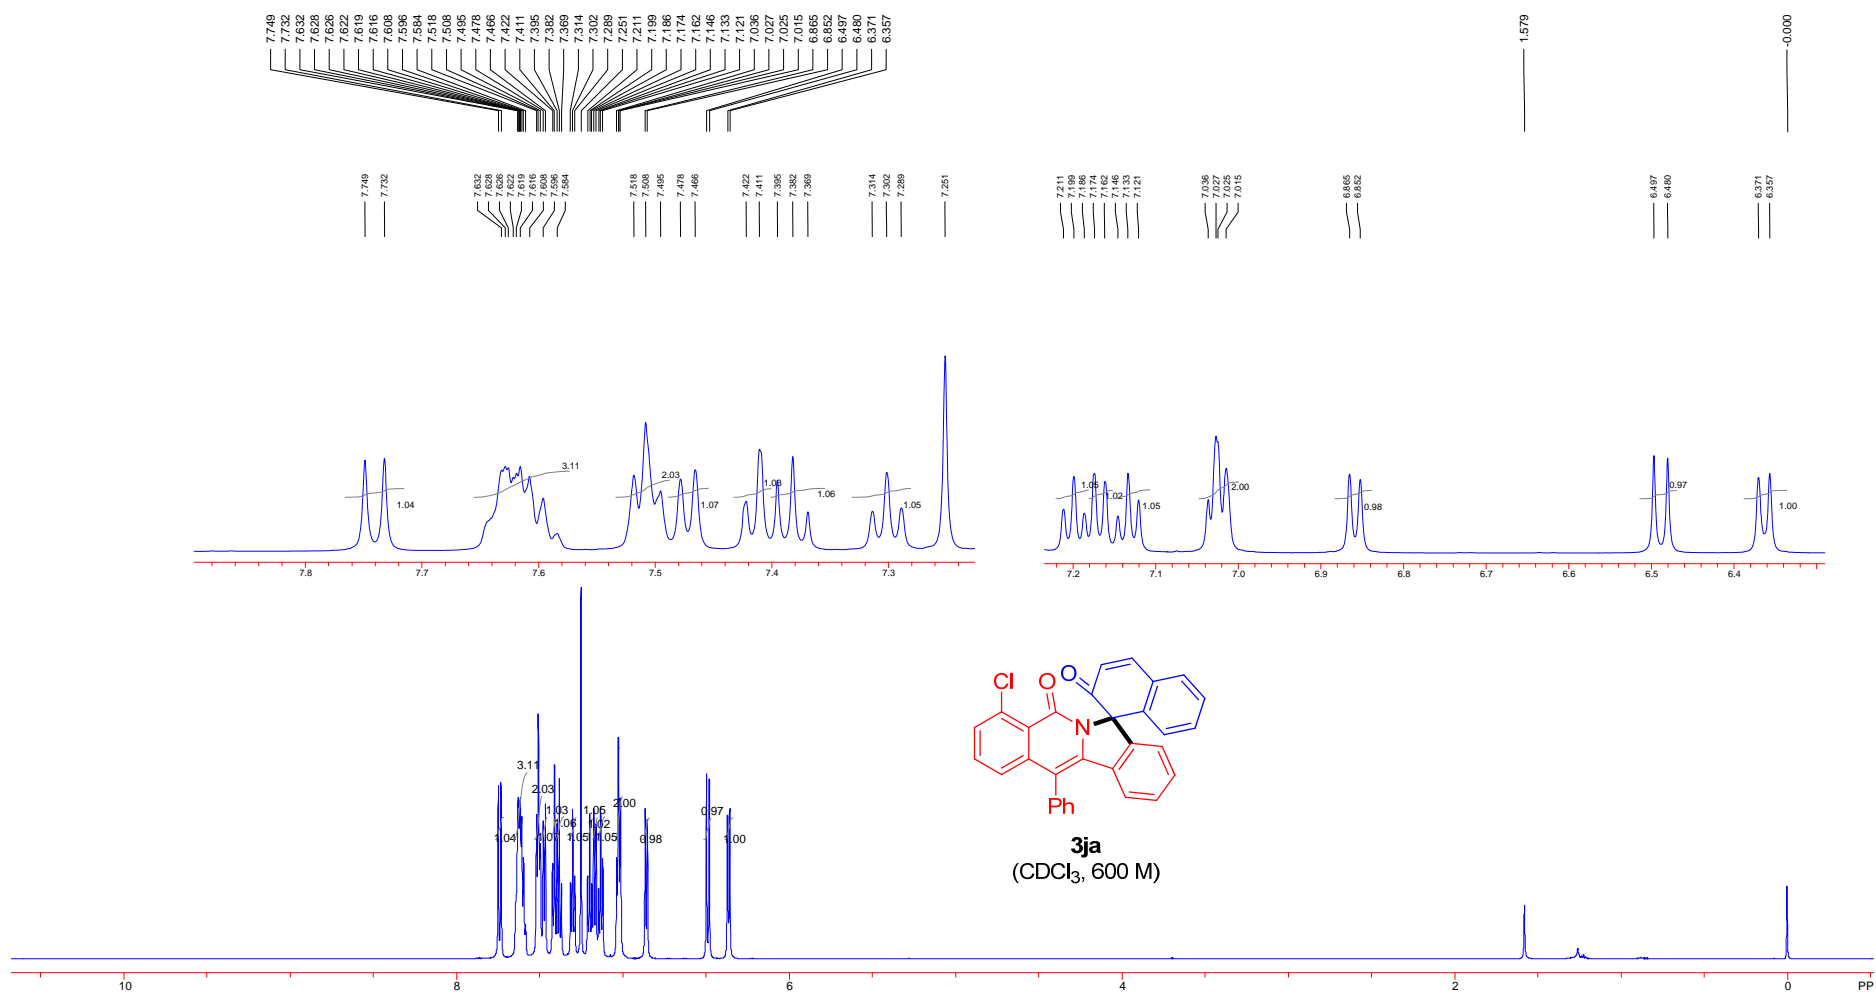



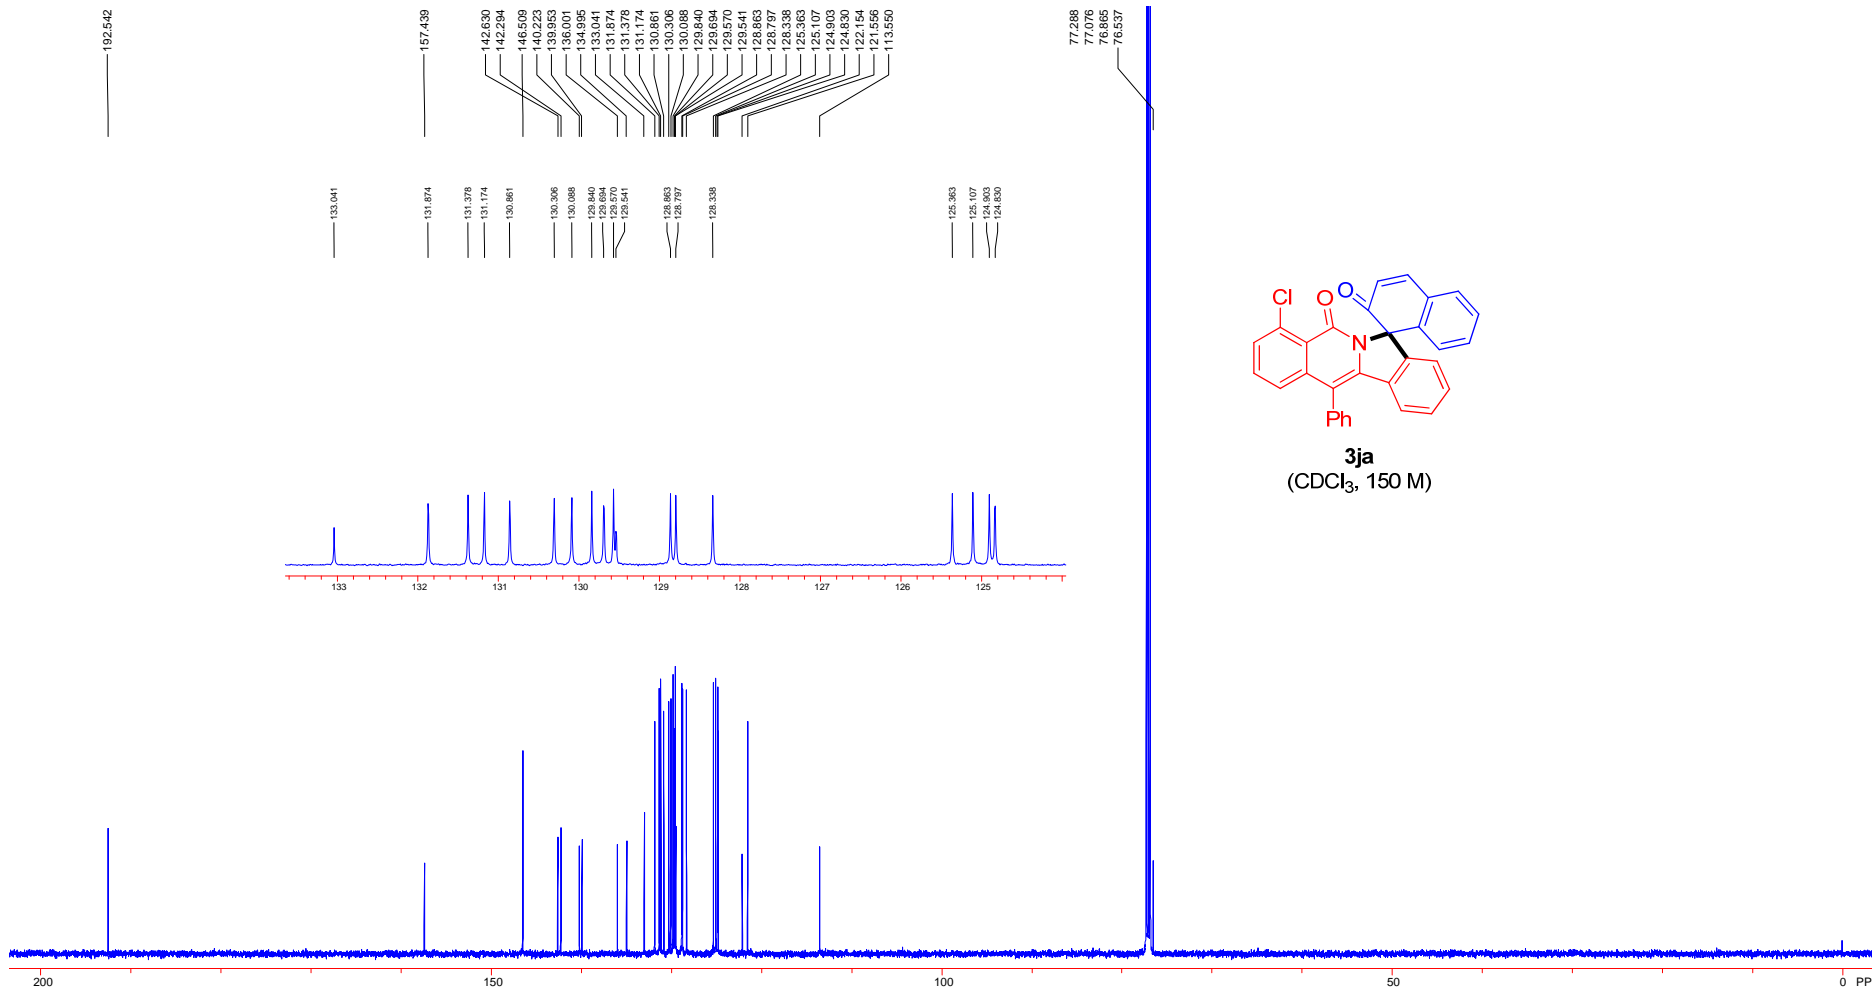

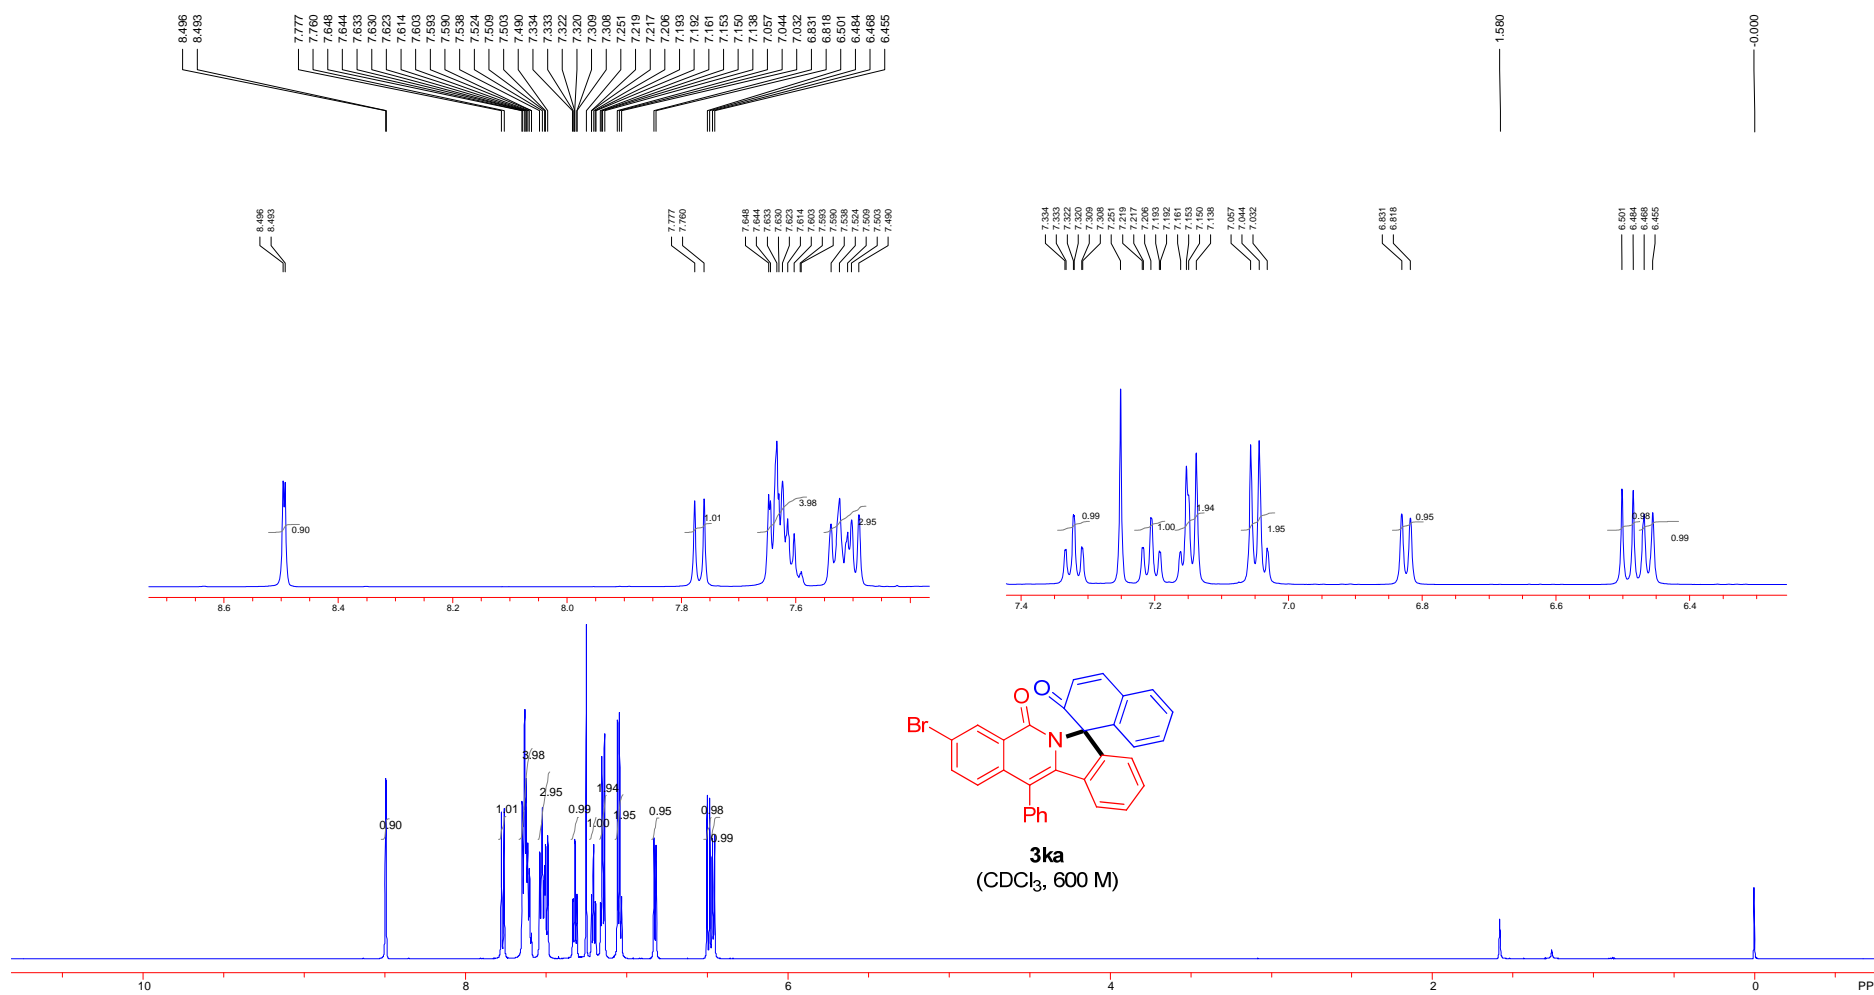

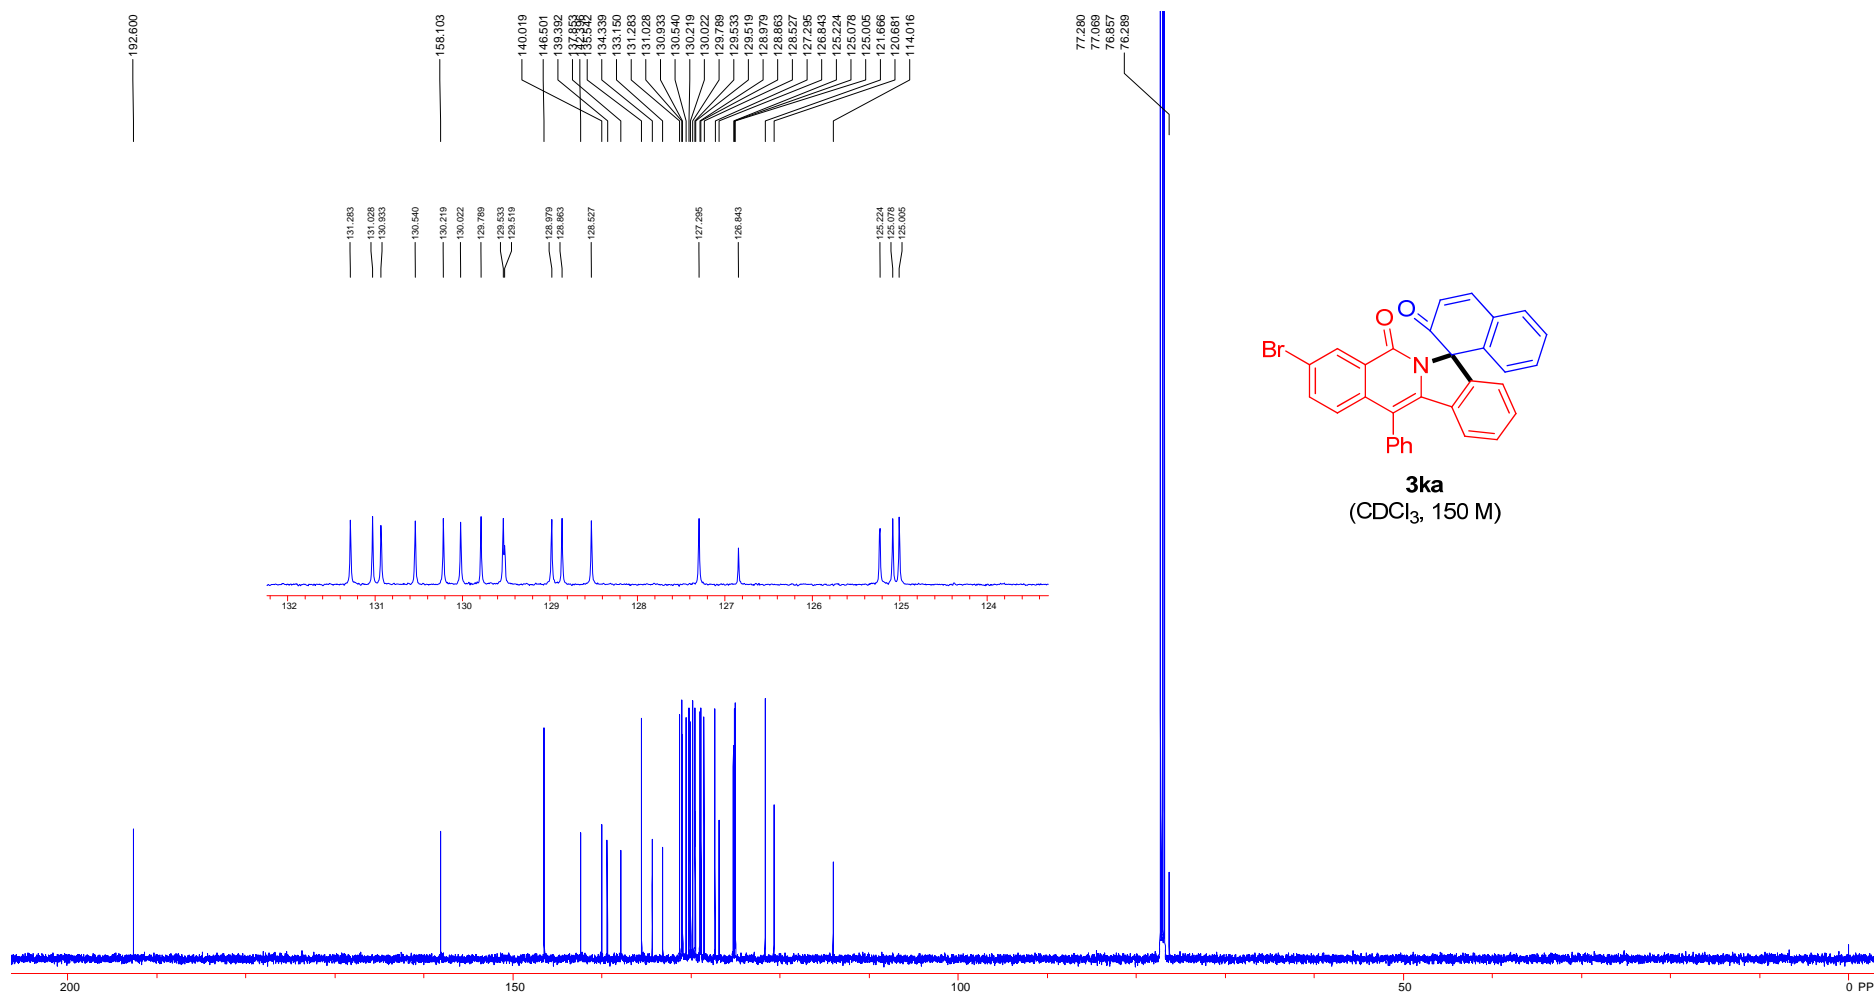

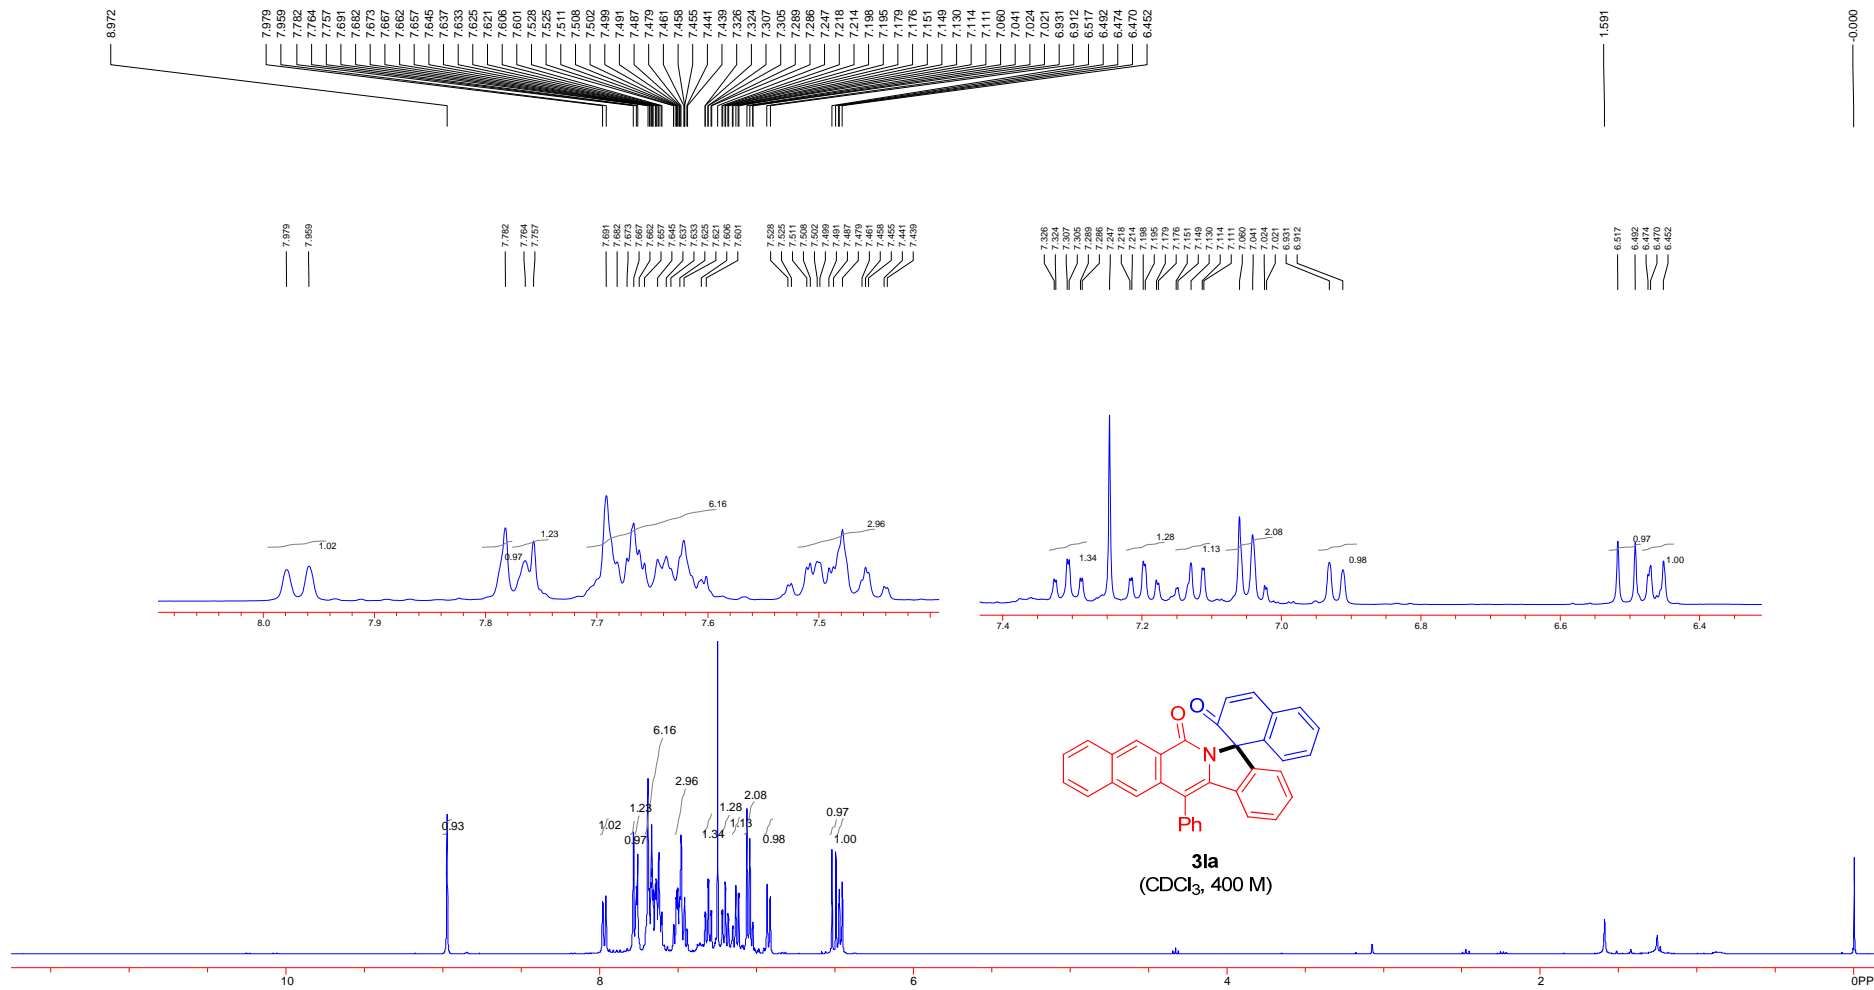

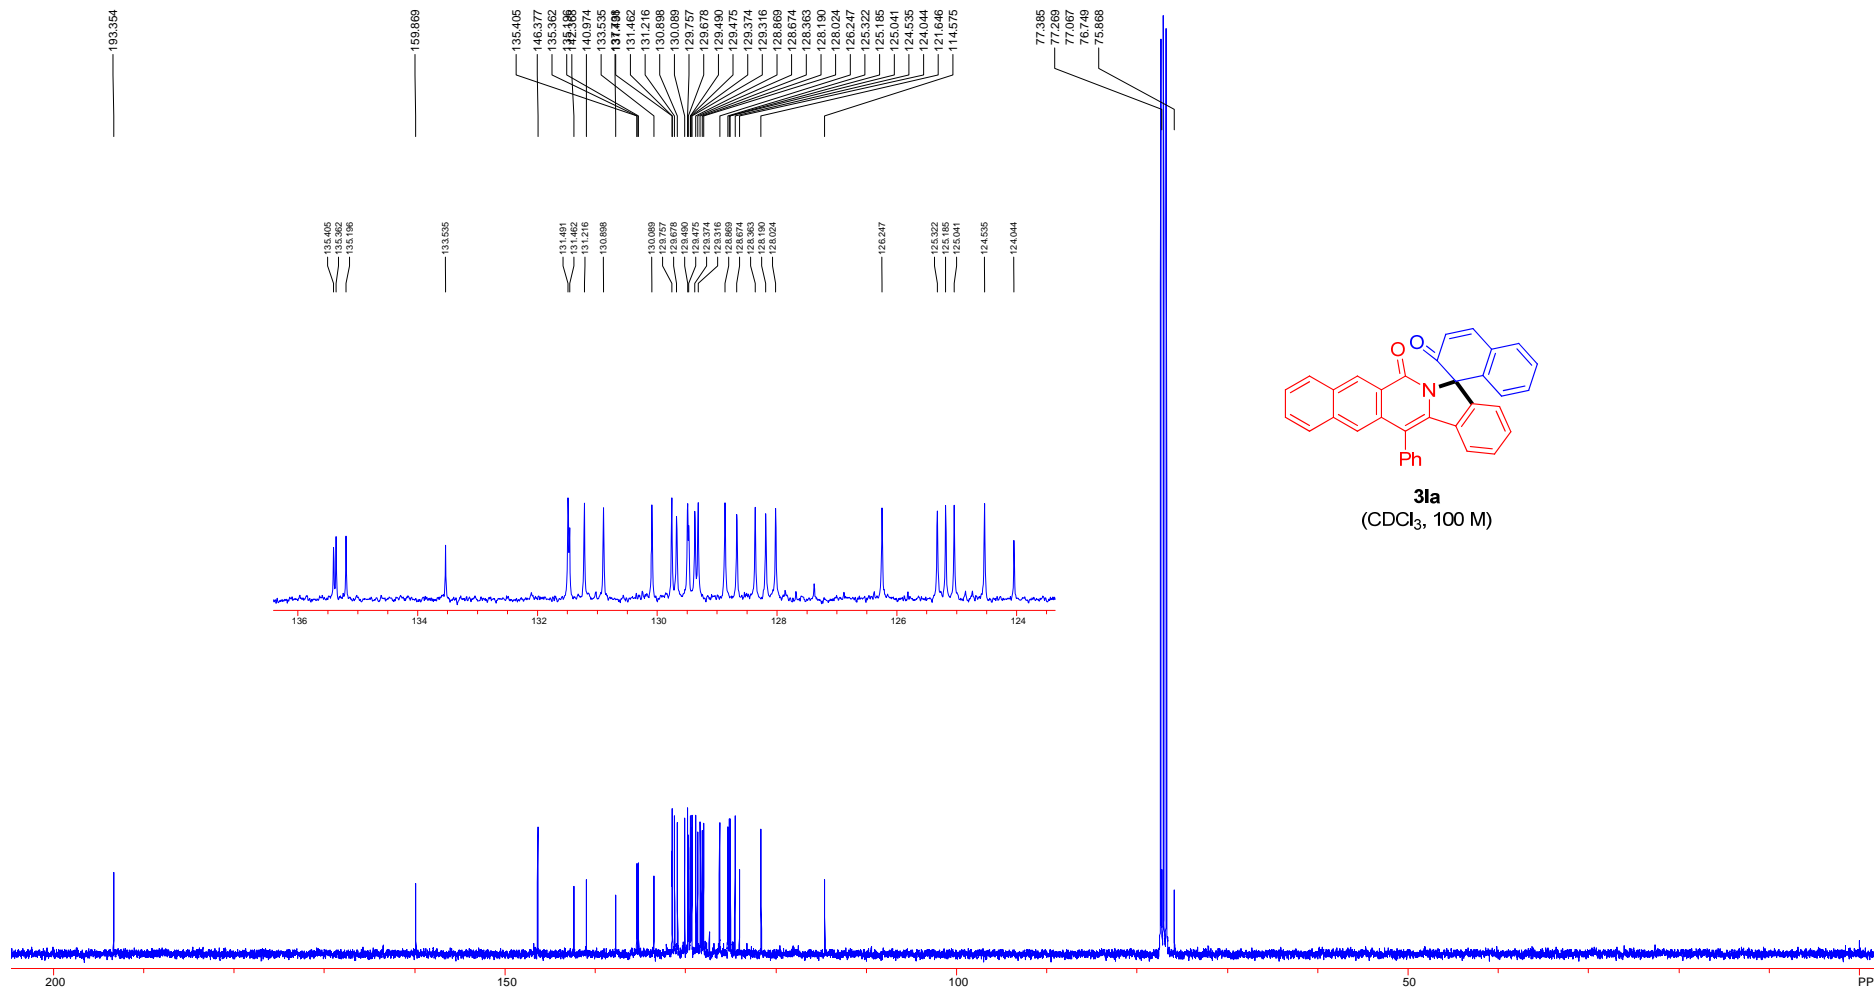

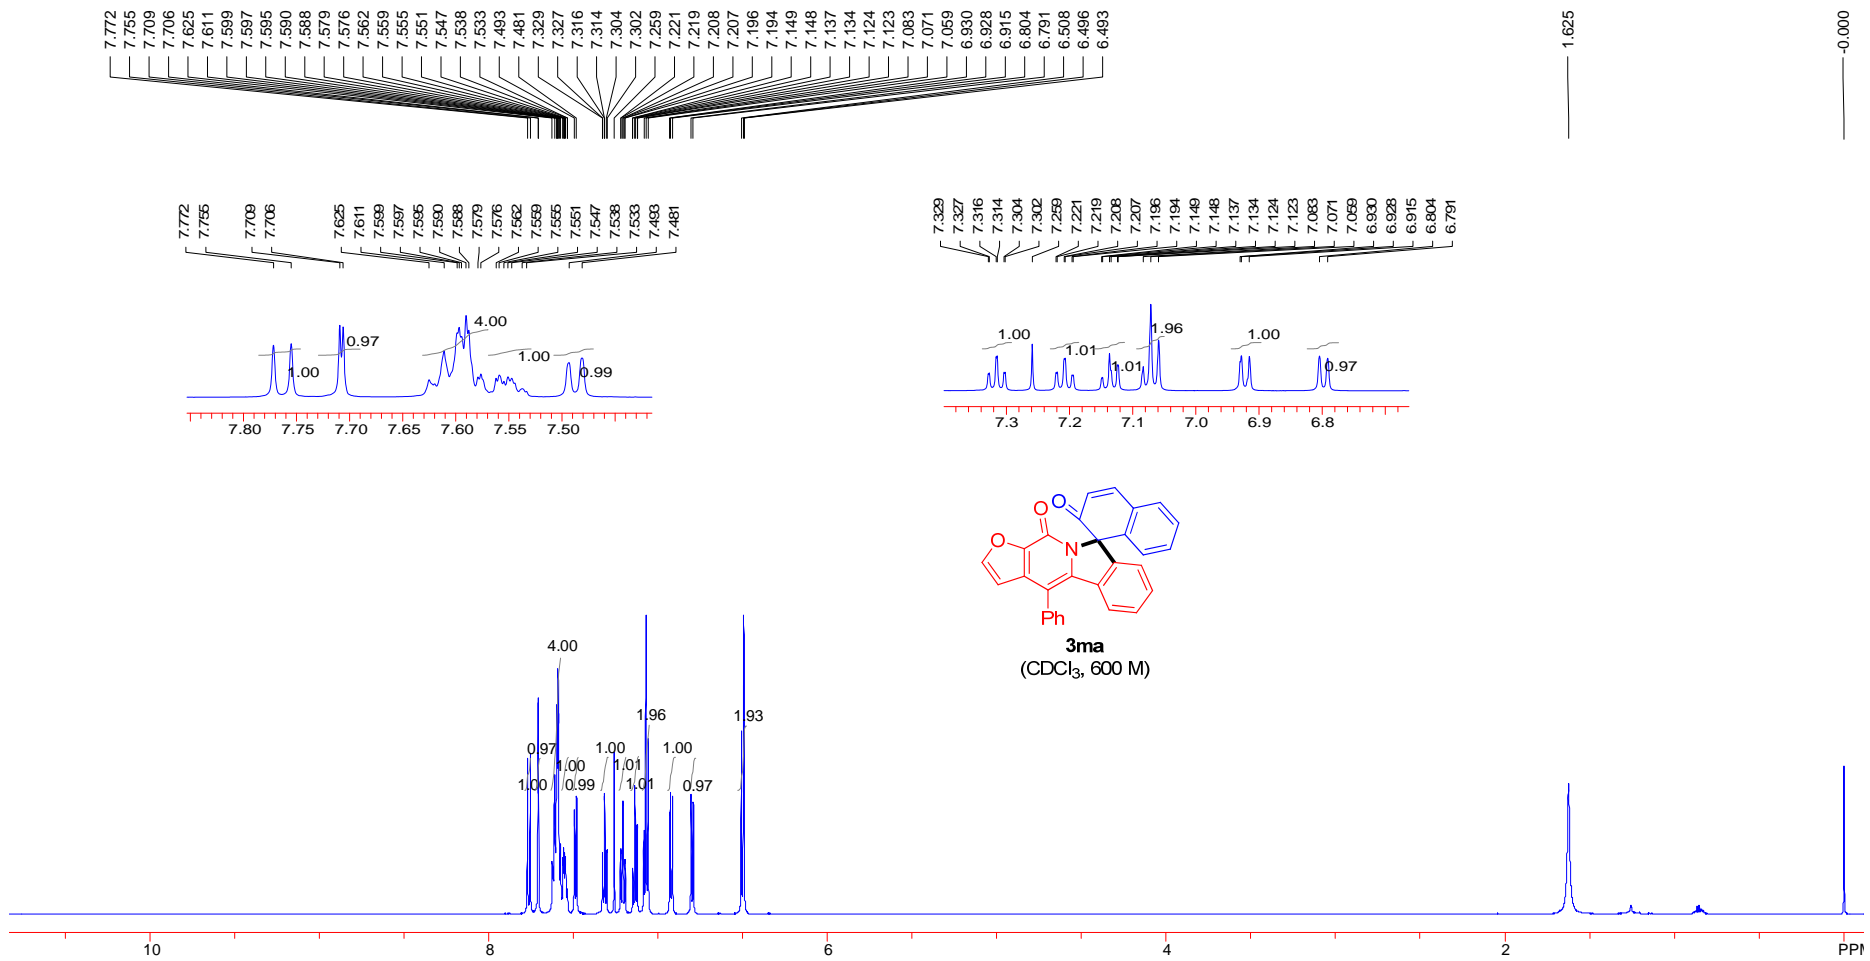

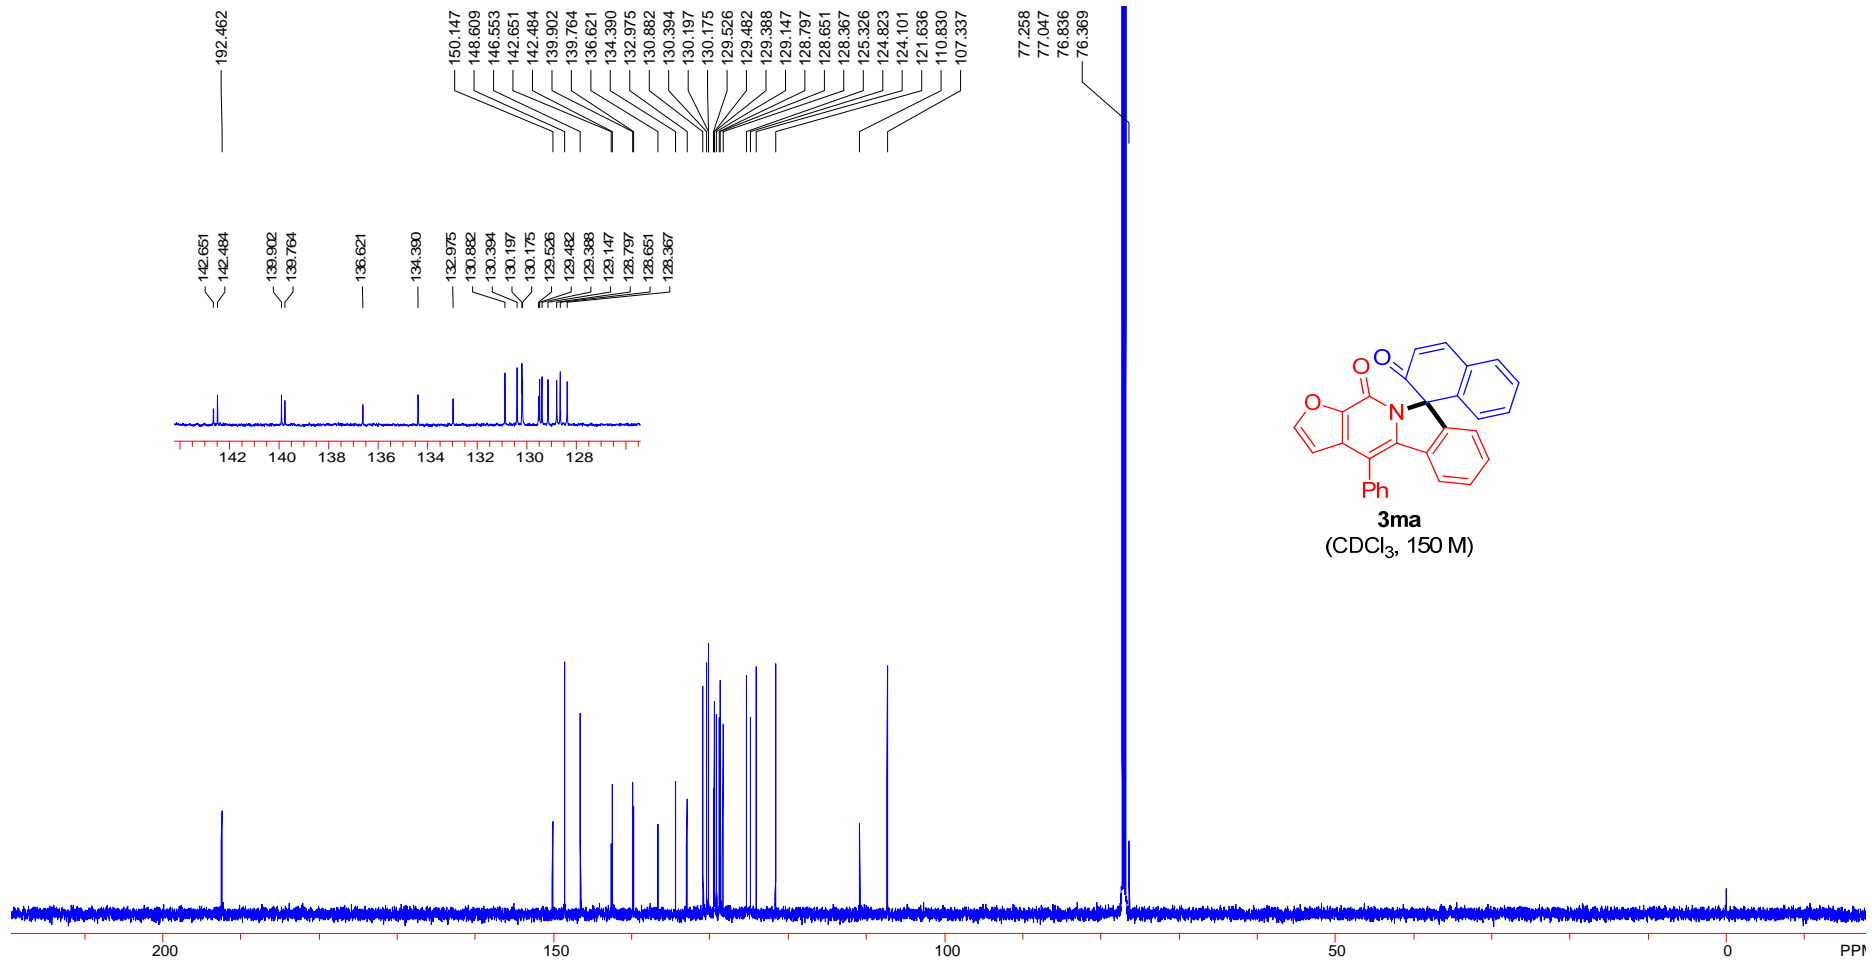

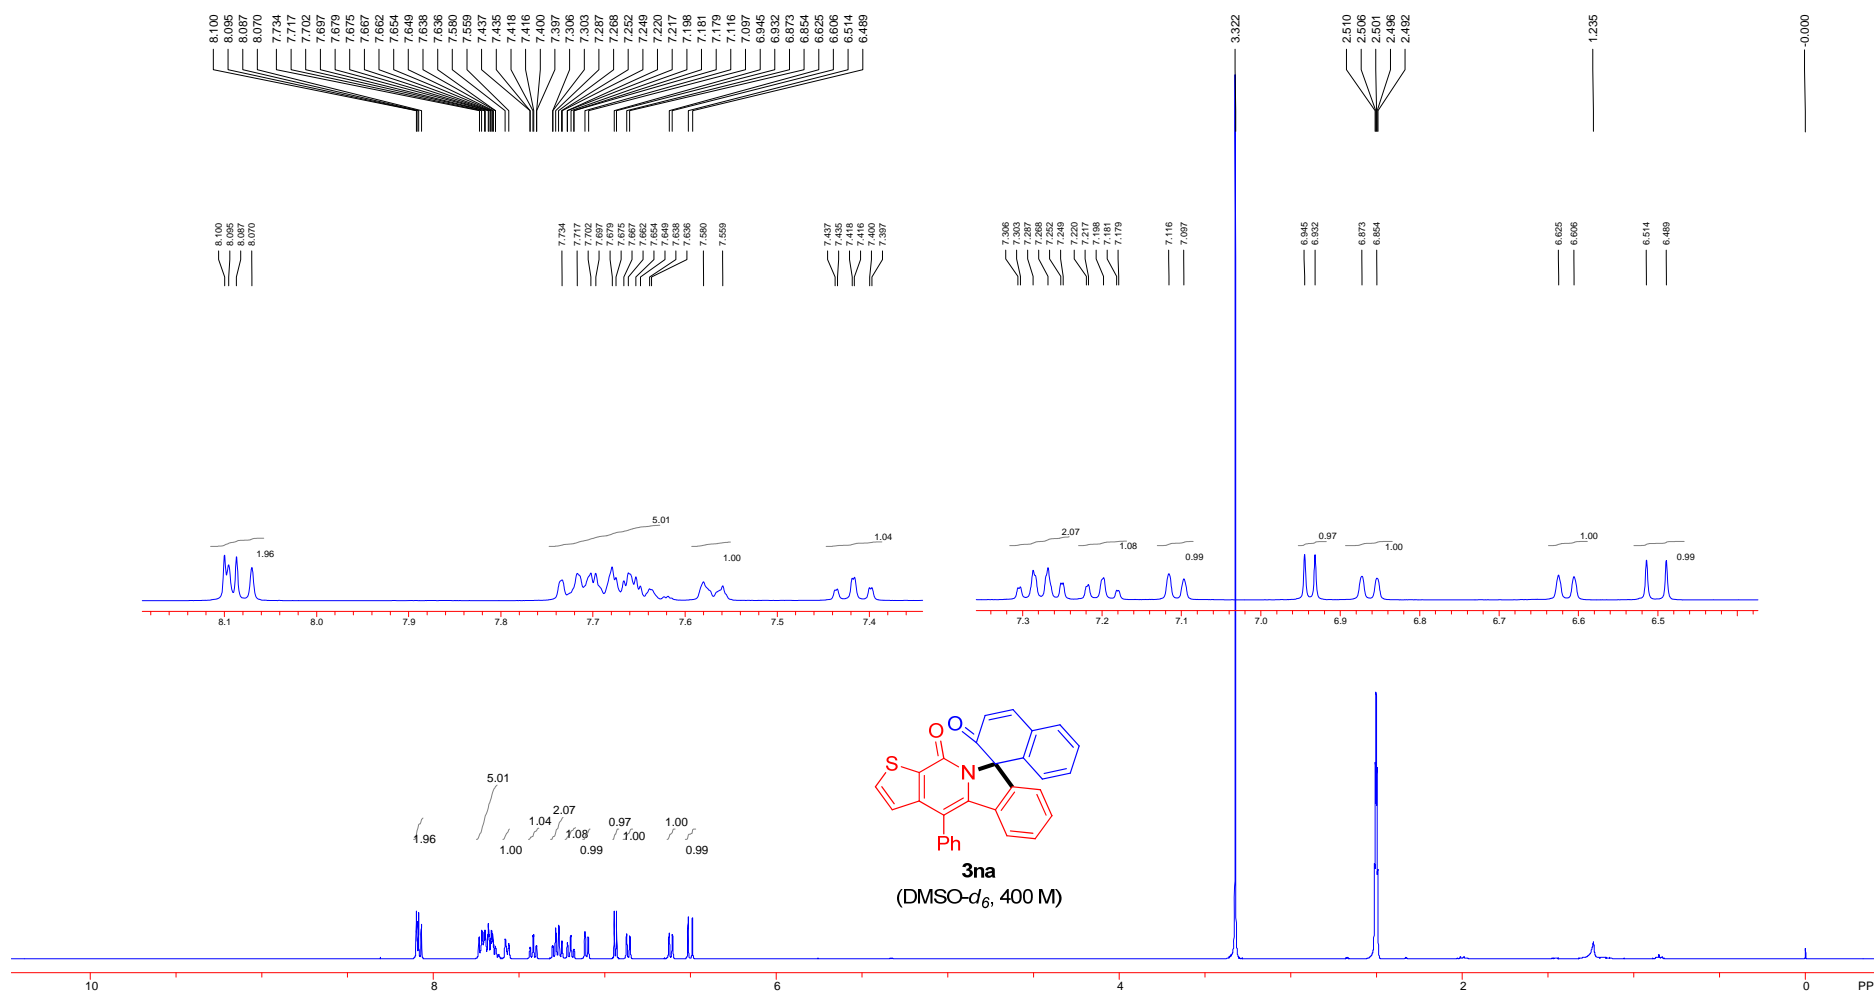



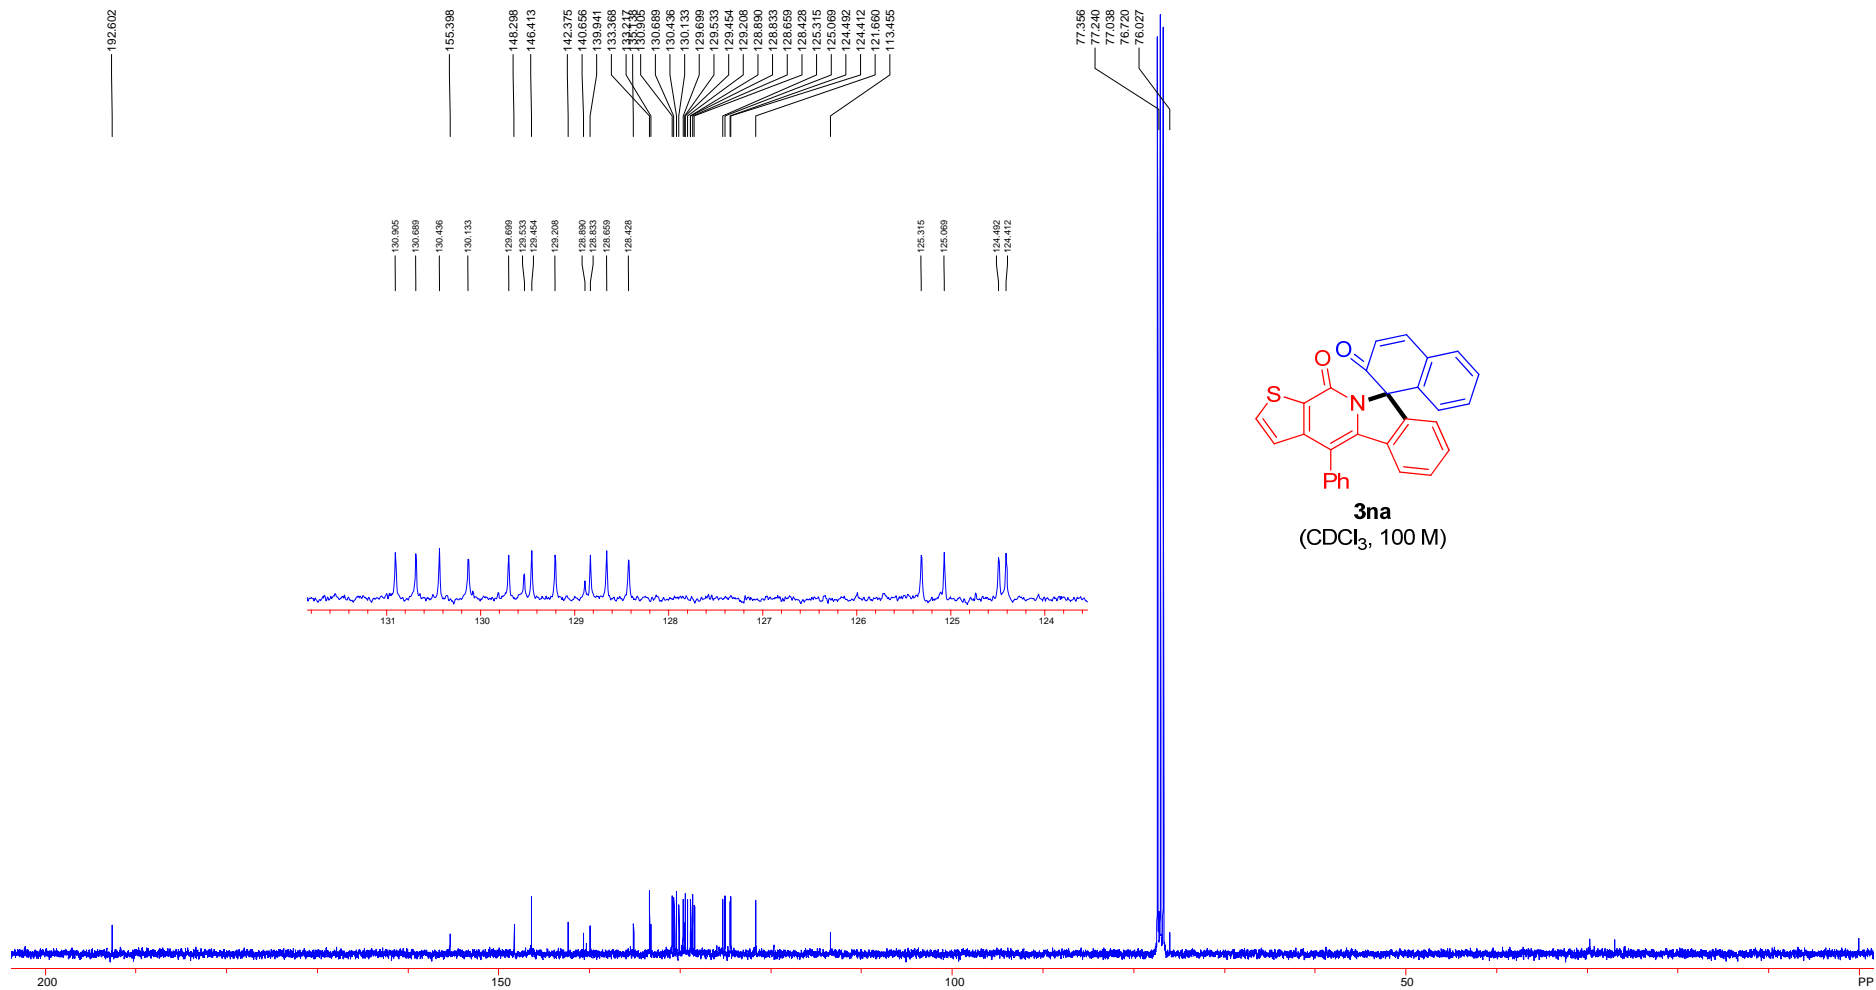

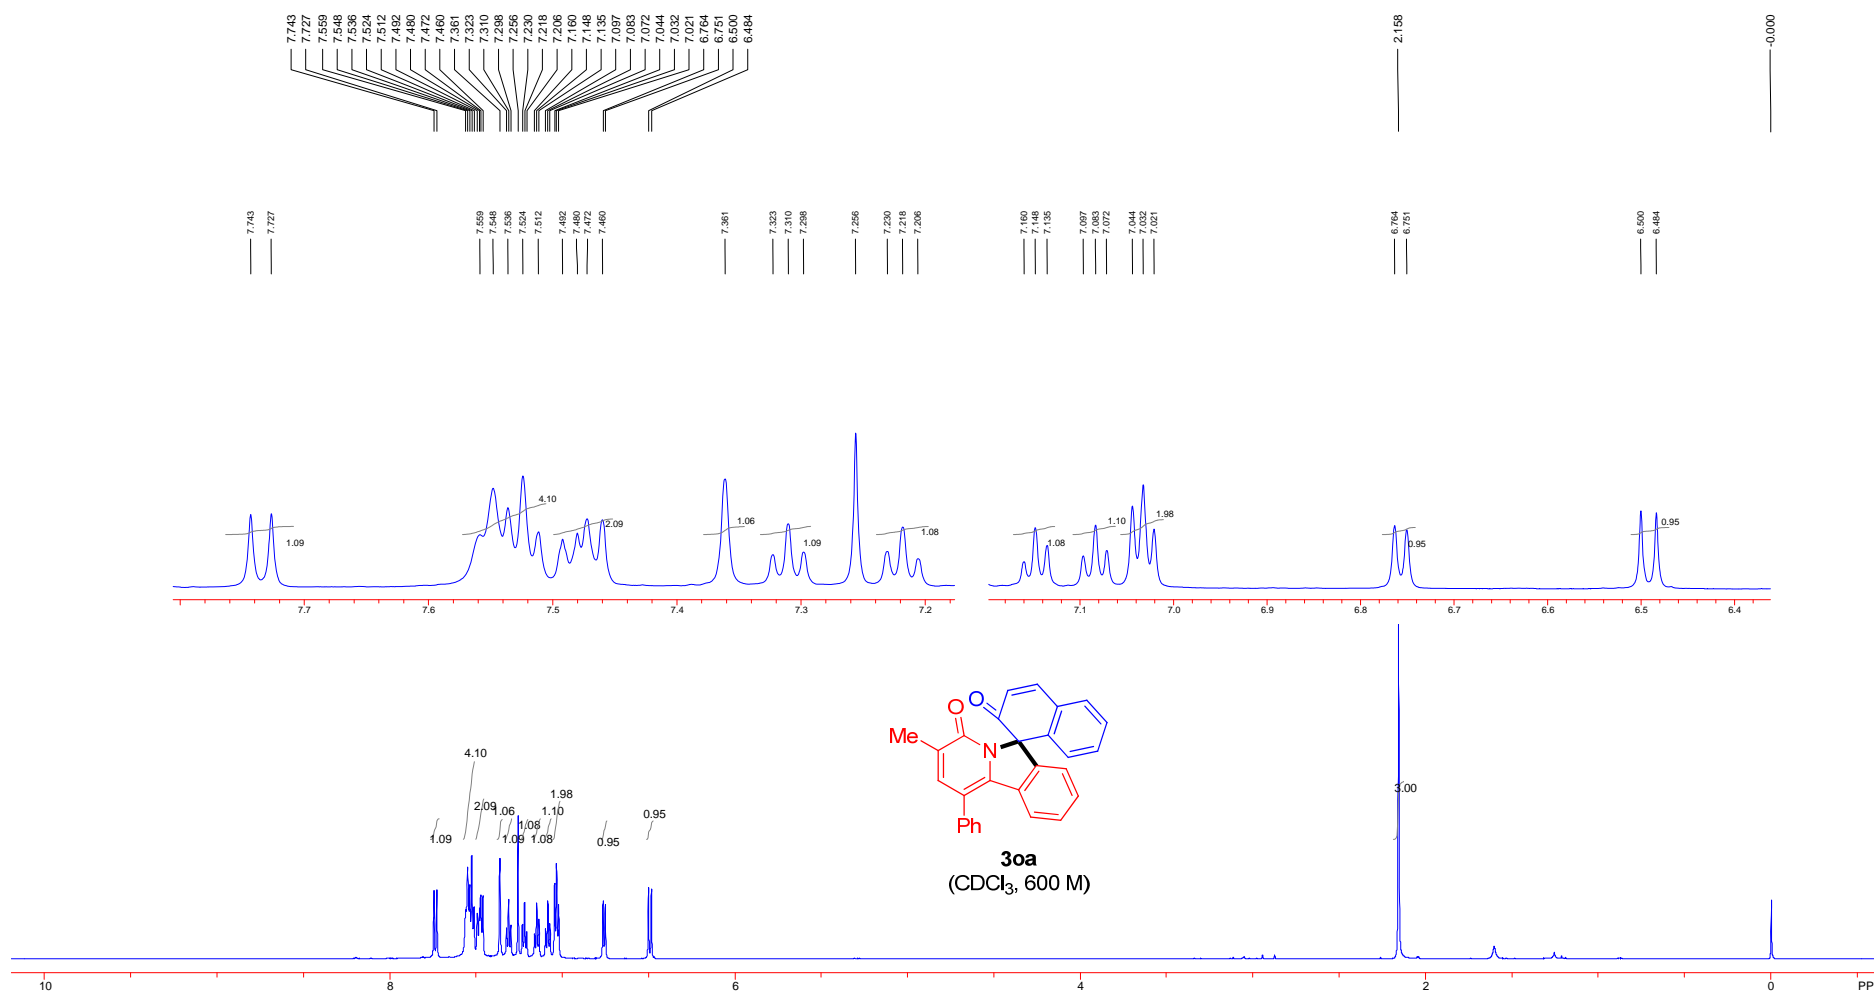

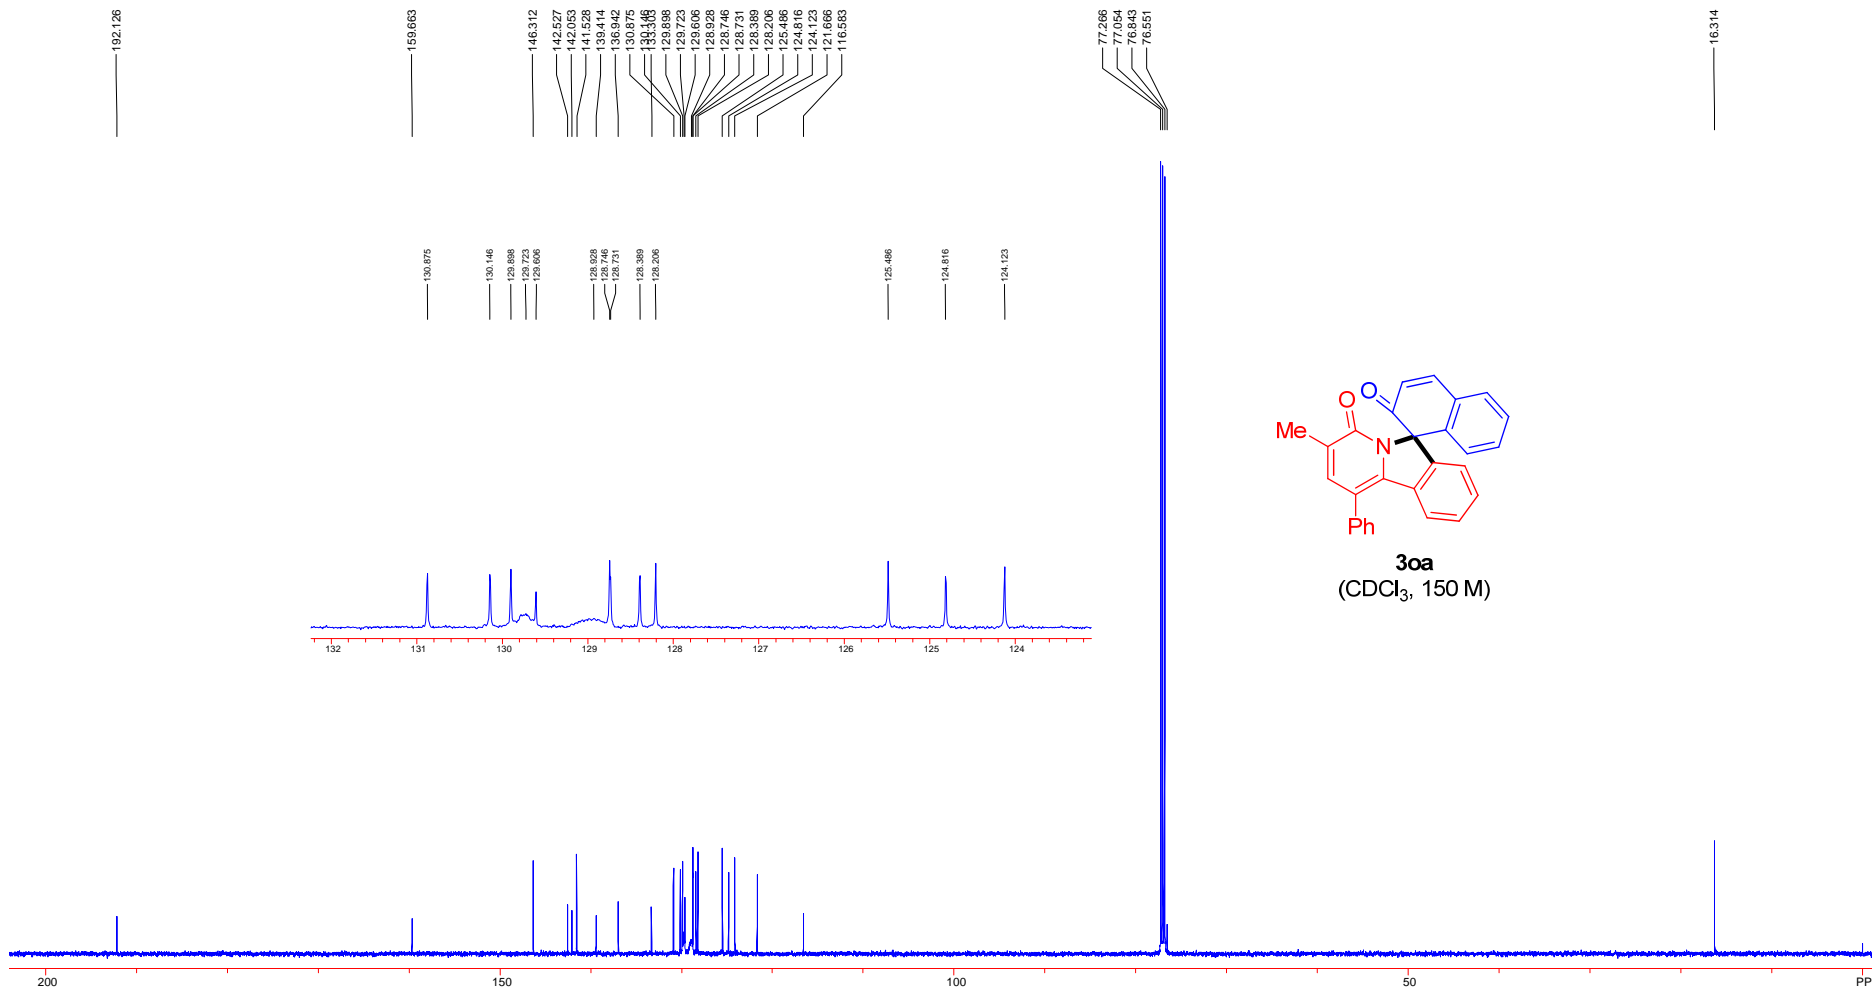

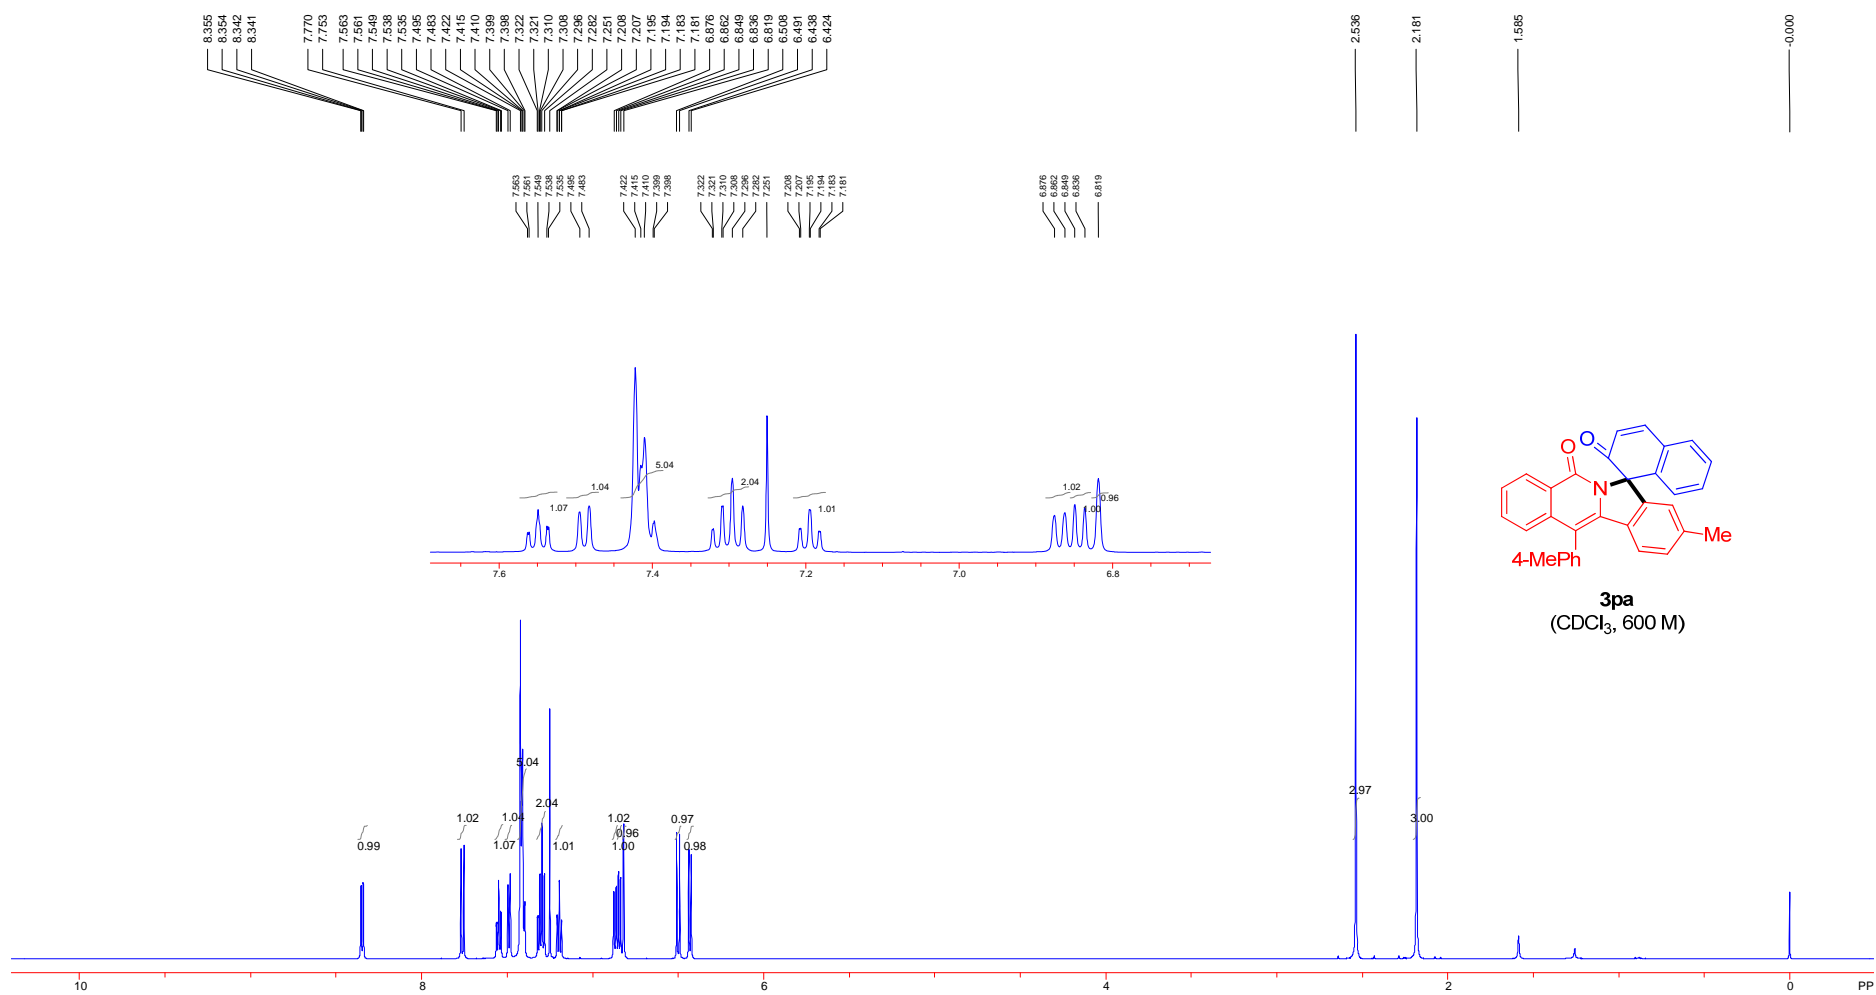

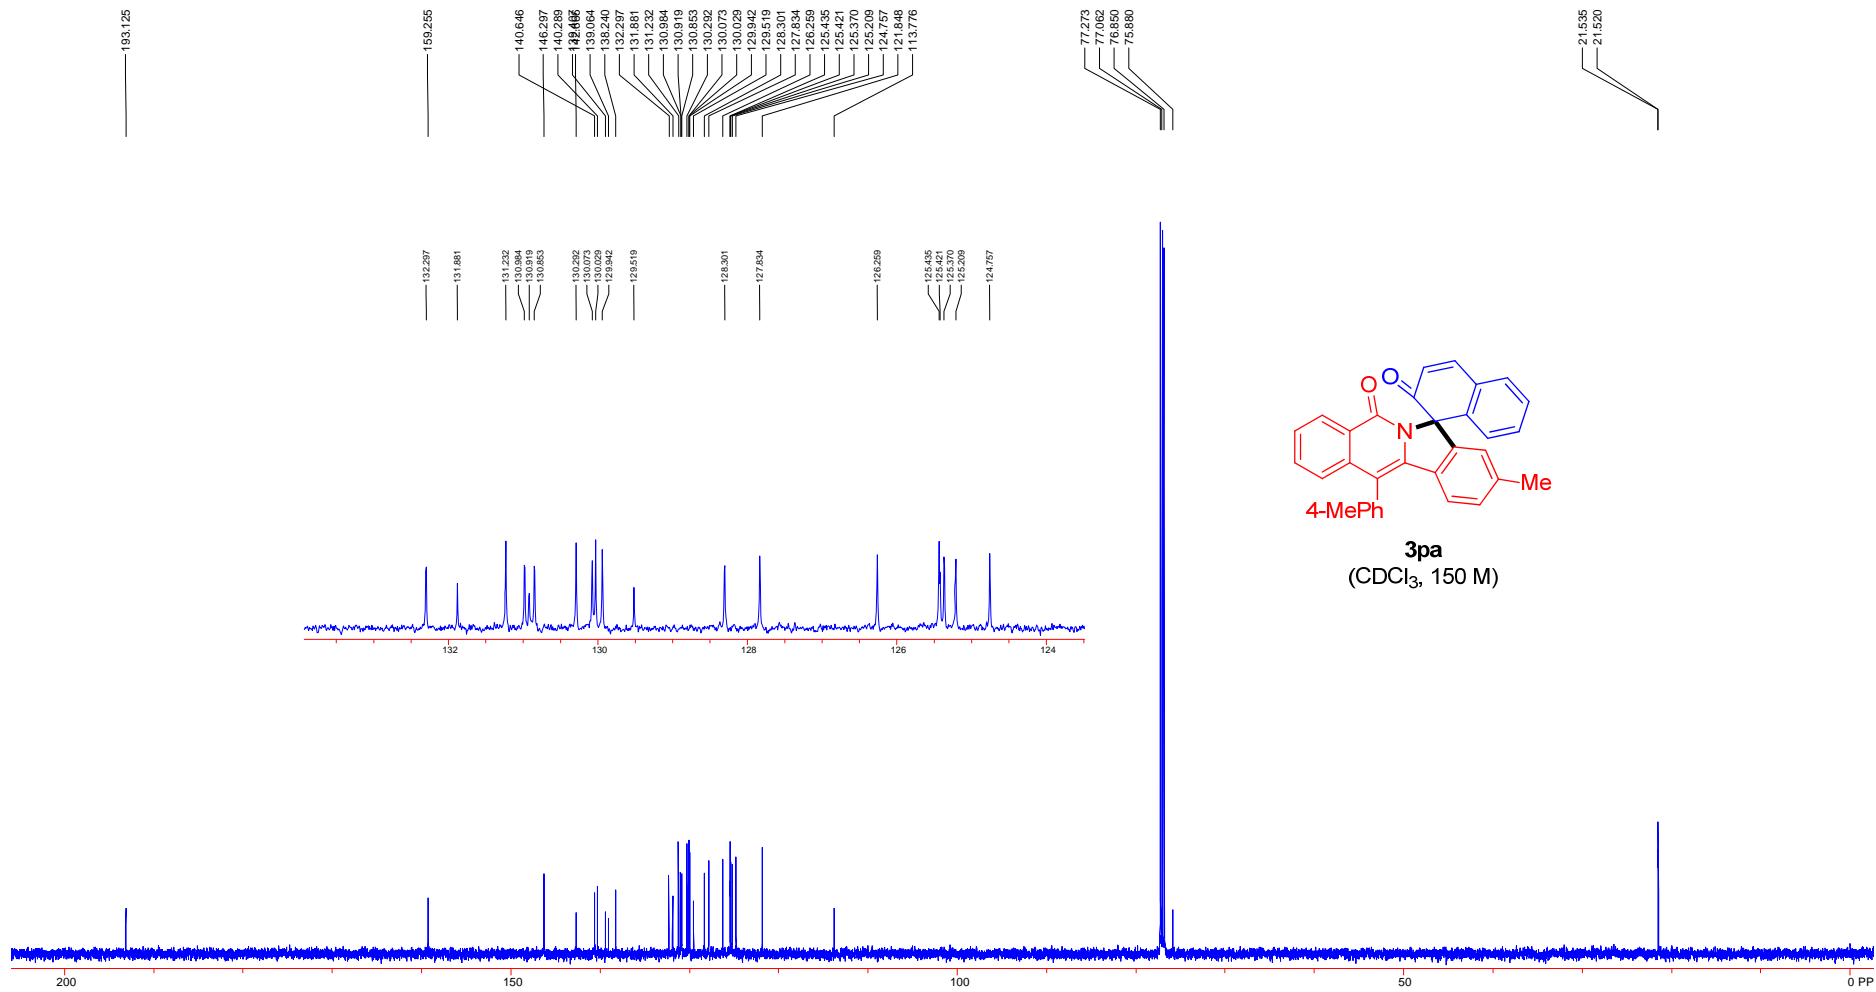

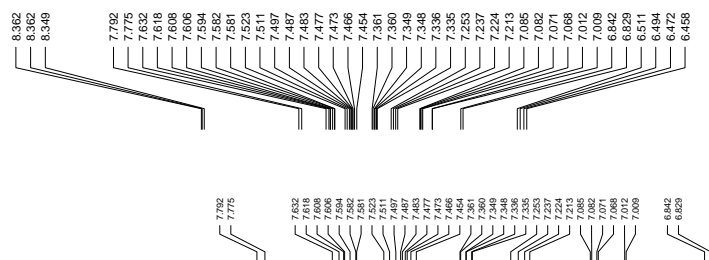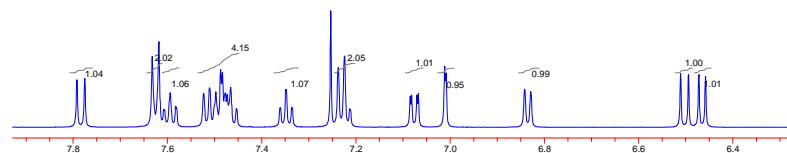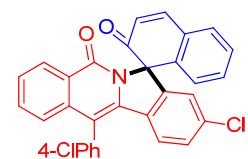

**3qa**  
(CDCl<sub>3</sub>, 600 M)

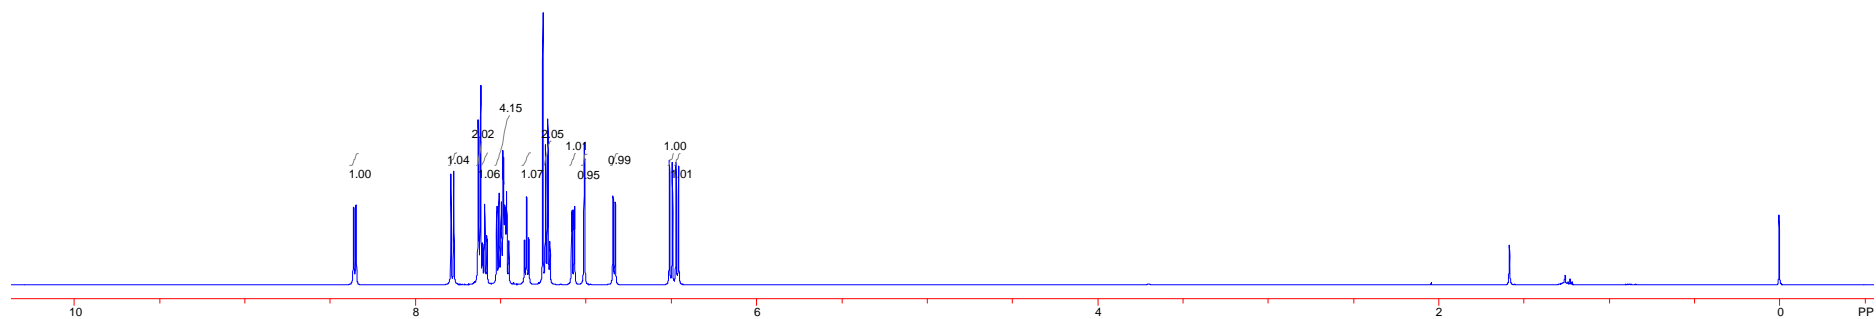

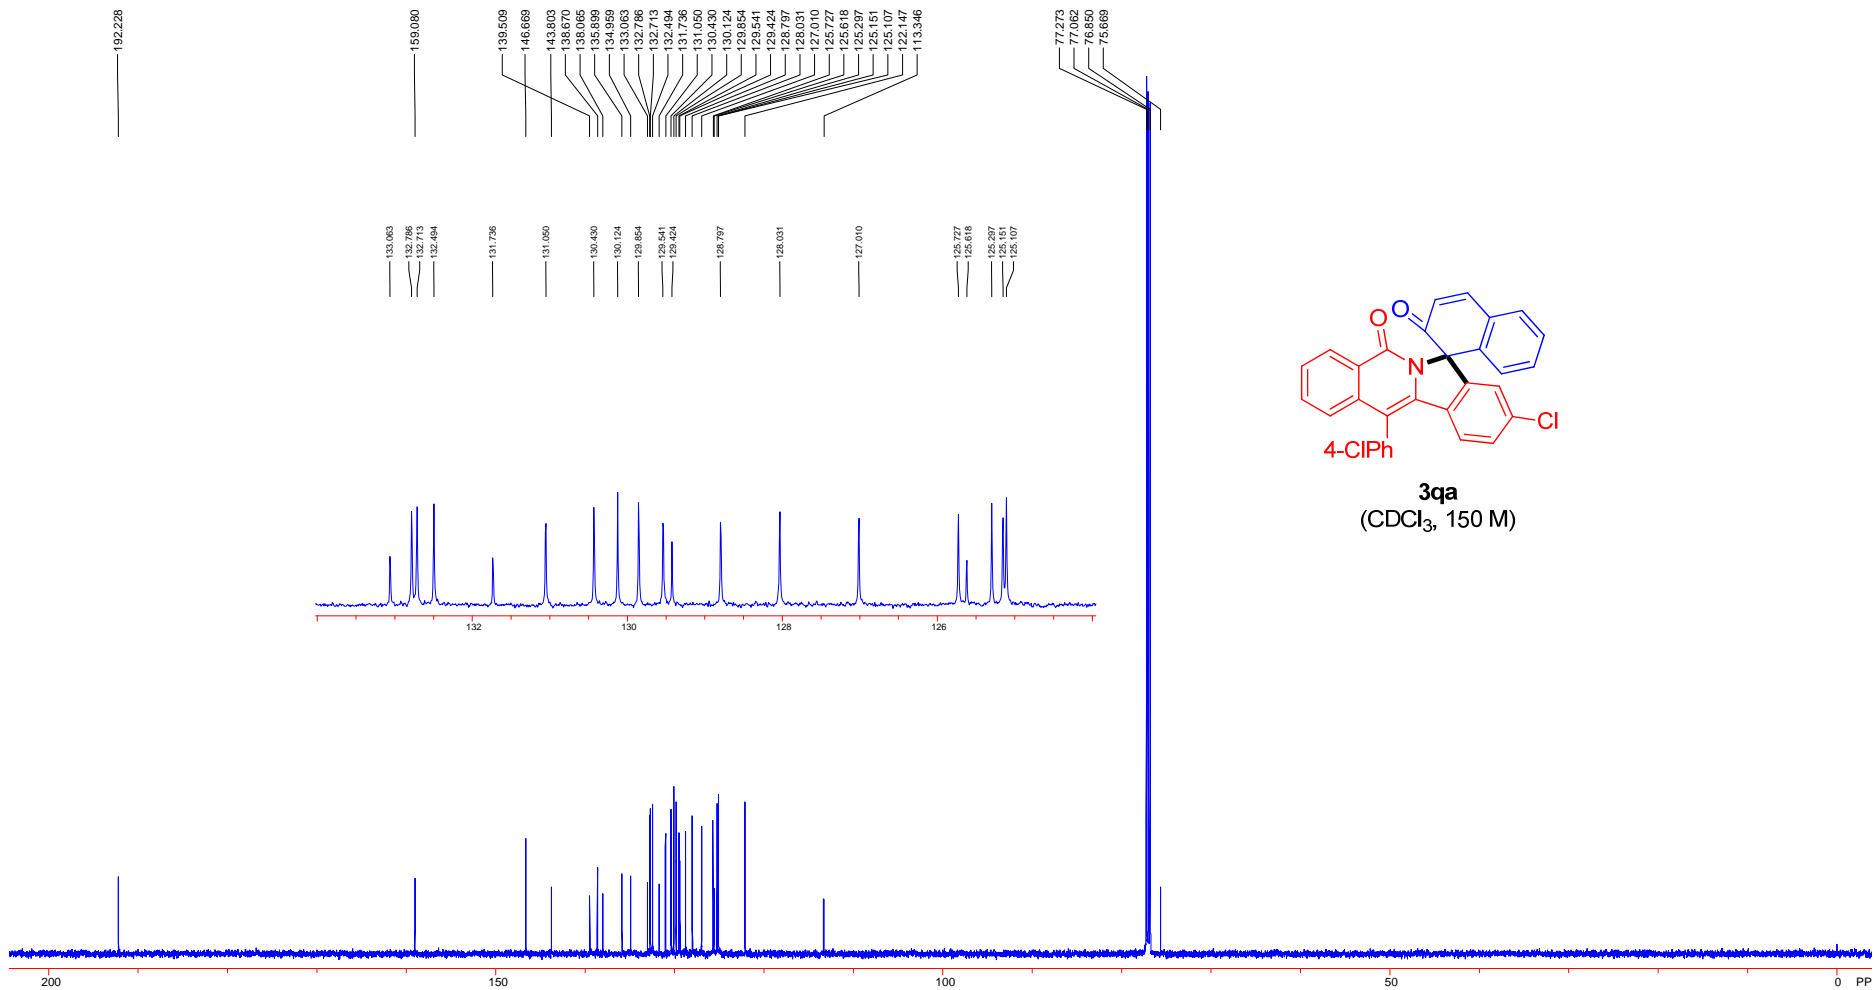

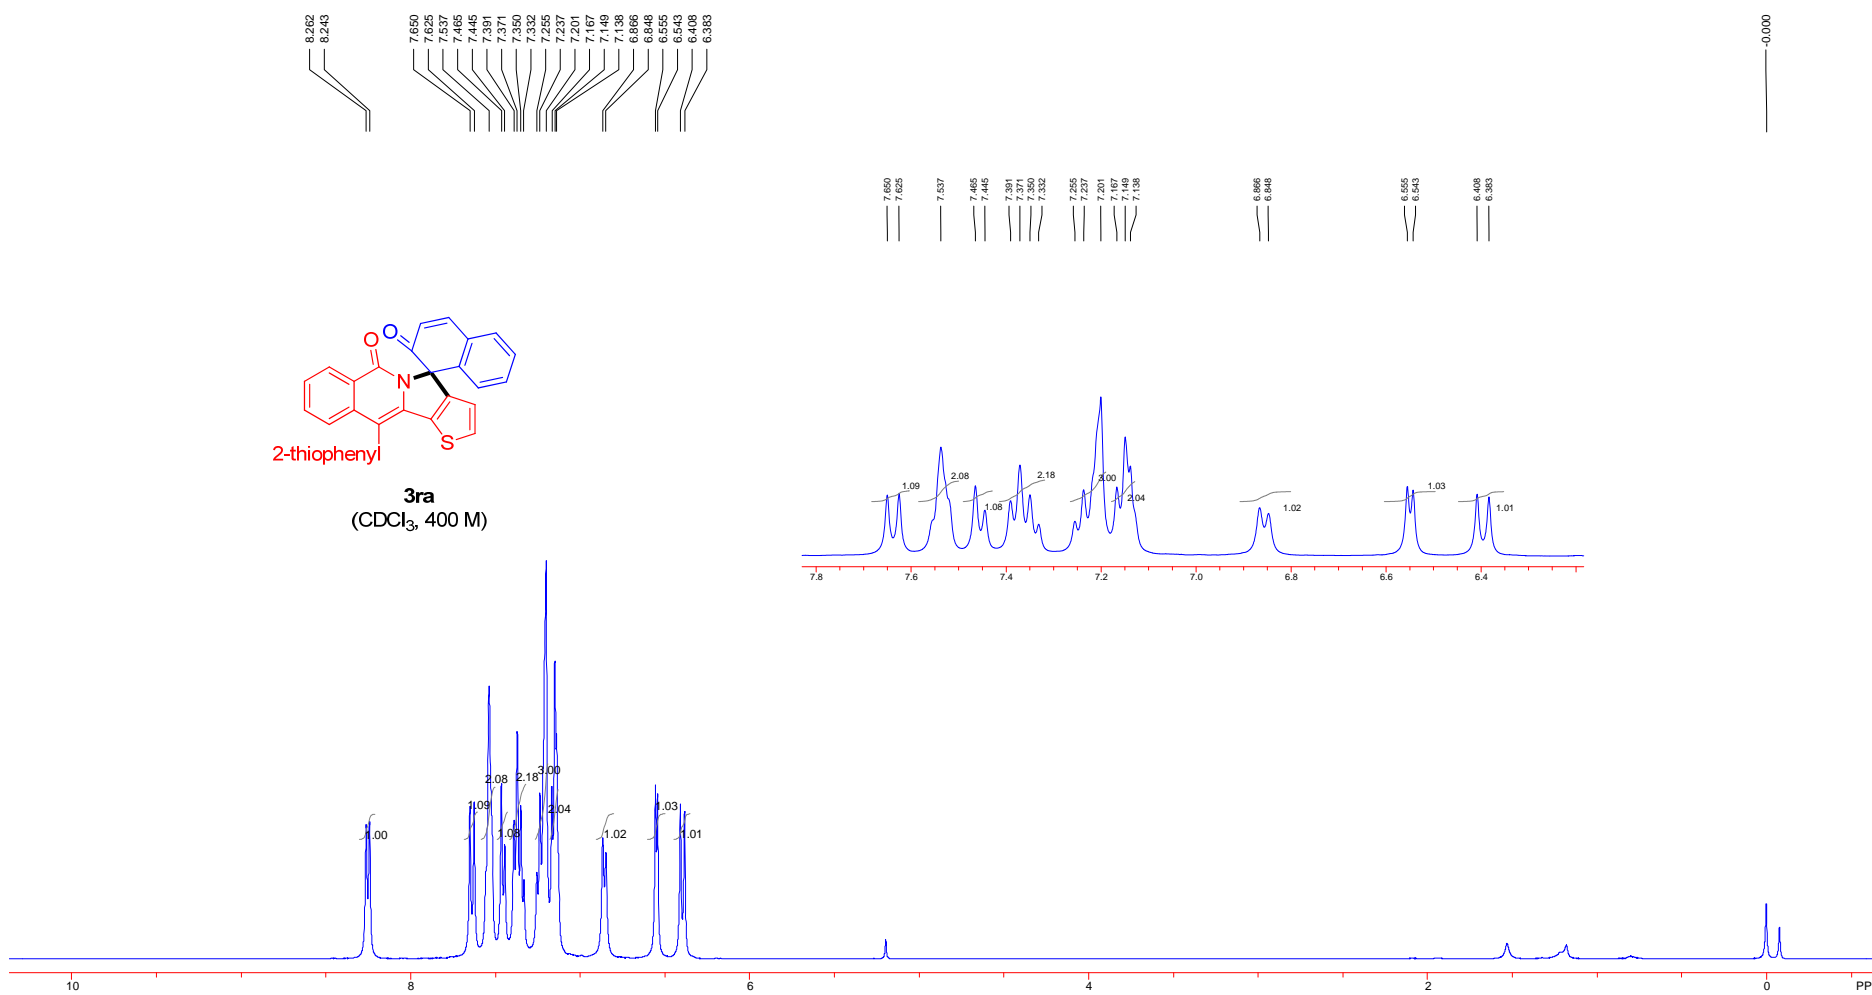



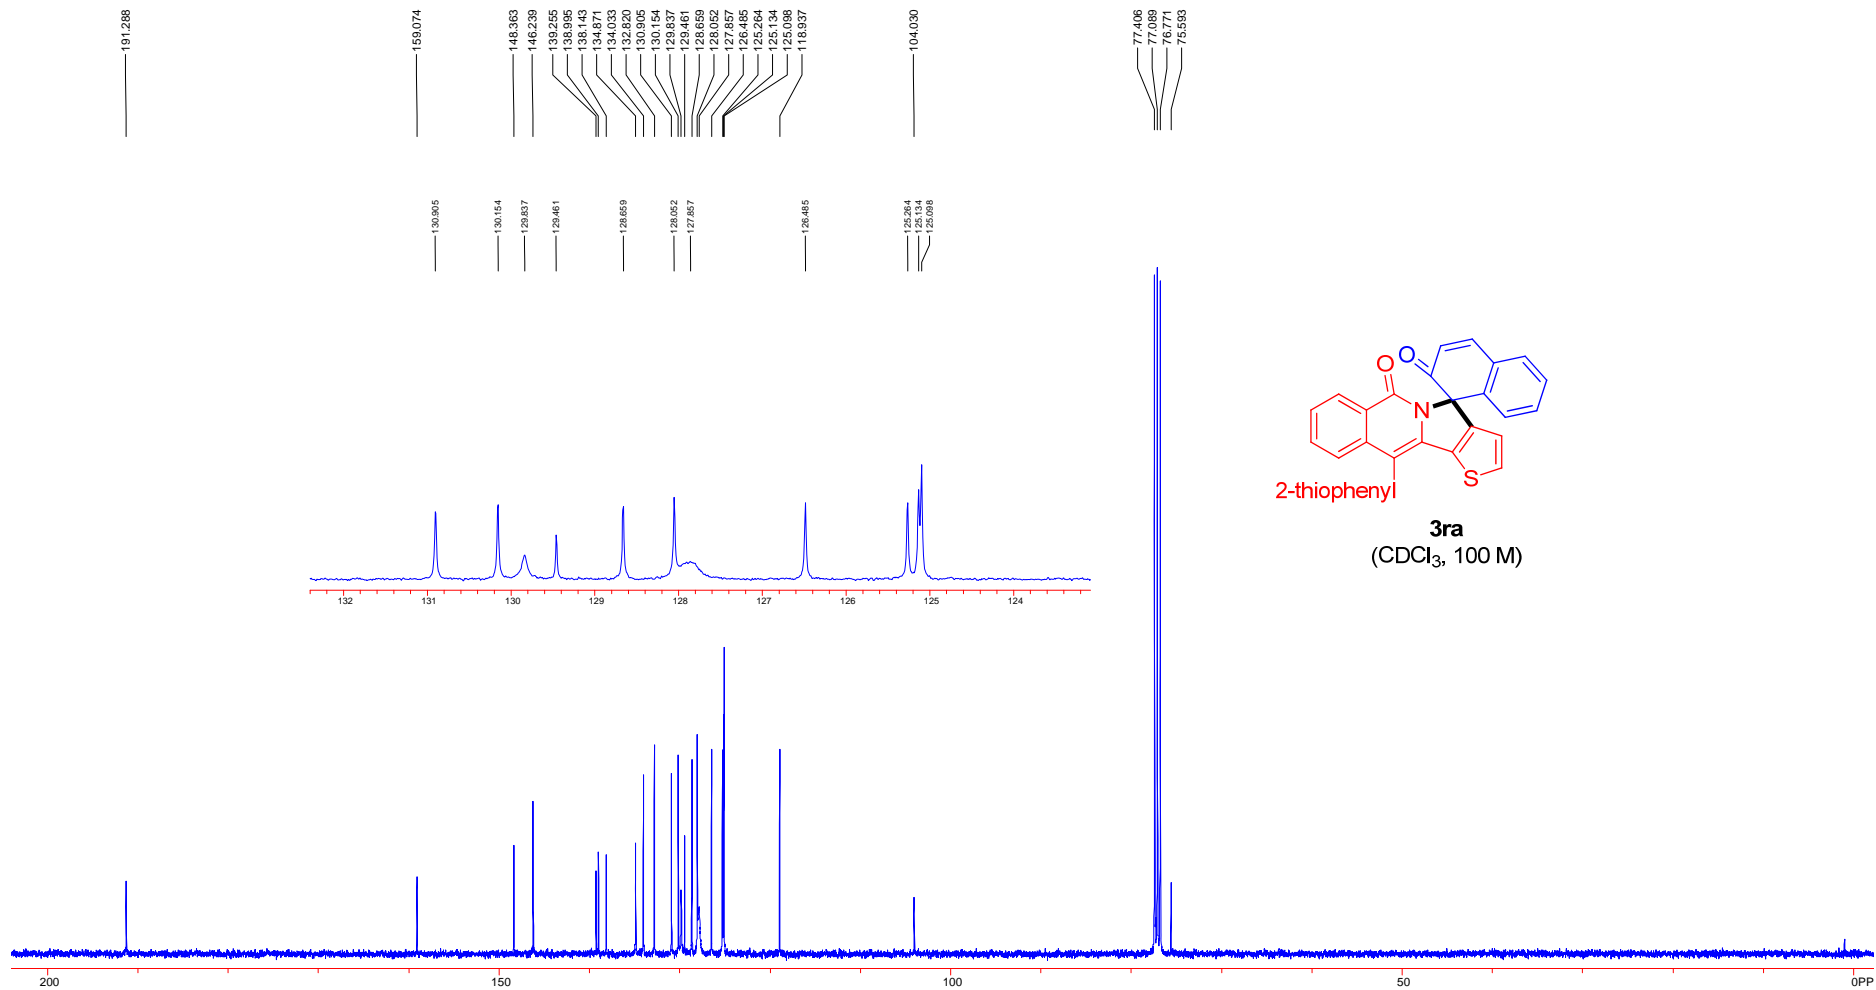

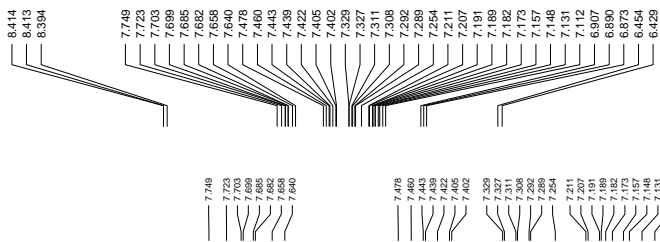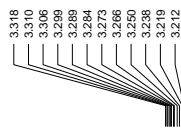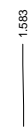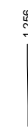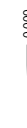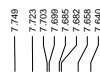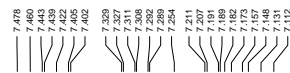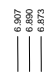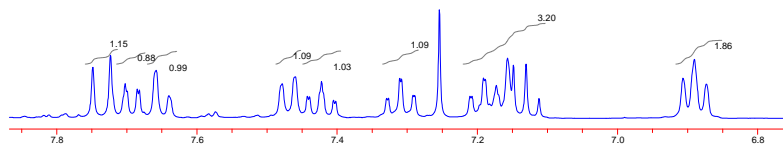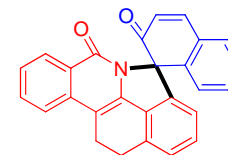

**3sa**  
(CDCl<sub>3</sub>, 400 M)

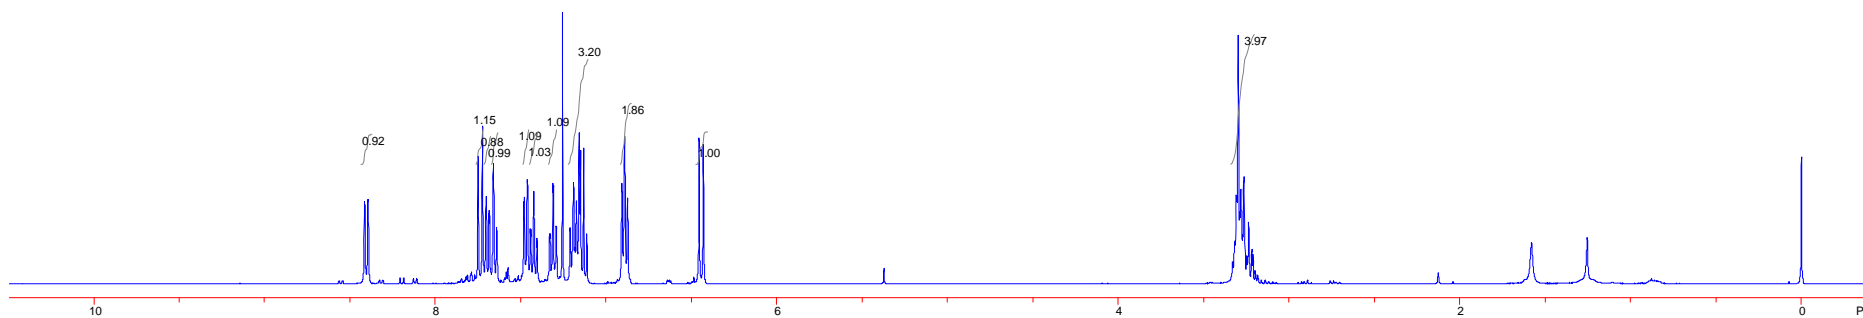

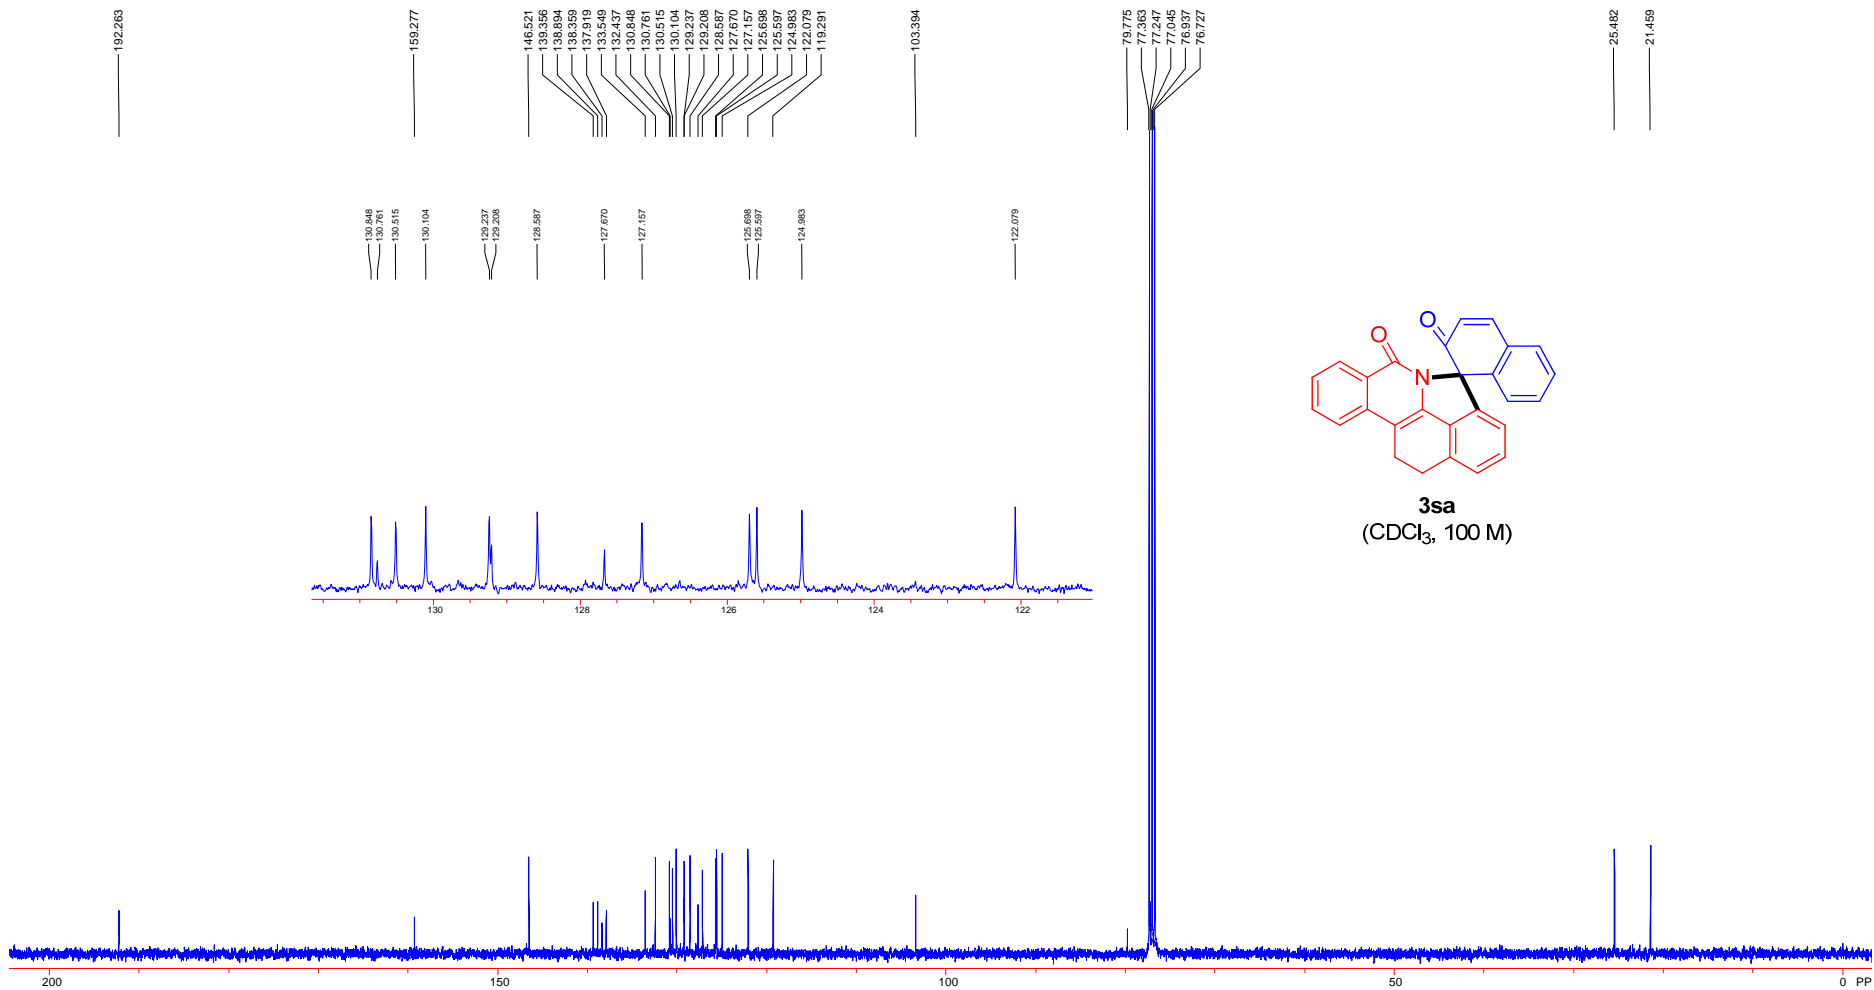

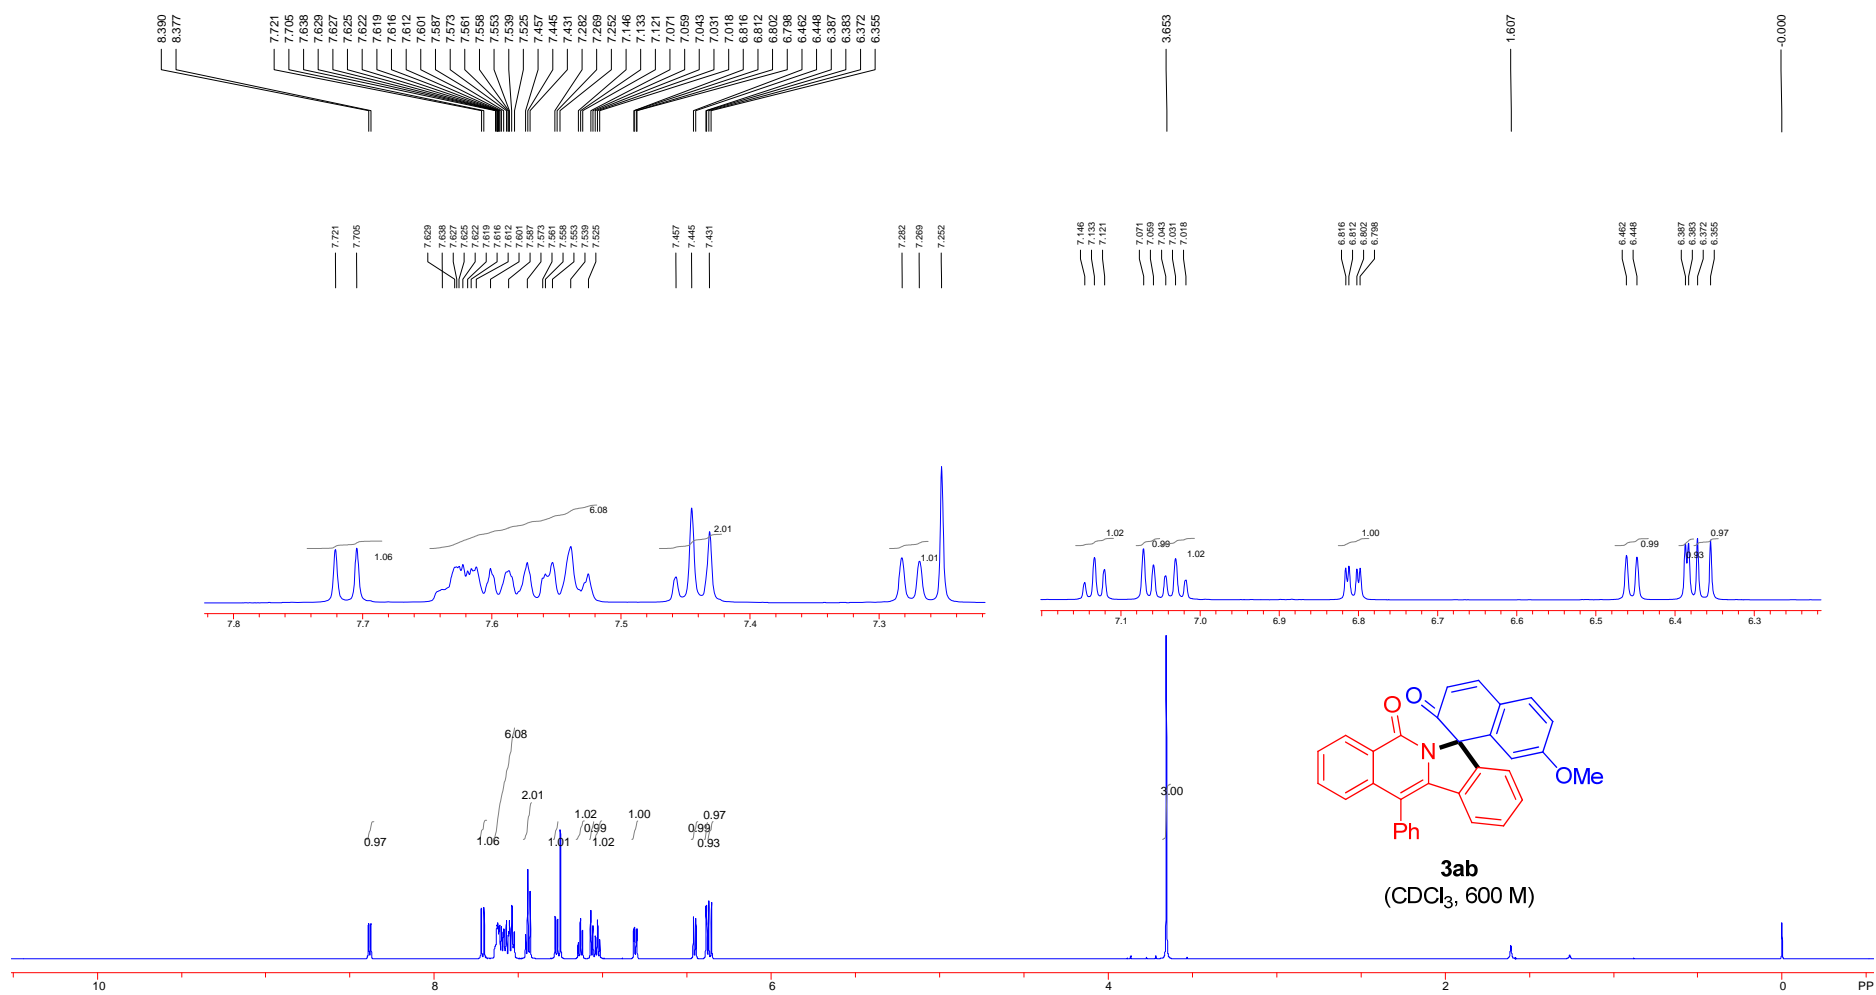

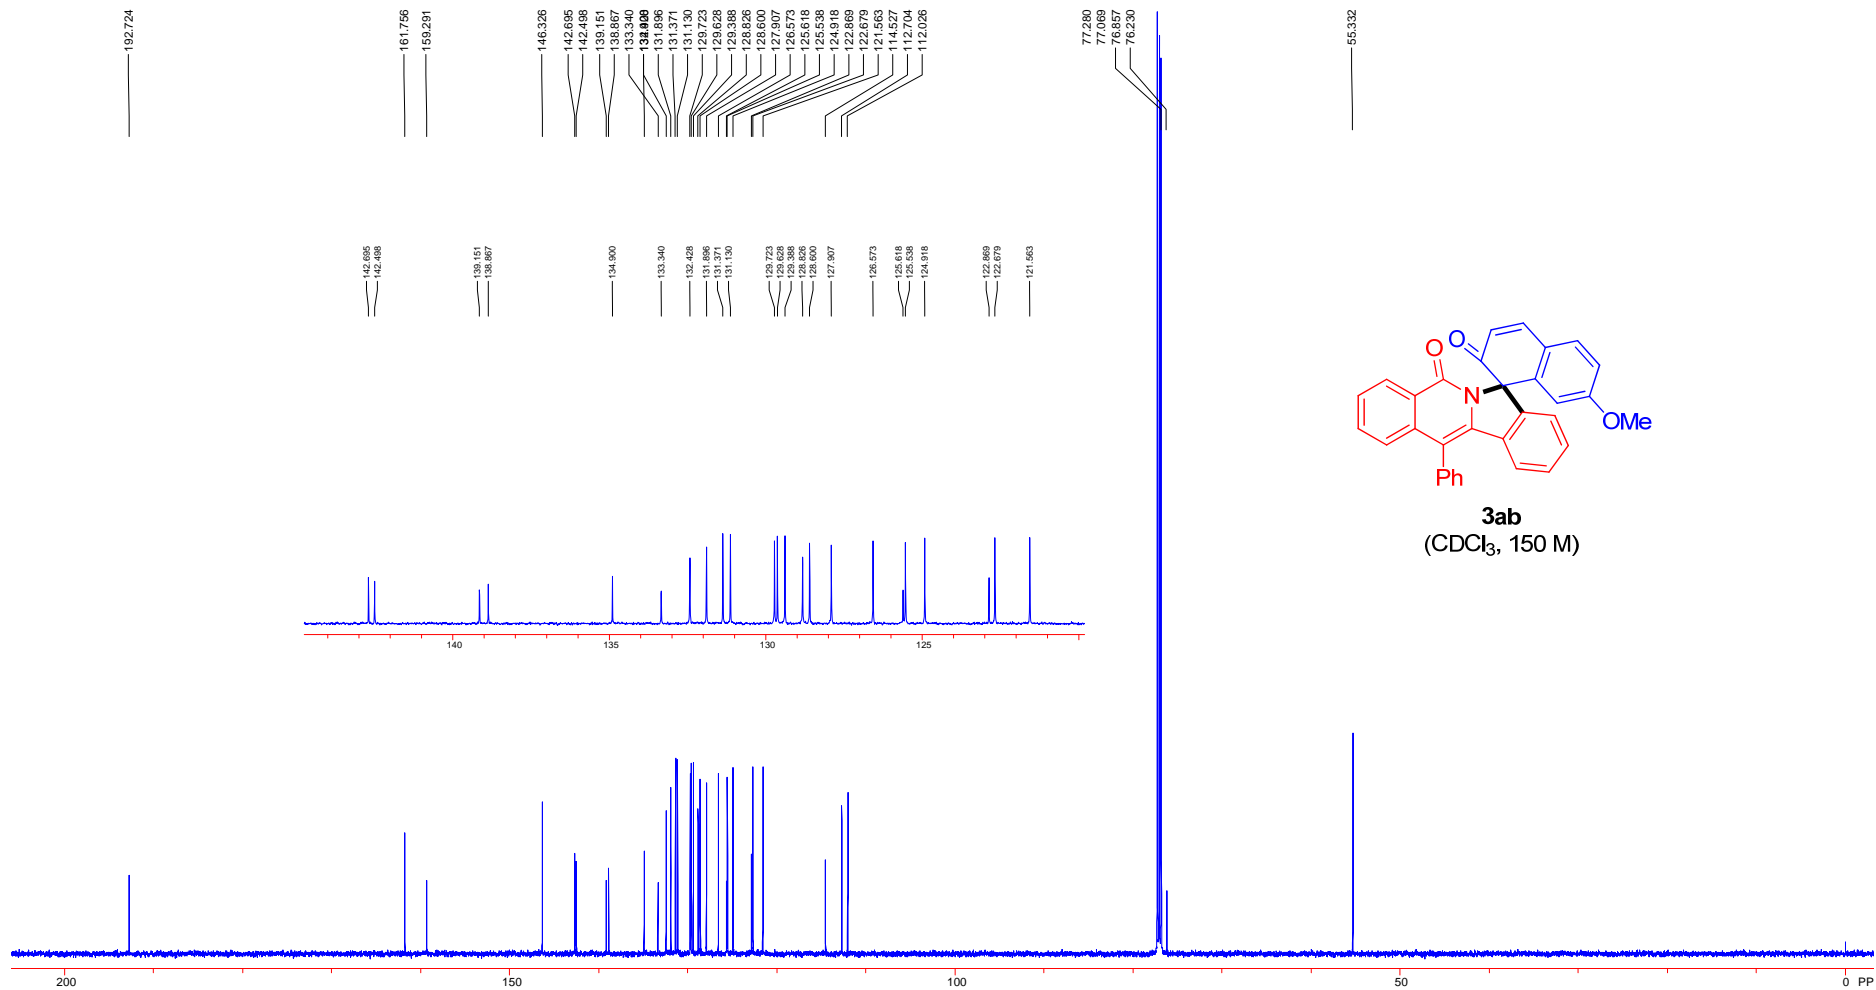

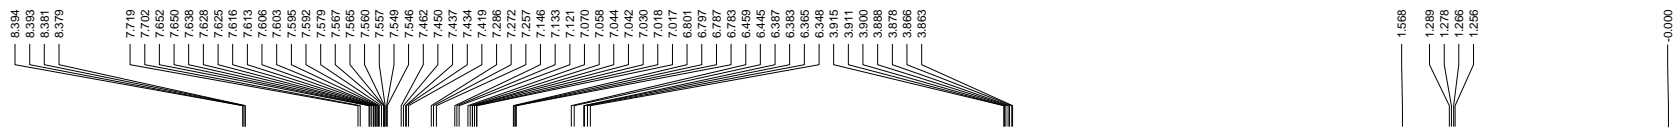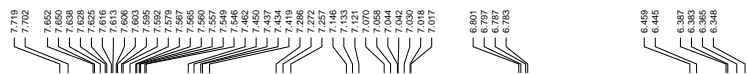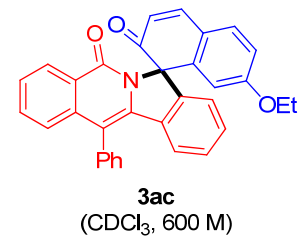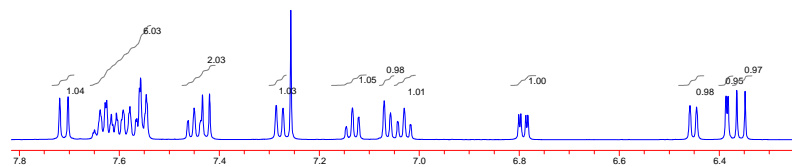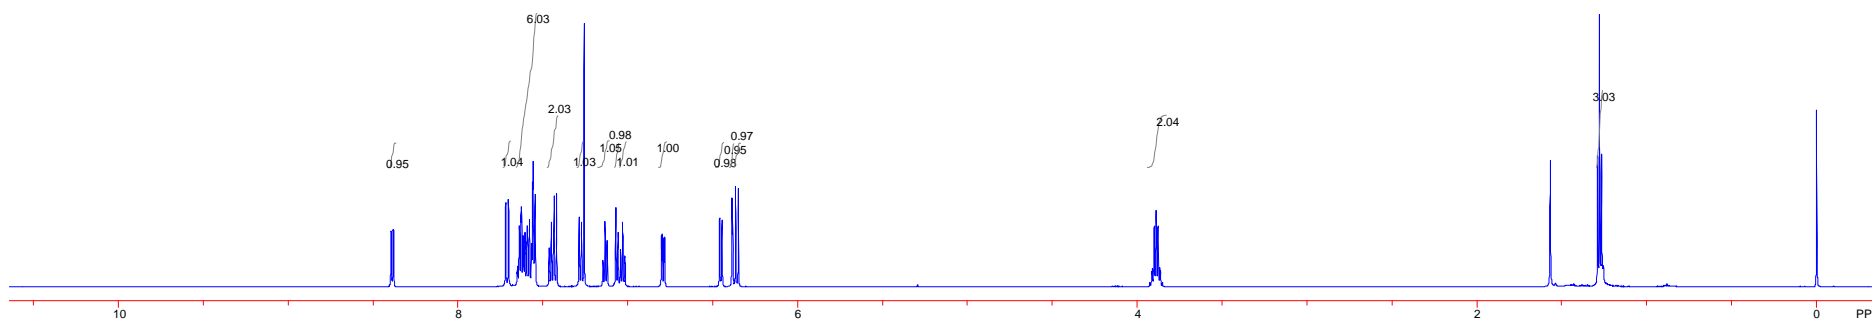

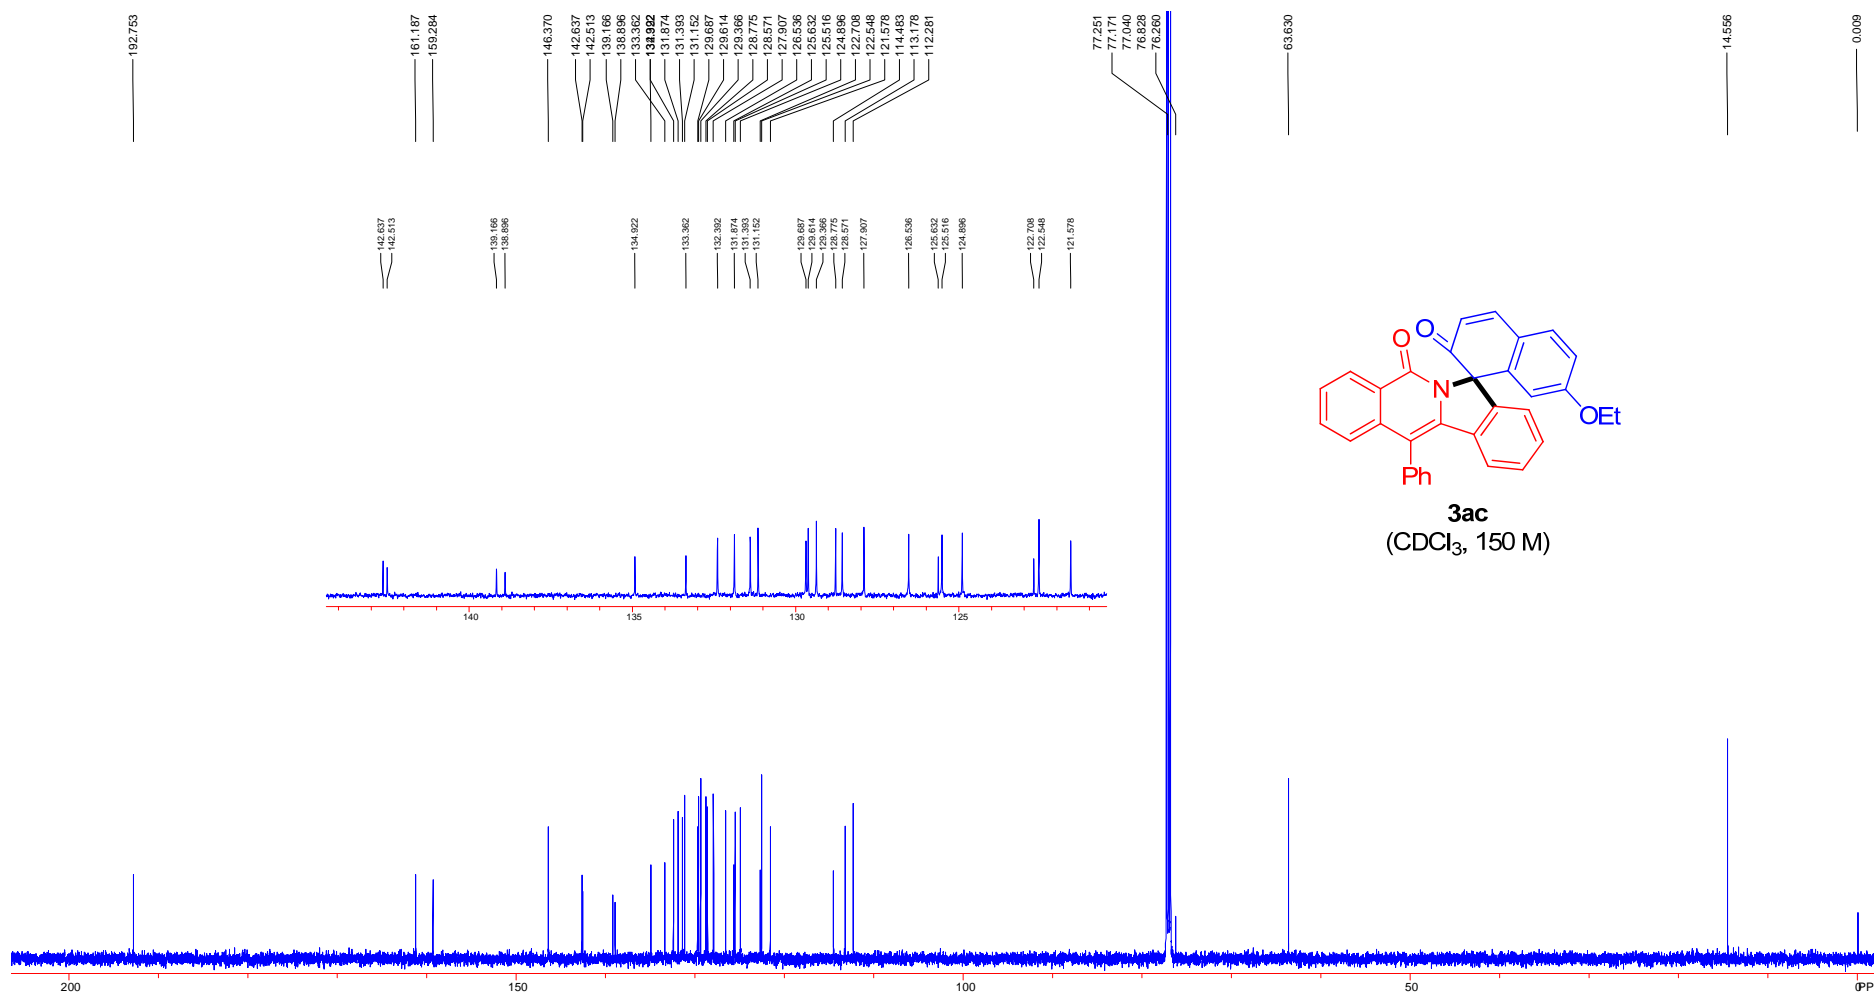

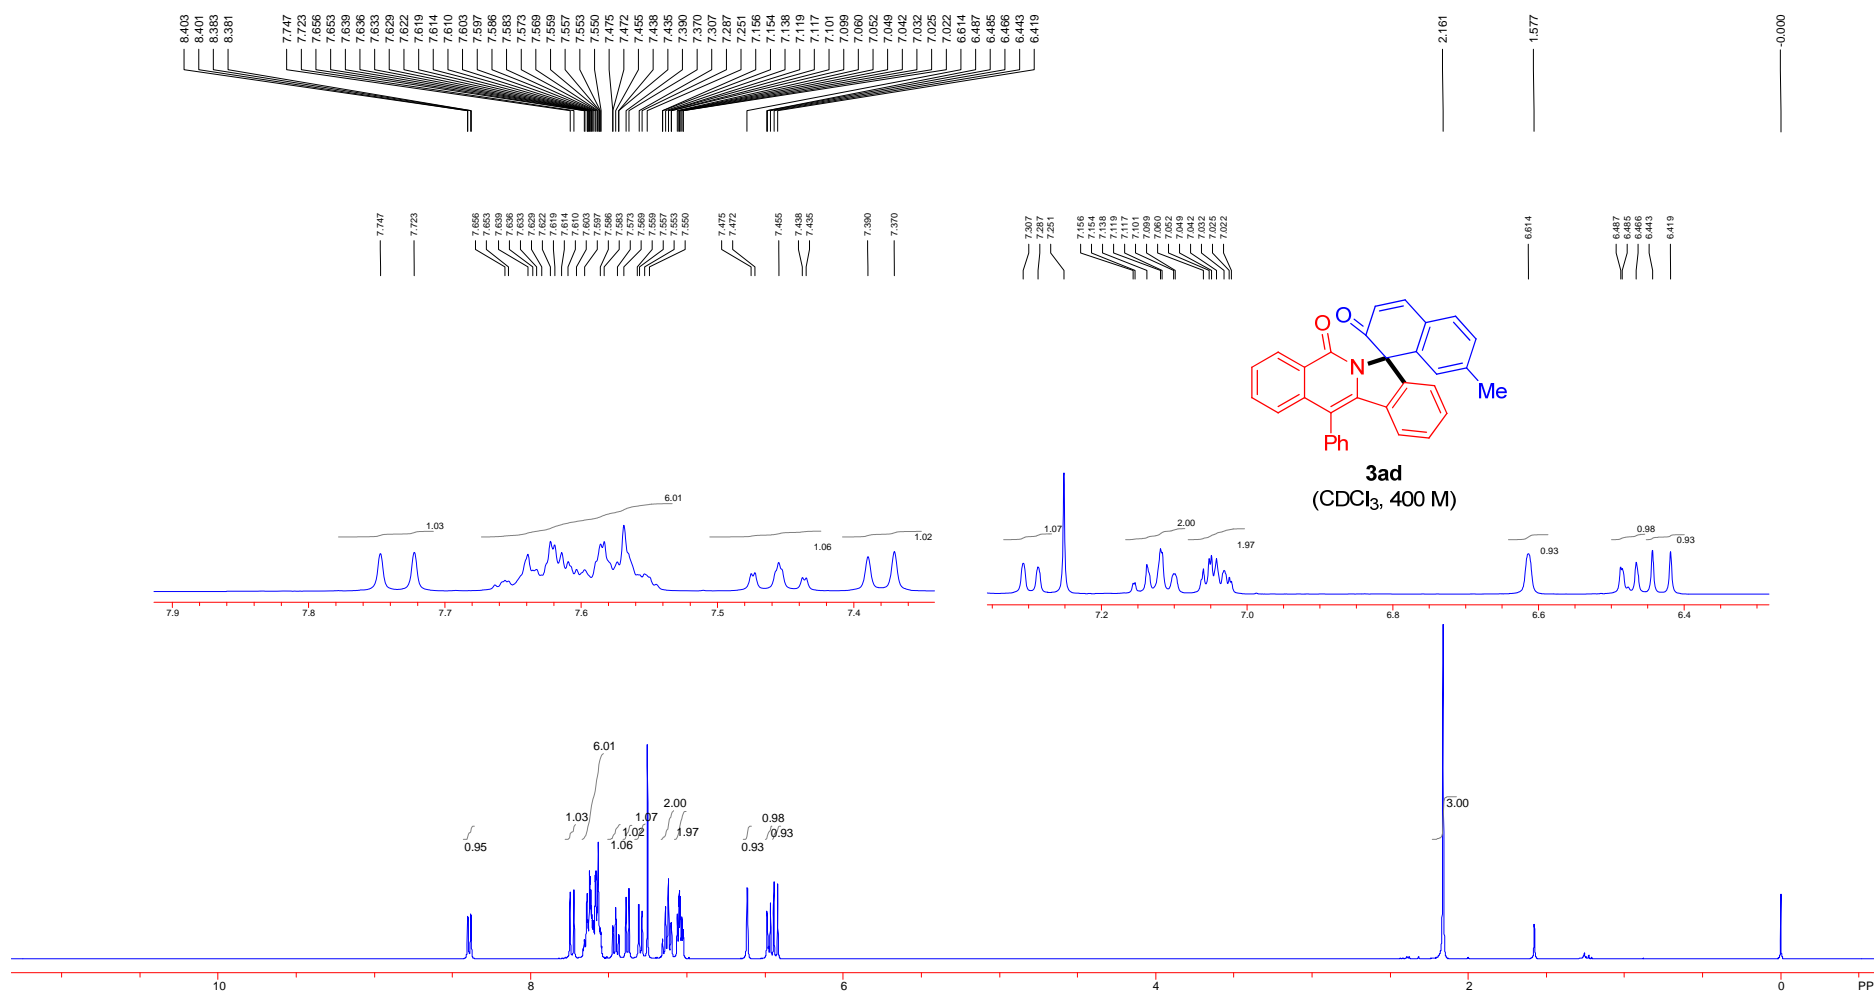



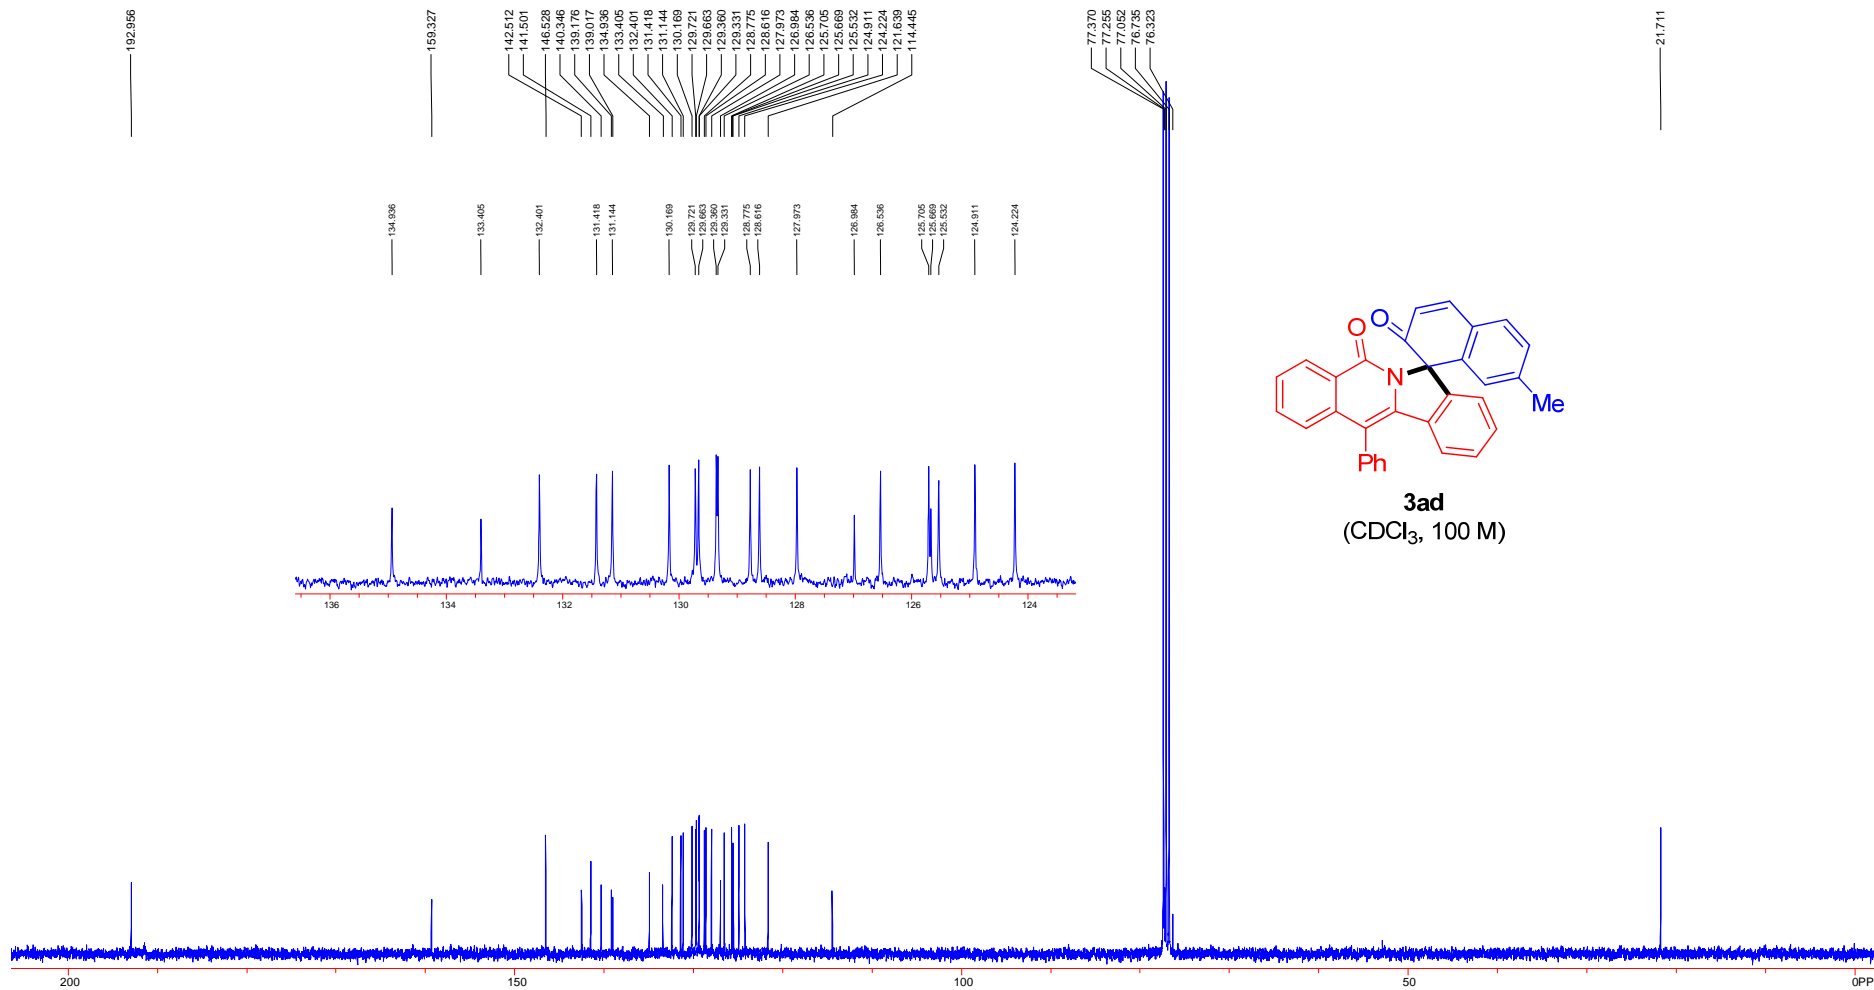

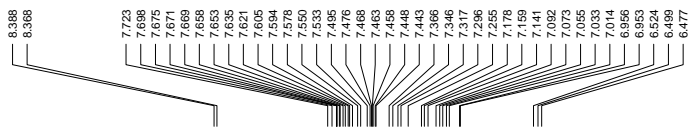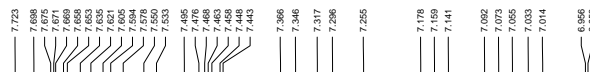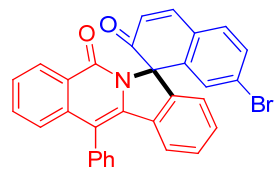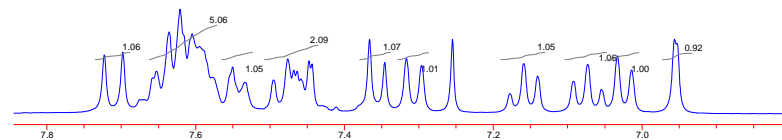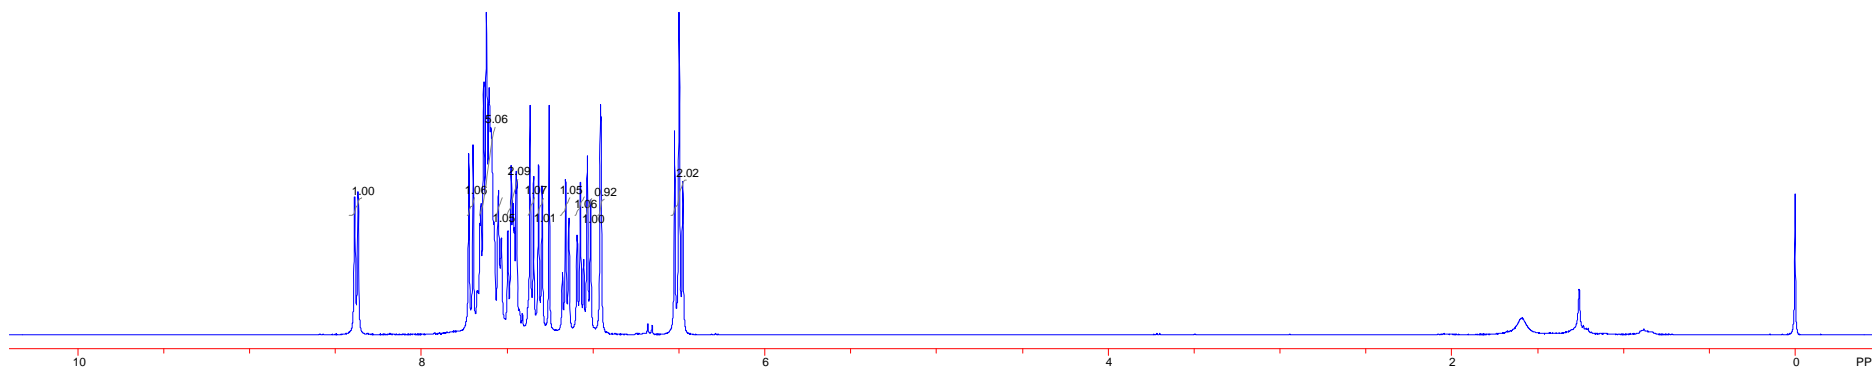

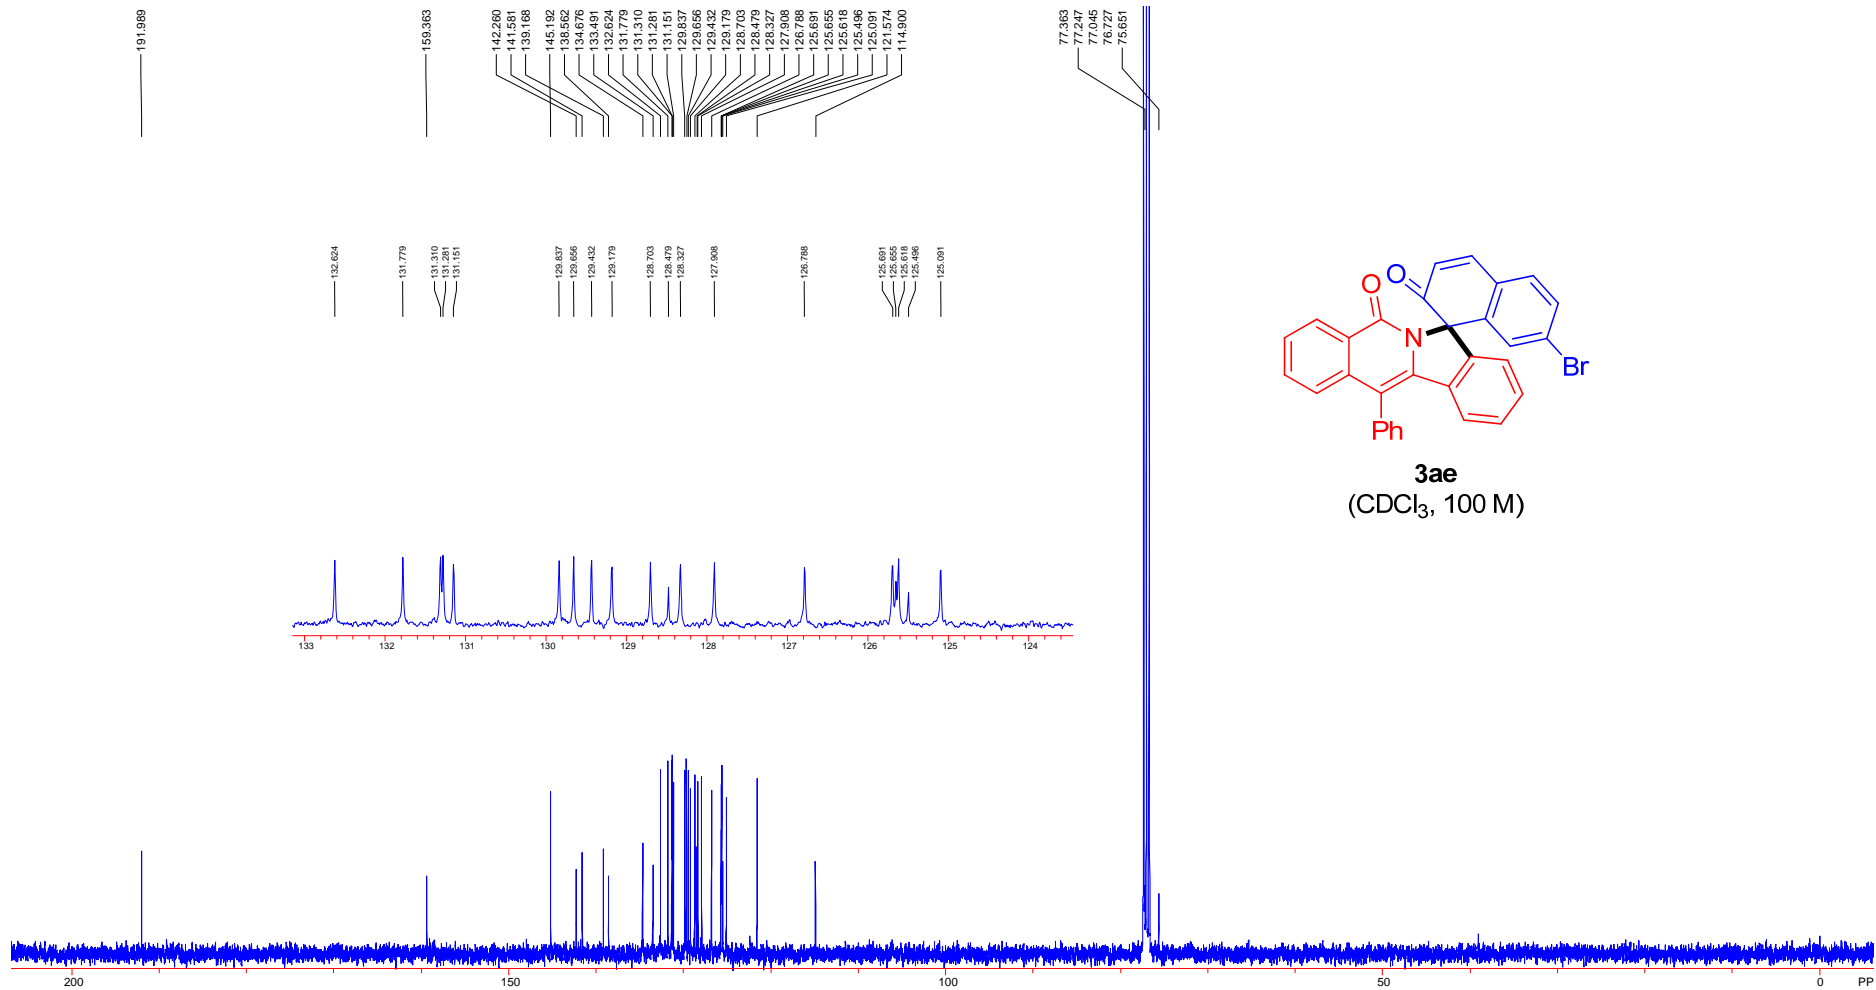

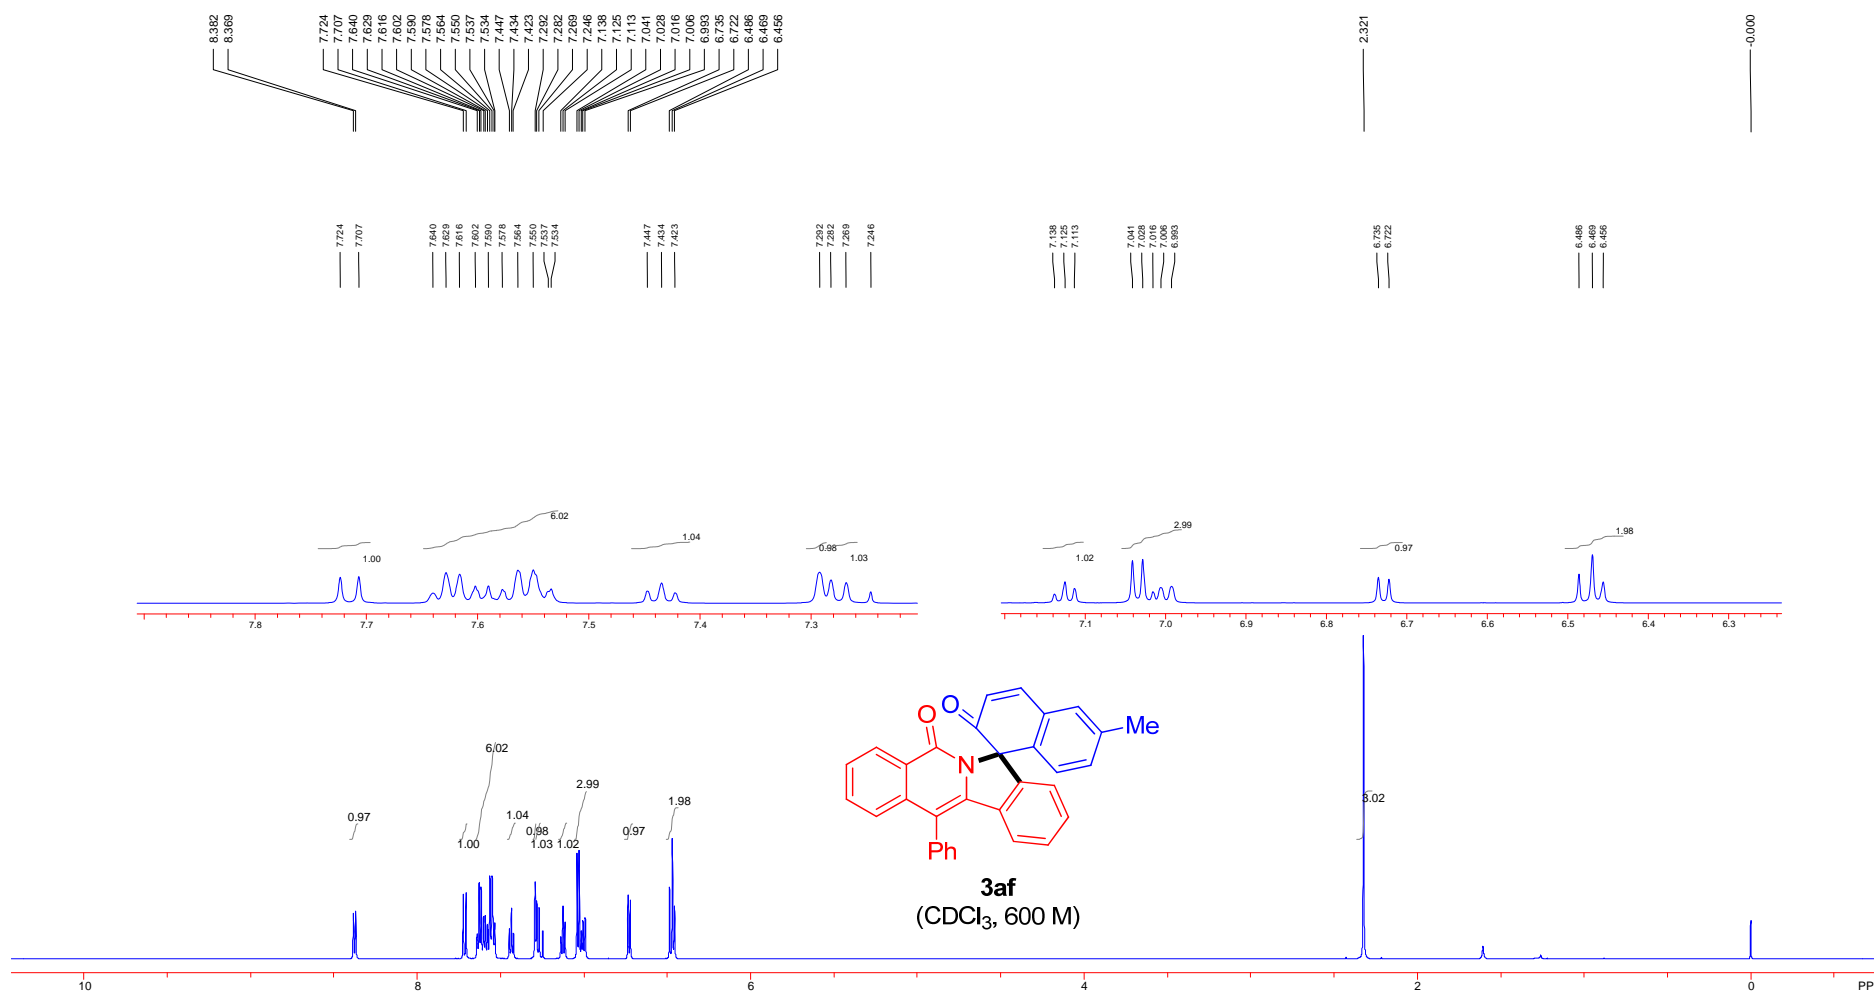

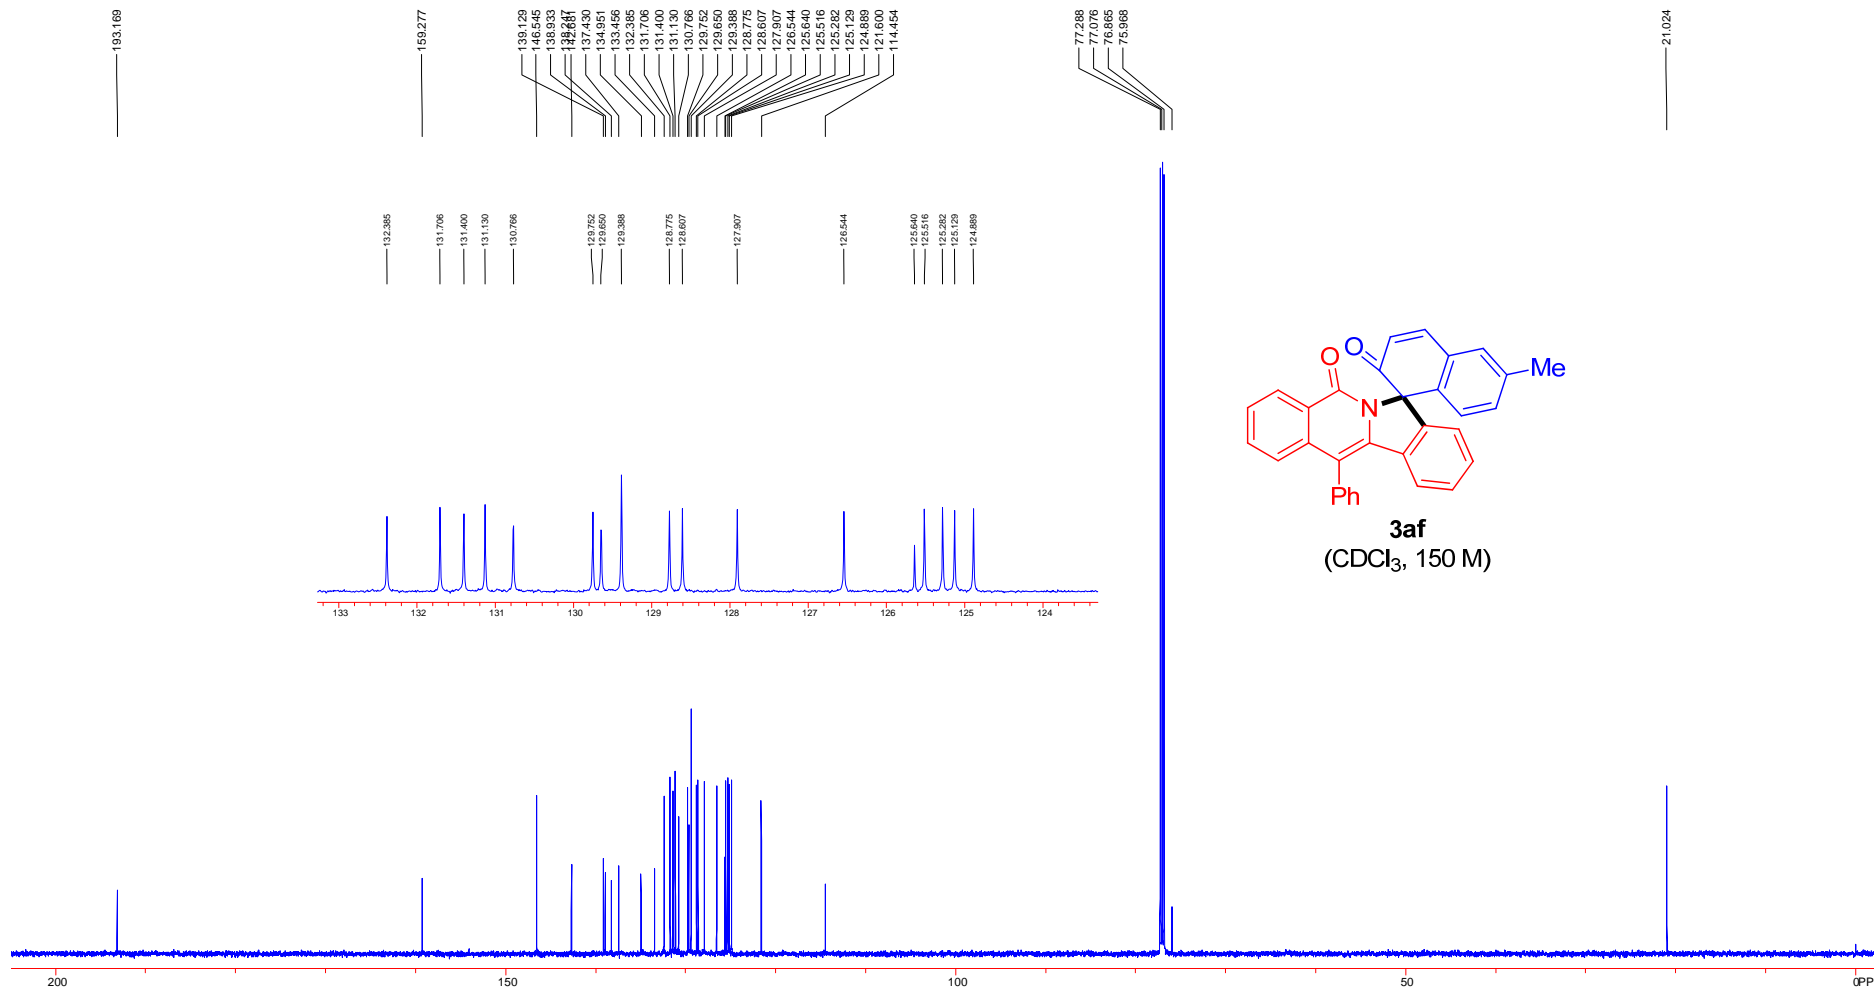

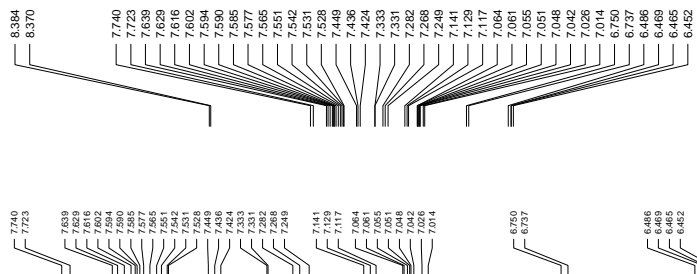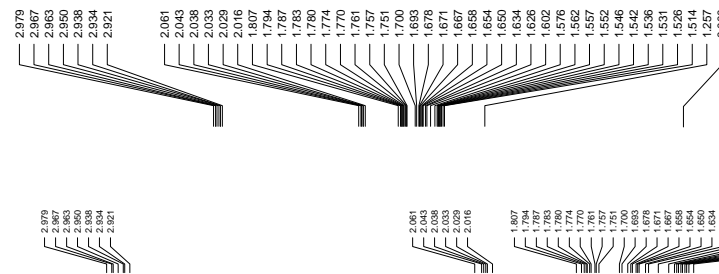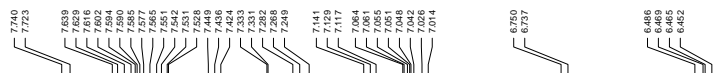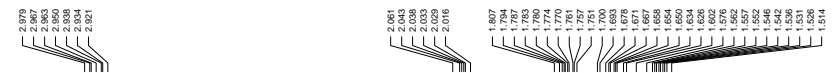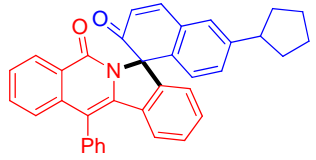

**3ag**  
(CDCl<sub>3</sub>, 600 M)

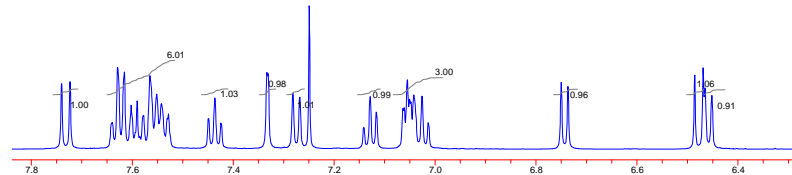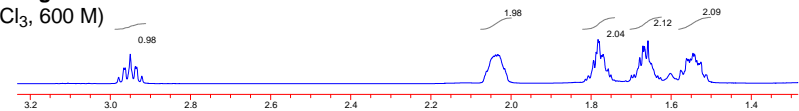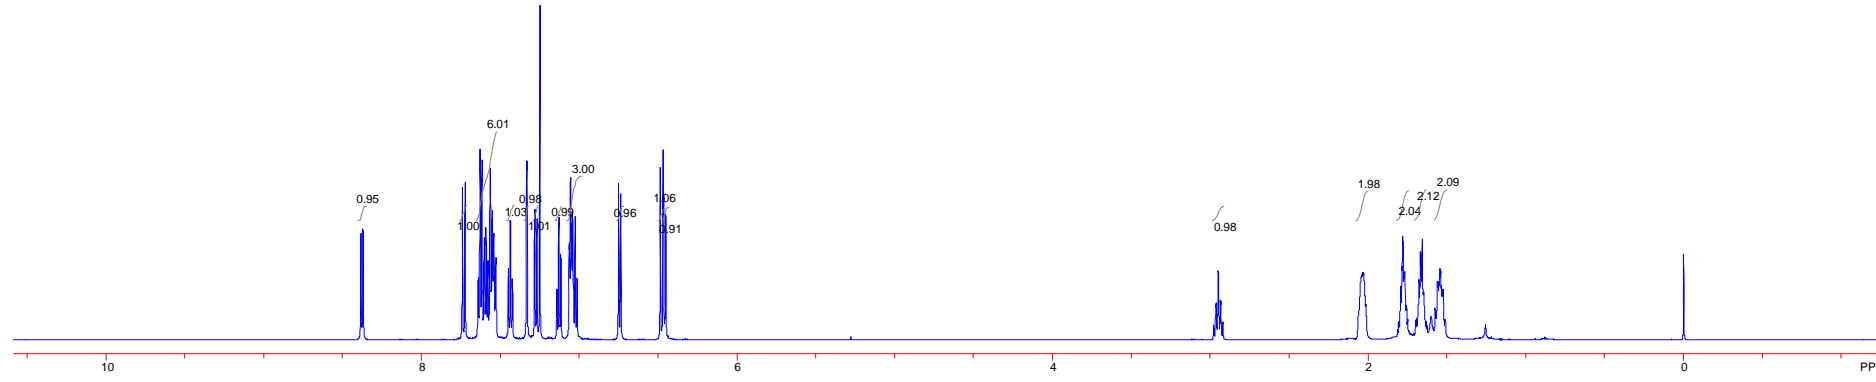

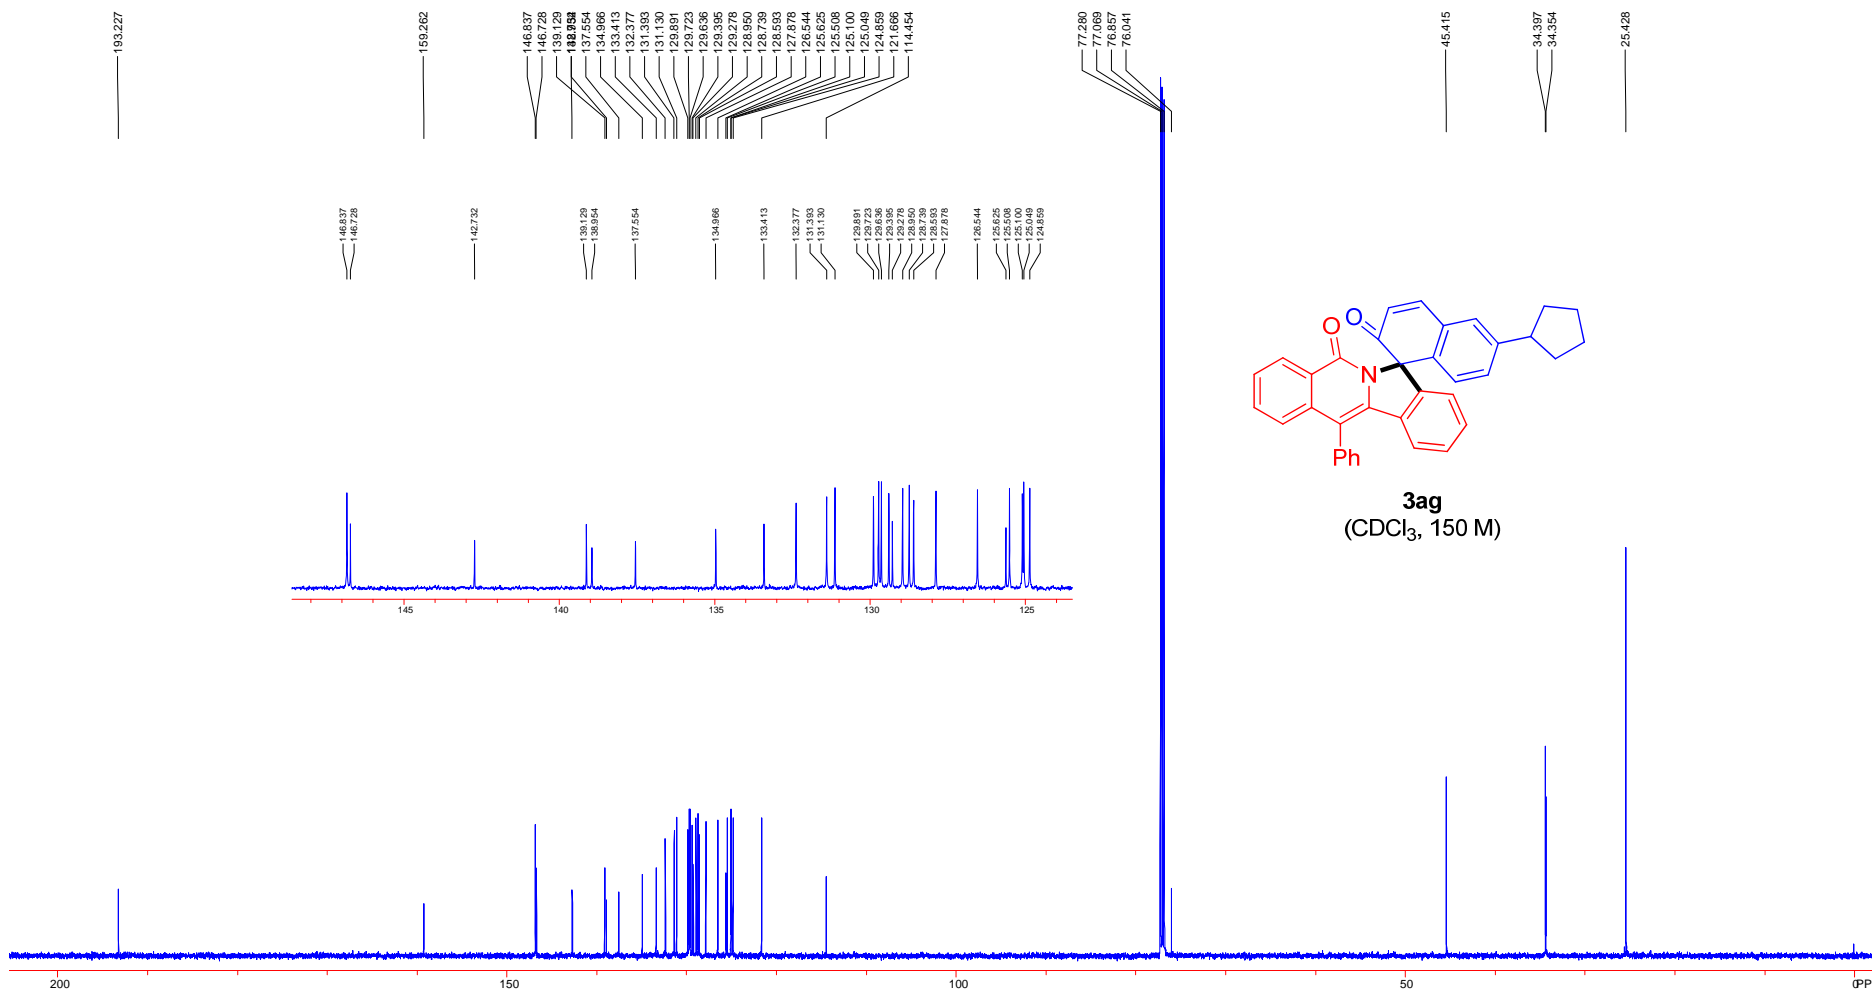

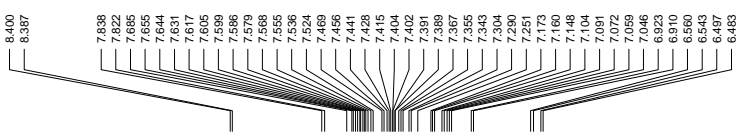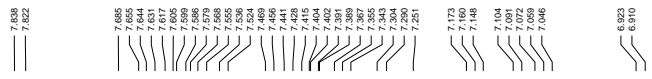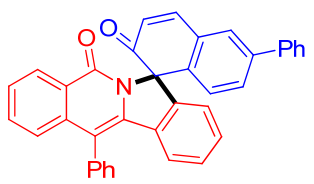

**3ah**  
(CDCl<sub>3</sub>, 600 M)

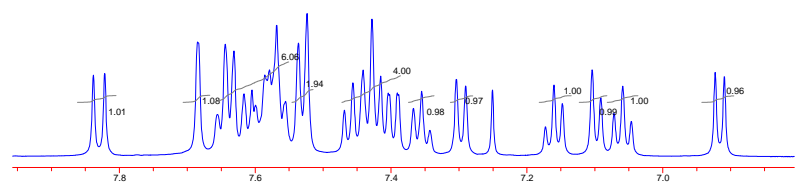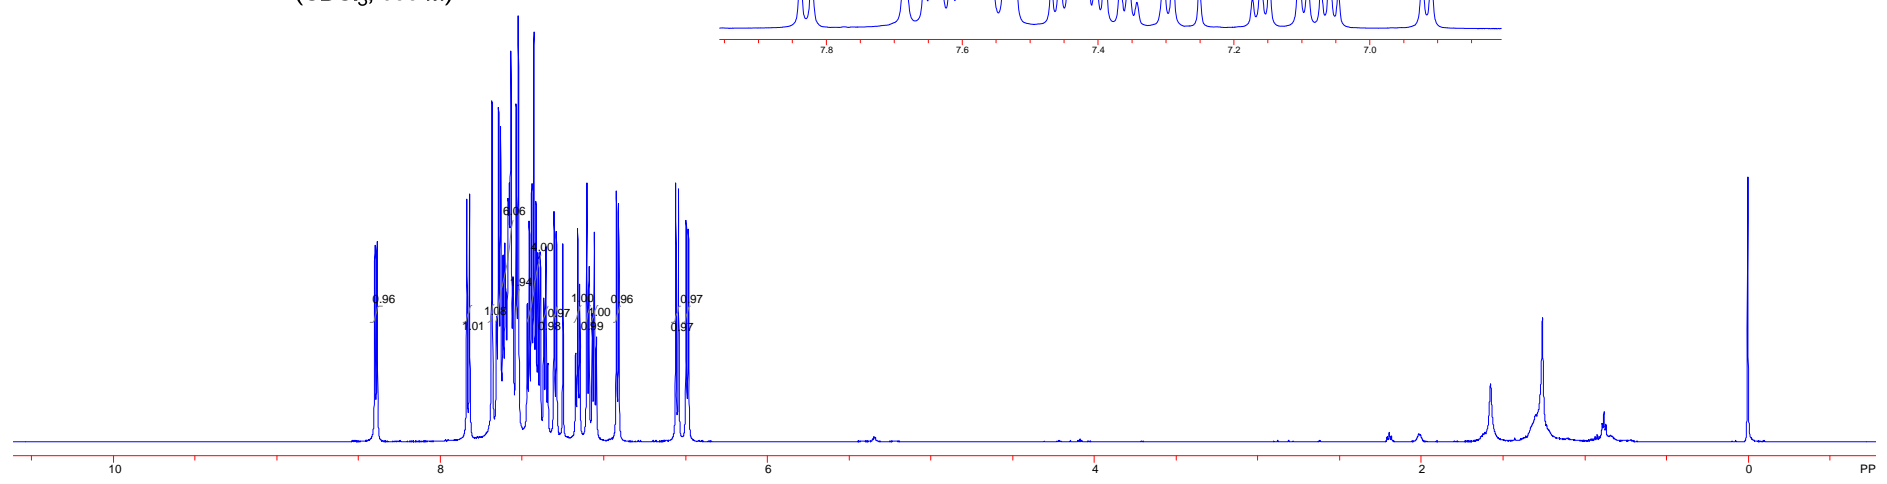



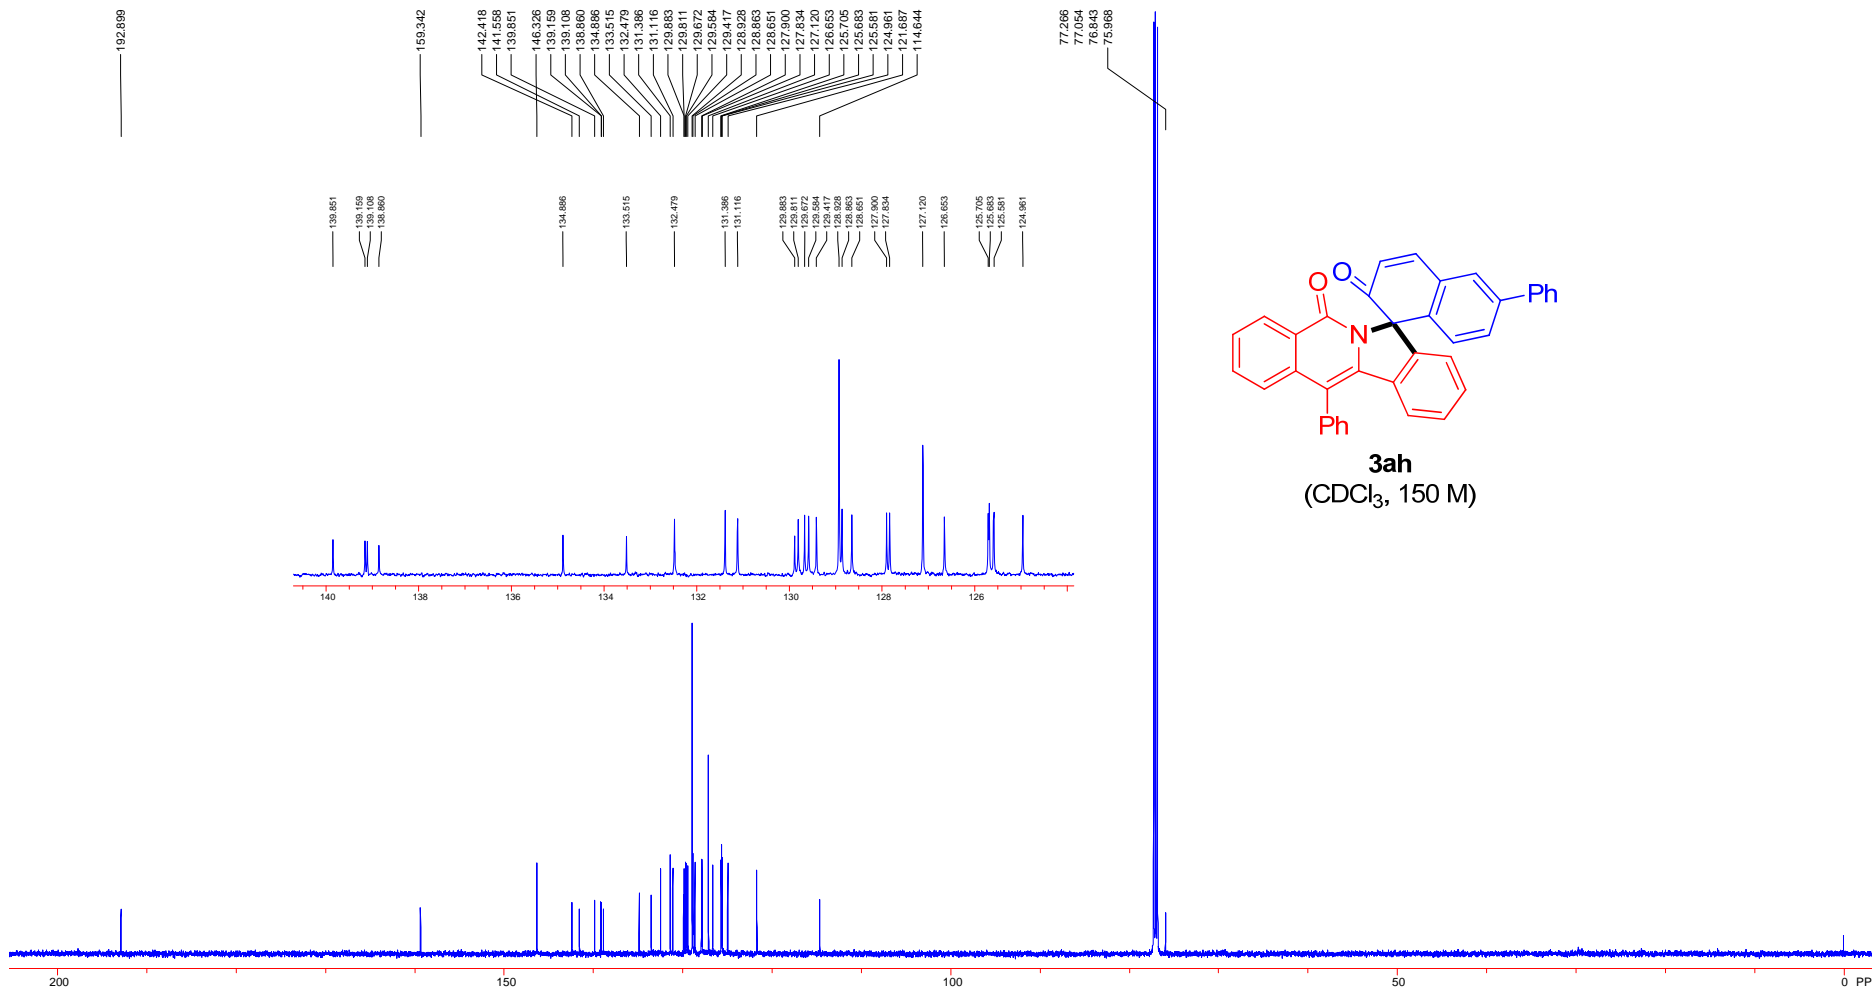

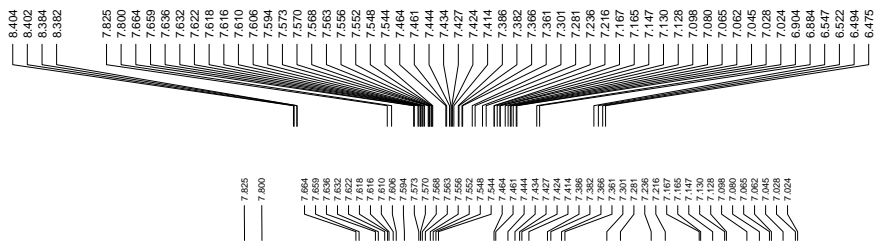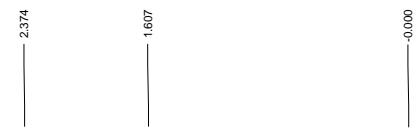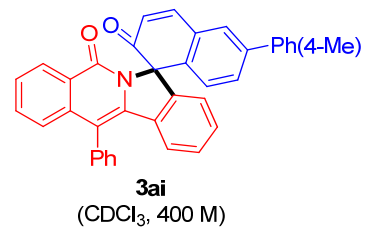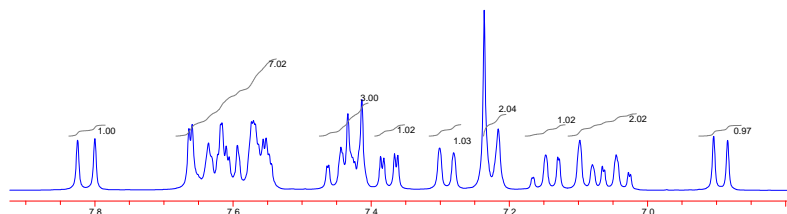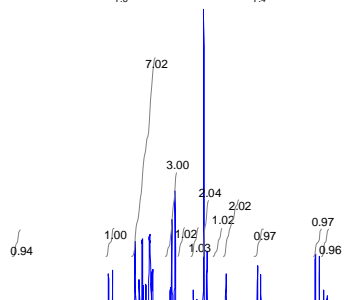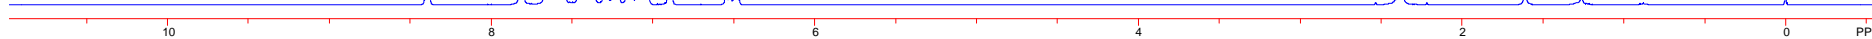

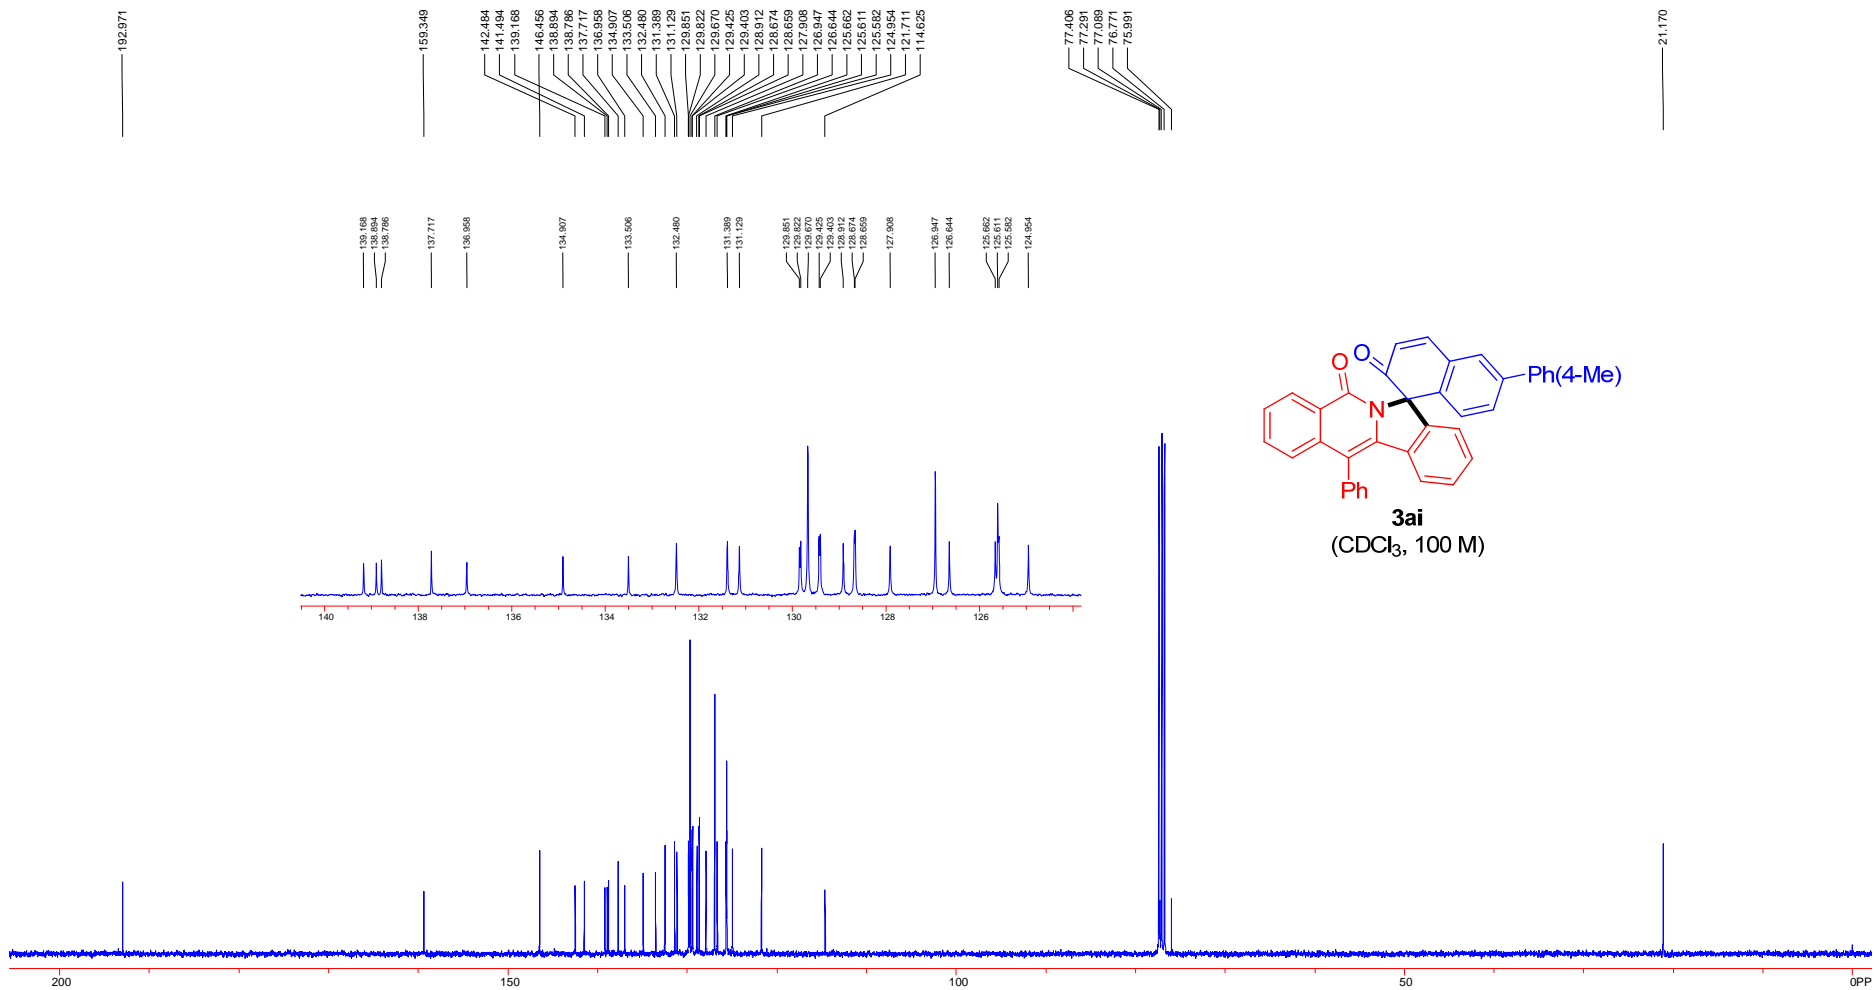

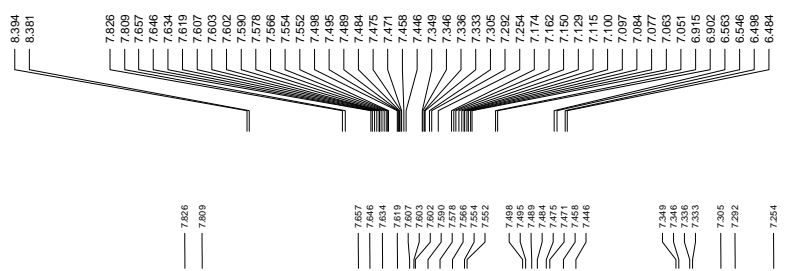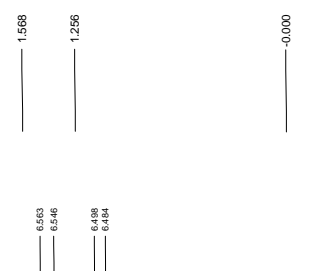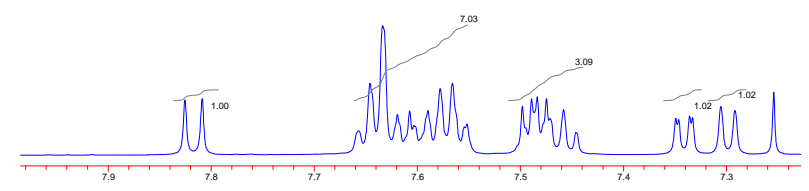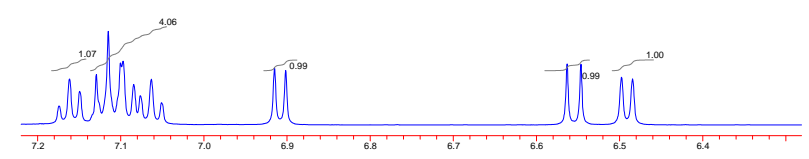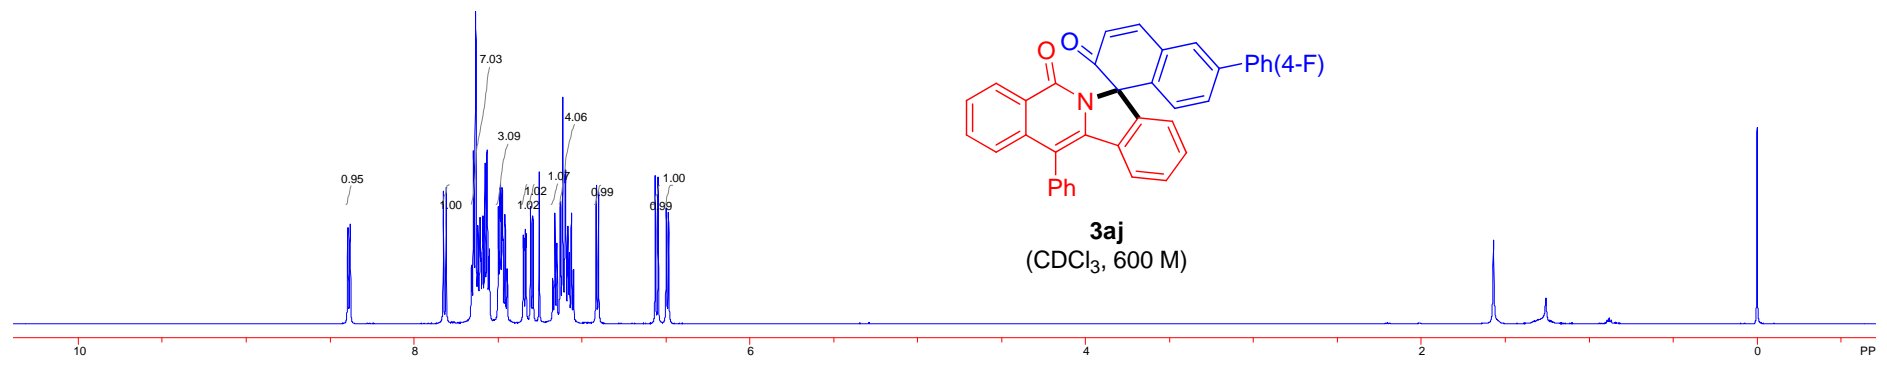

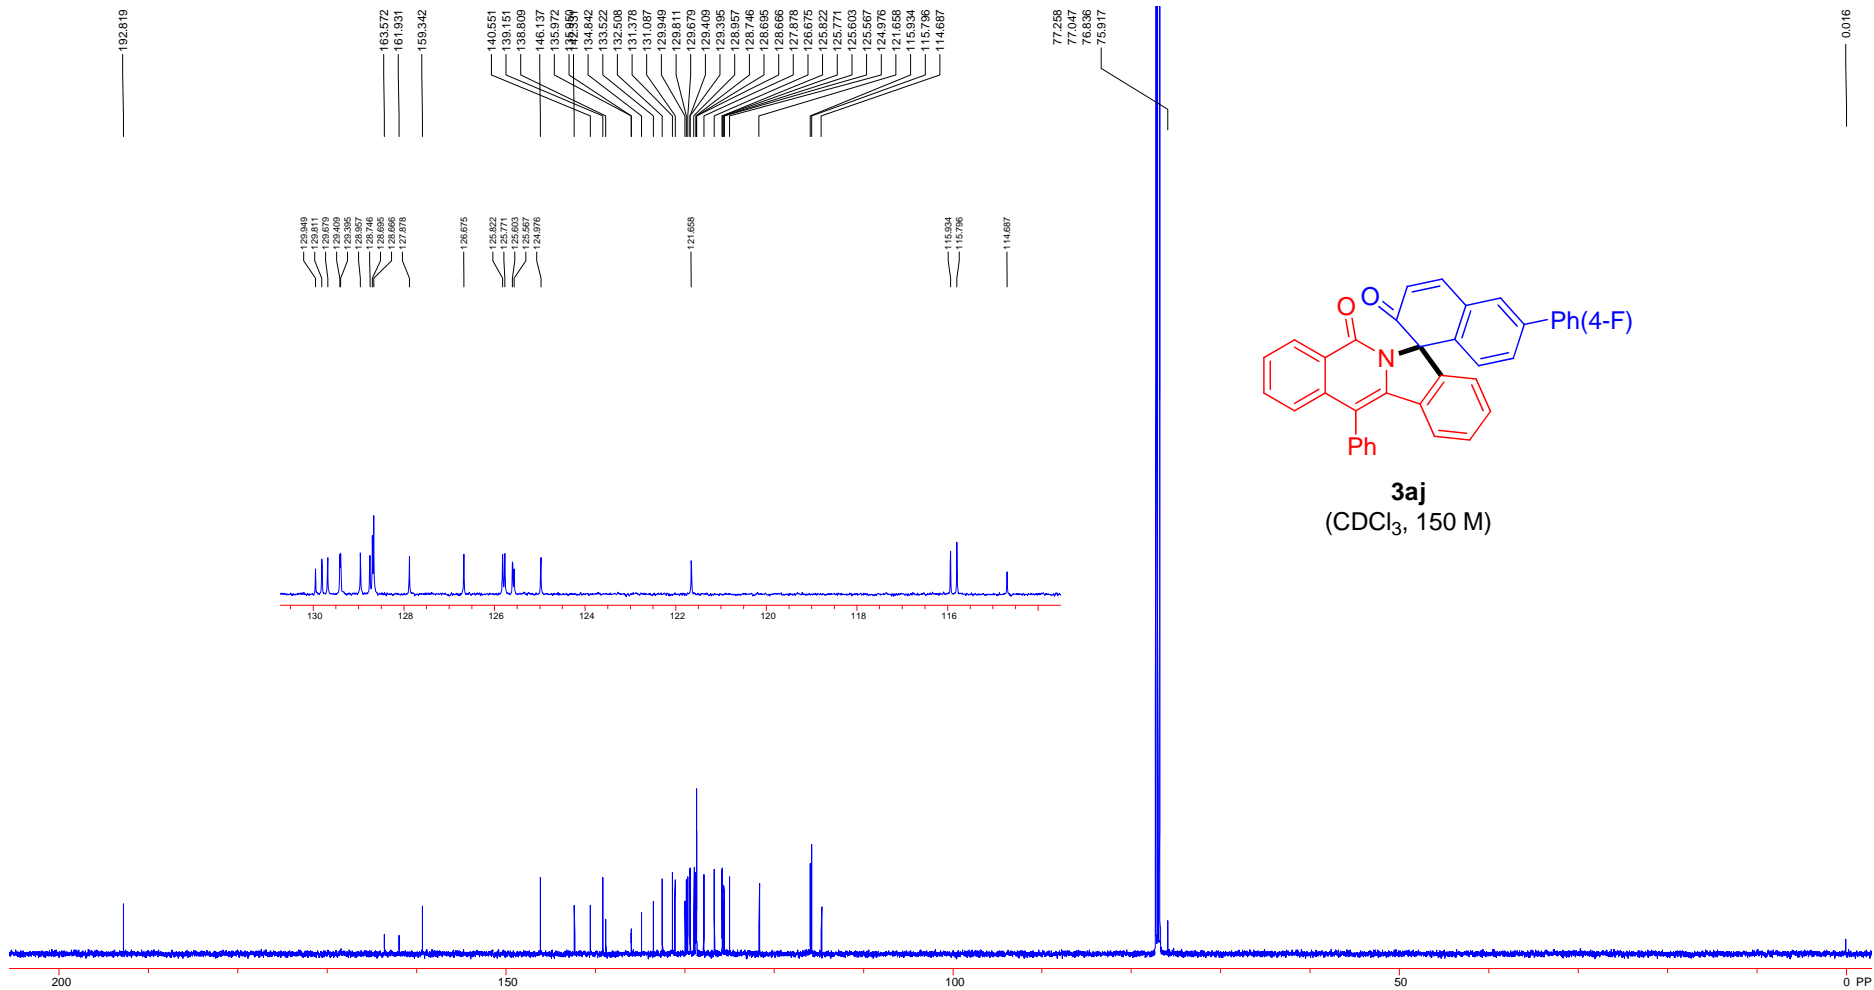

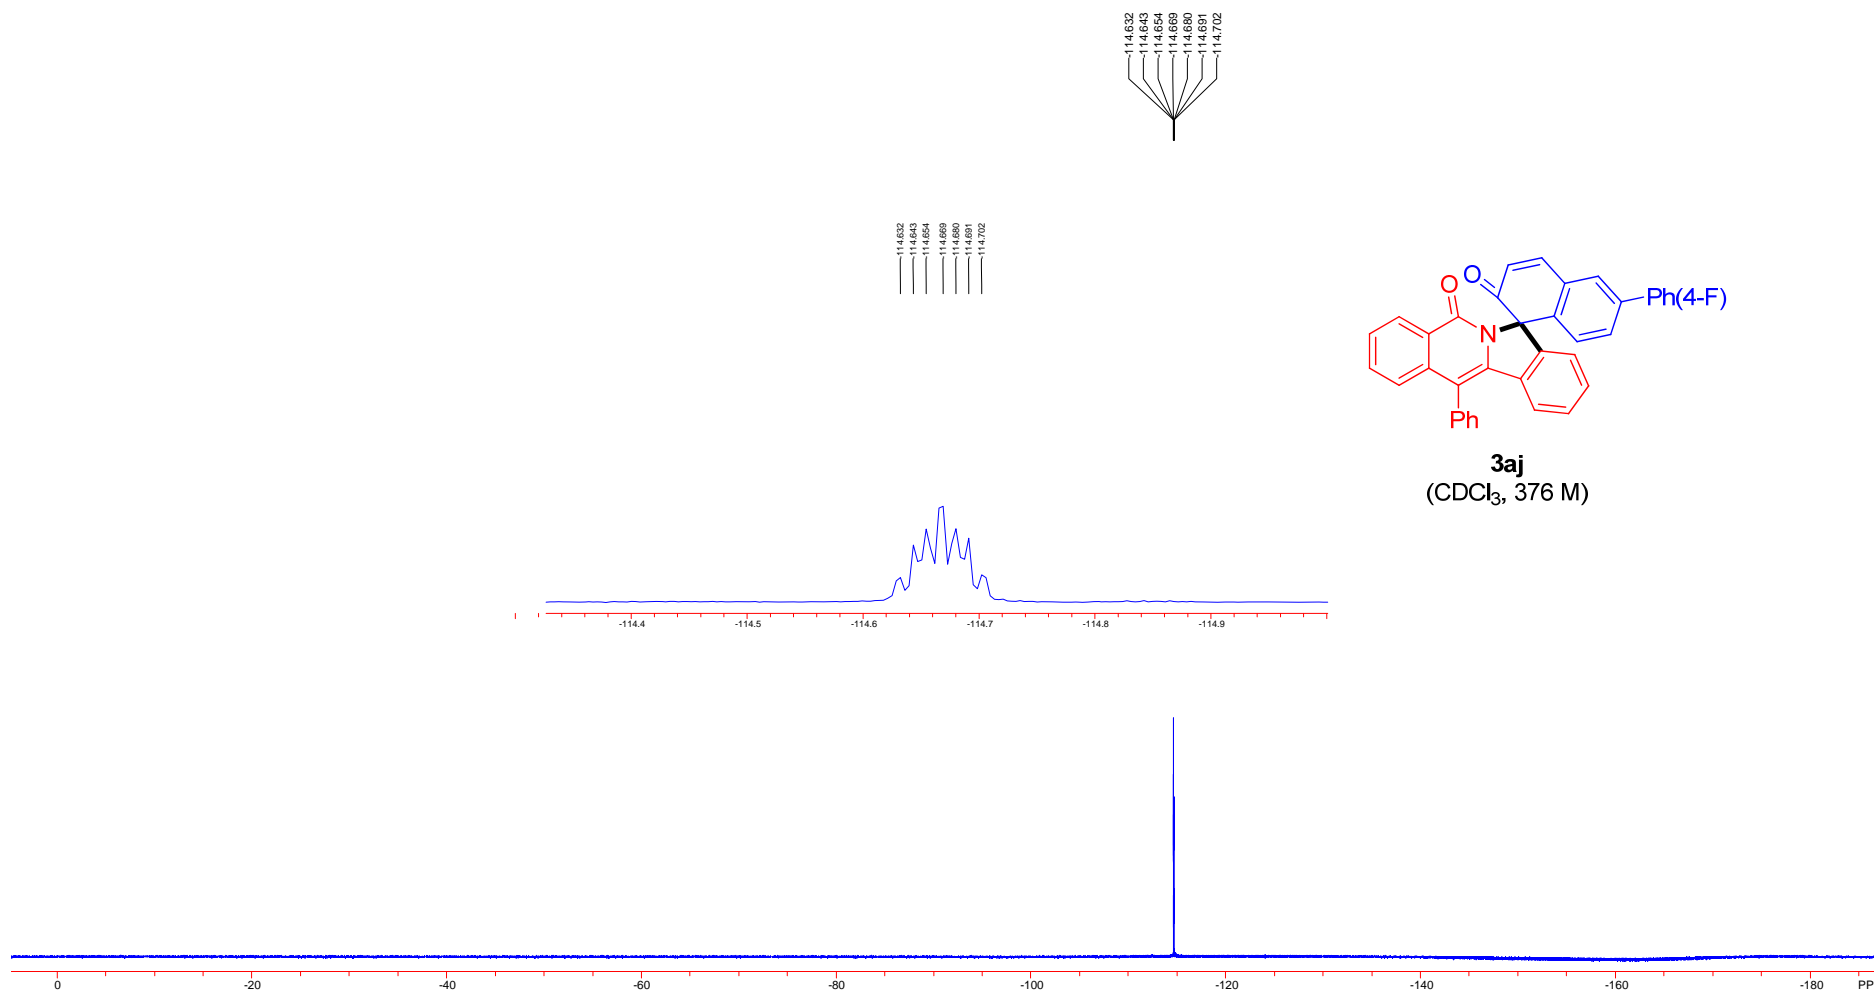

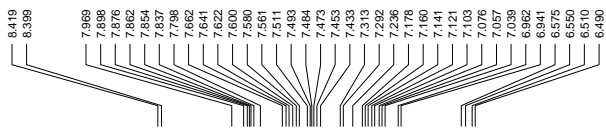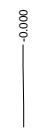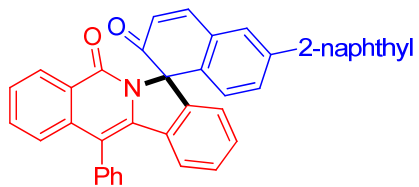

**3ak**  
(CDCl<sub>3</sub>, 400 M)

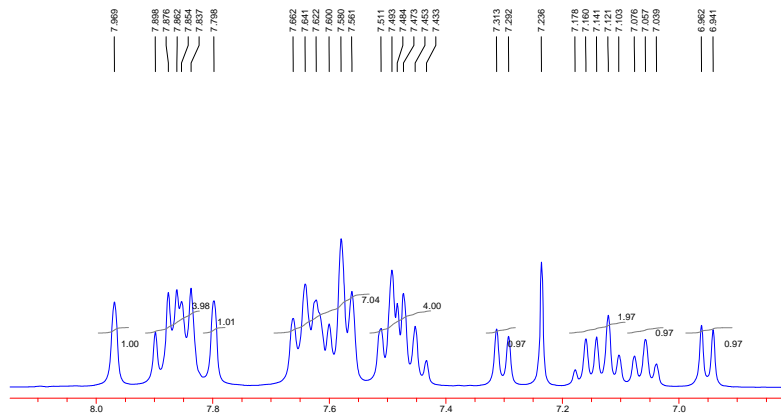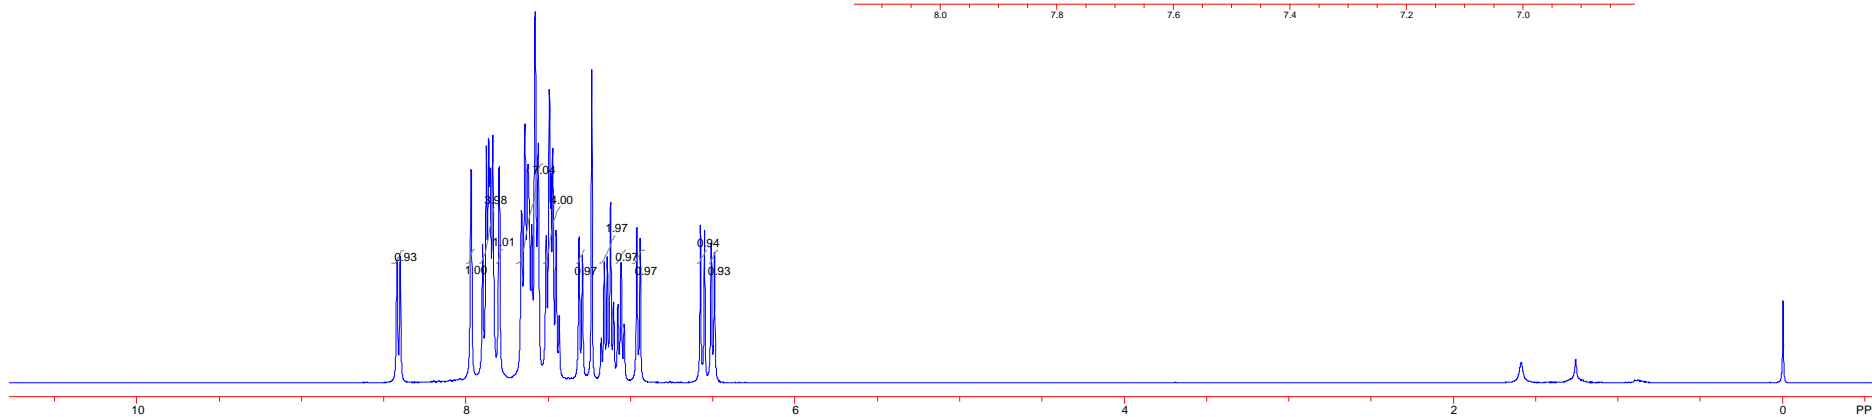

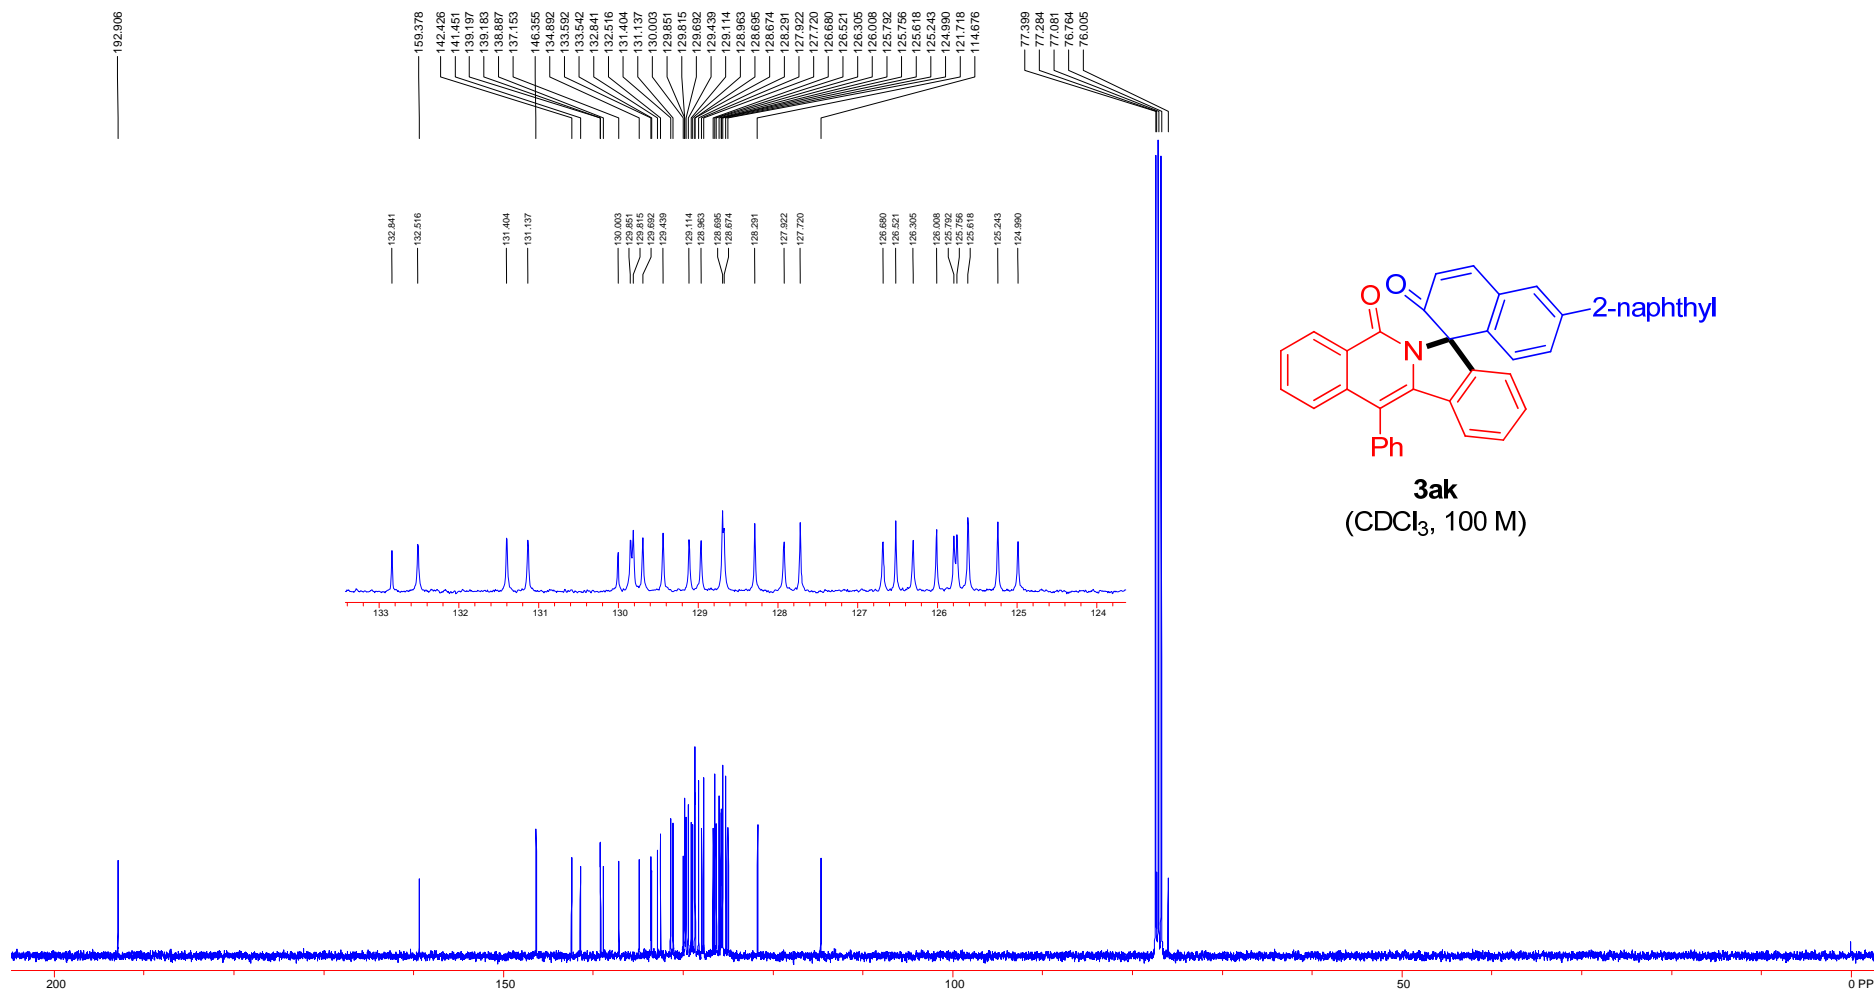



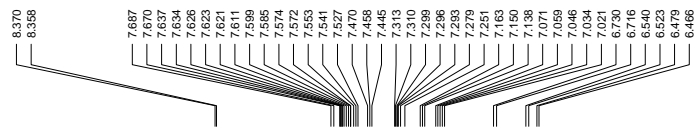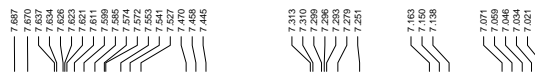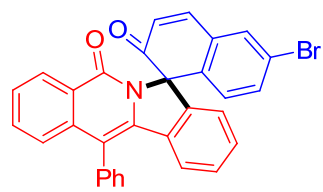

**3aI**  
(CDCl<sub>3</sub>, 600 M)

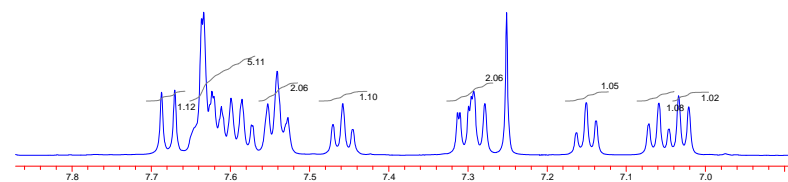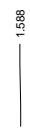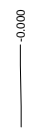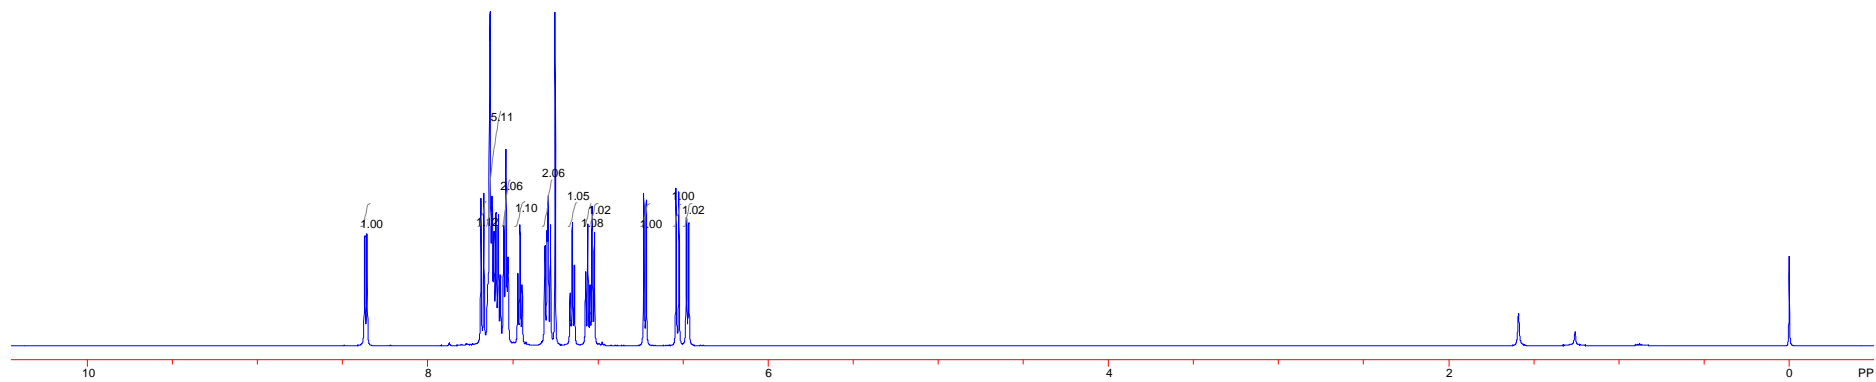

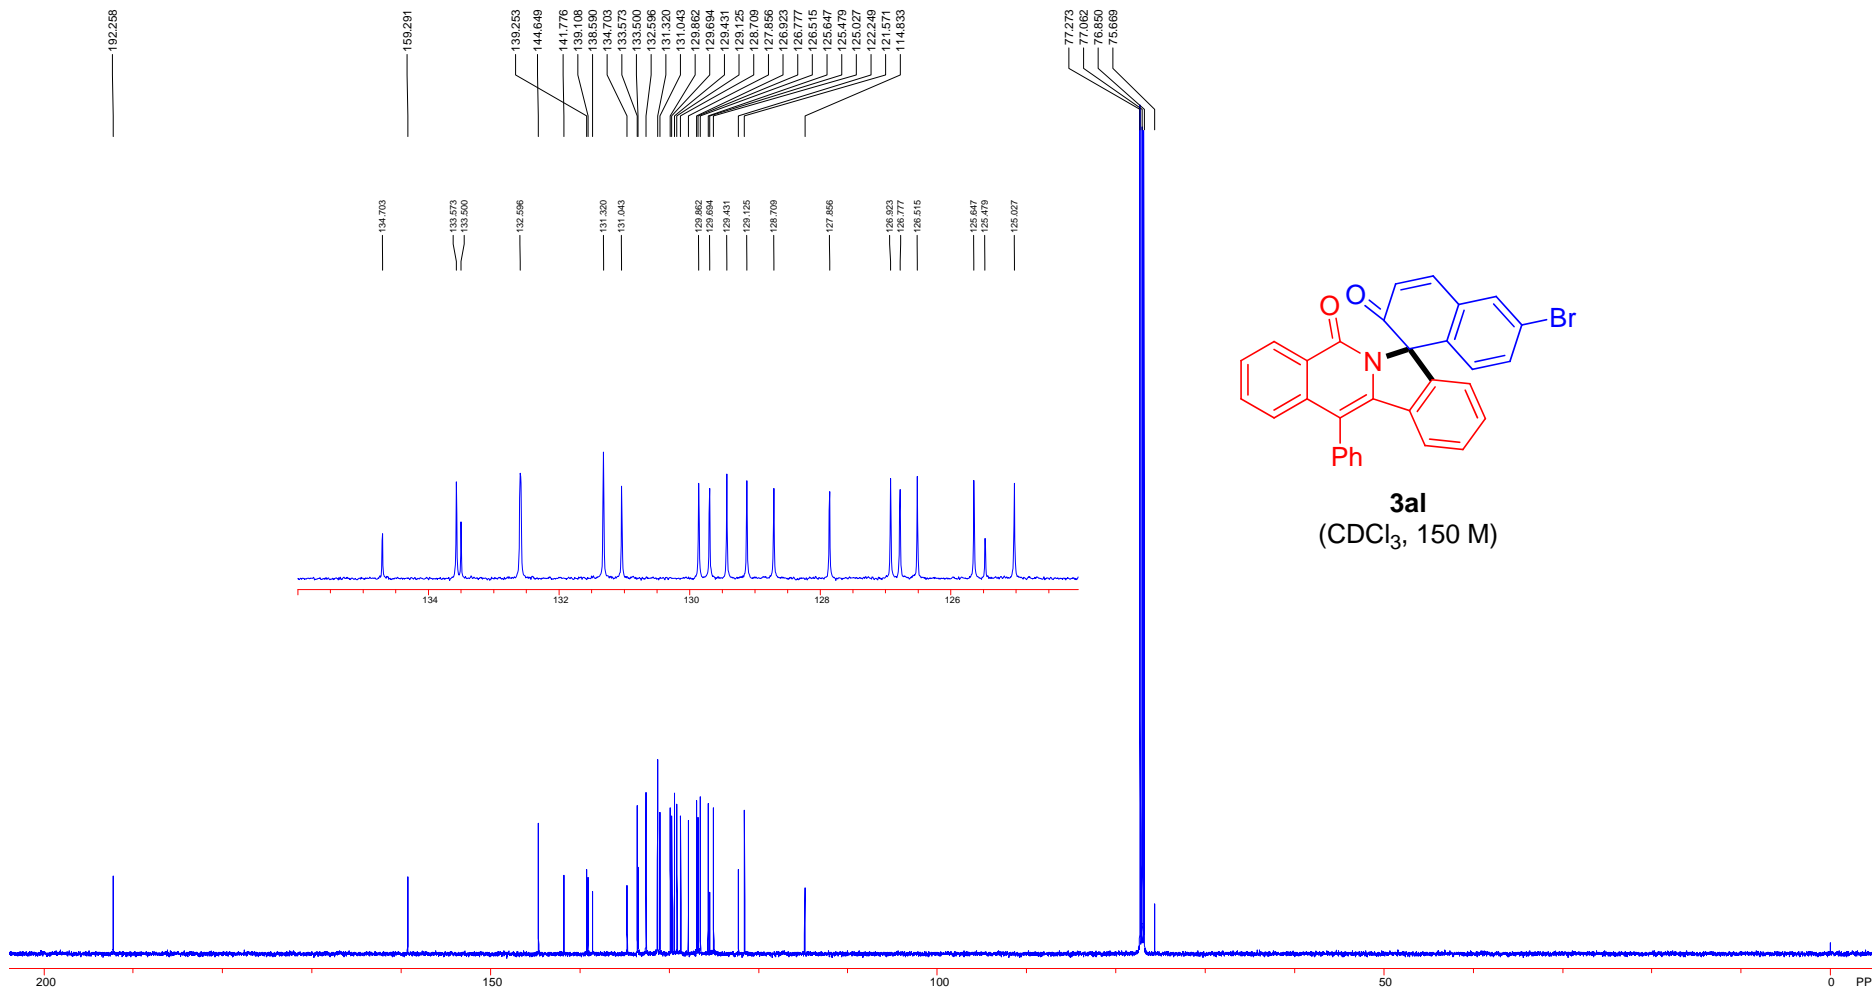

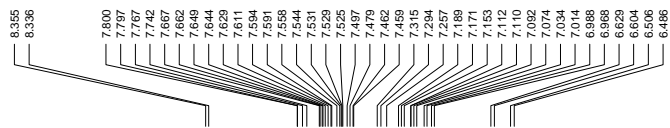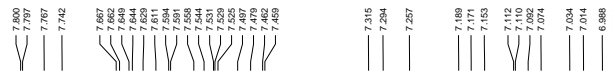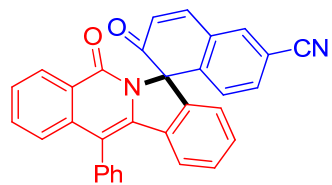

**3am**  
(CDCl<sub>3</sub>, 400 M)

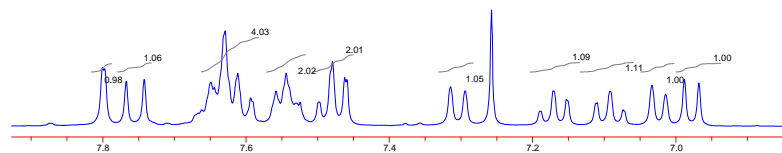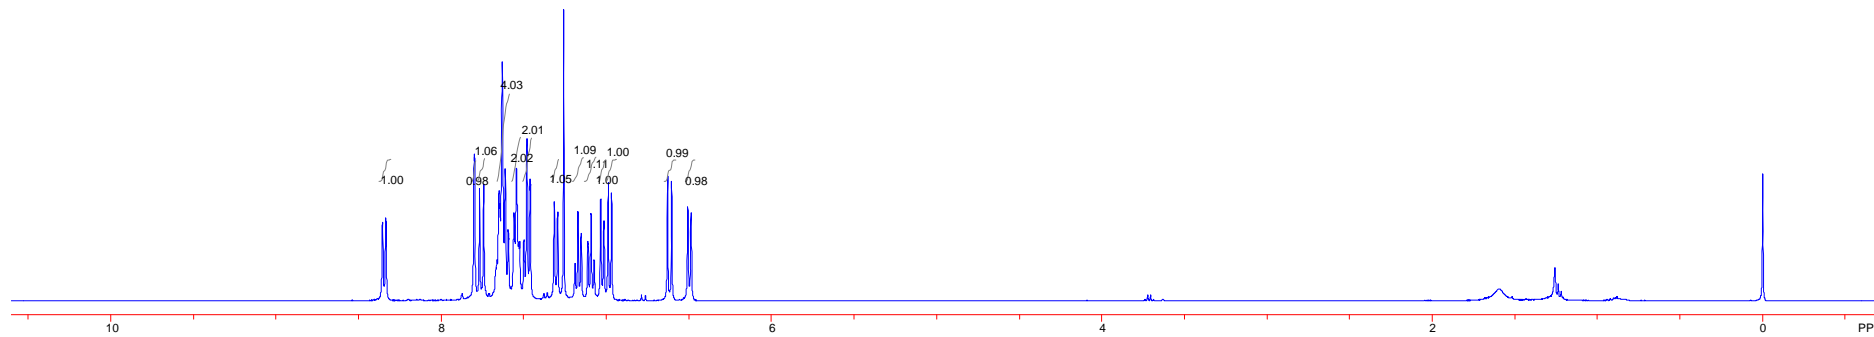

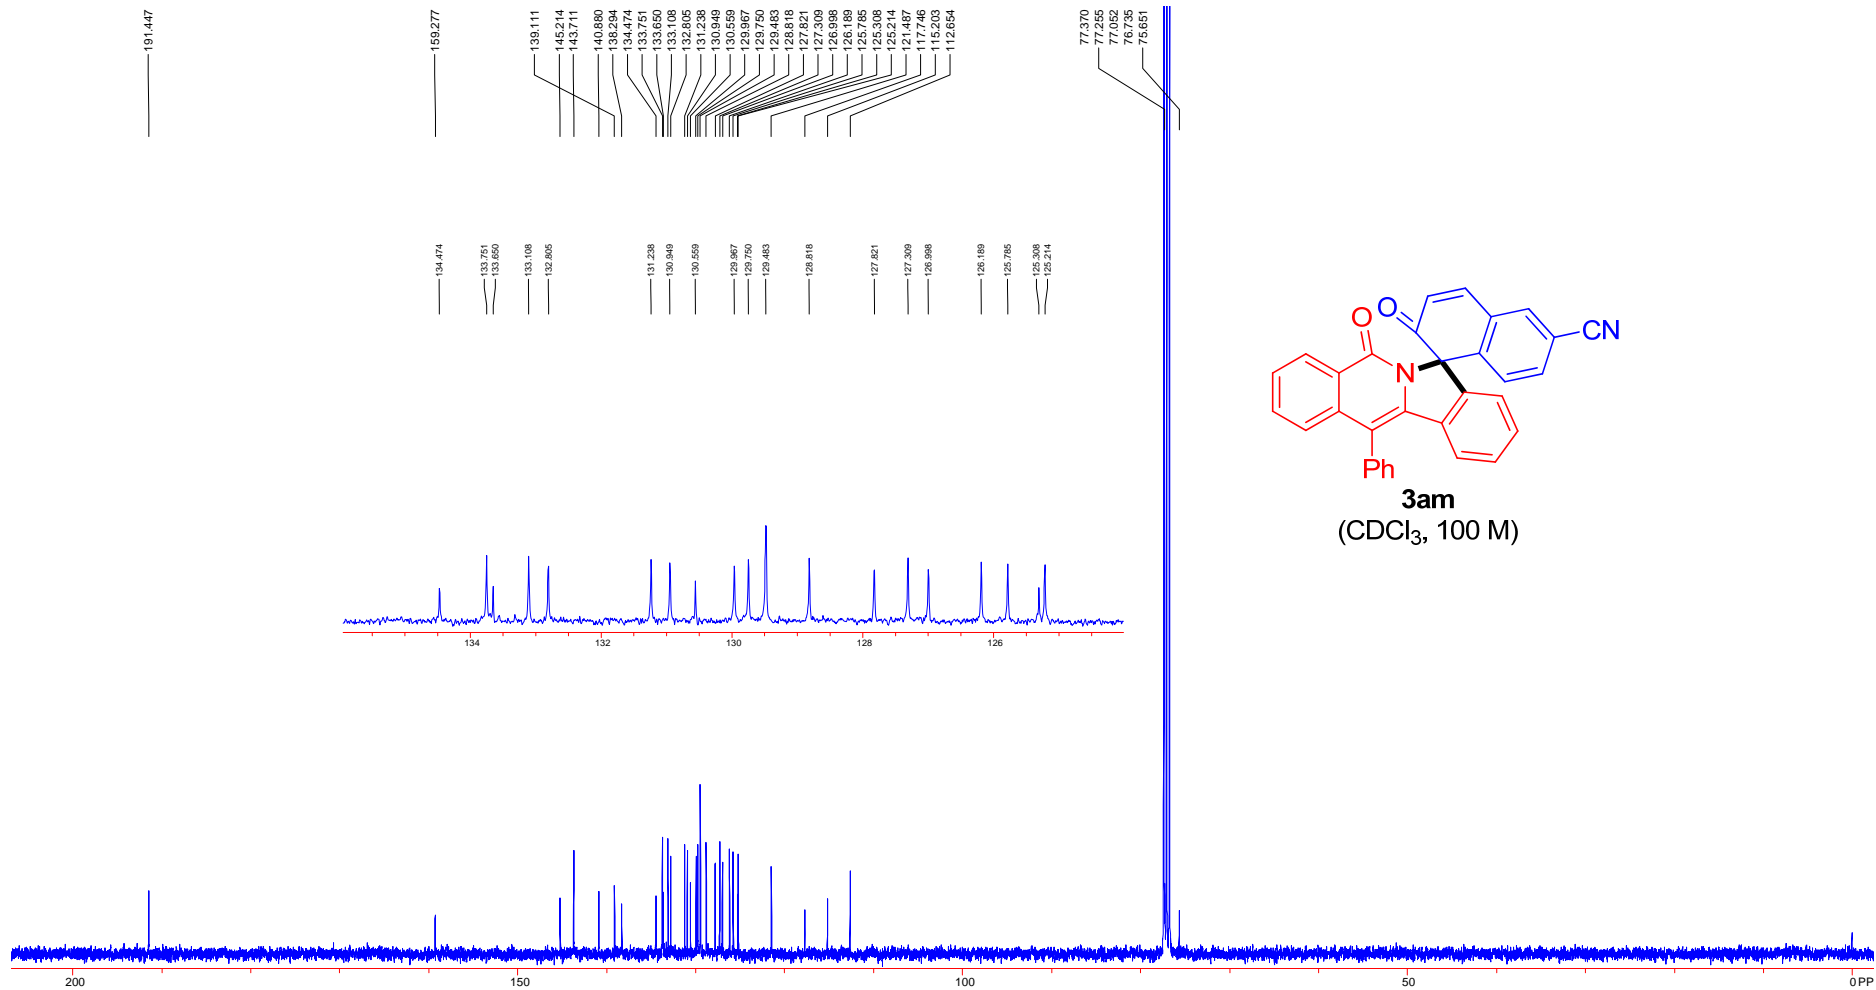

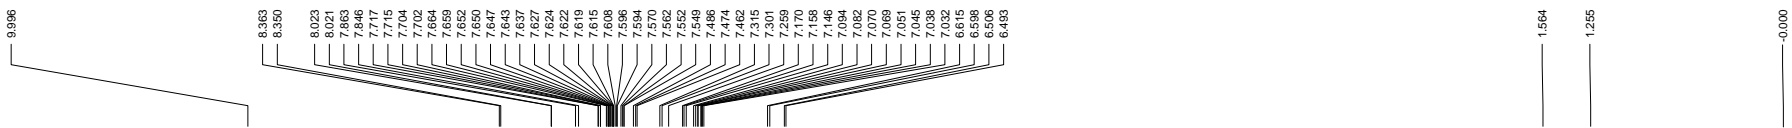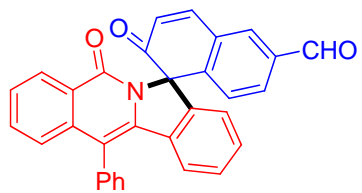

**3an**  
(CDCl<sub>3</sub>, 600 M)

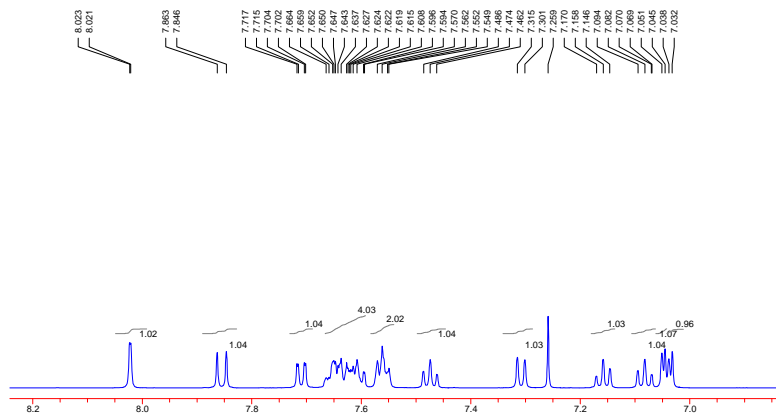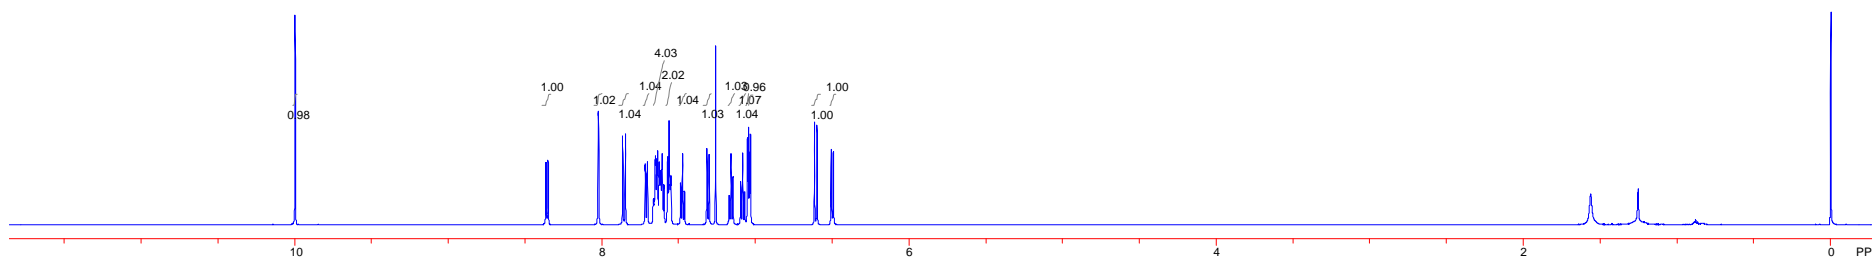

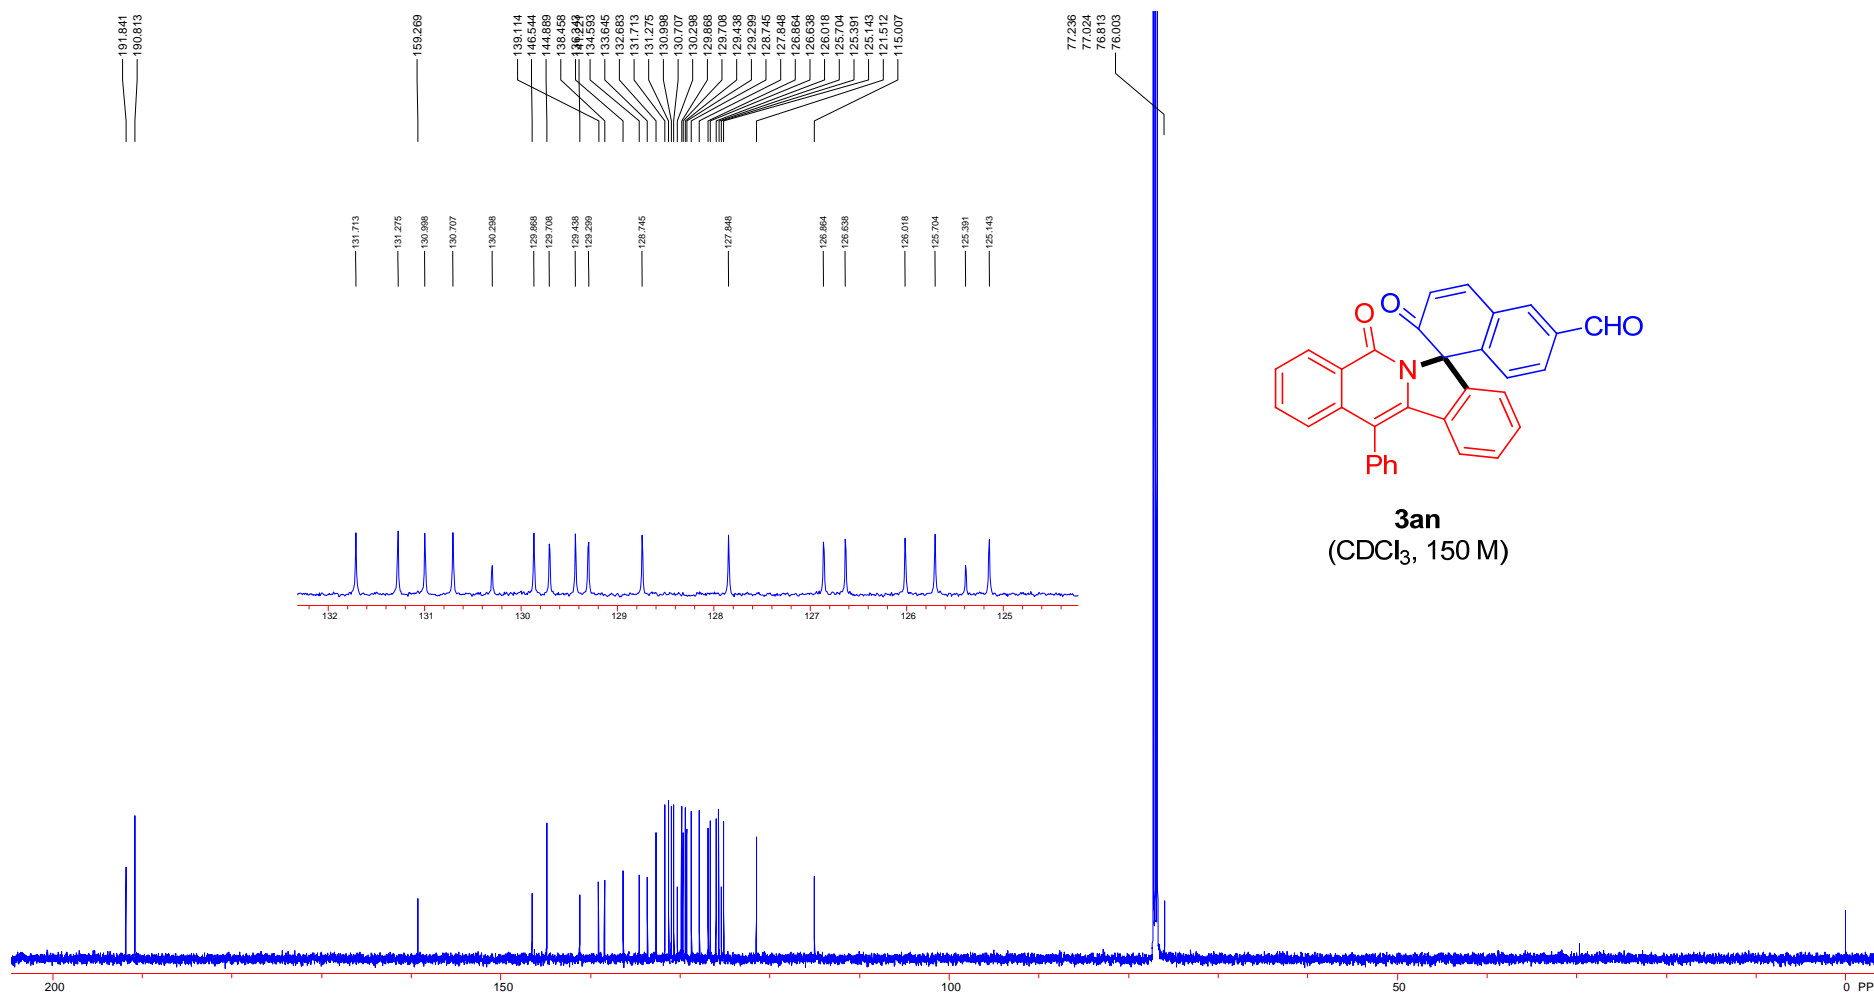

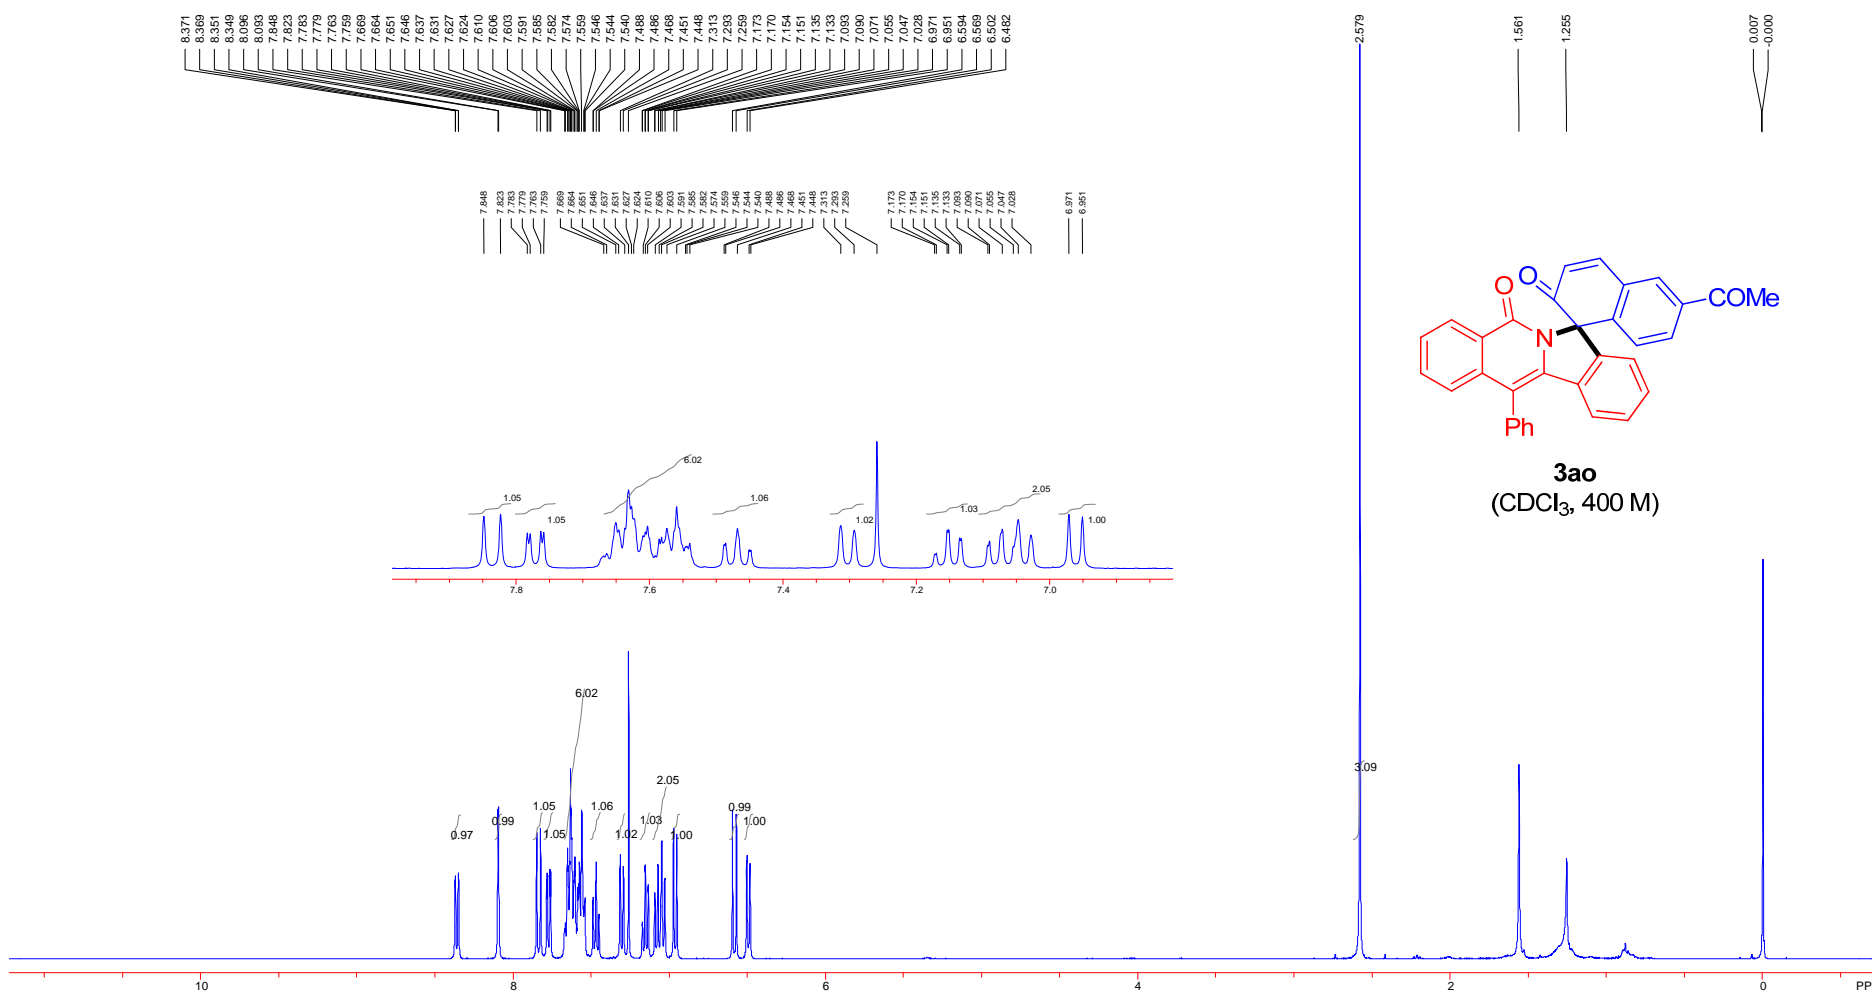

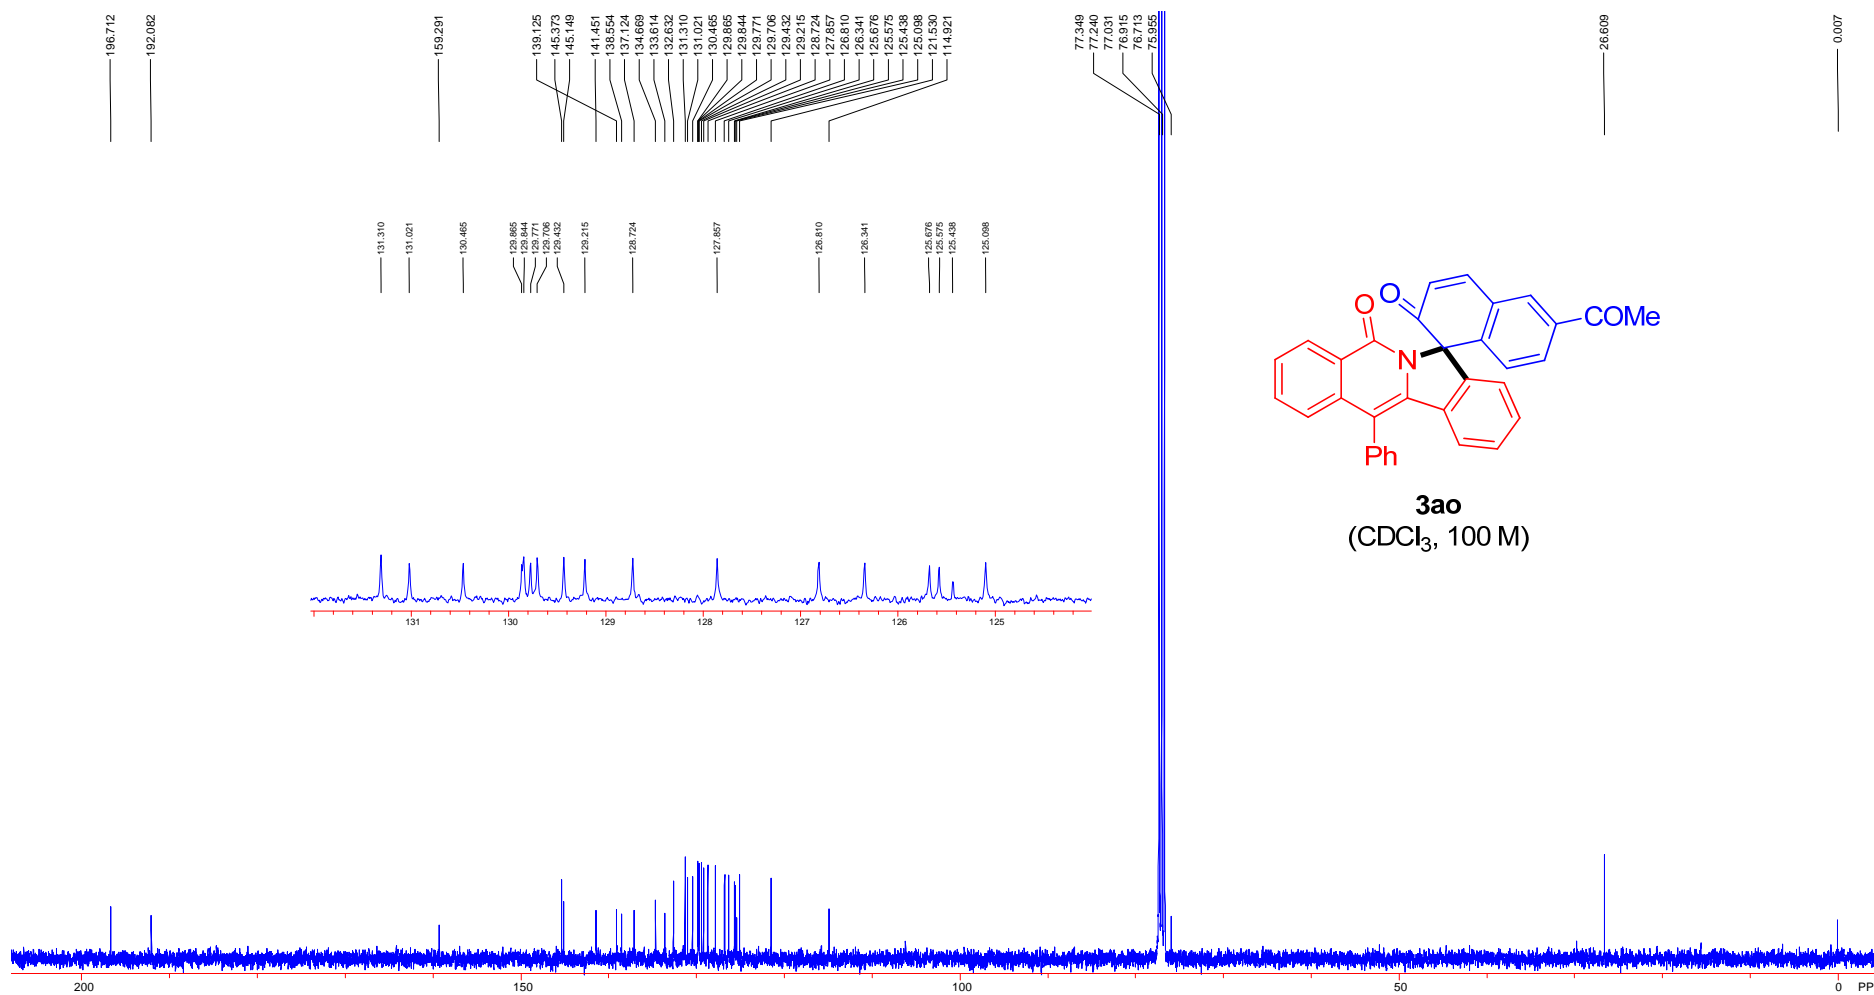



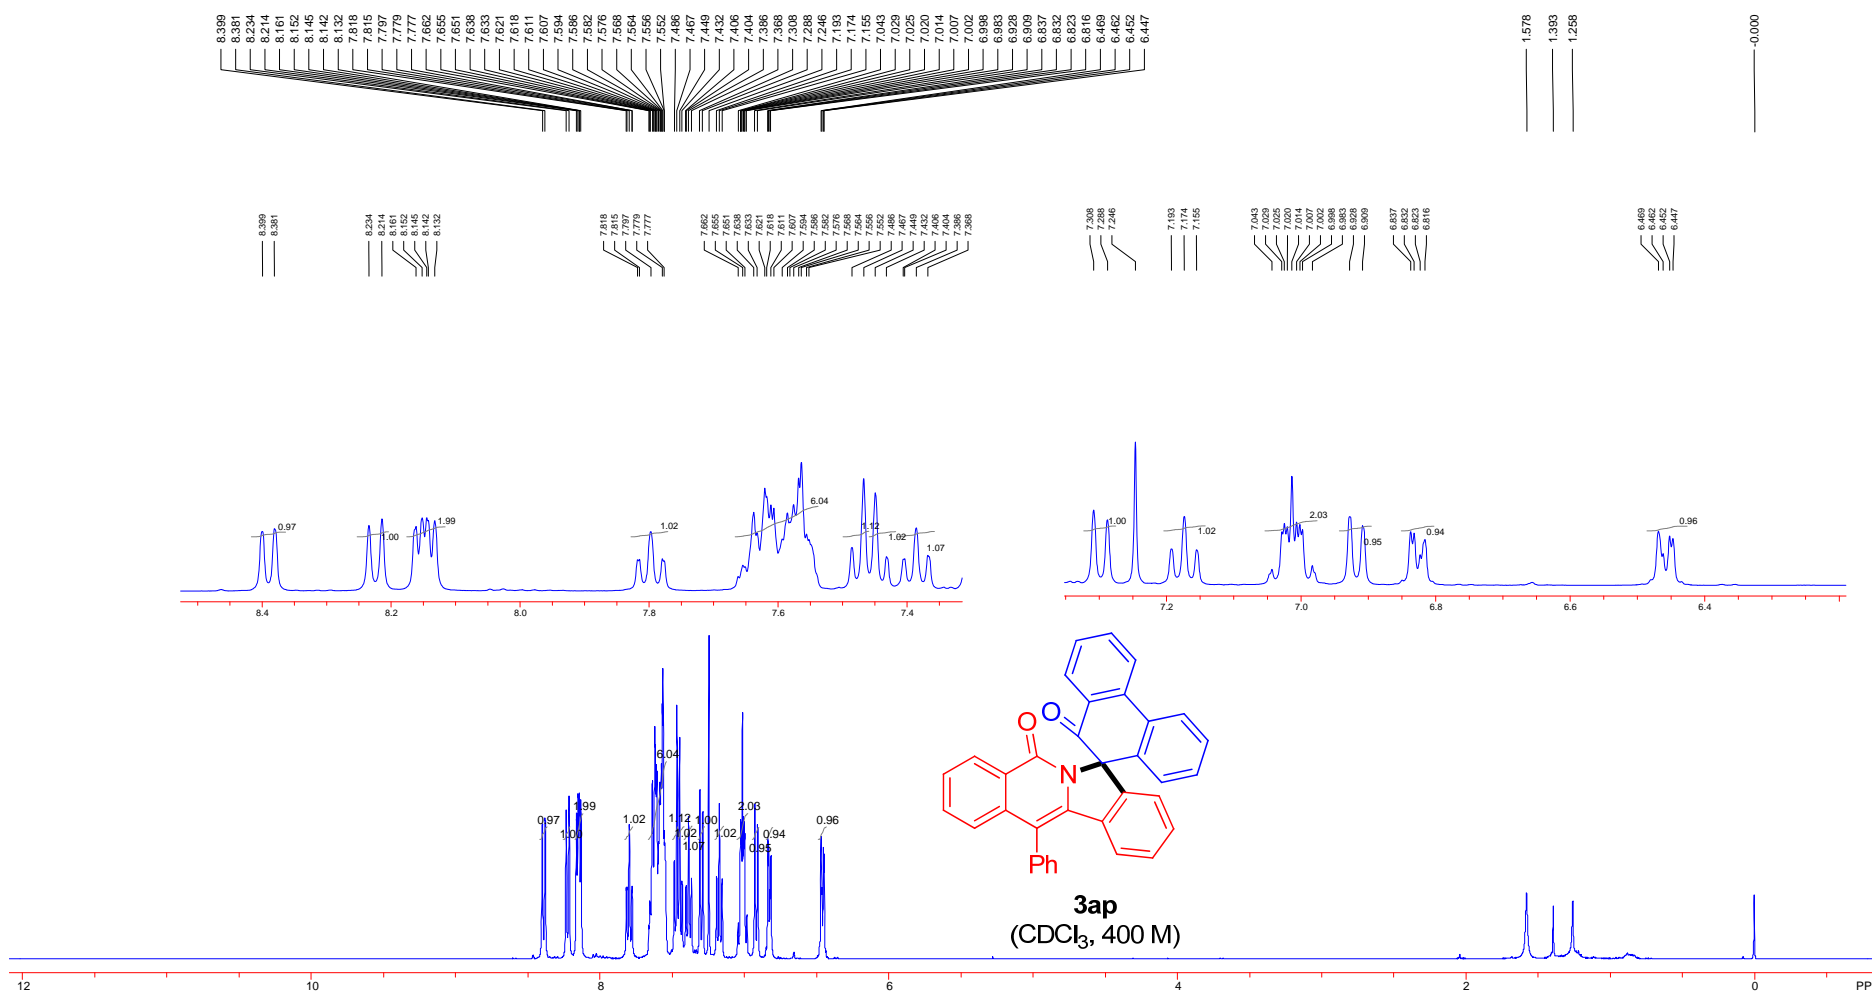

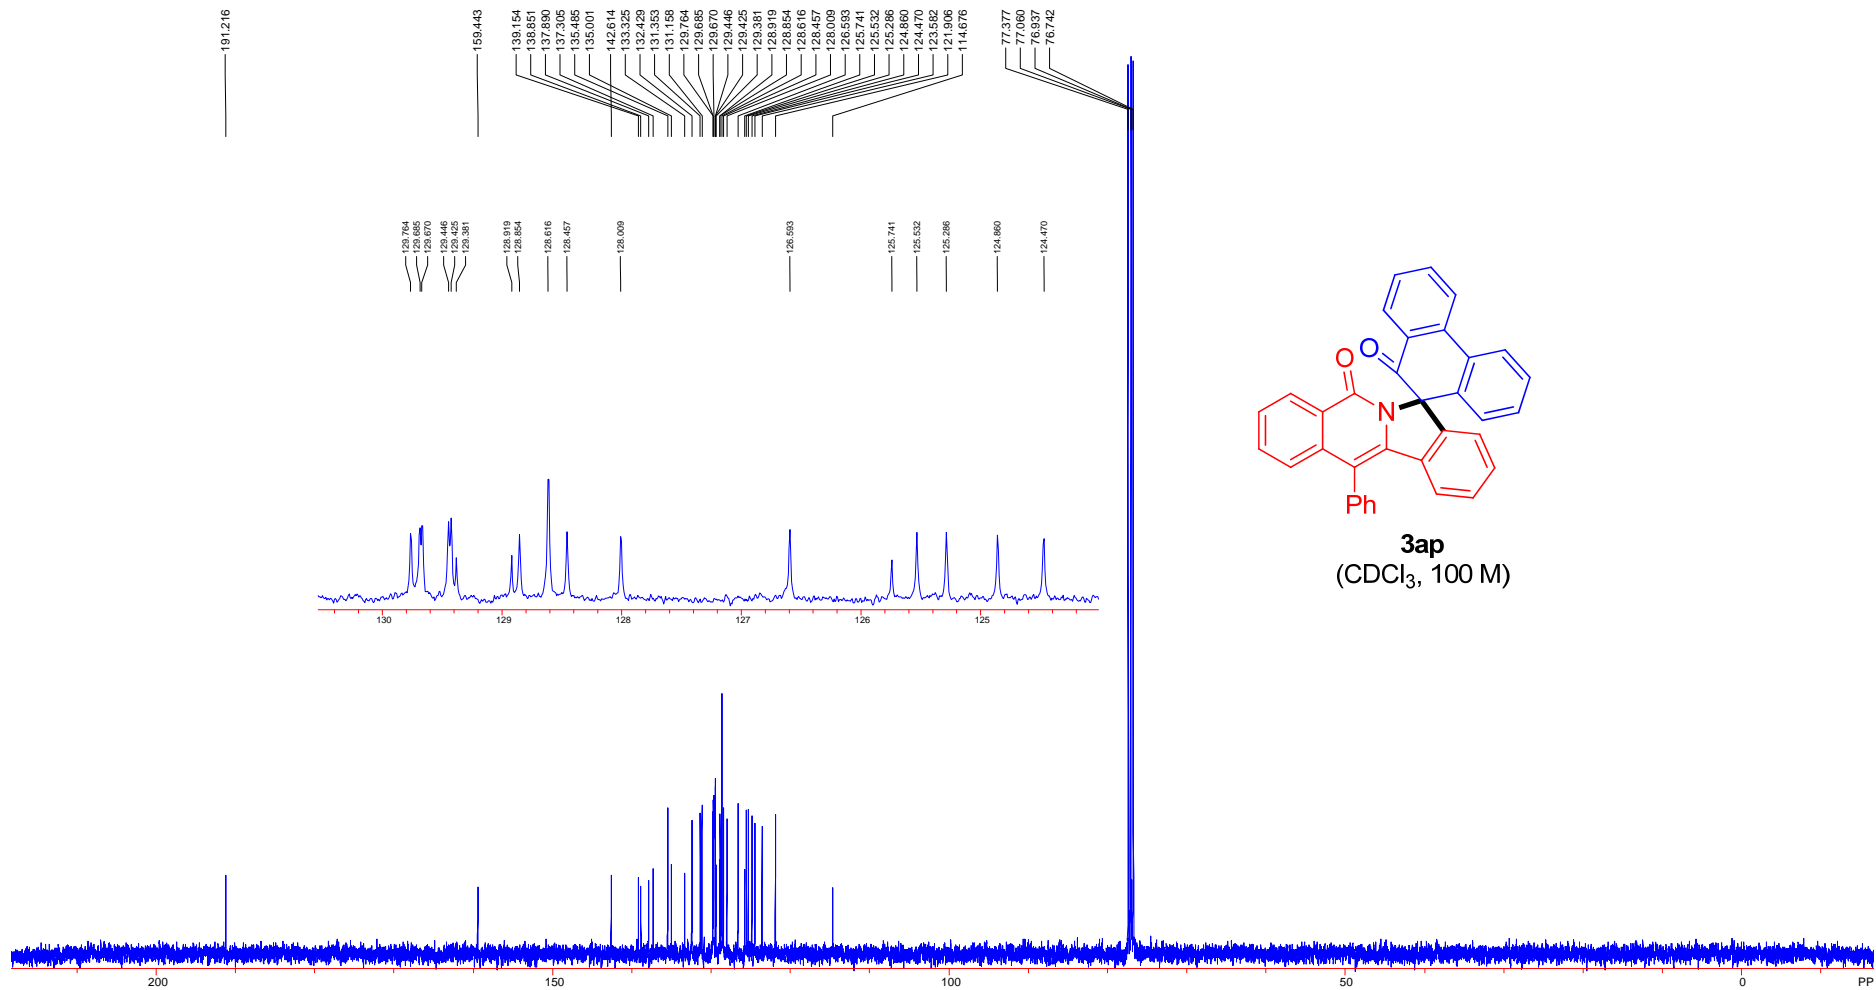

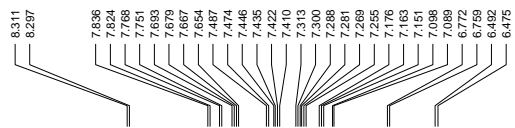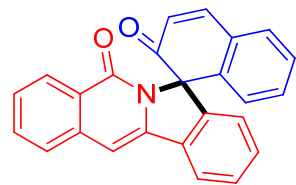

**5a**  
(CDCl<sub>3</sub>, 600M)

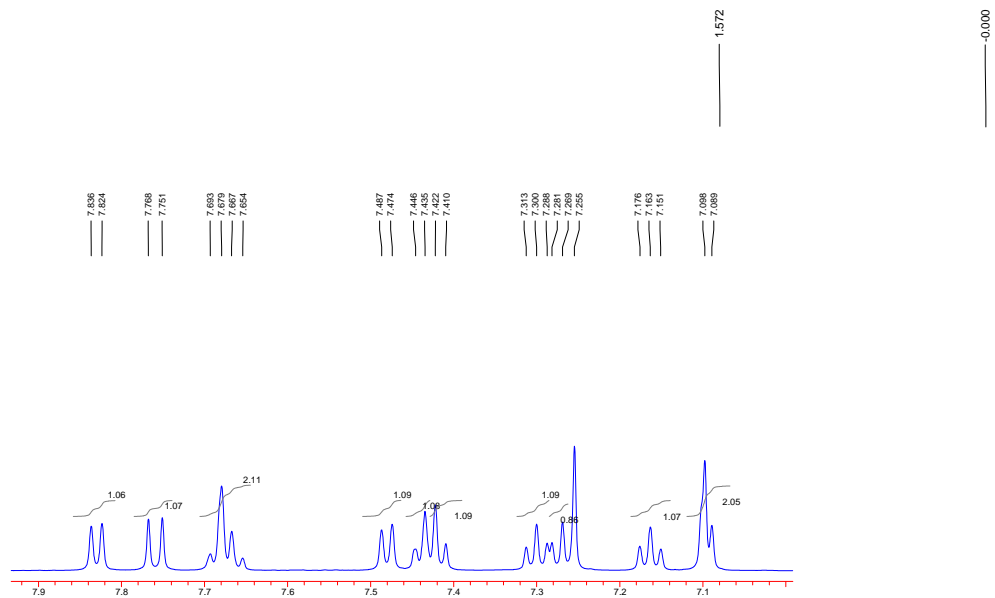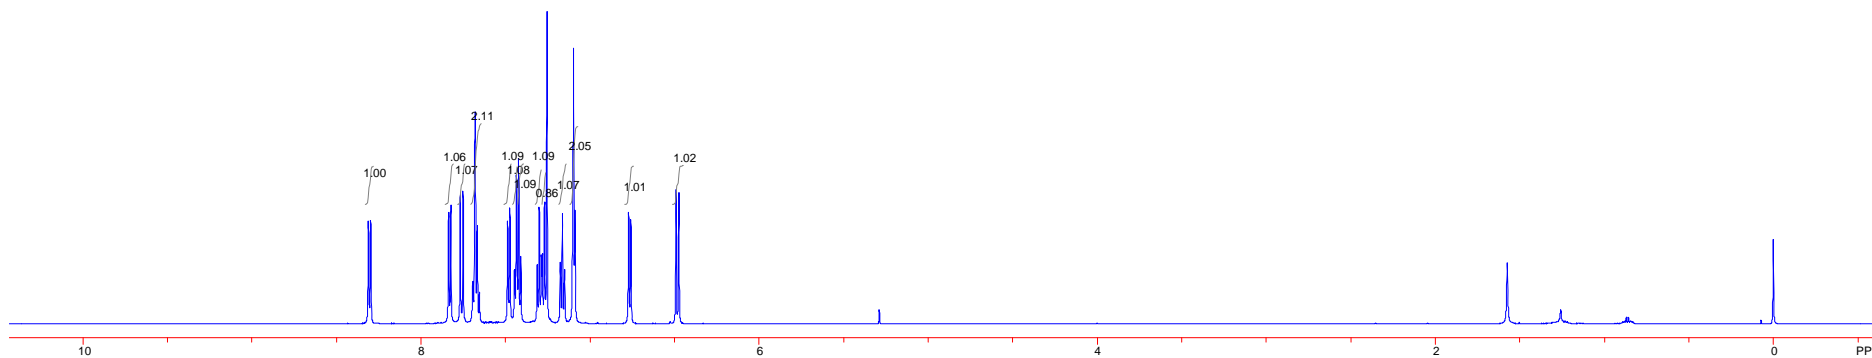

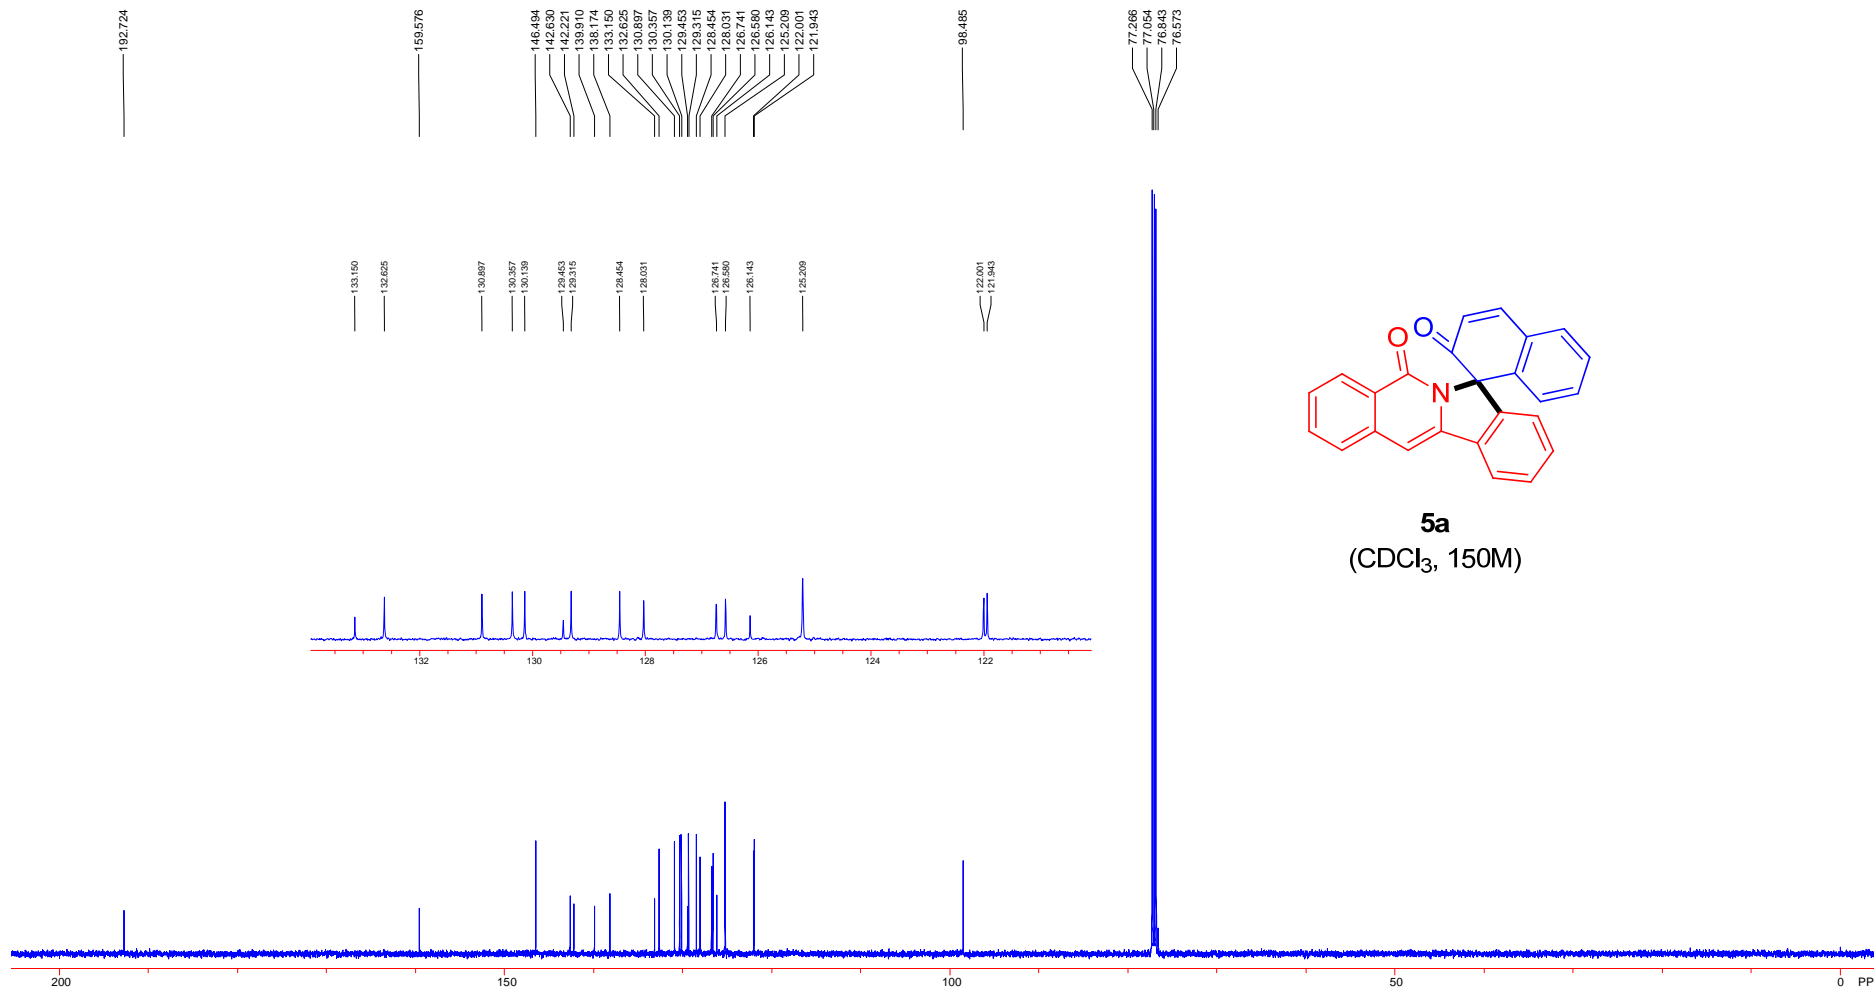

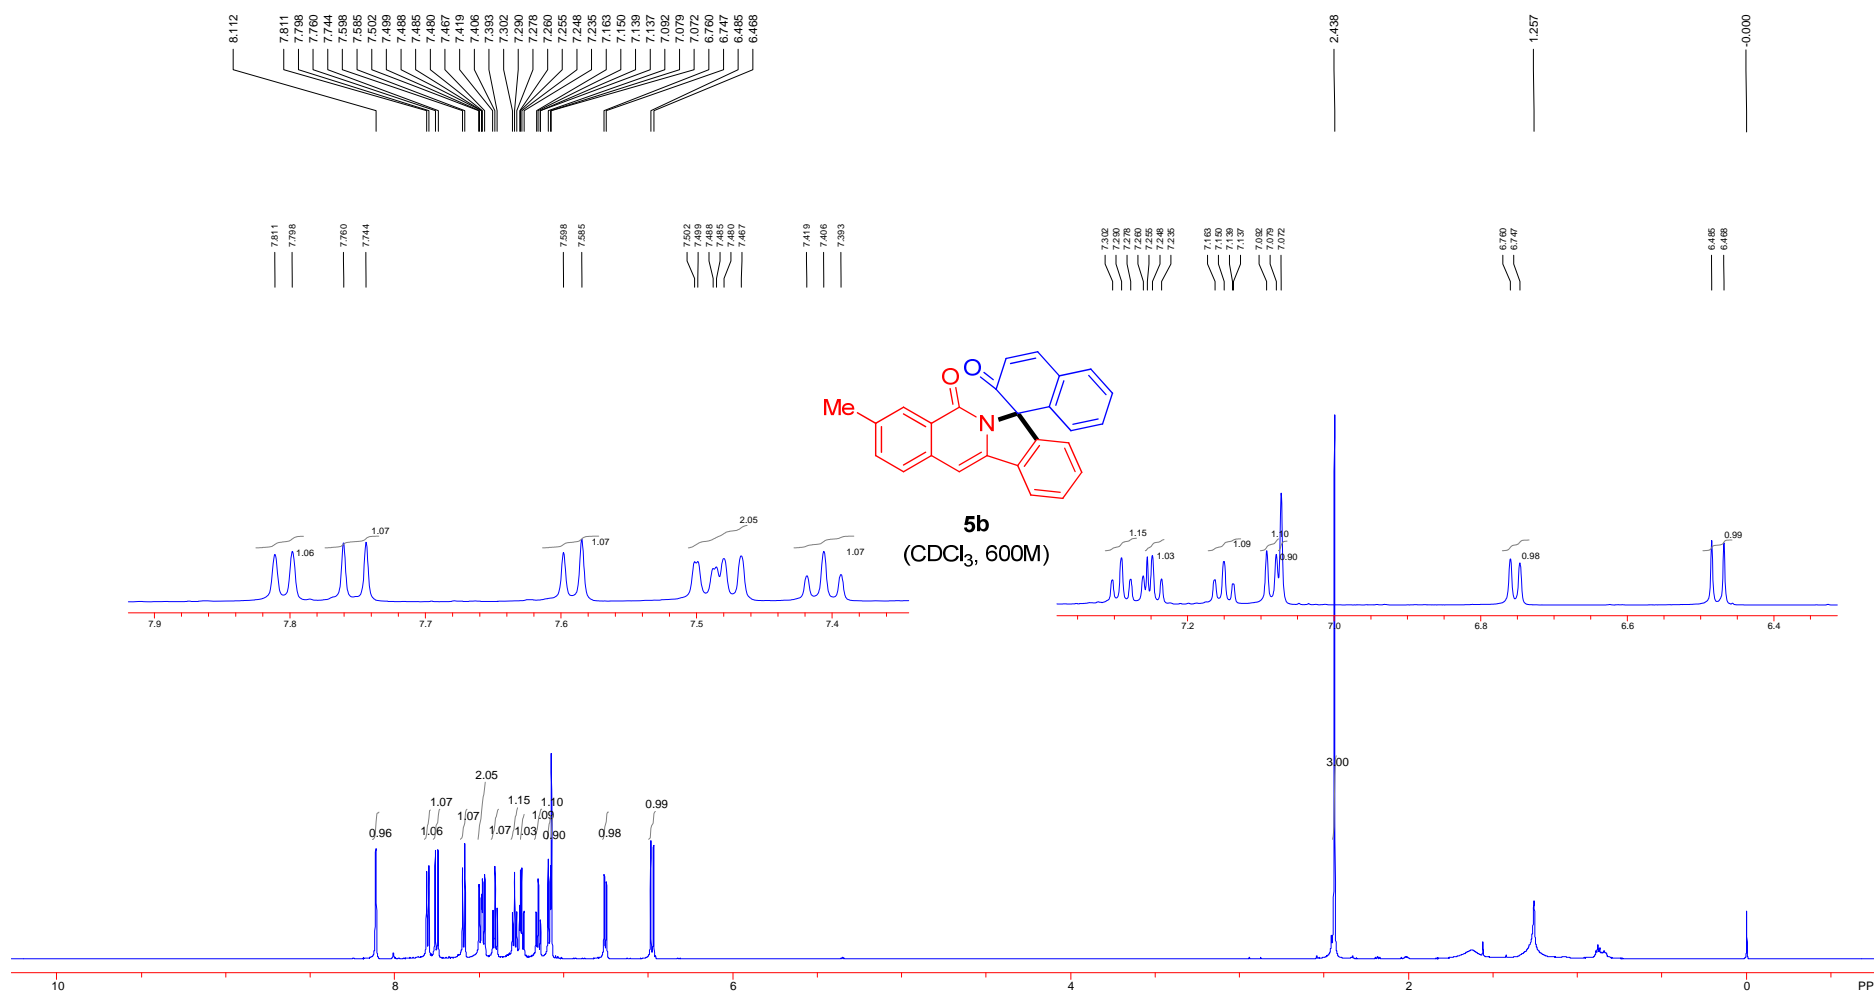

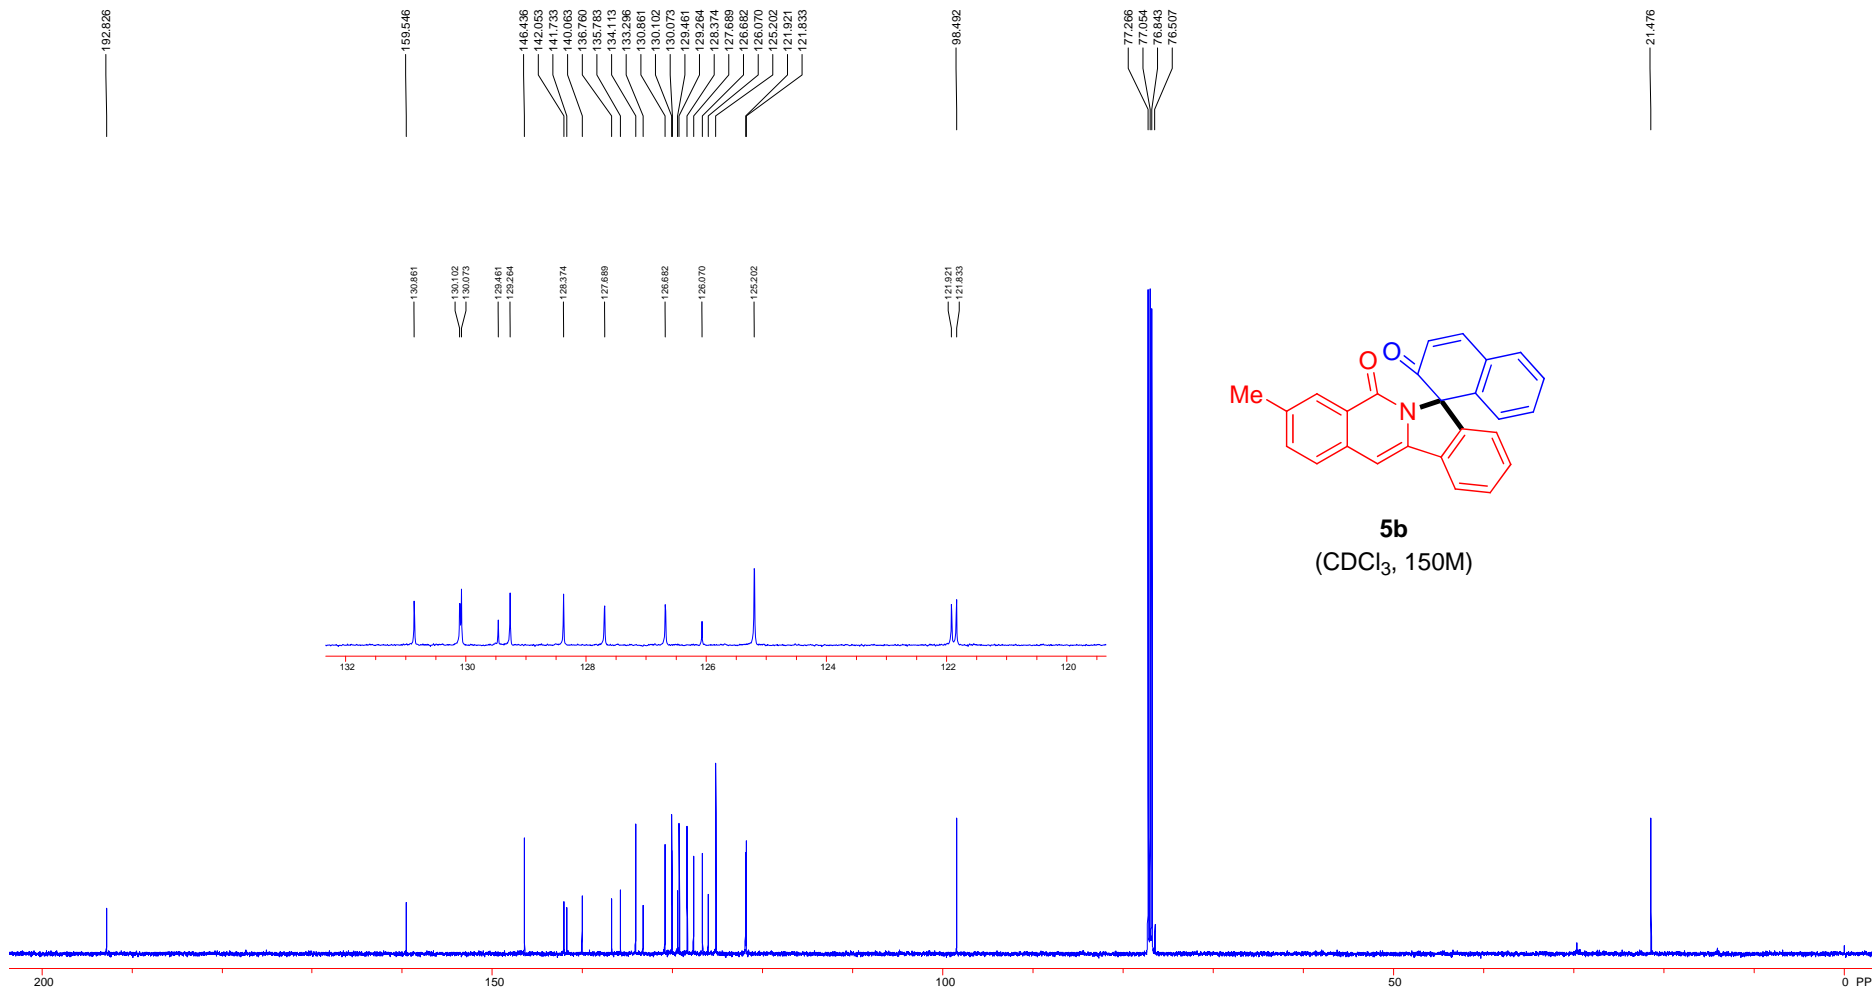

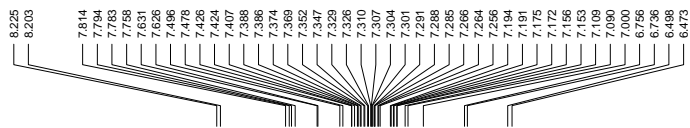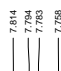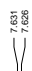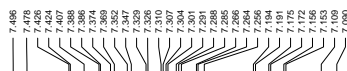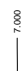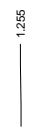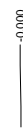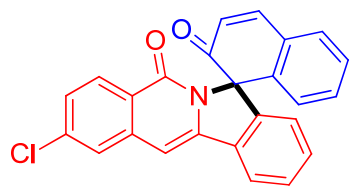

**5c**  
(CDCl<sub>3</sub>, 400M)

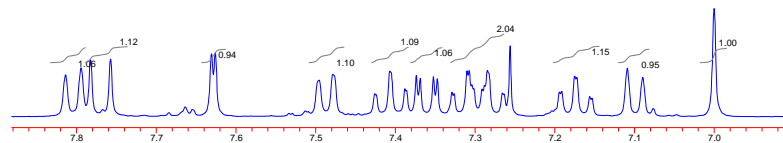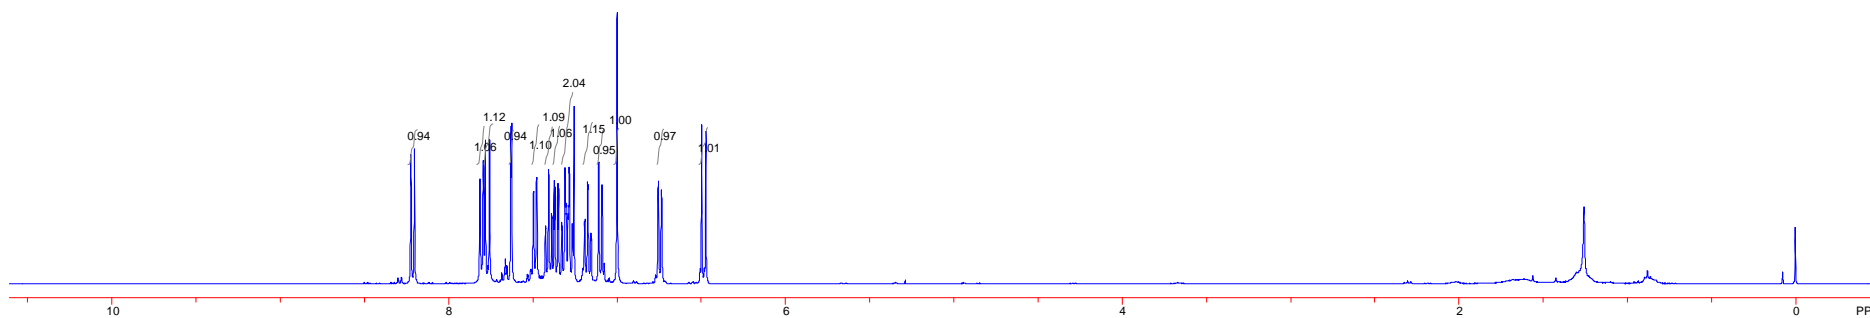

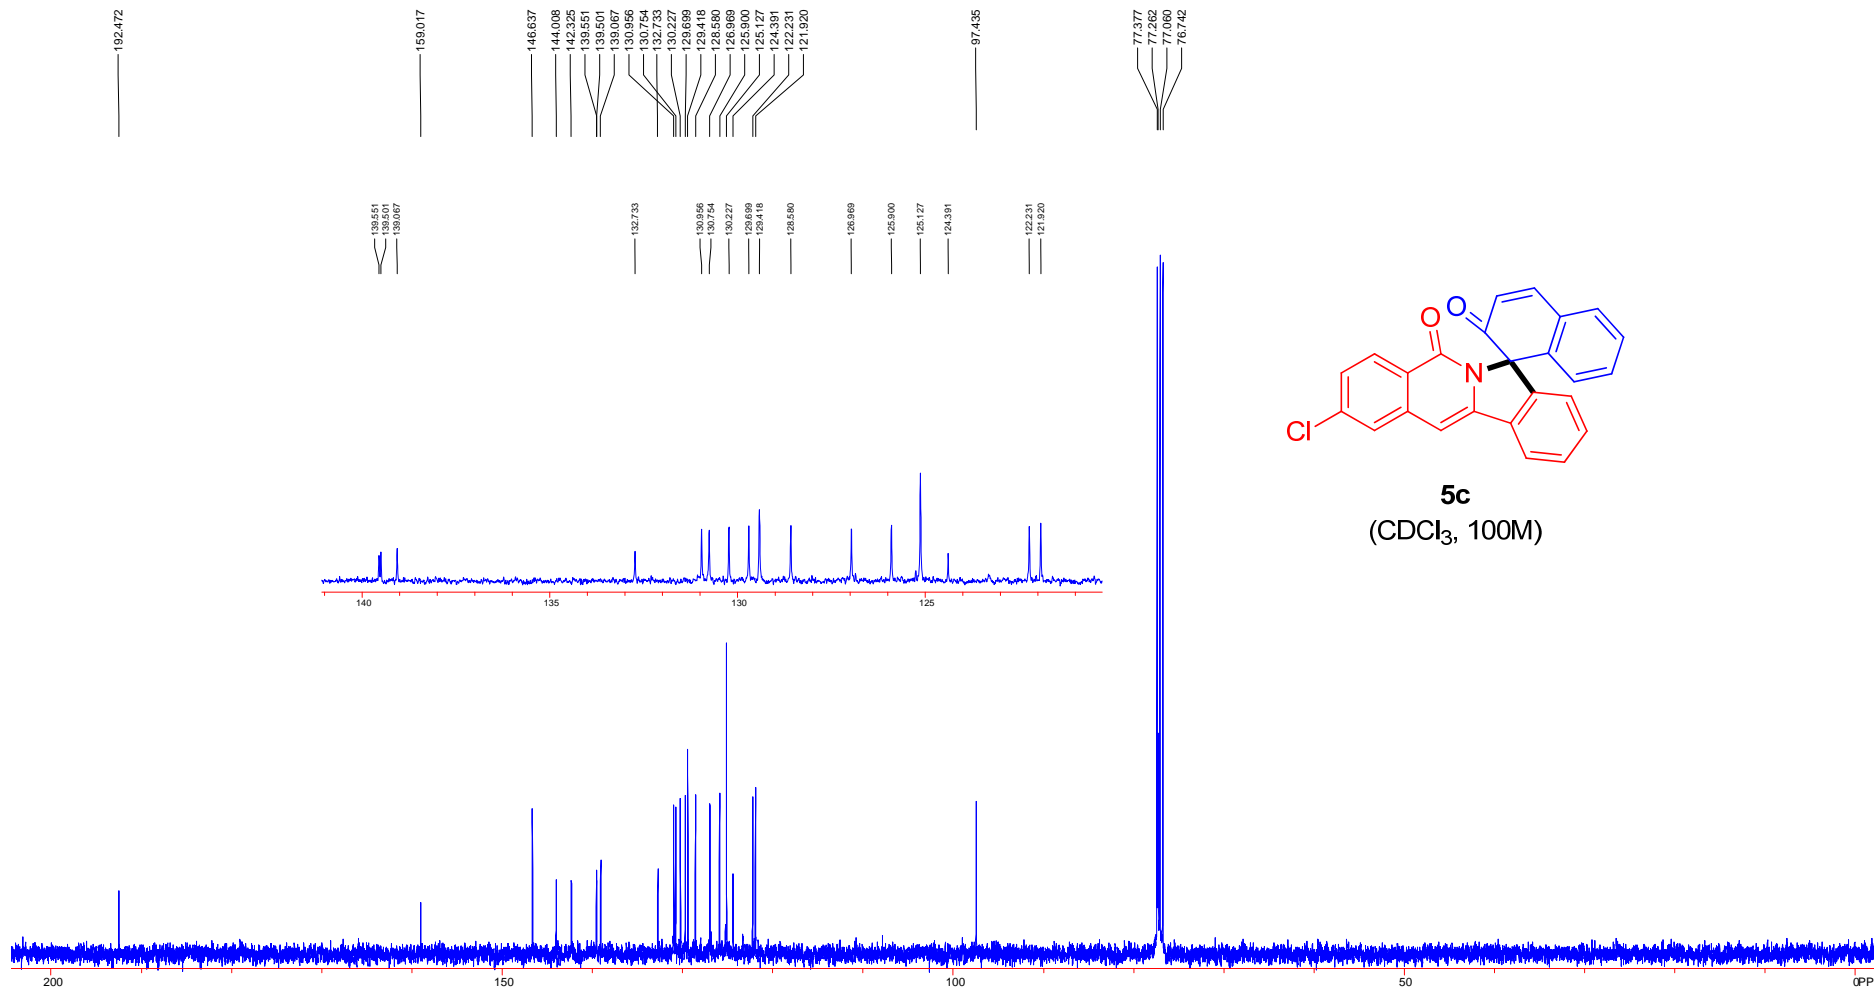



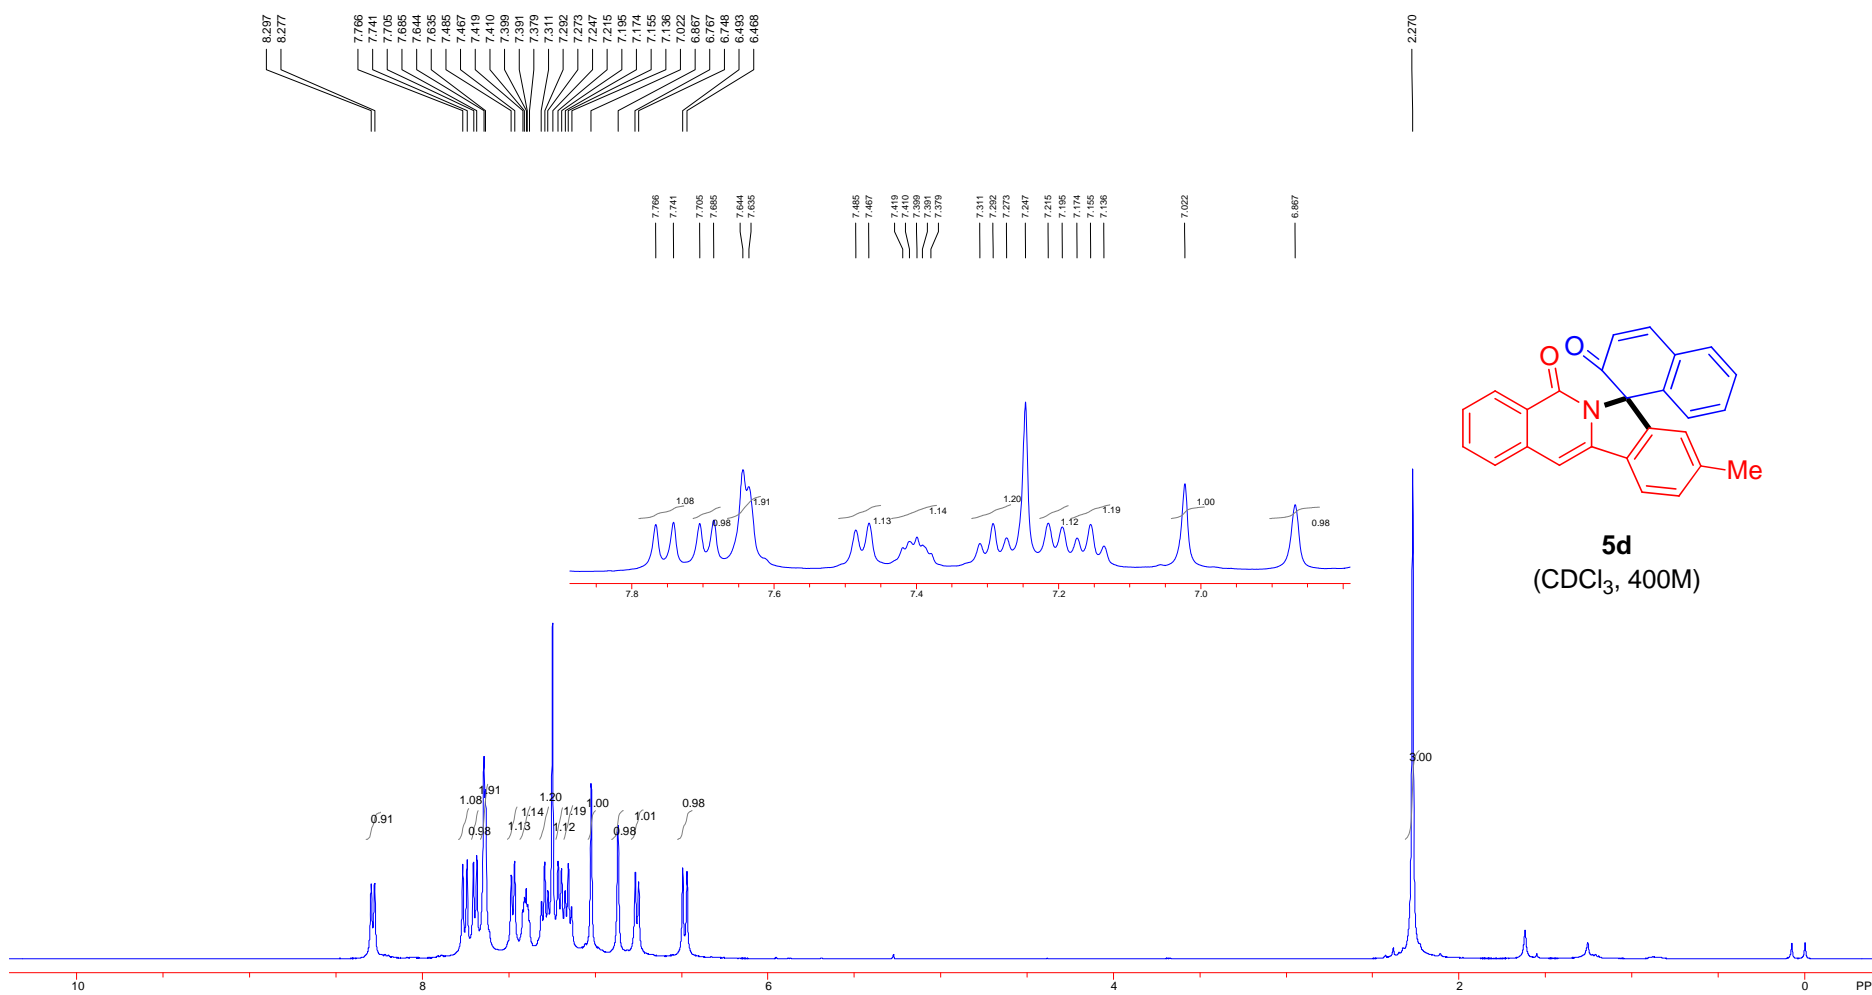

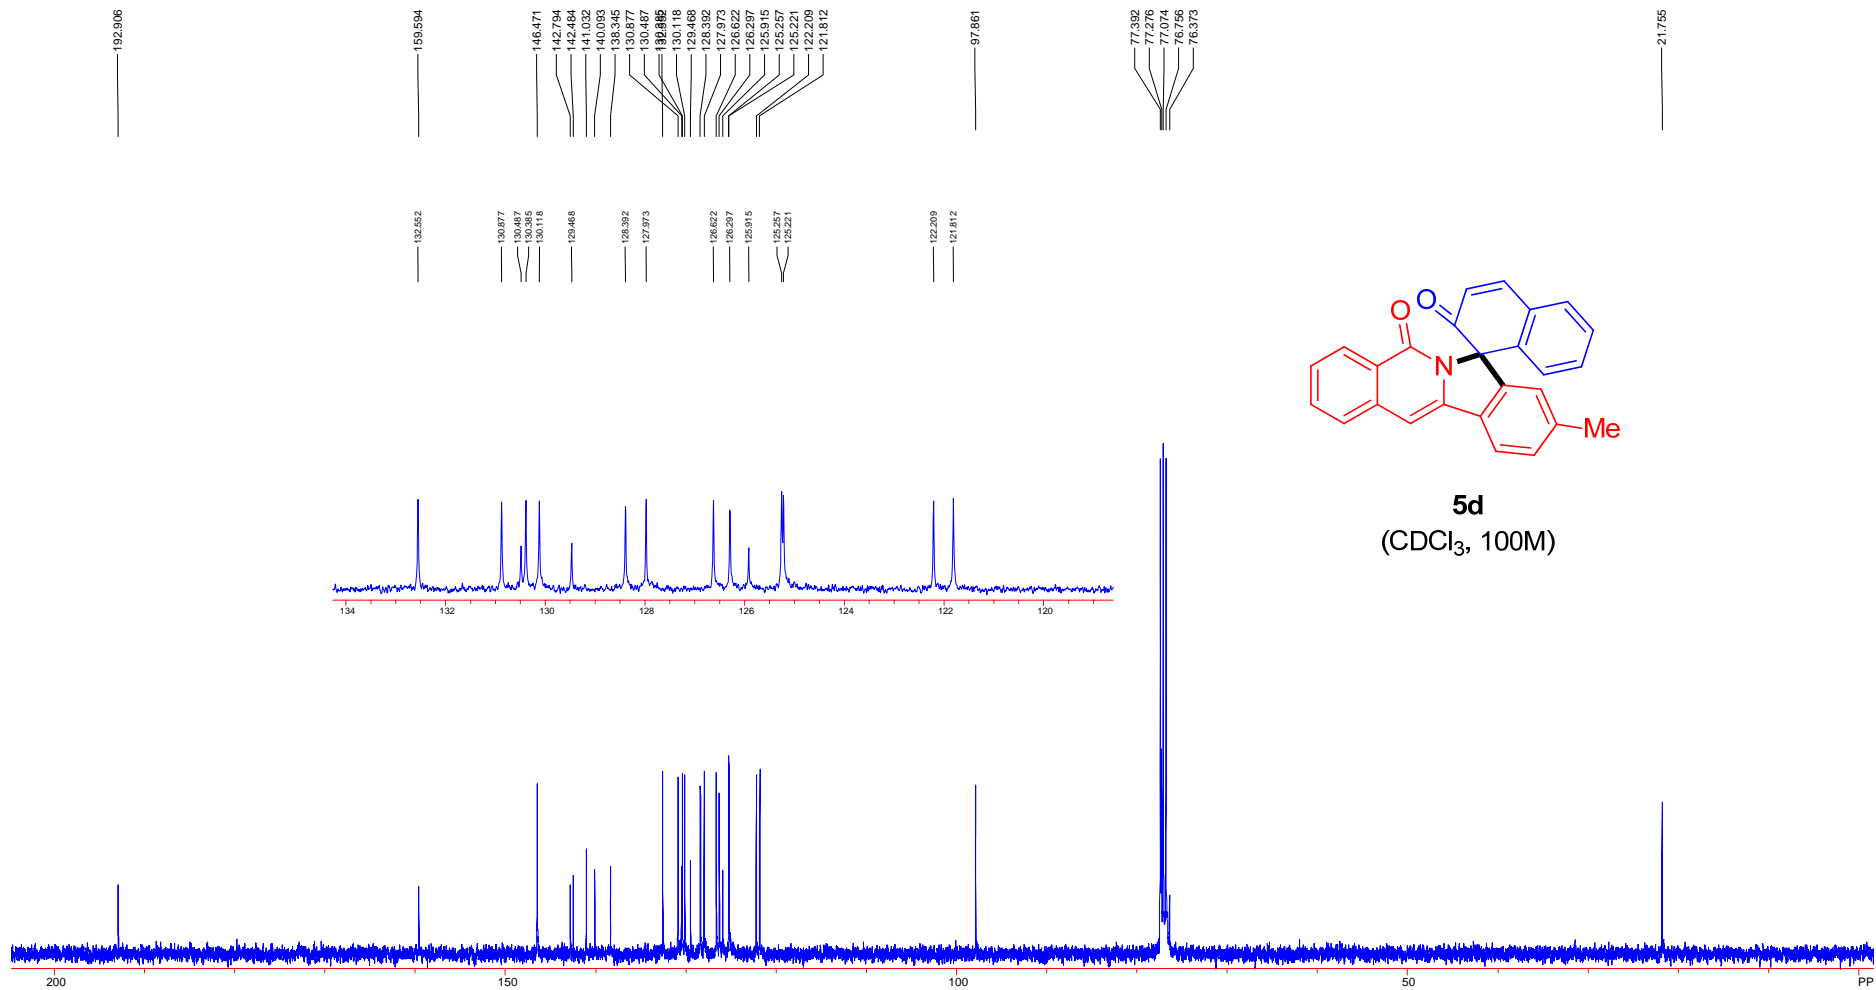

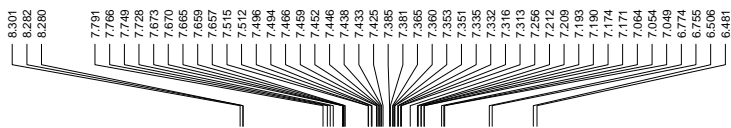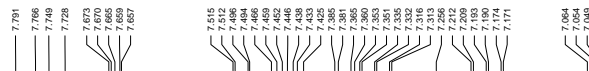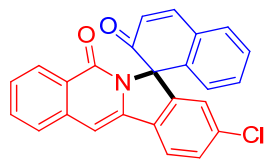

**5e**  
(CDCl<sub>3</sub>, 400M)

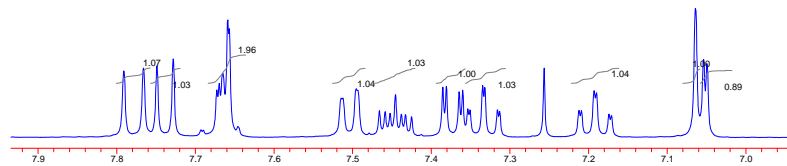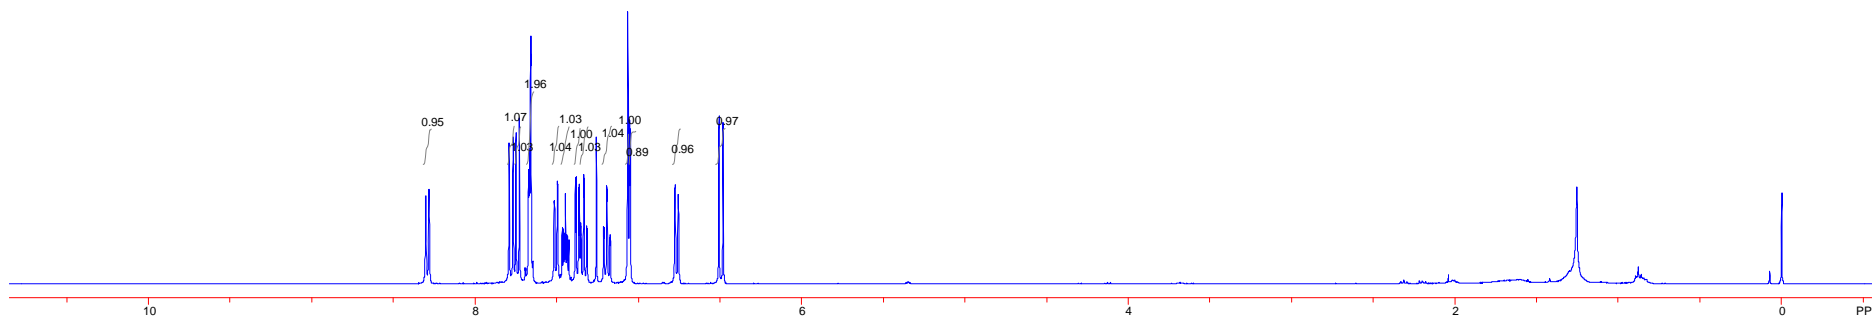

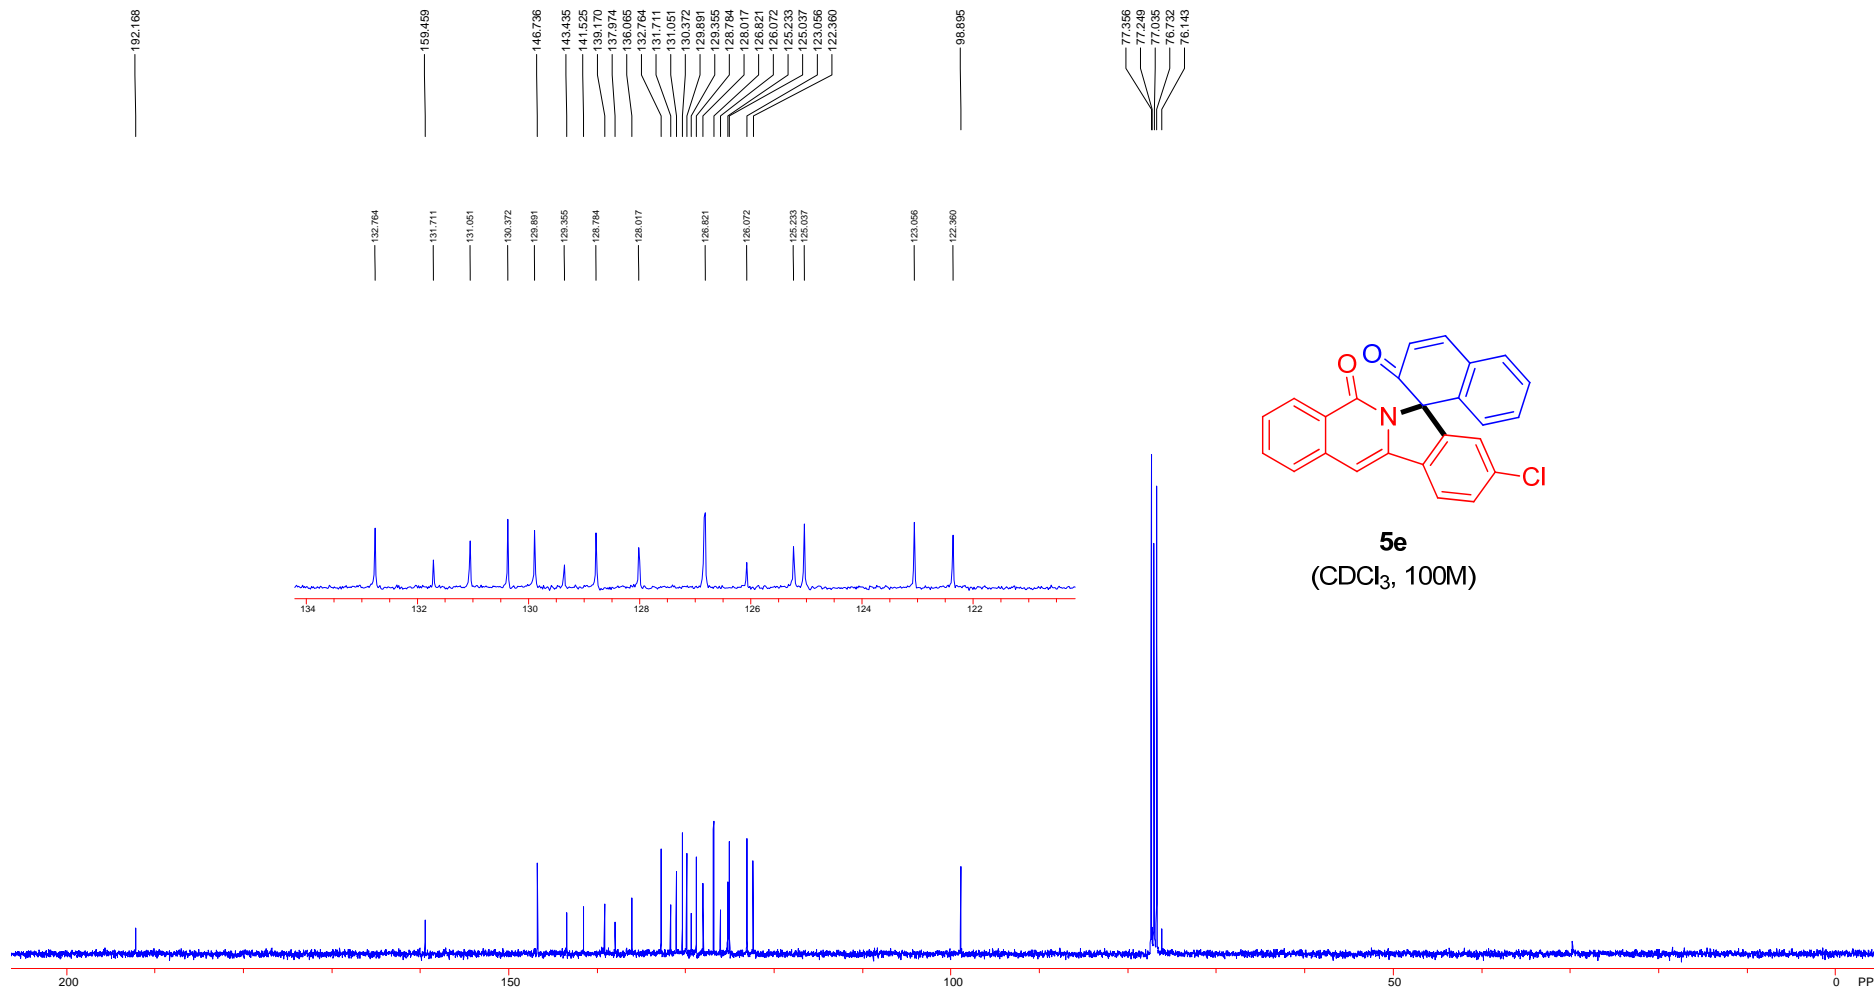

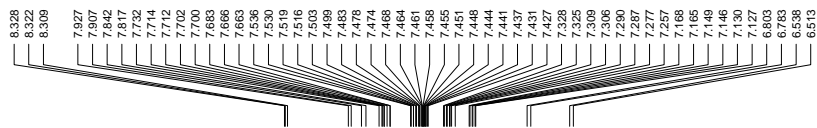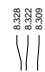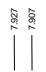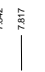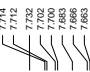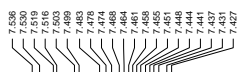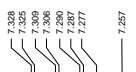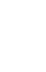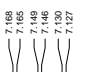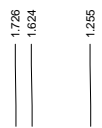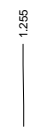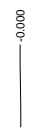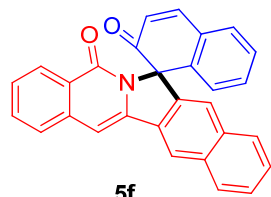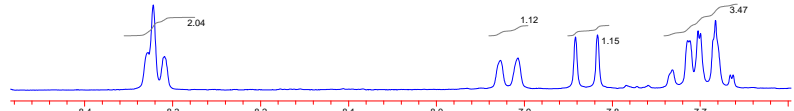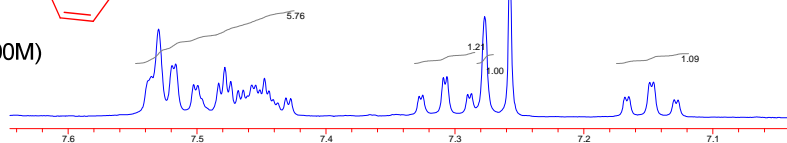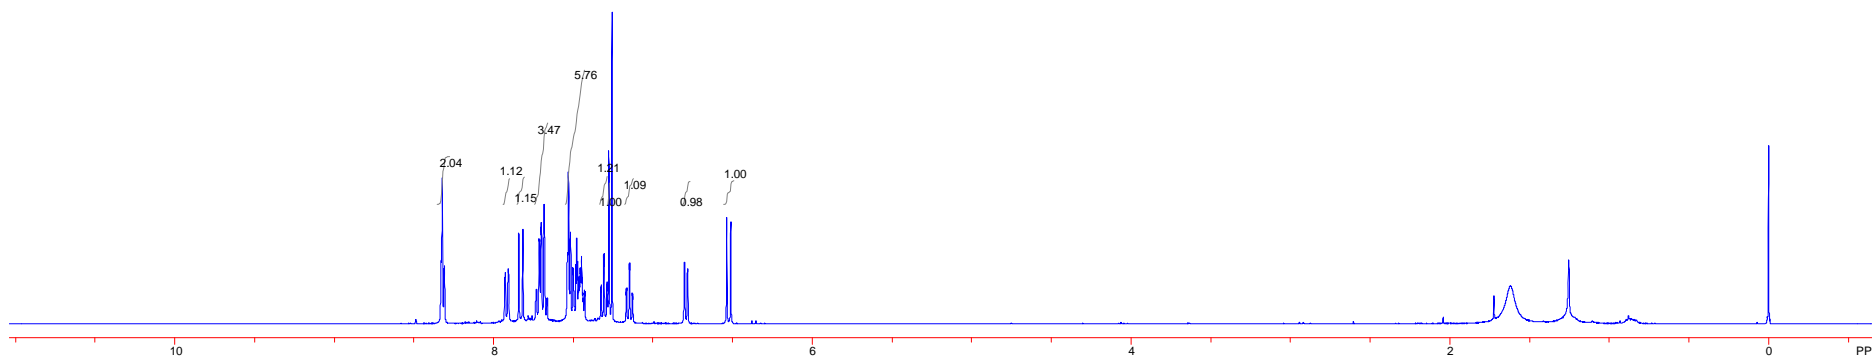

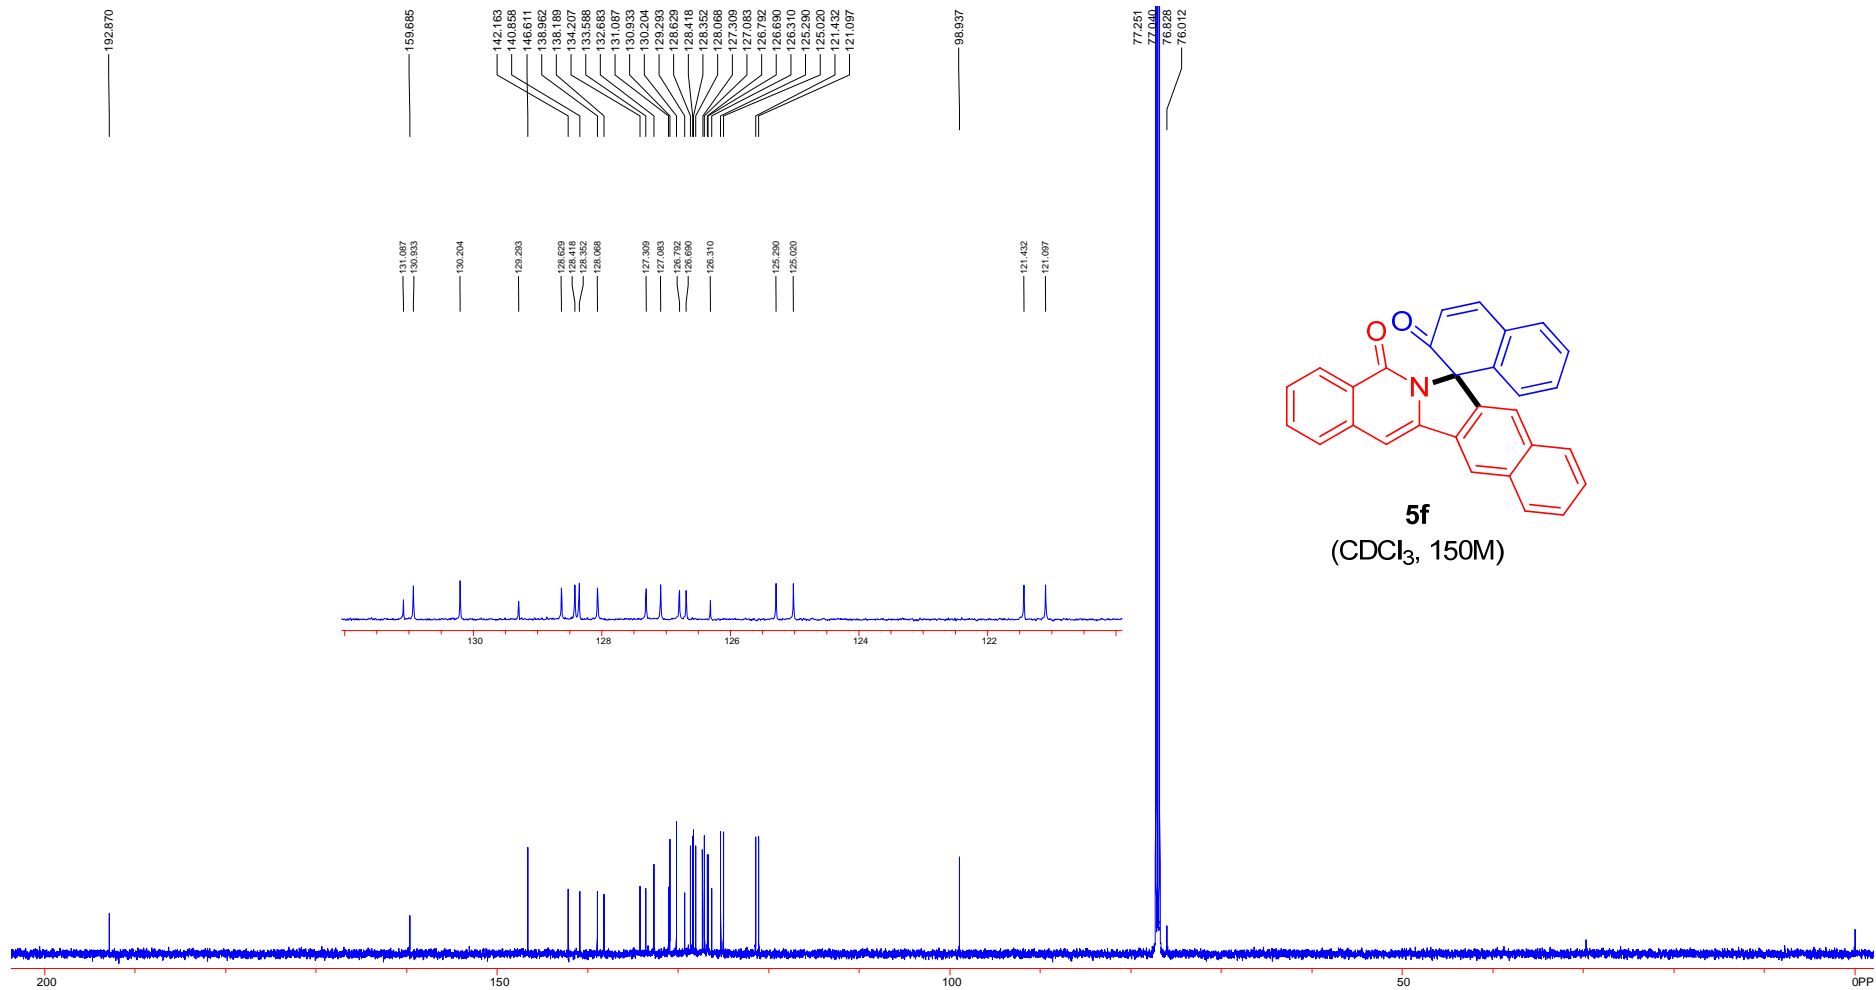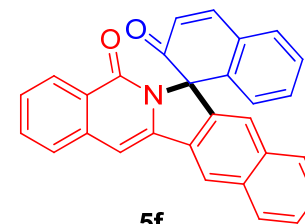

**5f**  
(CDCl<sub>3</sub>, 150M)

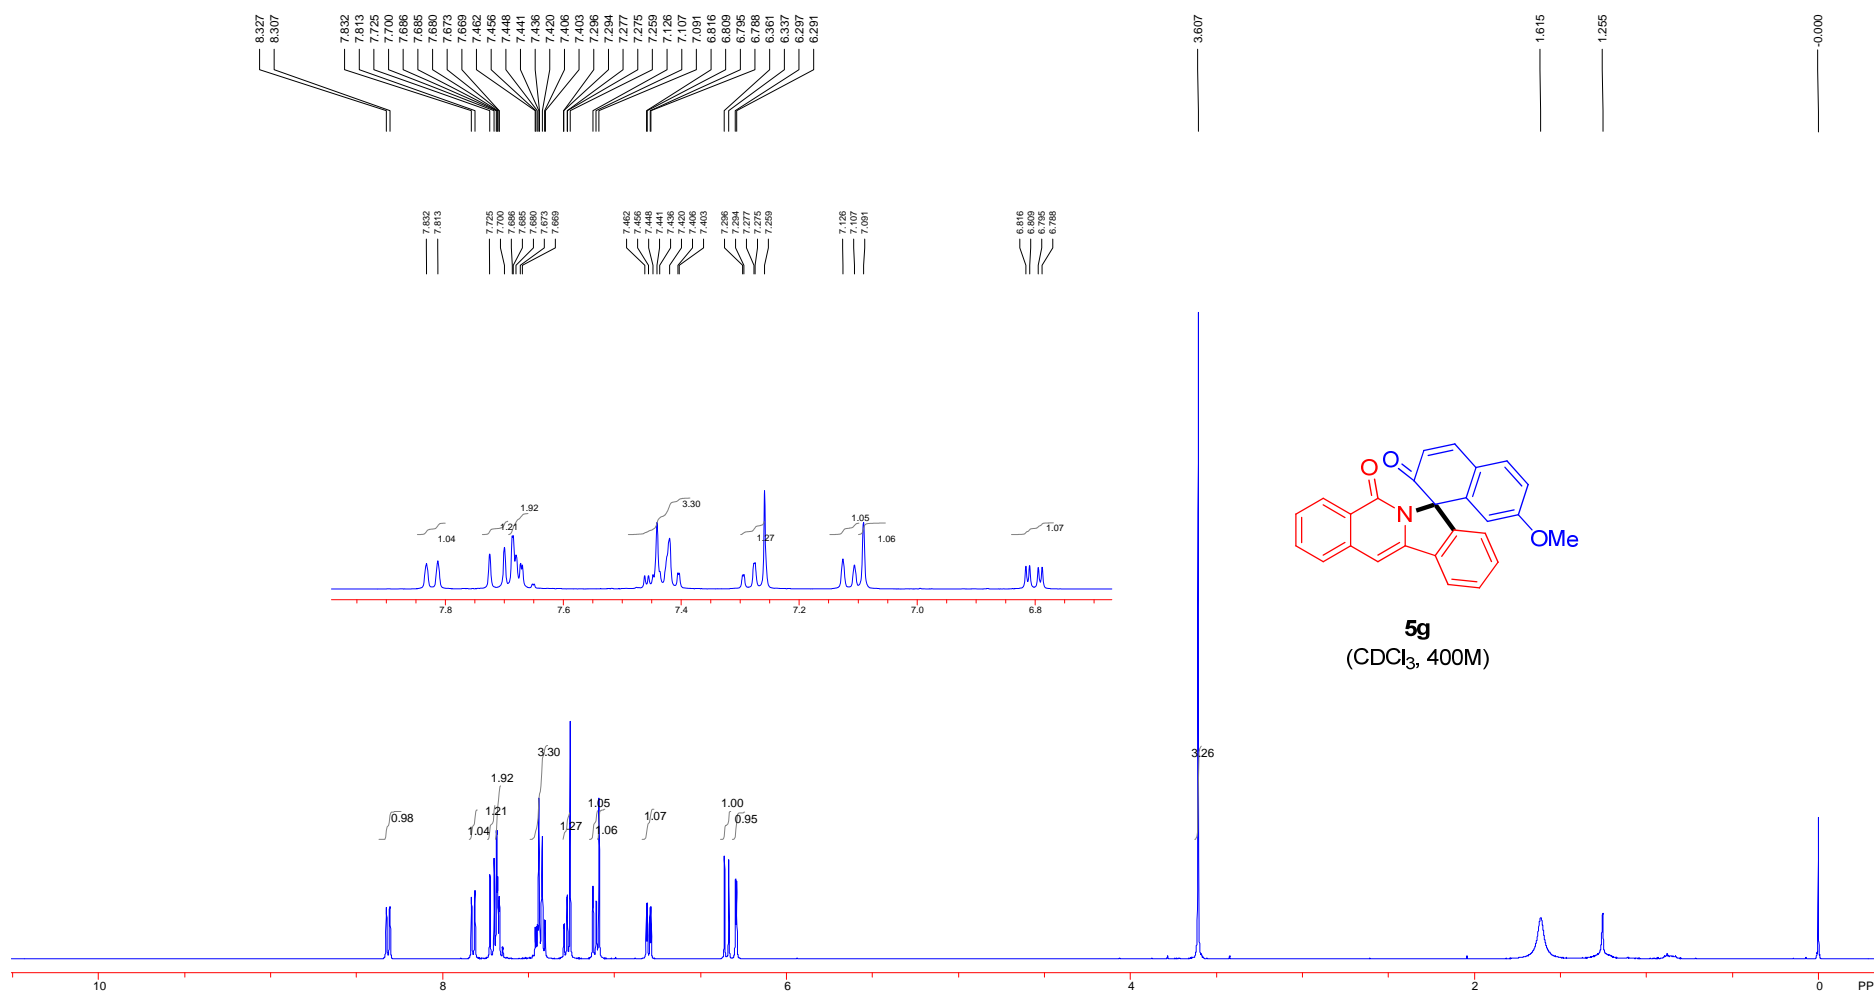

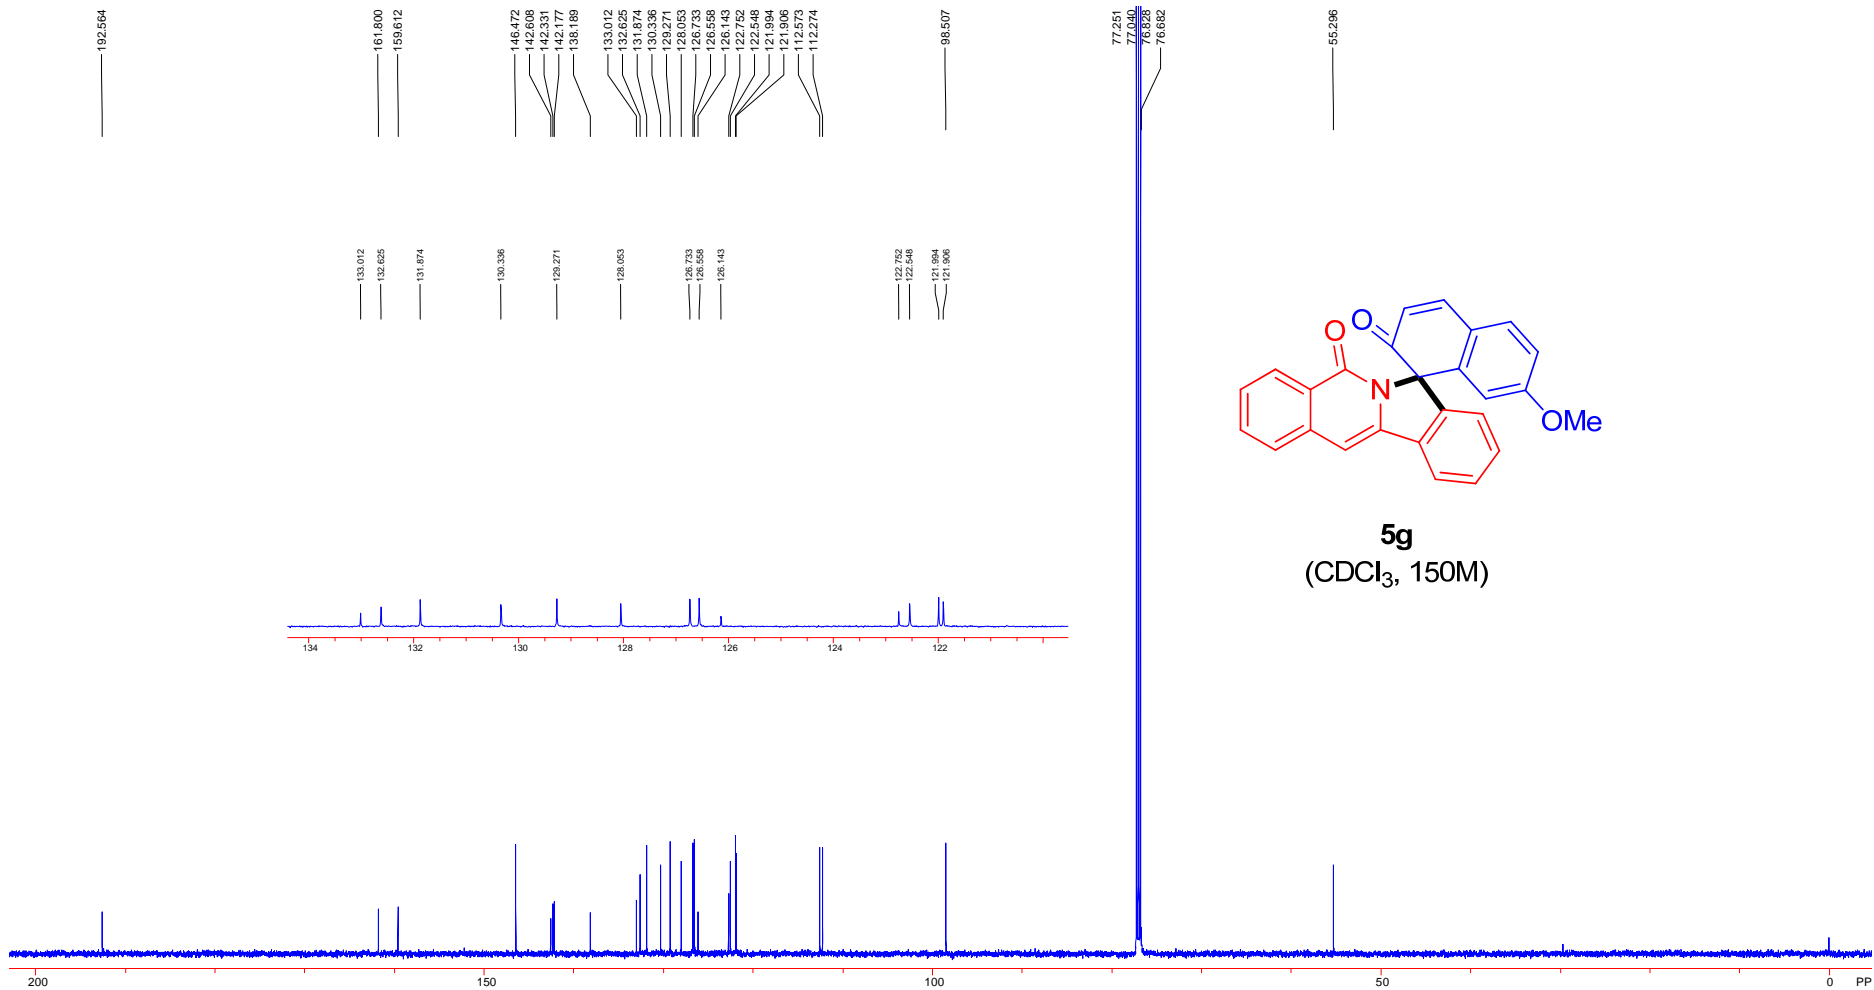



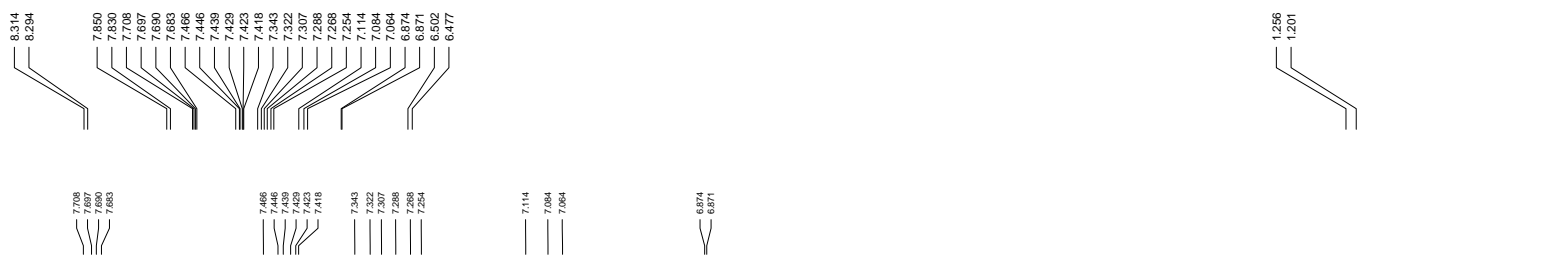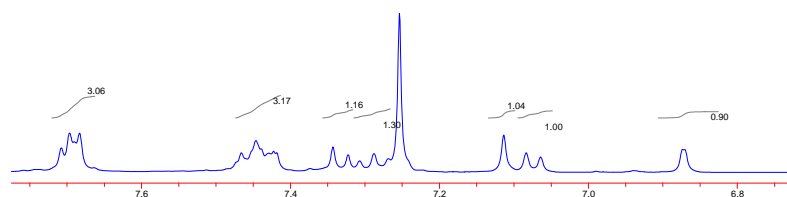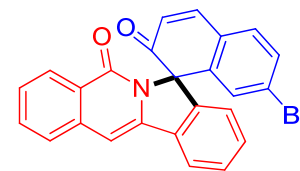

**5h**  
(CDCl<sub>3</sub>, 400M)

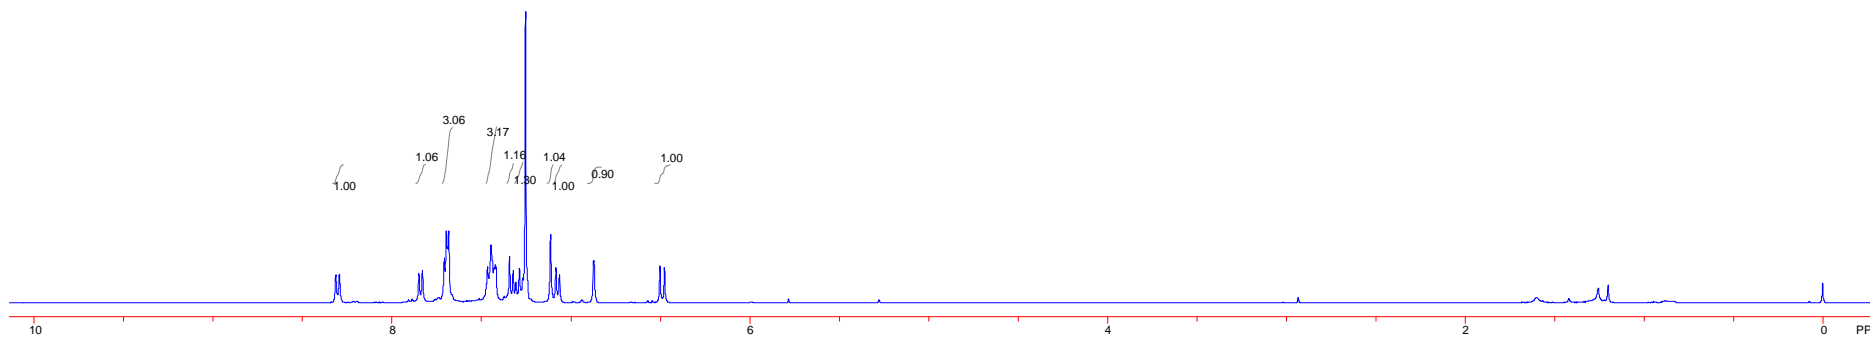

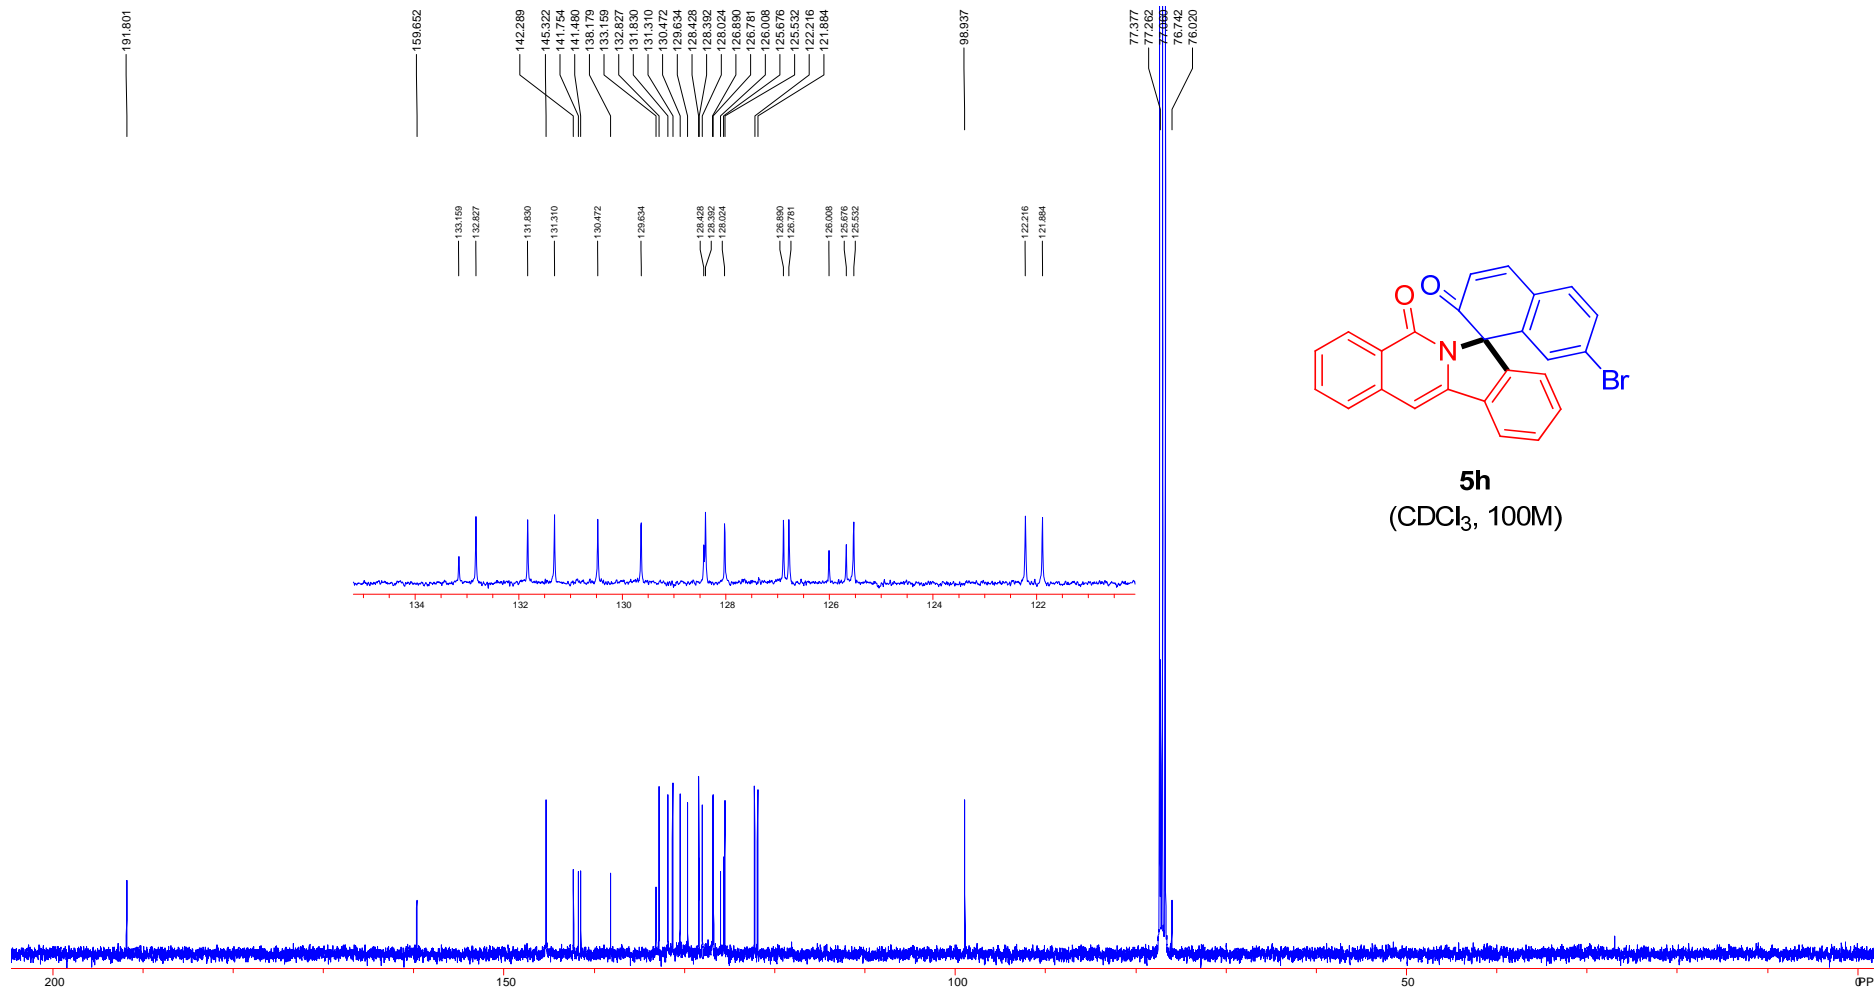

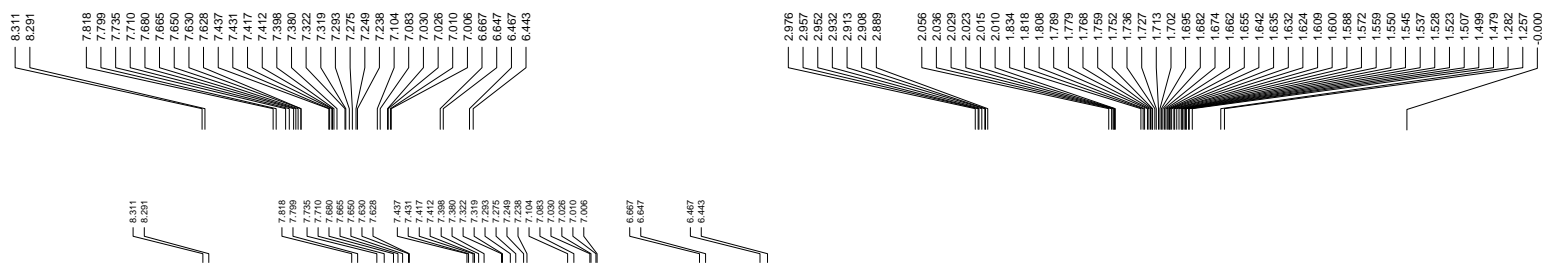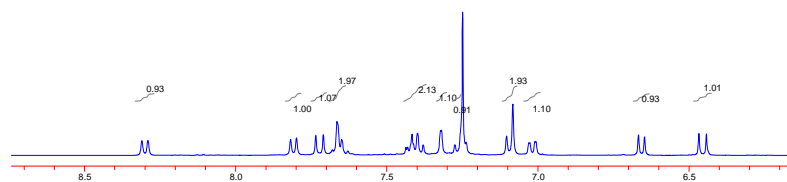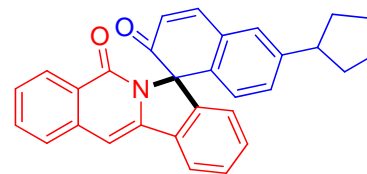

**5i**  
(CDCl<sub>3</sub>, 400M)

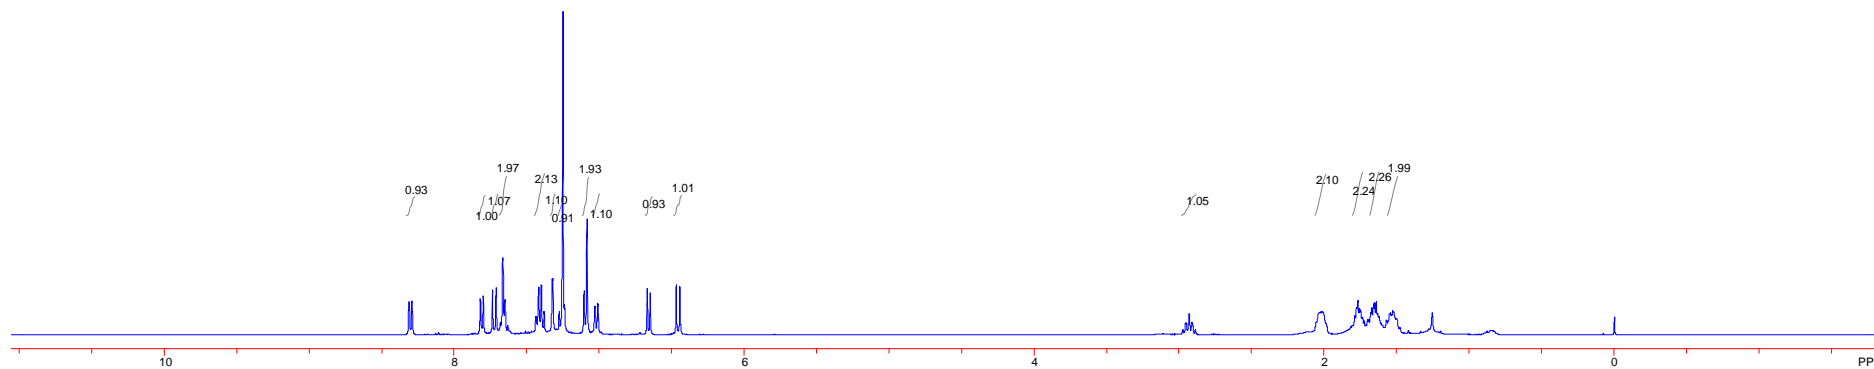

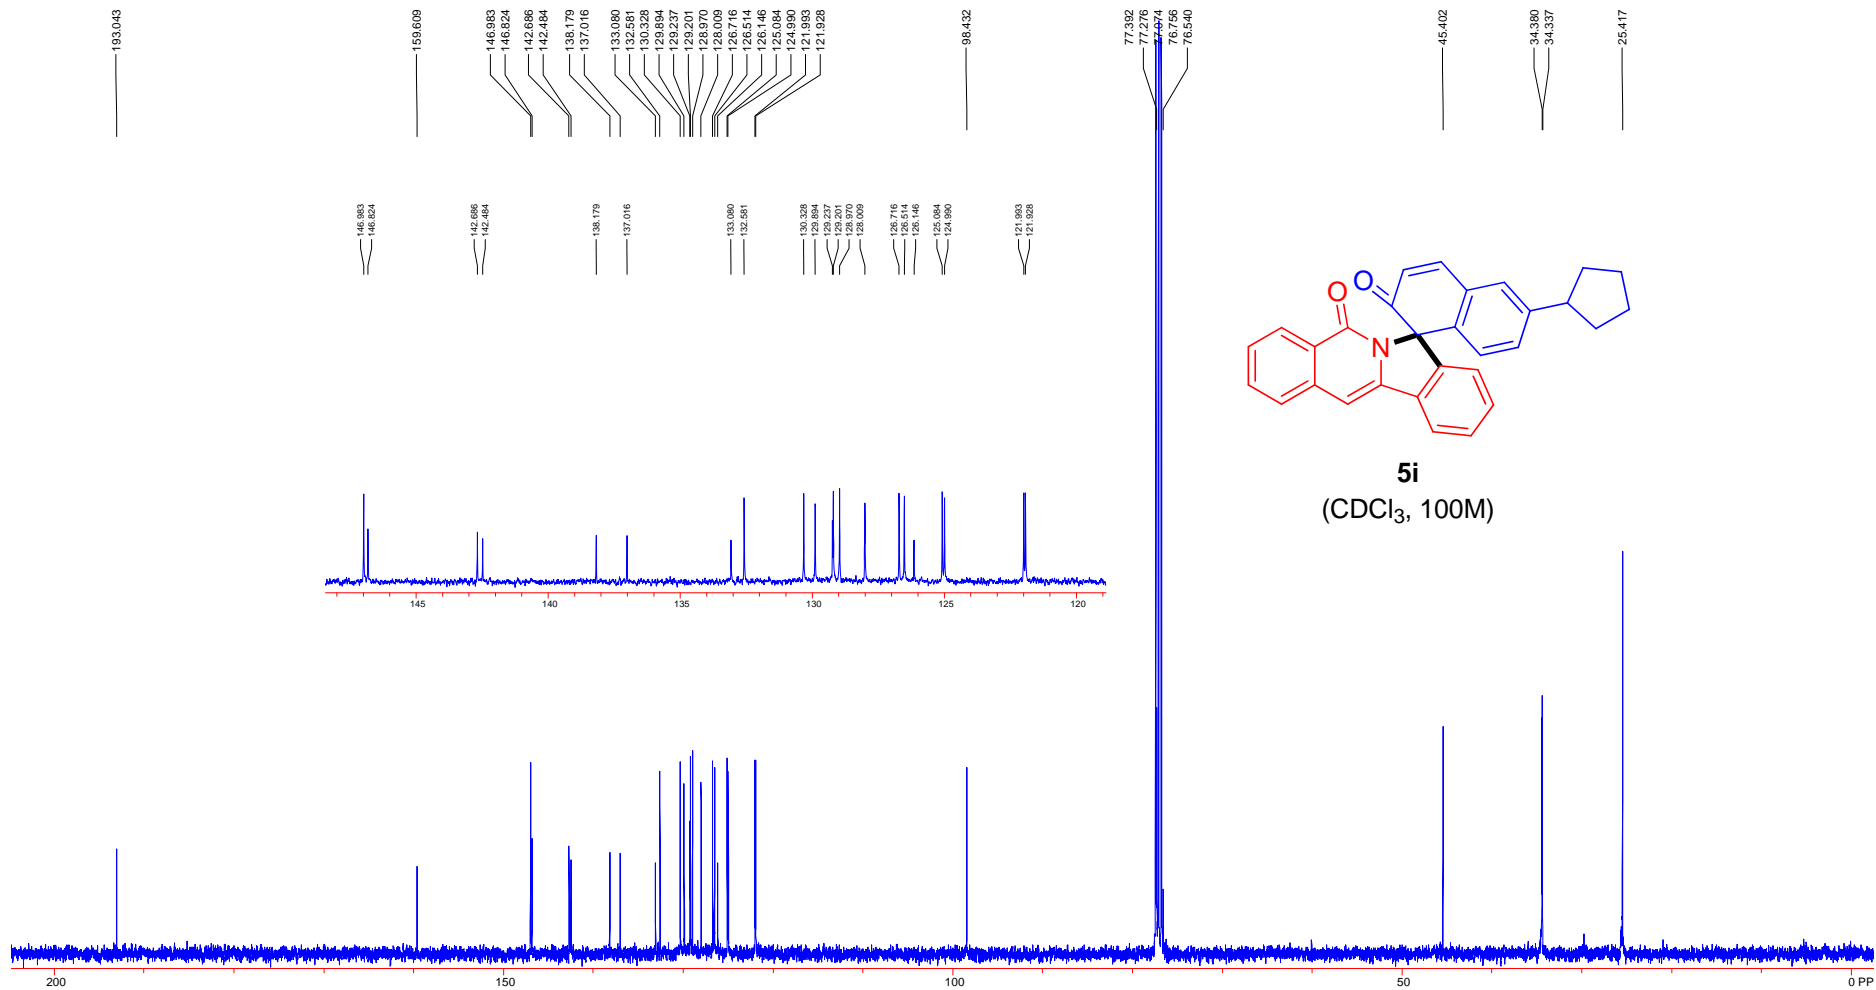

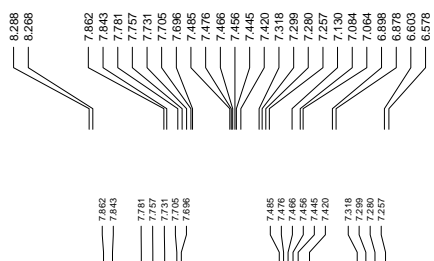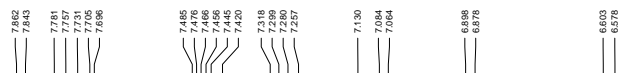

1.591

-0.000

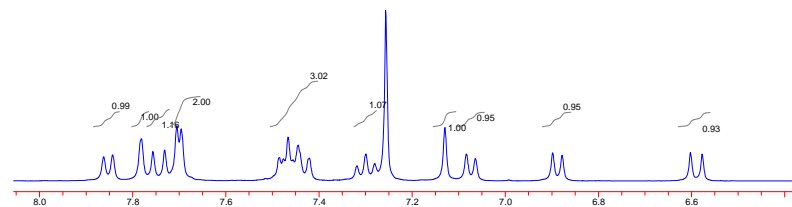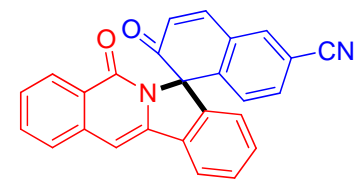

**5j**  
(CDCl<sub>3</sub>, 400M)

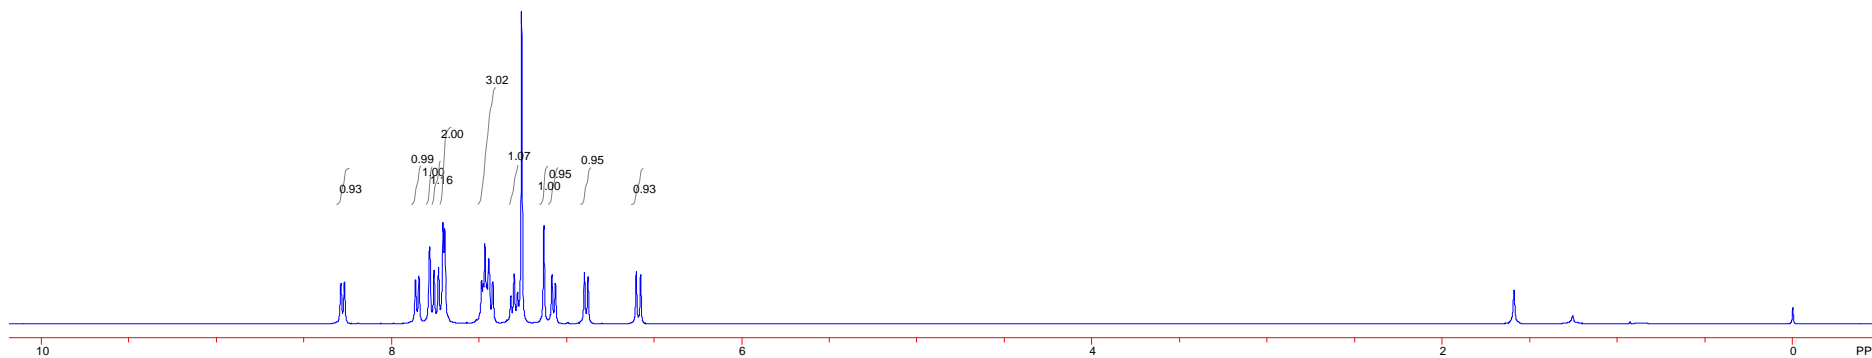

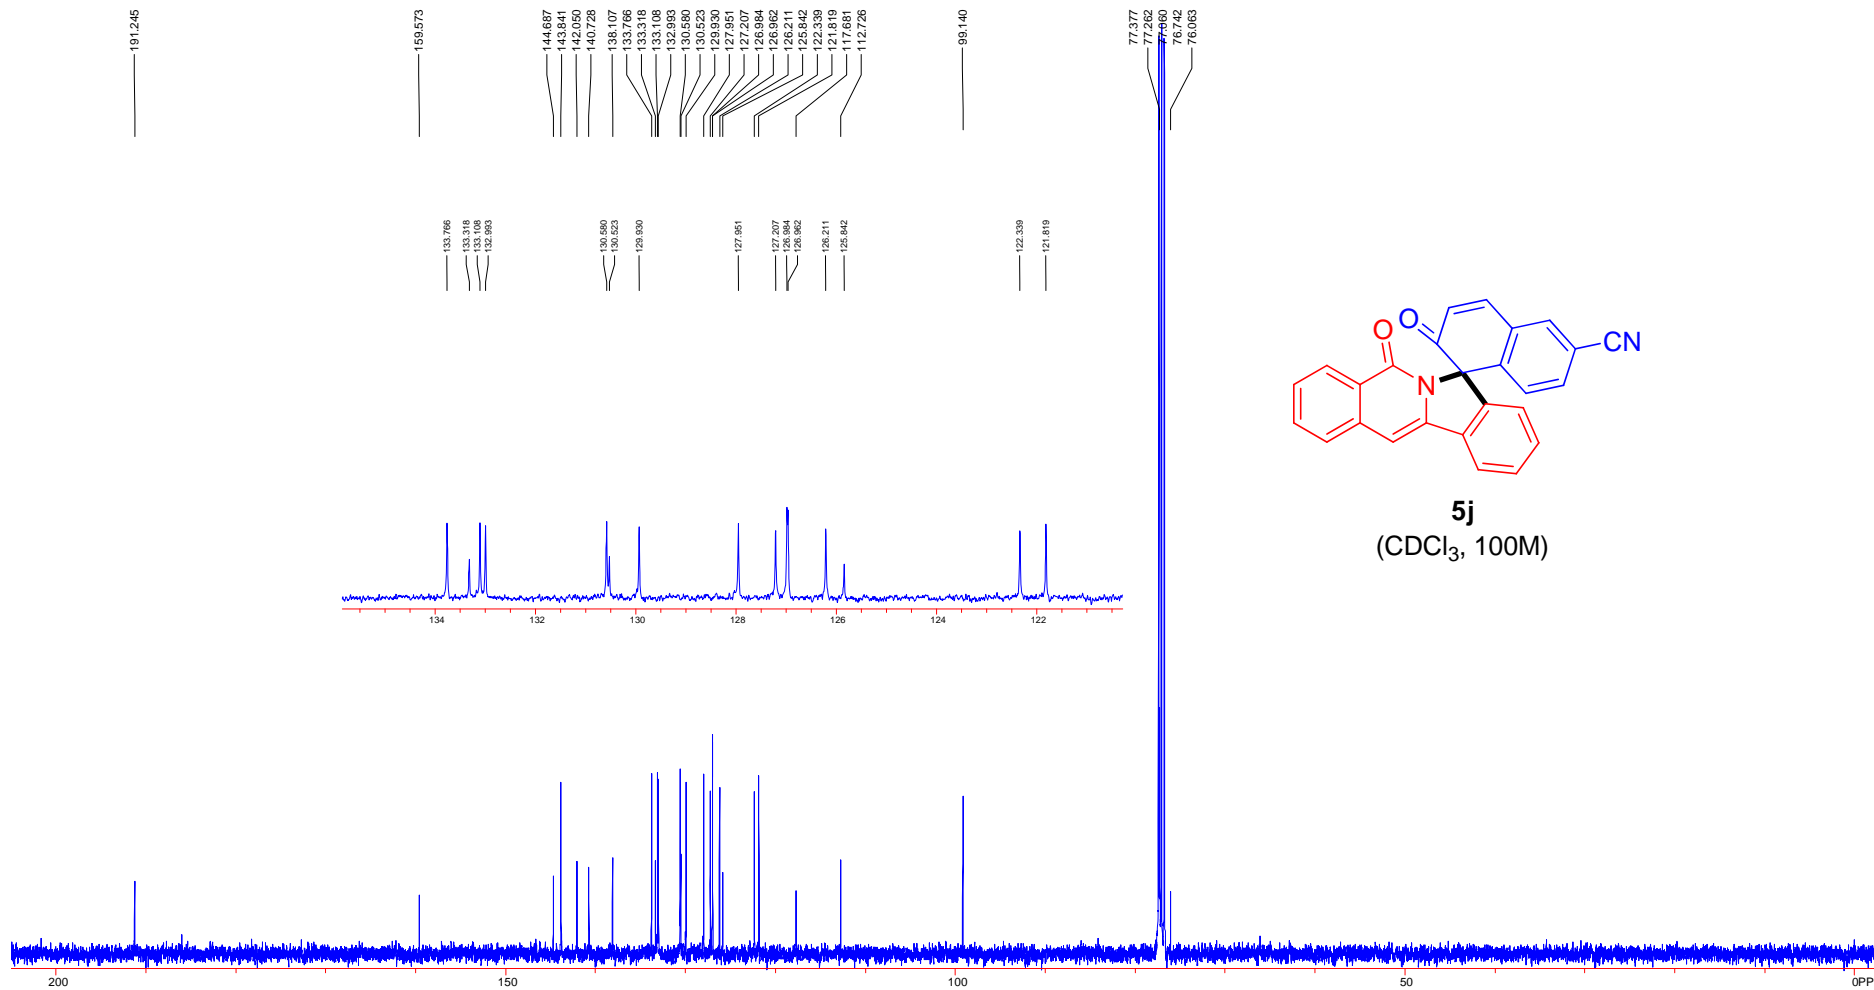

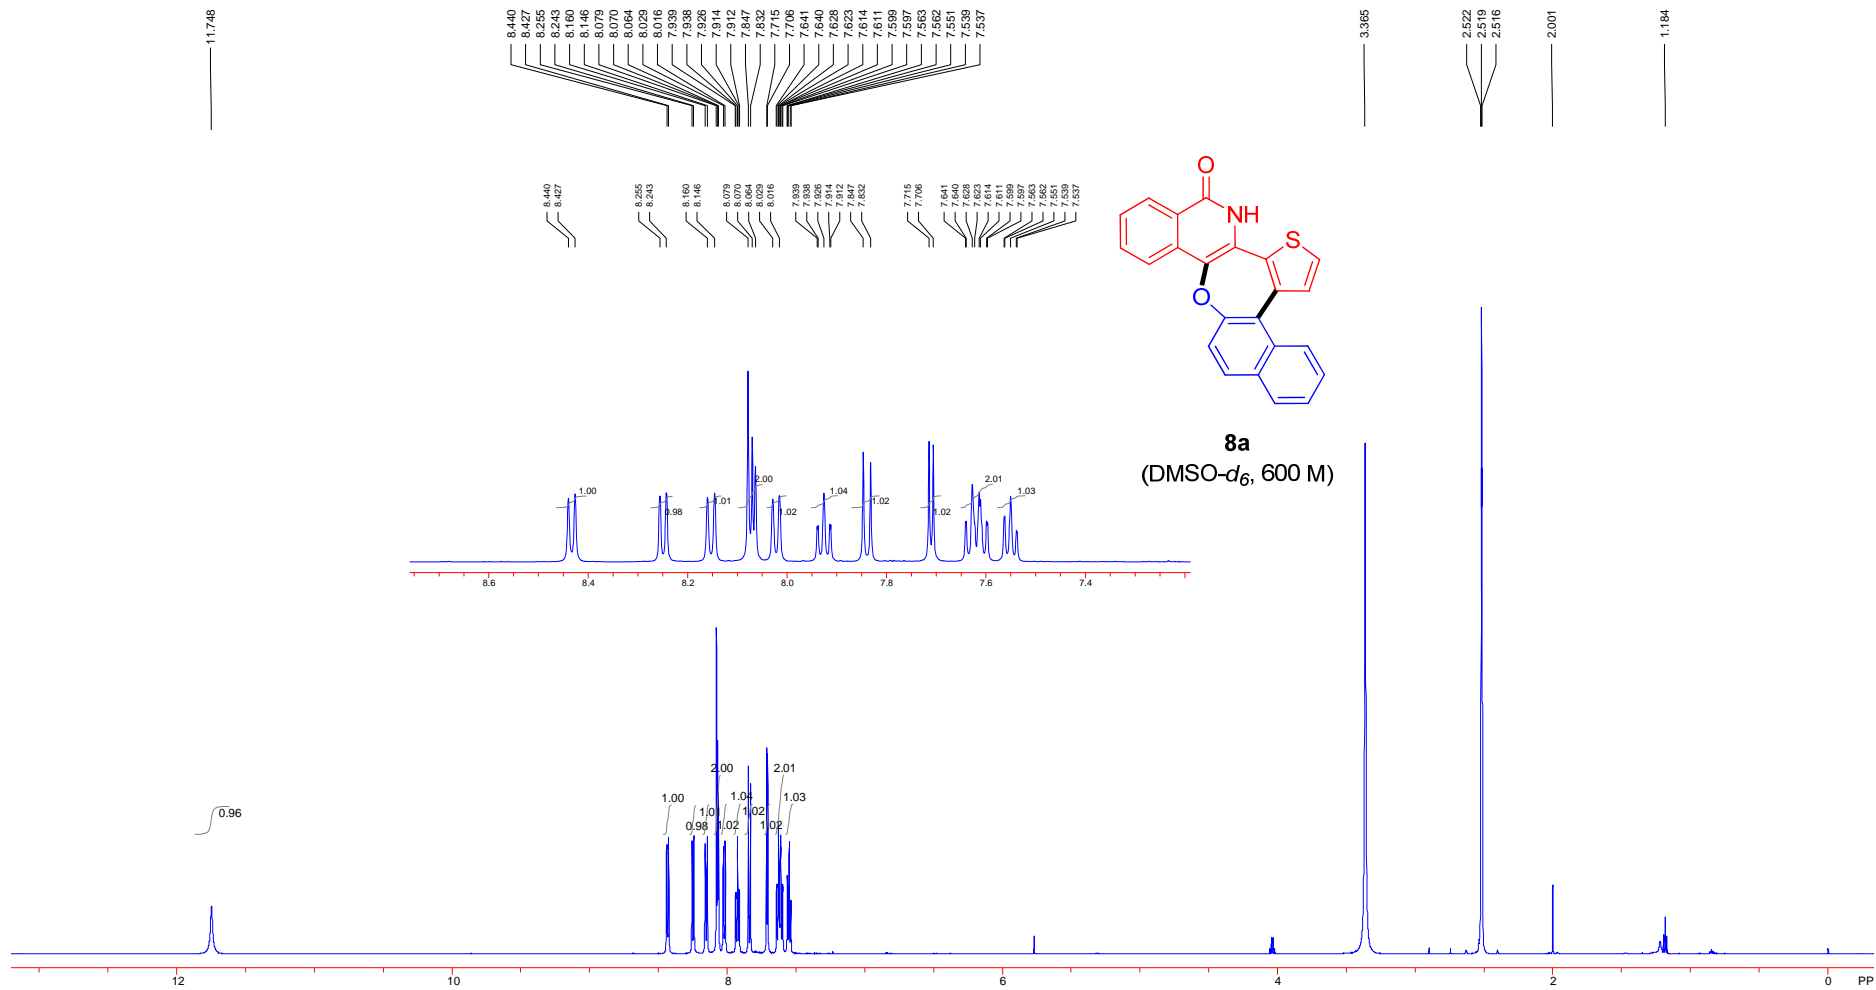

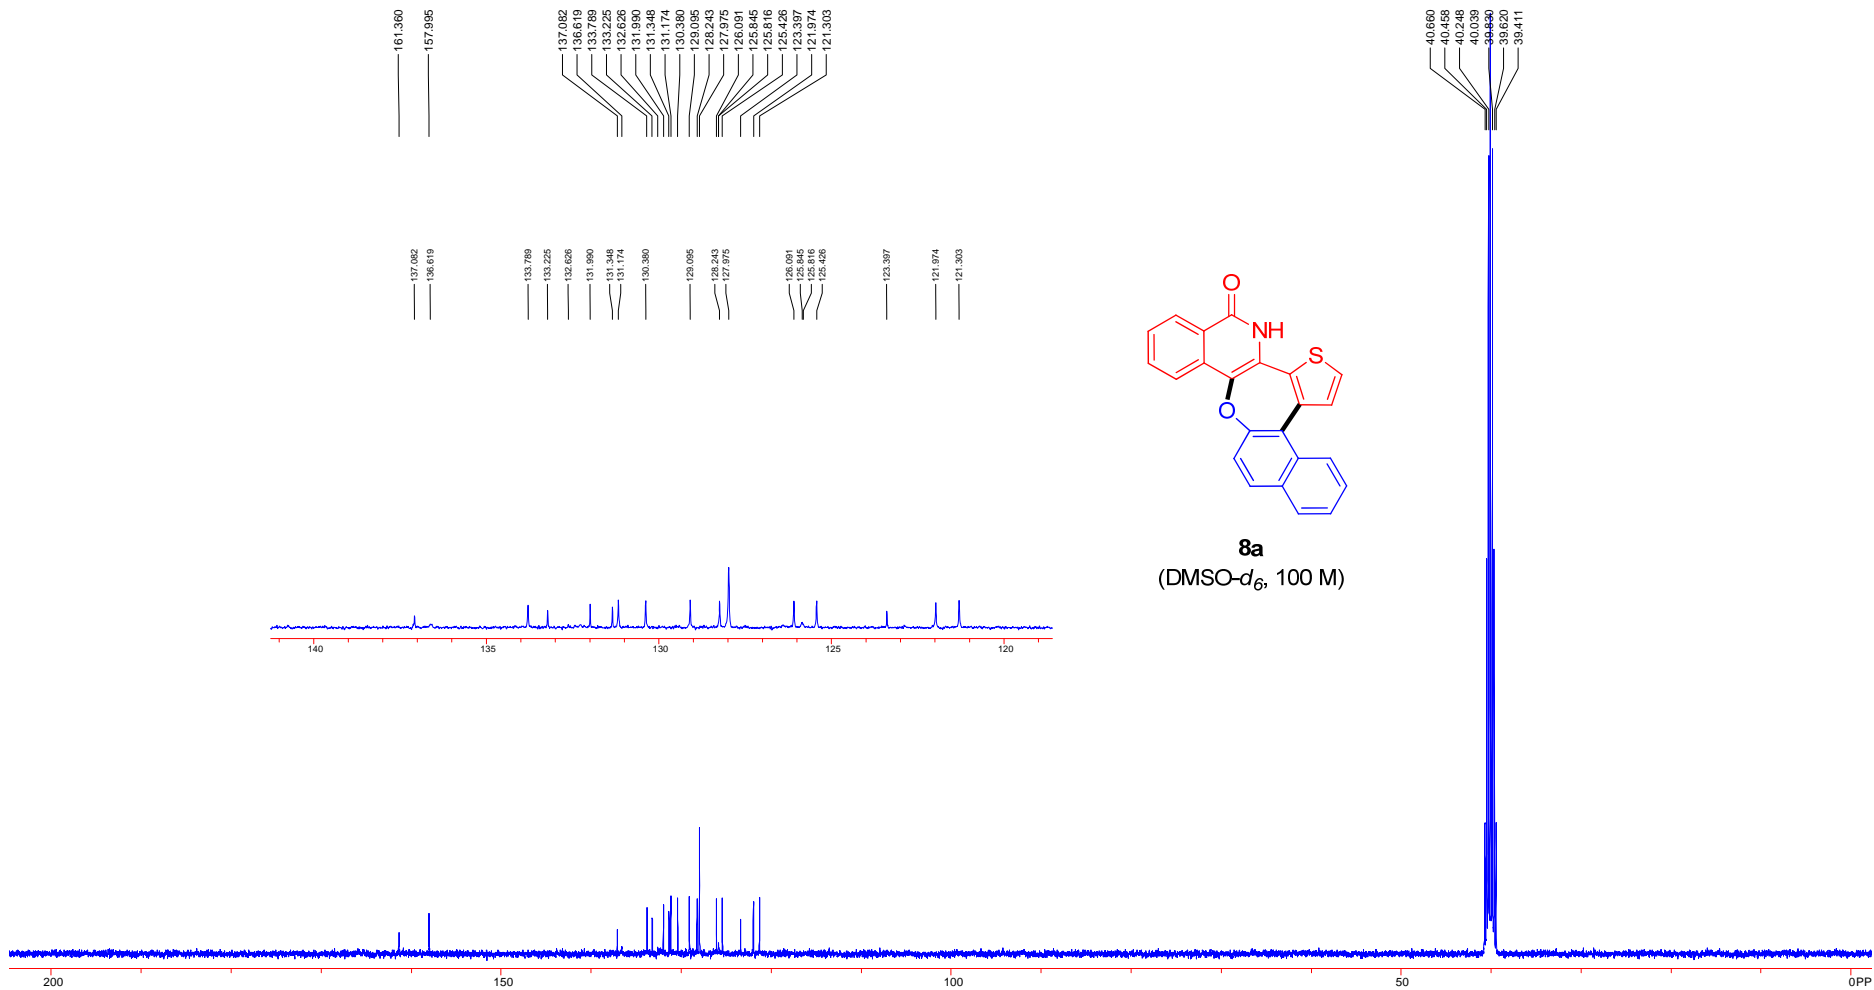



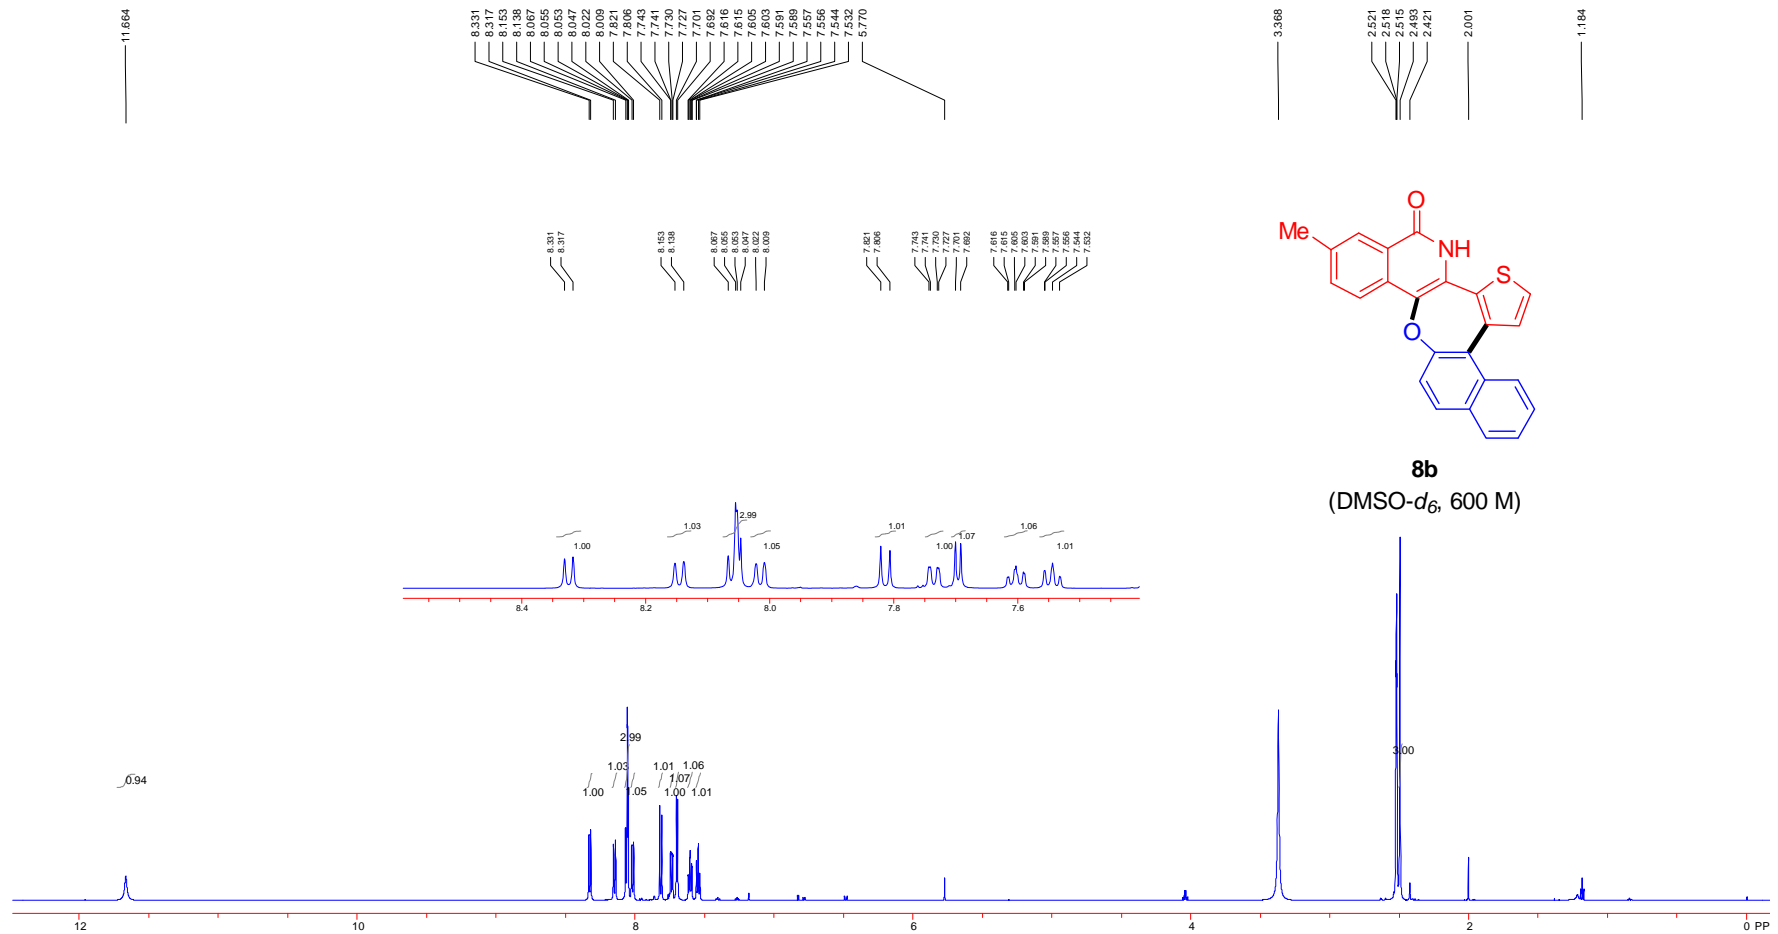

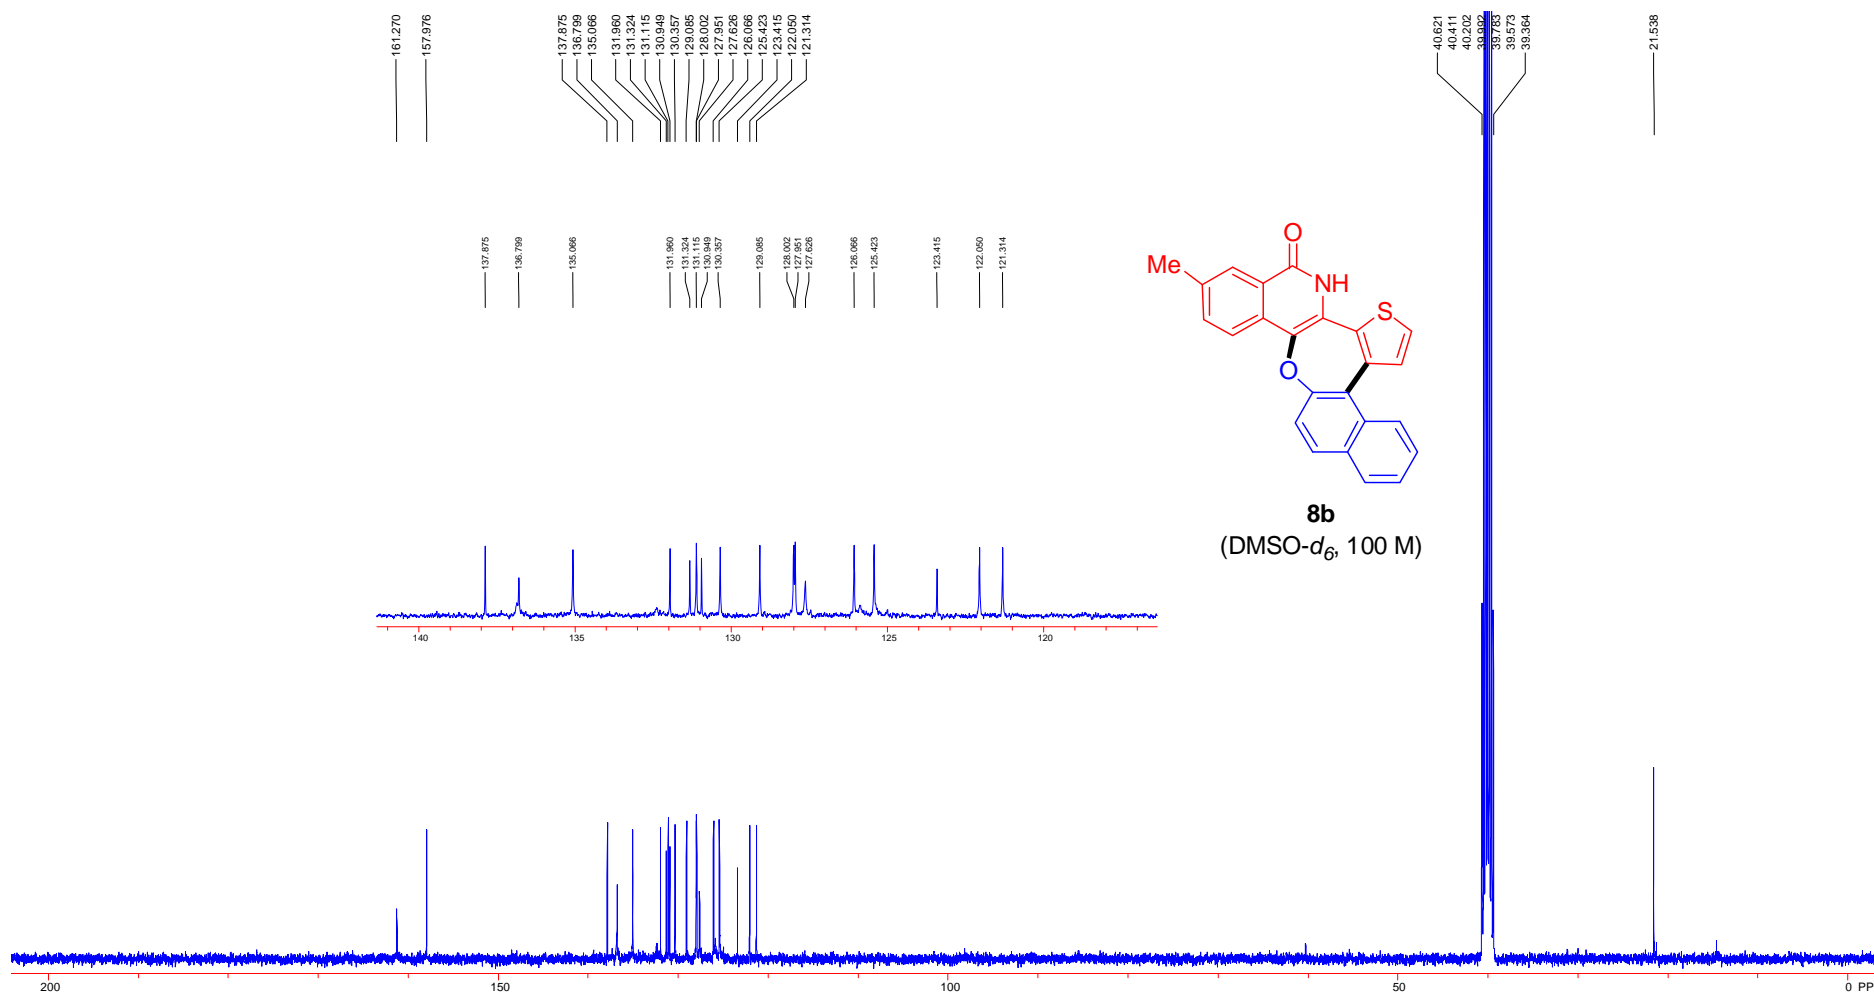

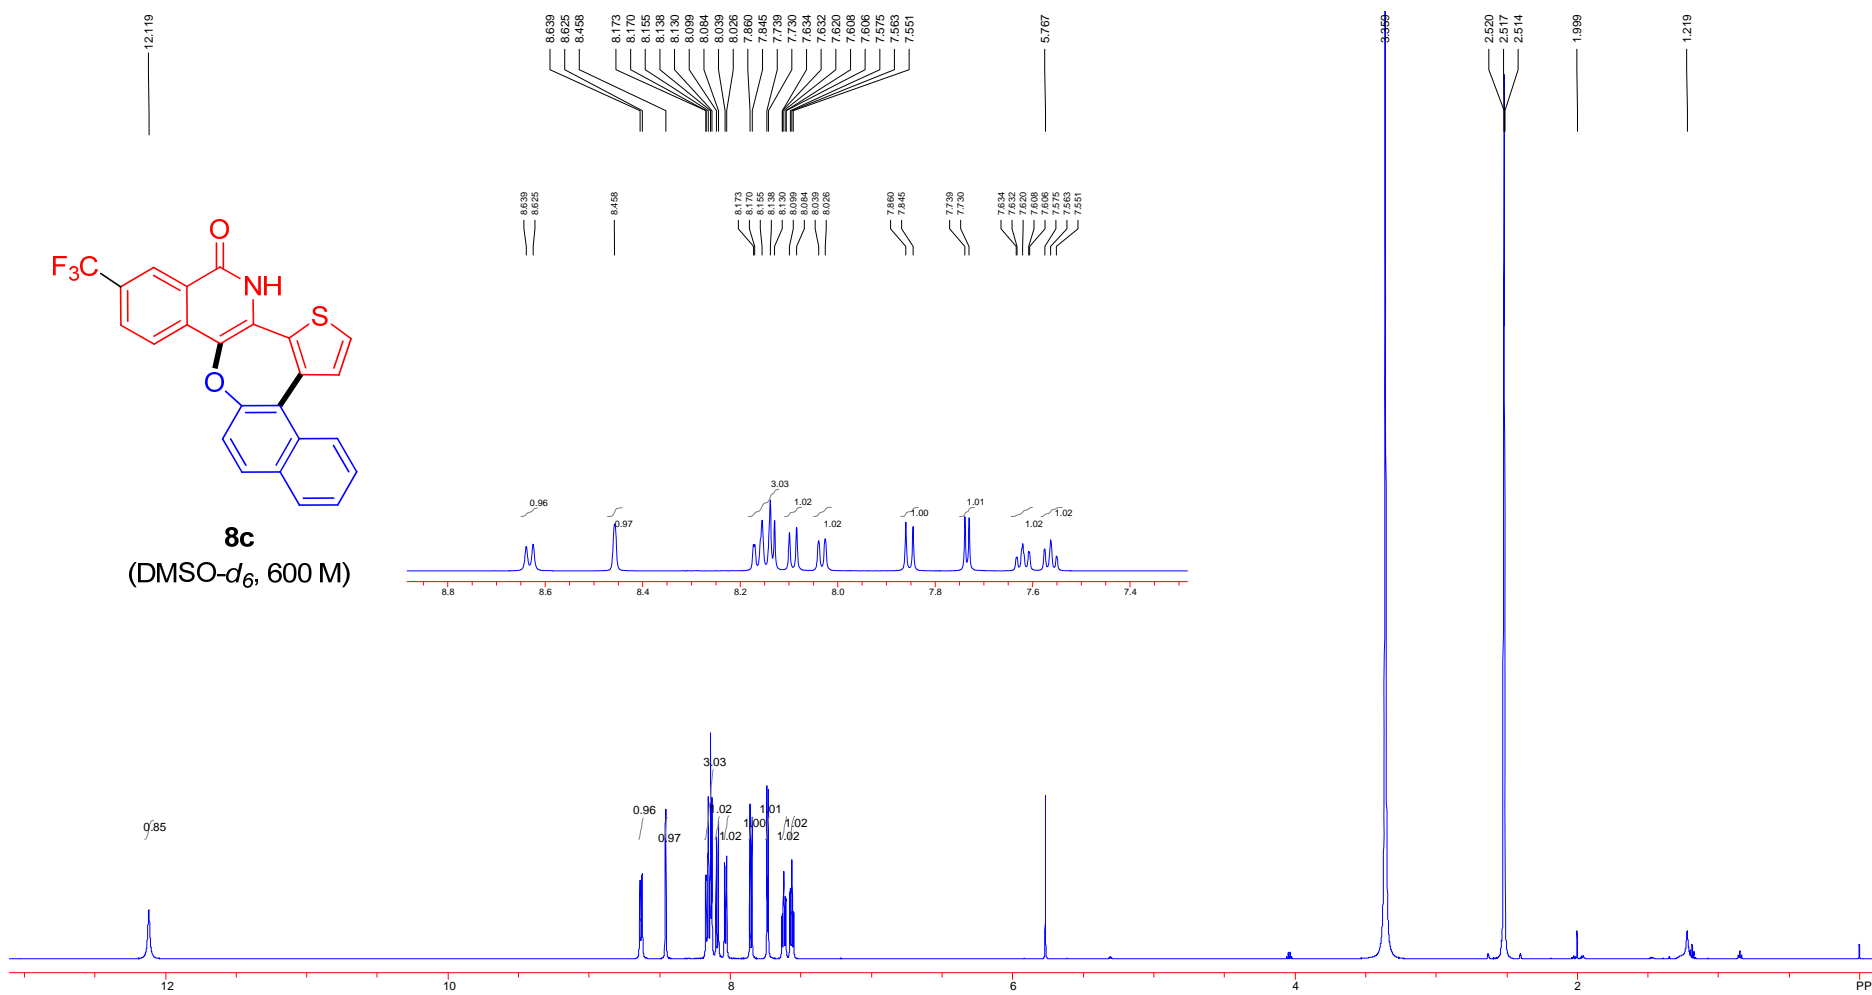

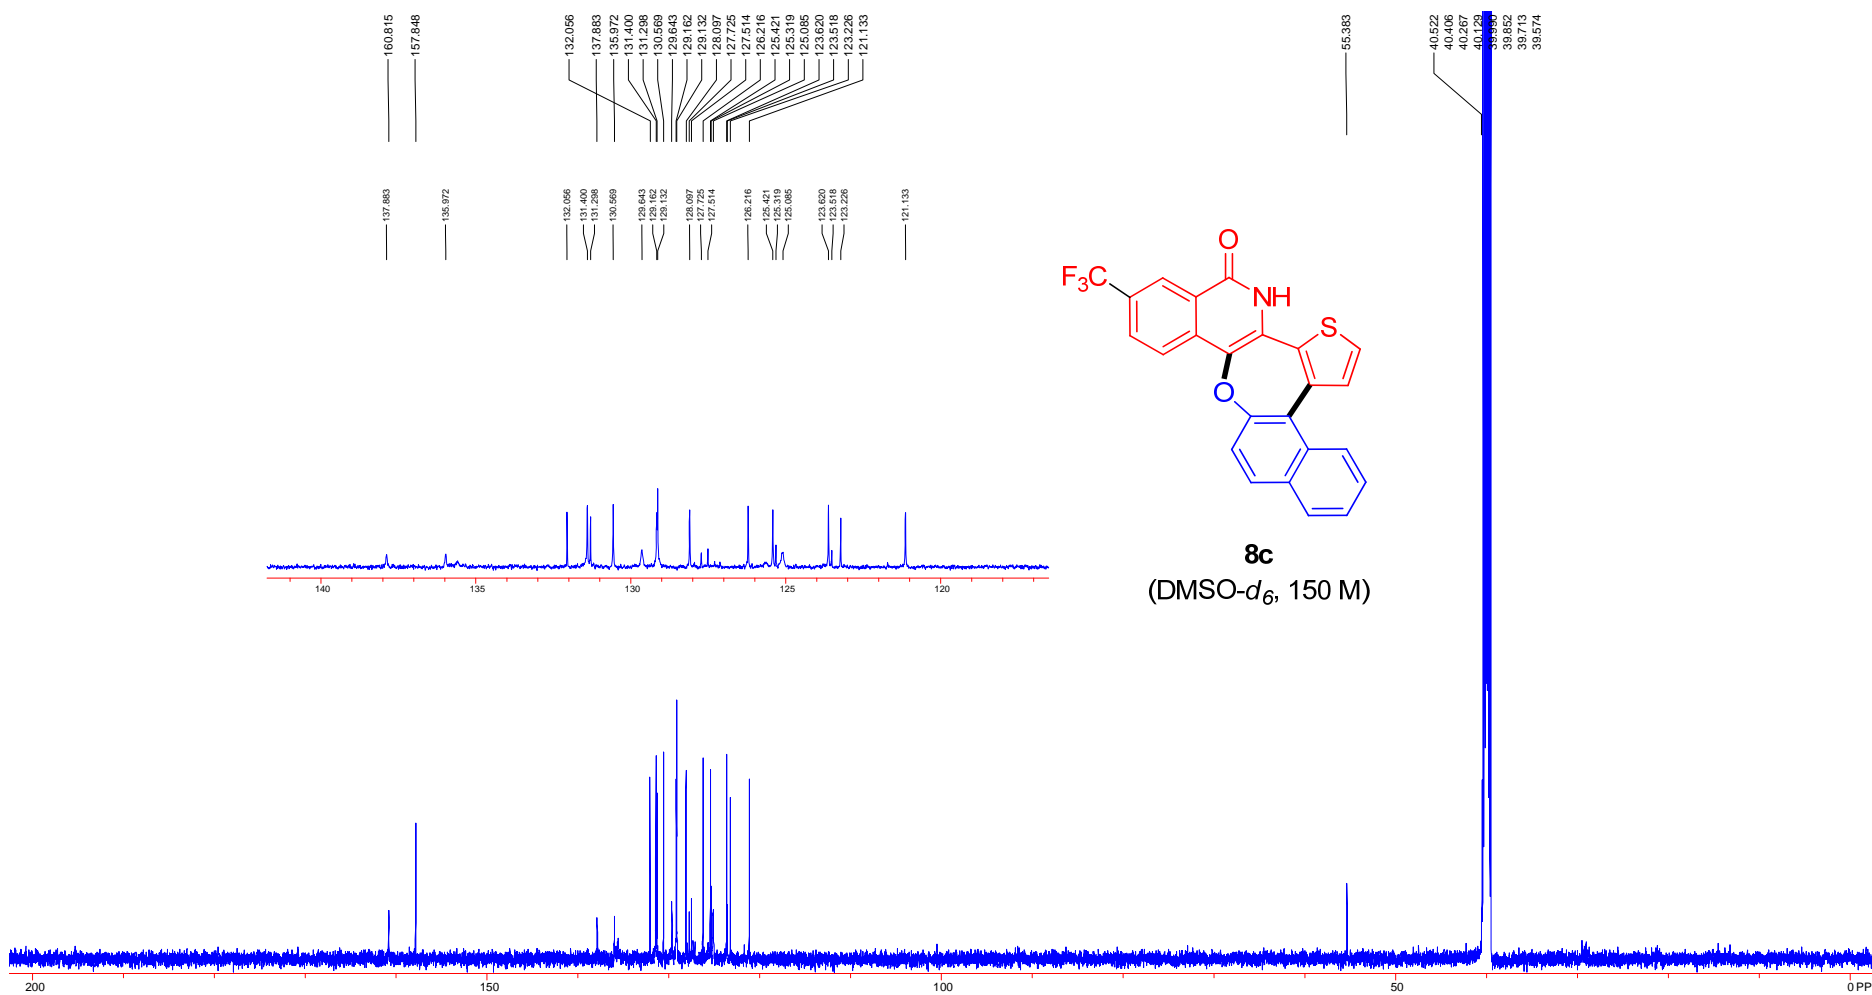

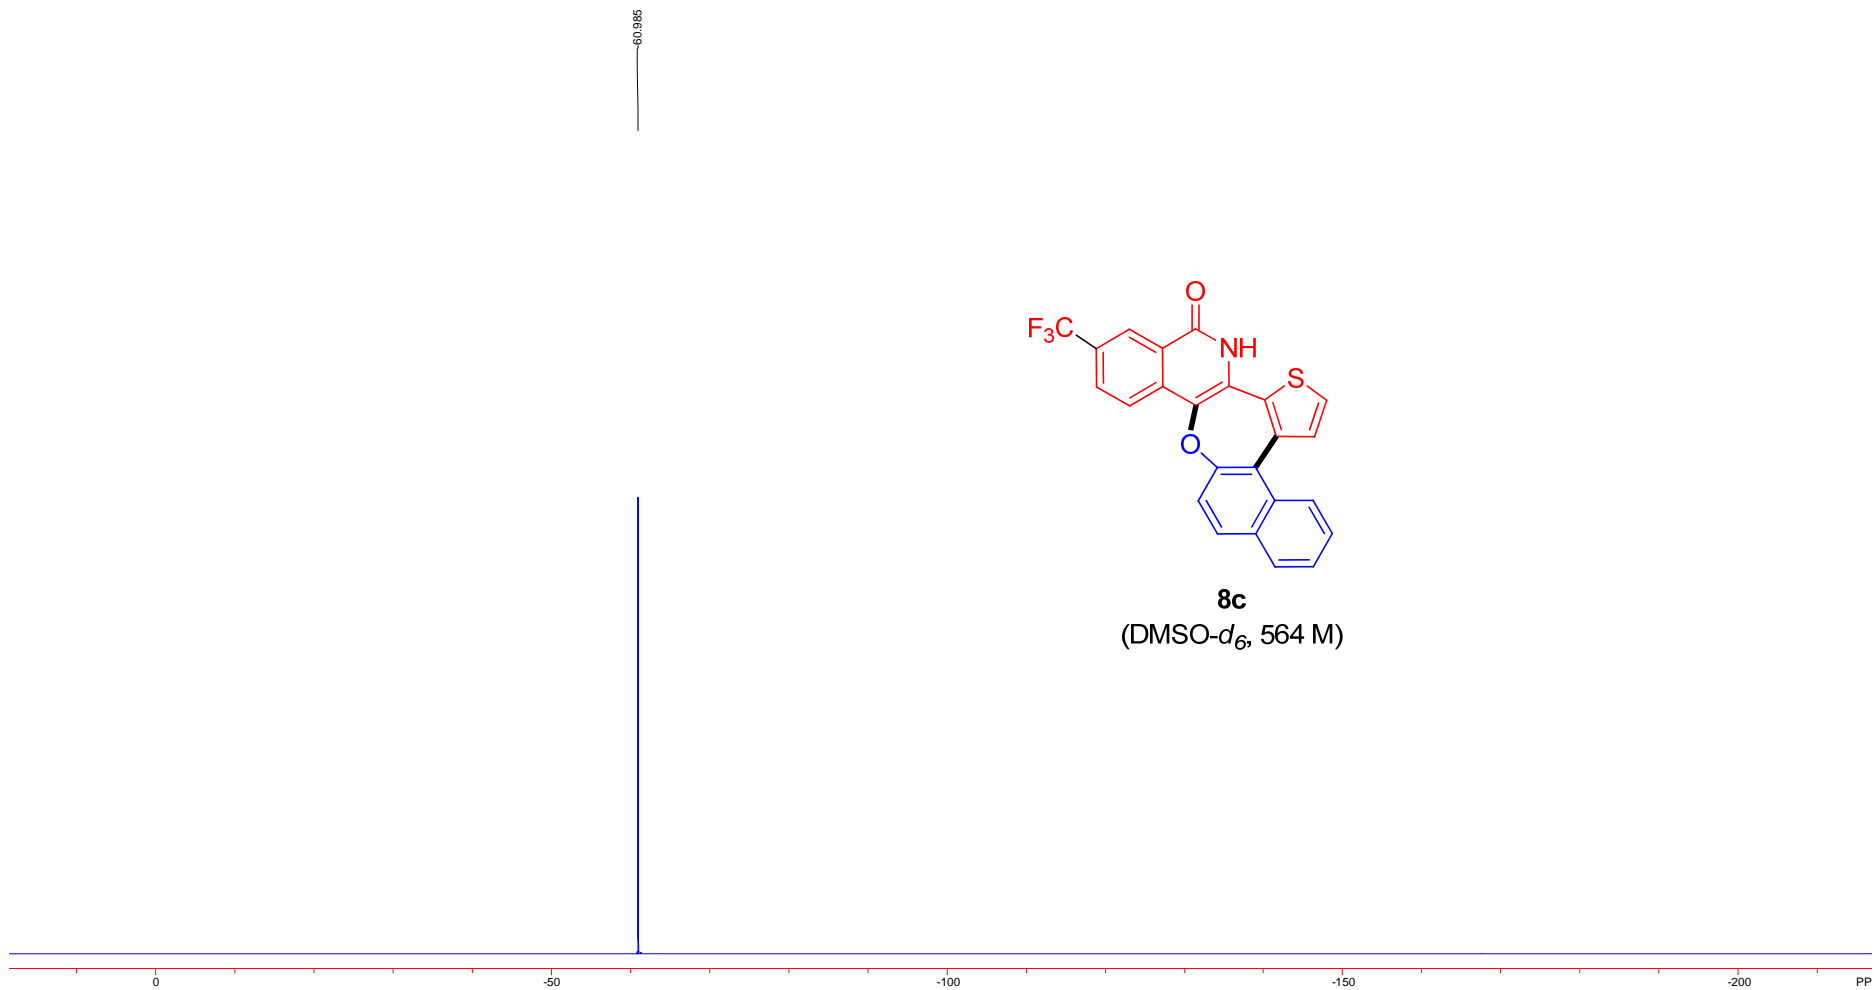

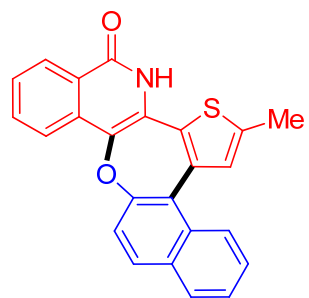

**8d**  
(CDCl<sub>3</sub>, 400 M)

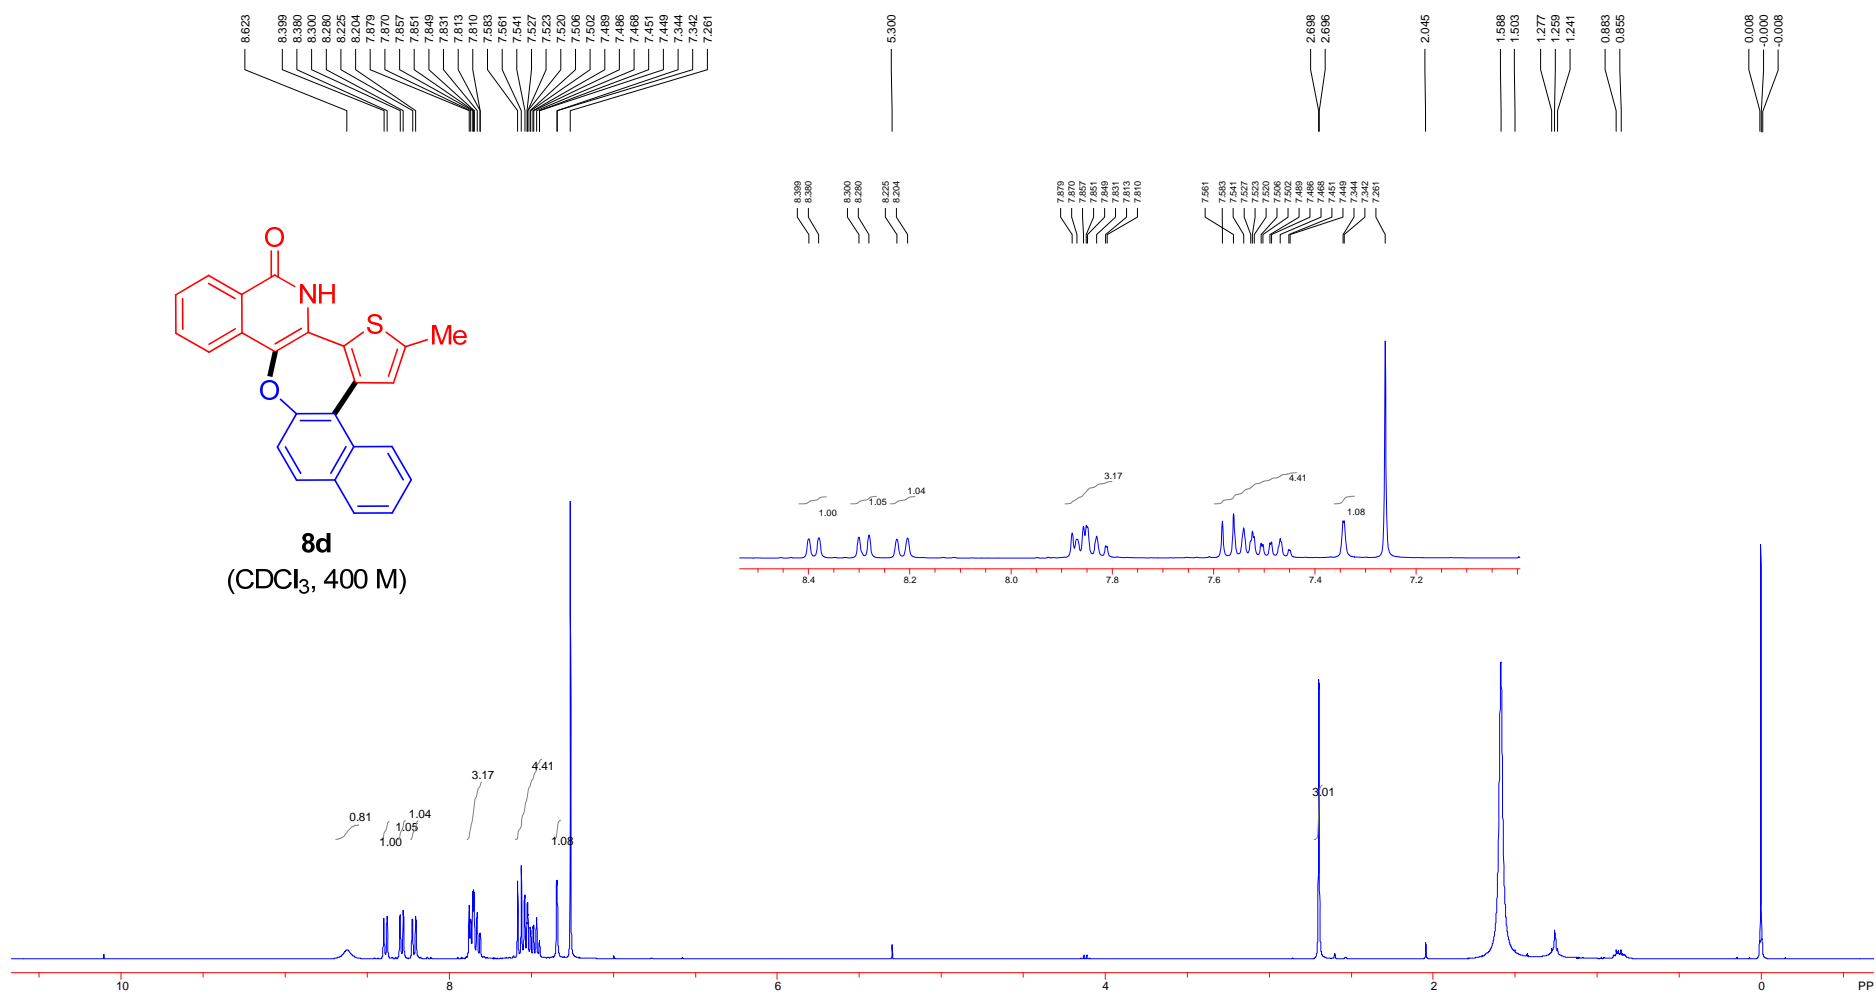

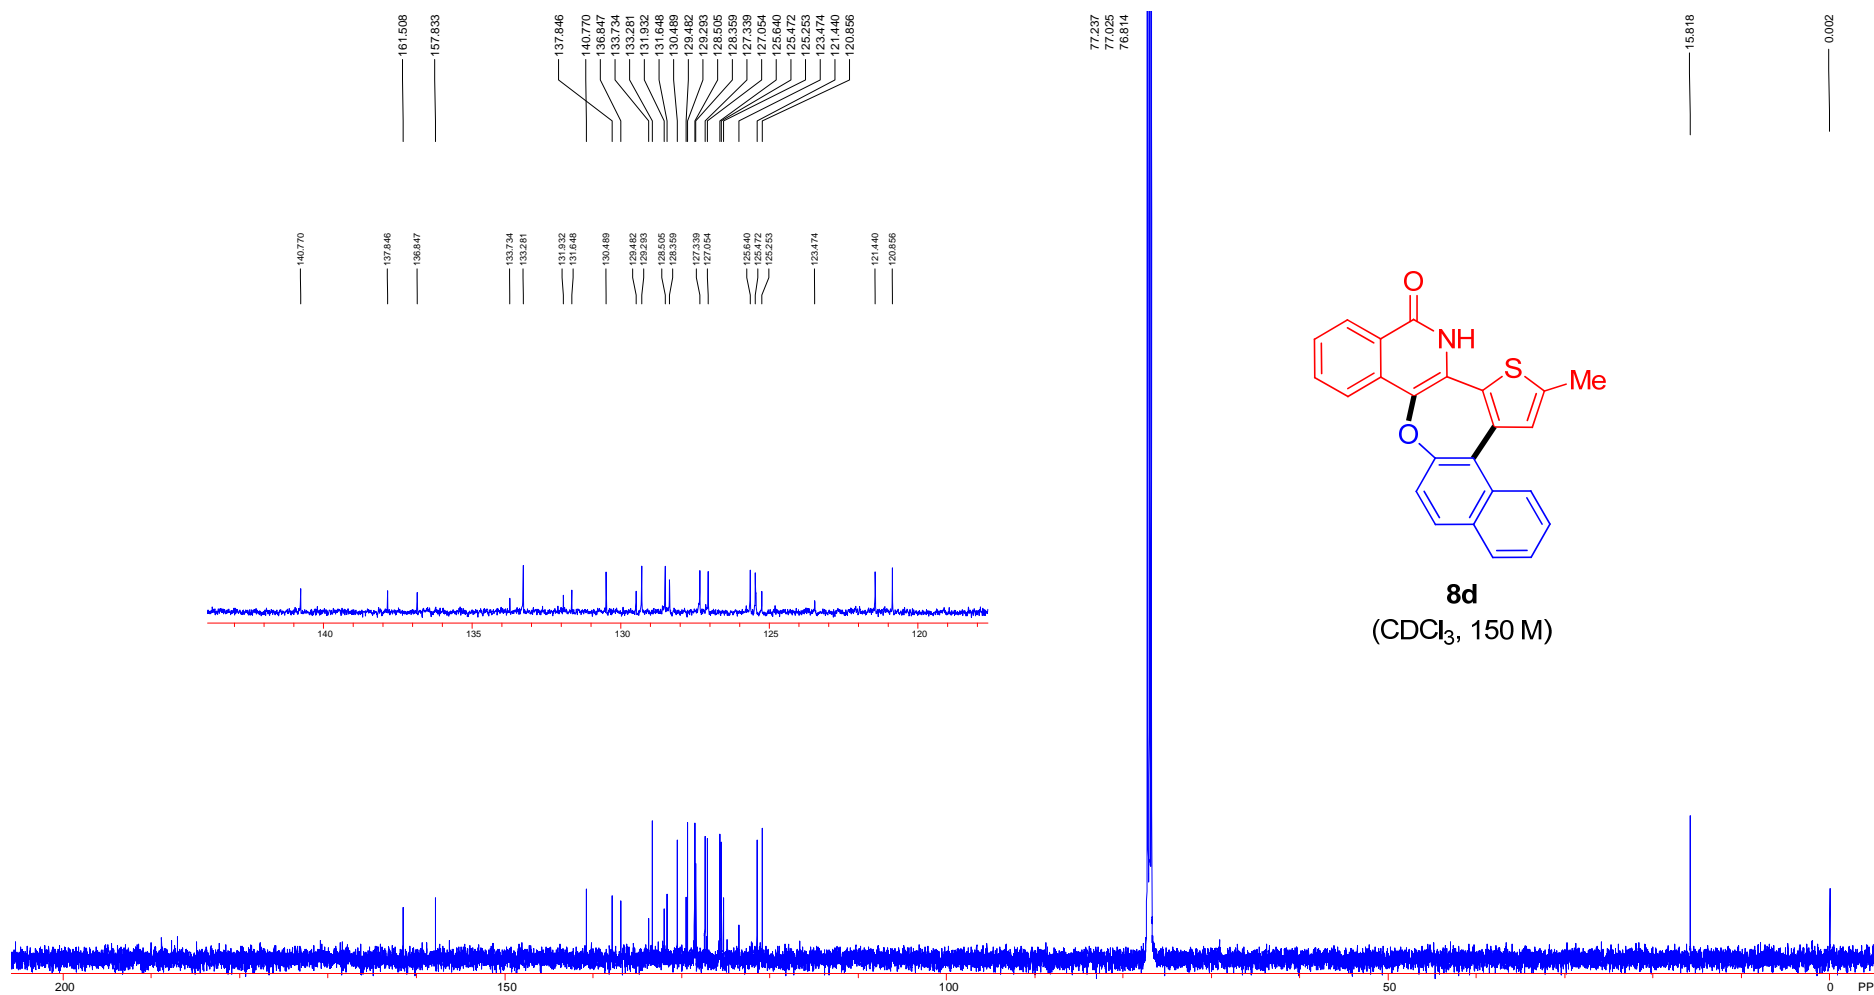

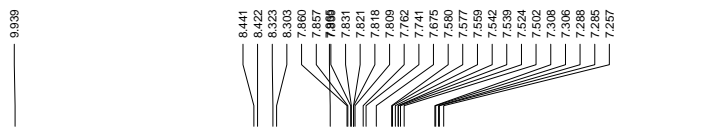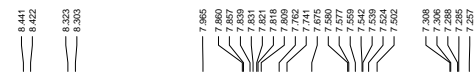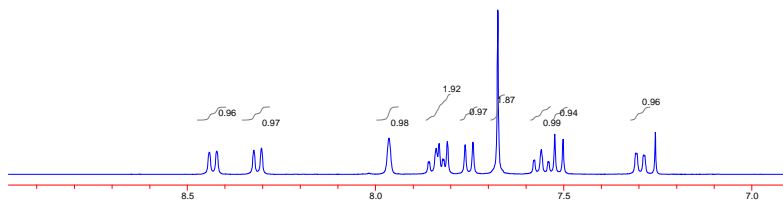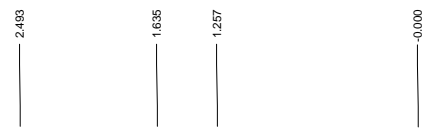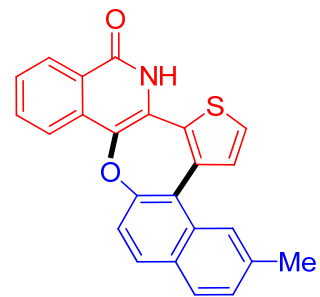

**8e**  
(CDCl<sub>3</sub>, 400 M)

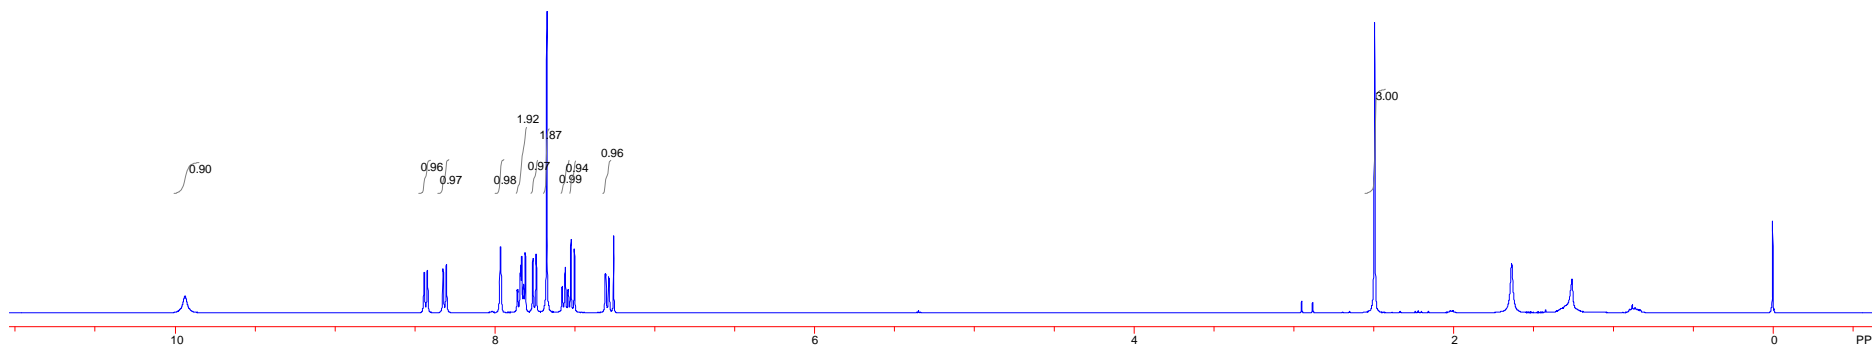



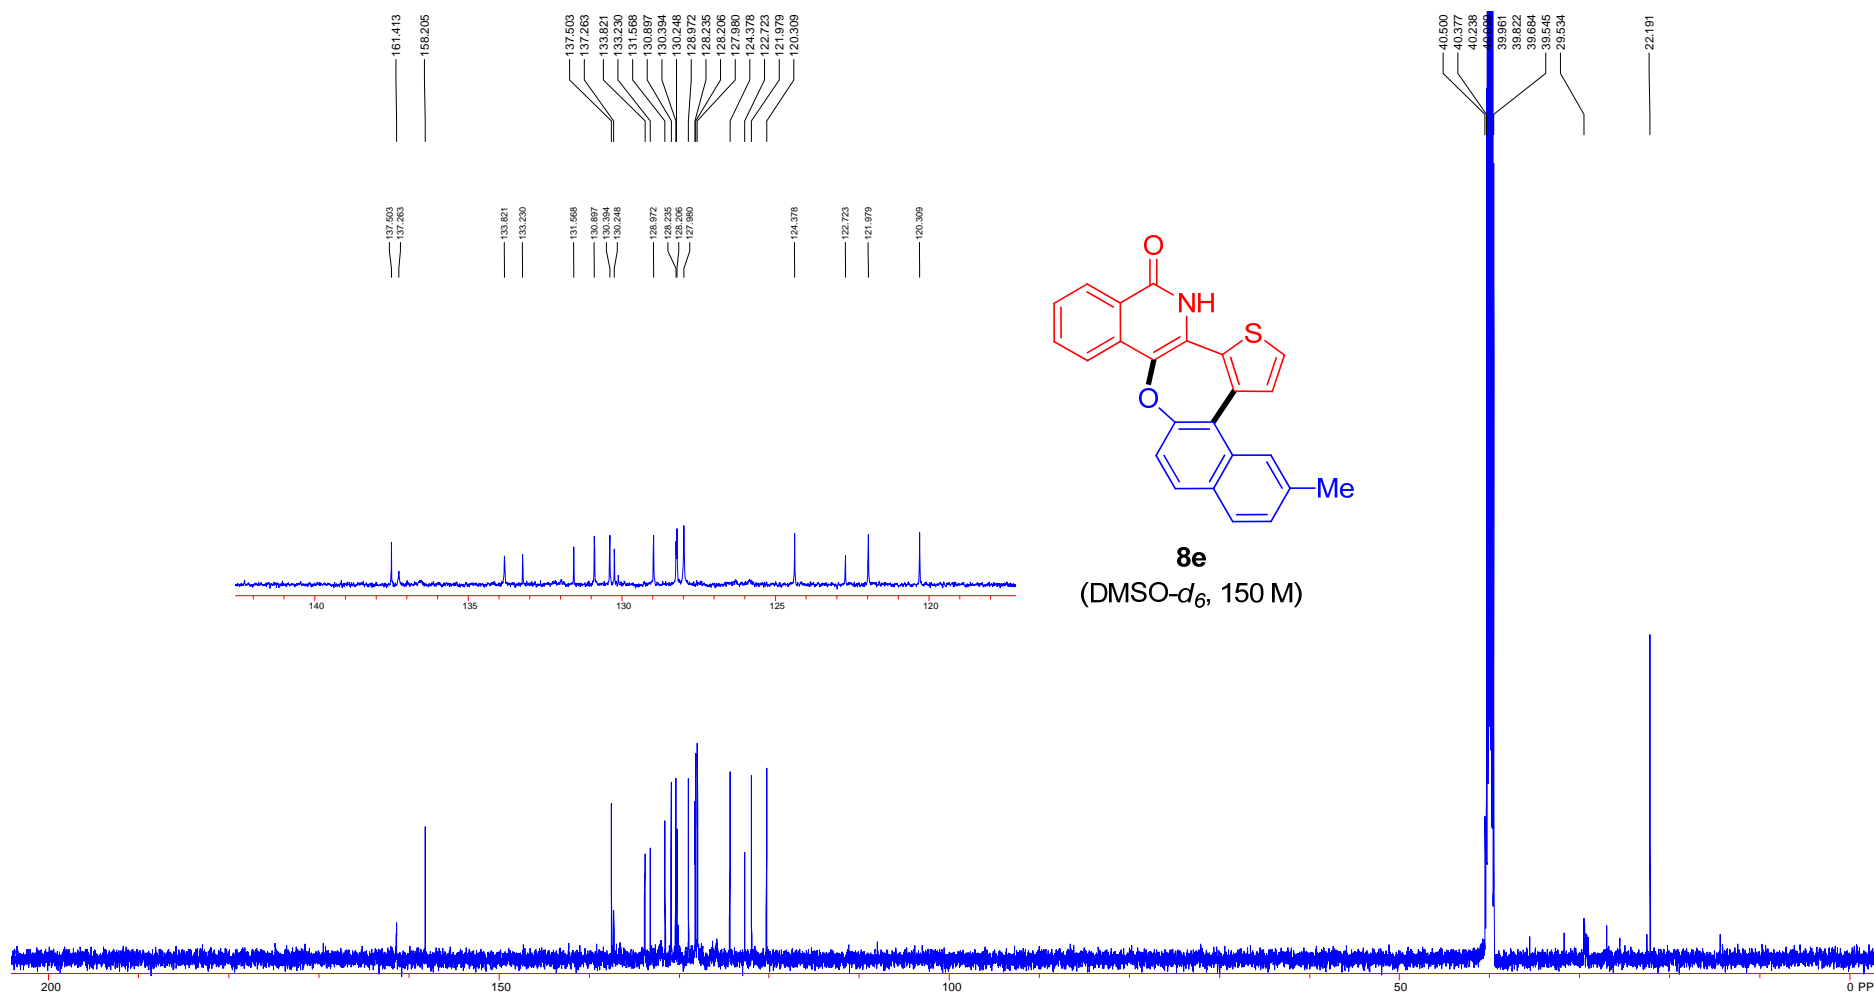

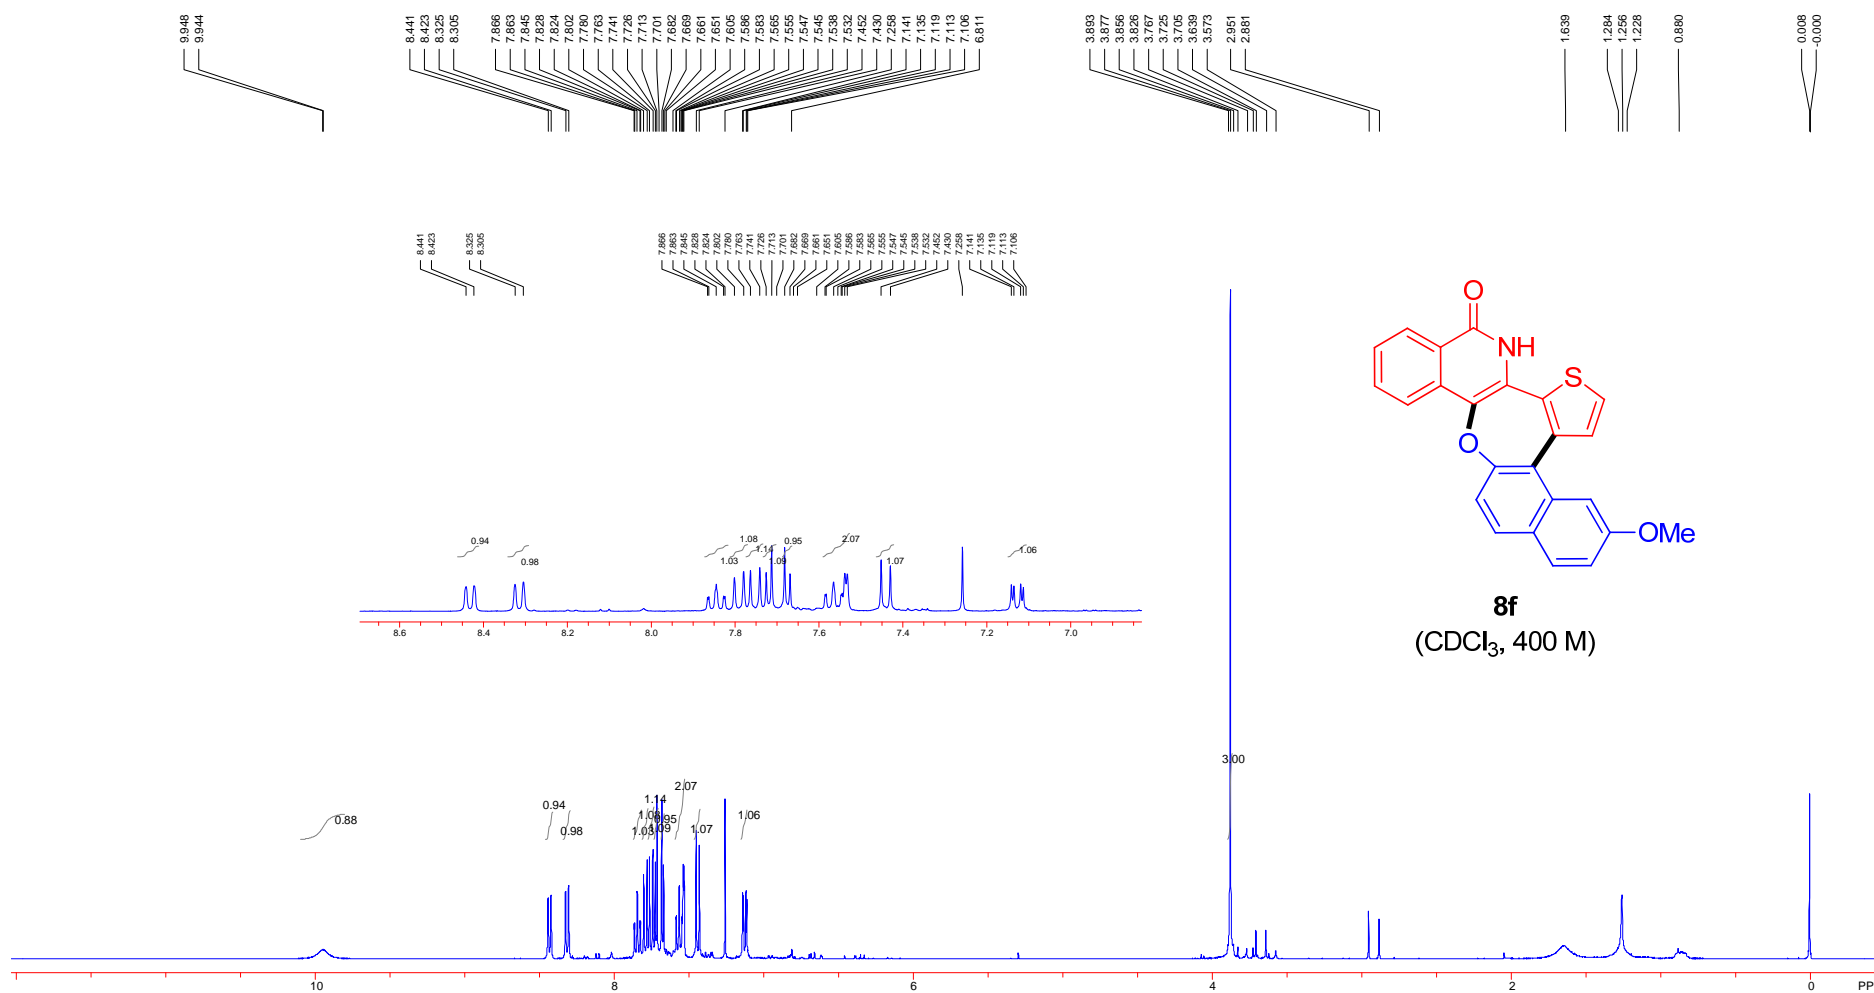

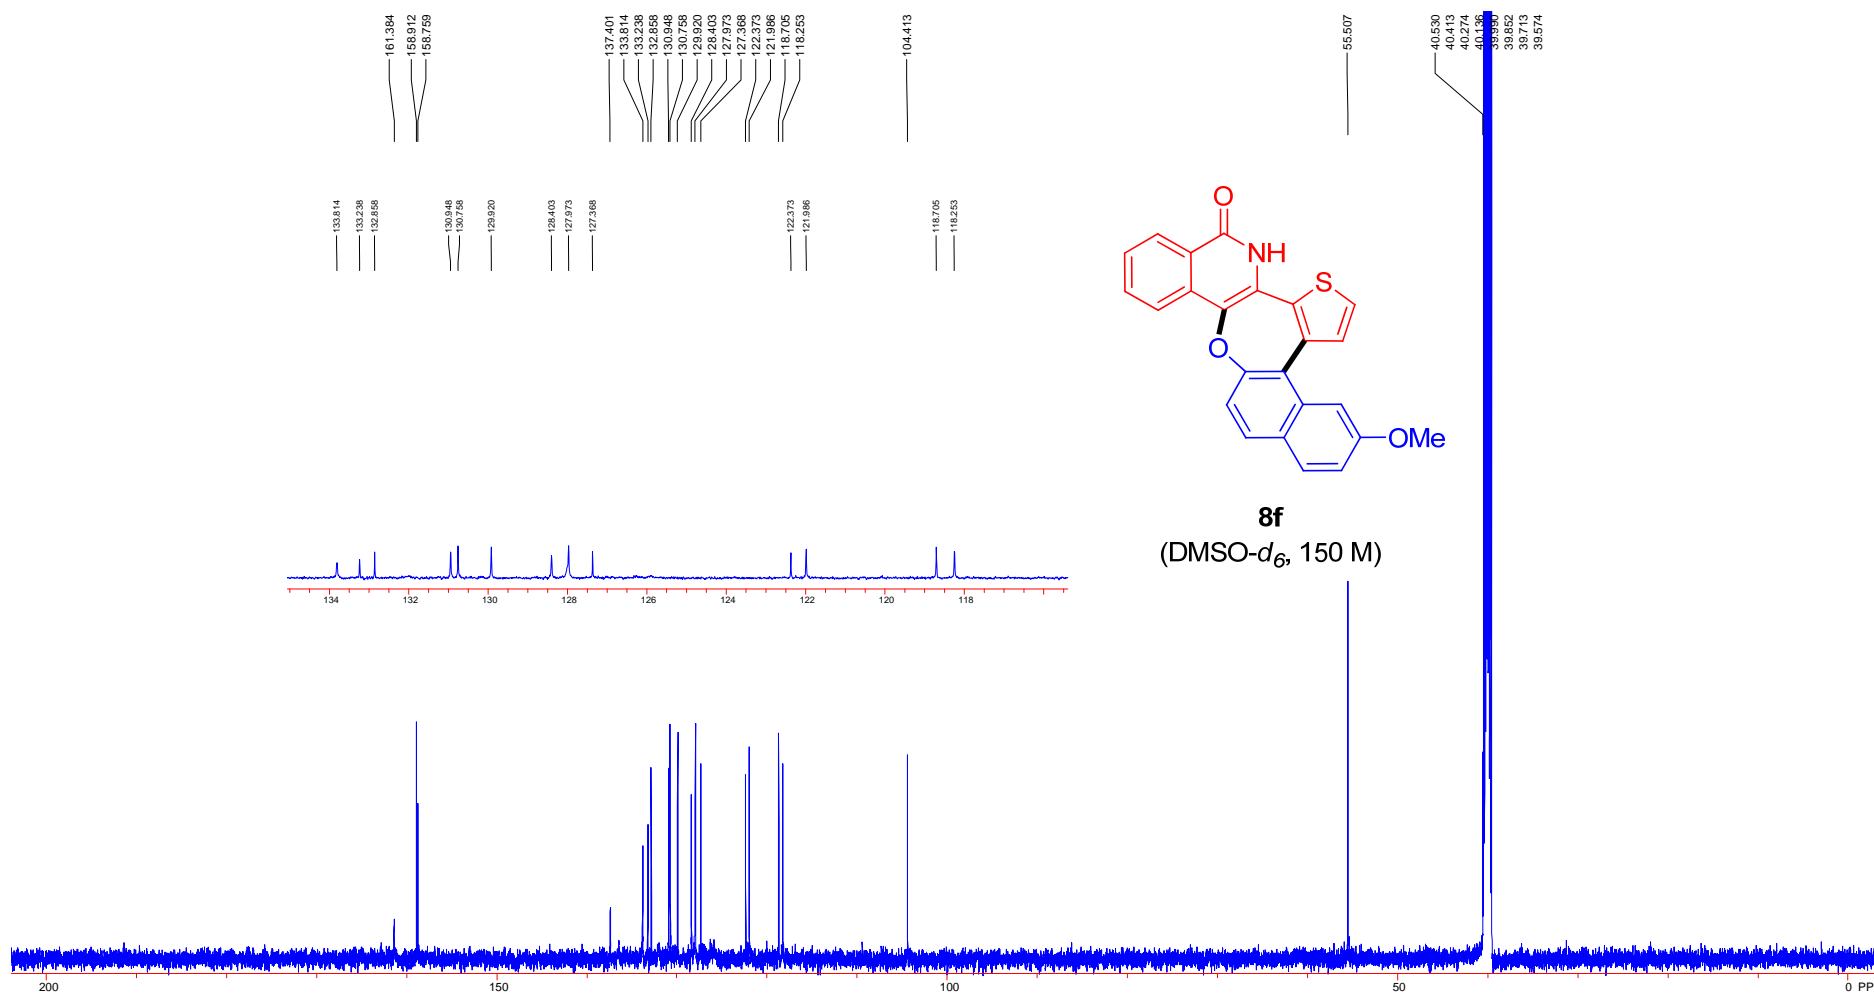

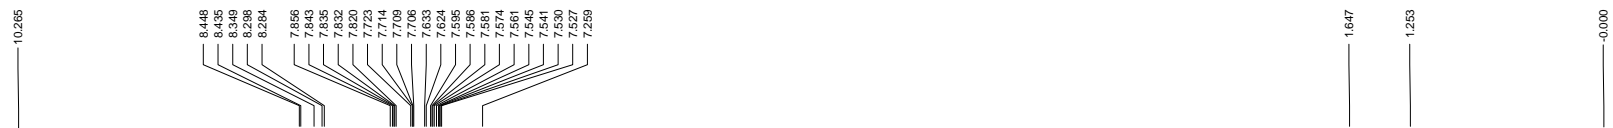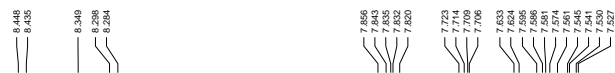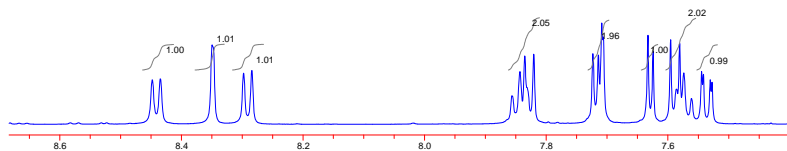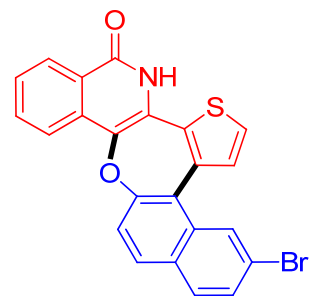

**8g**  
(CDCl<sub>3</sub>, 600 M)

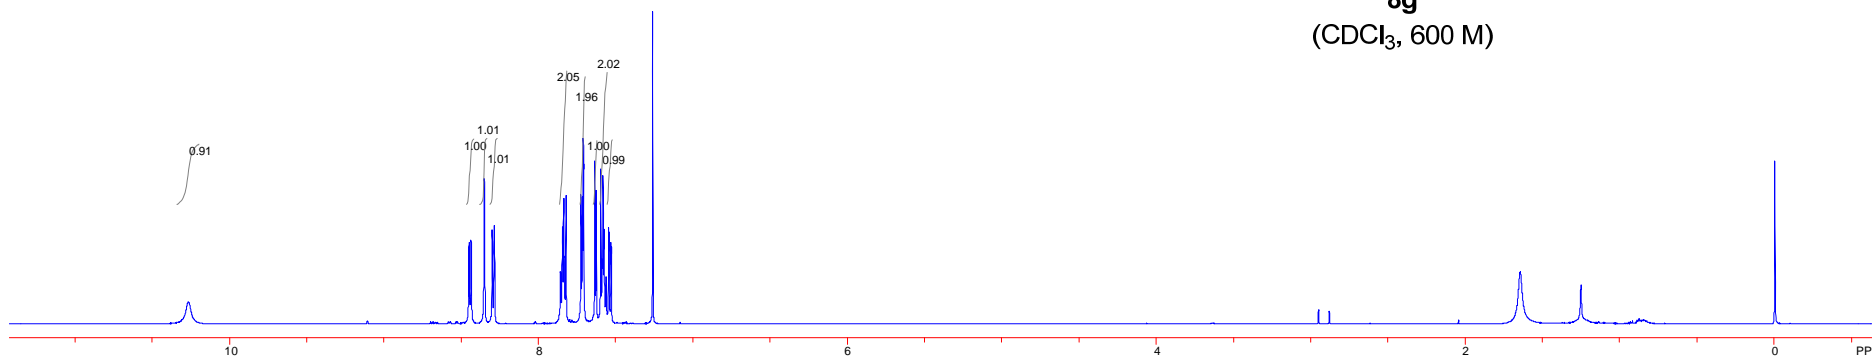

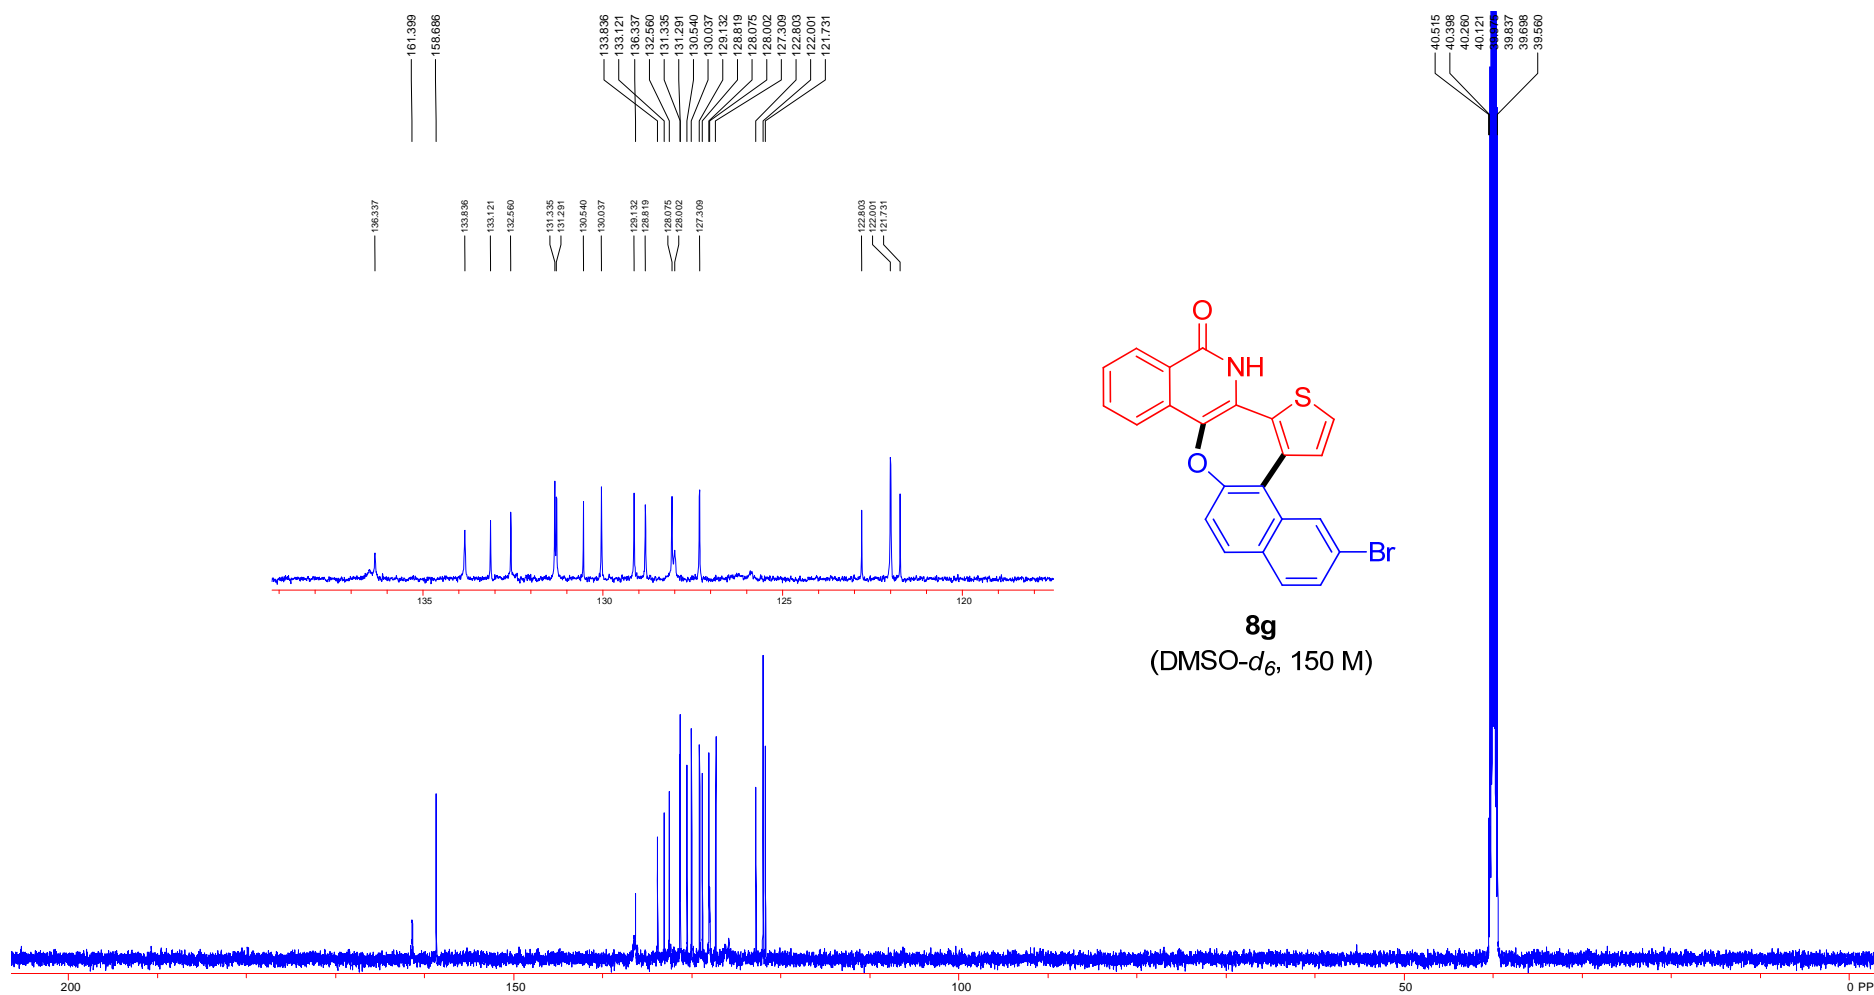

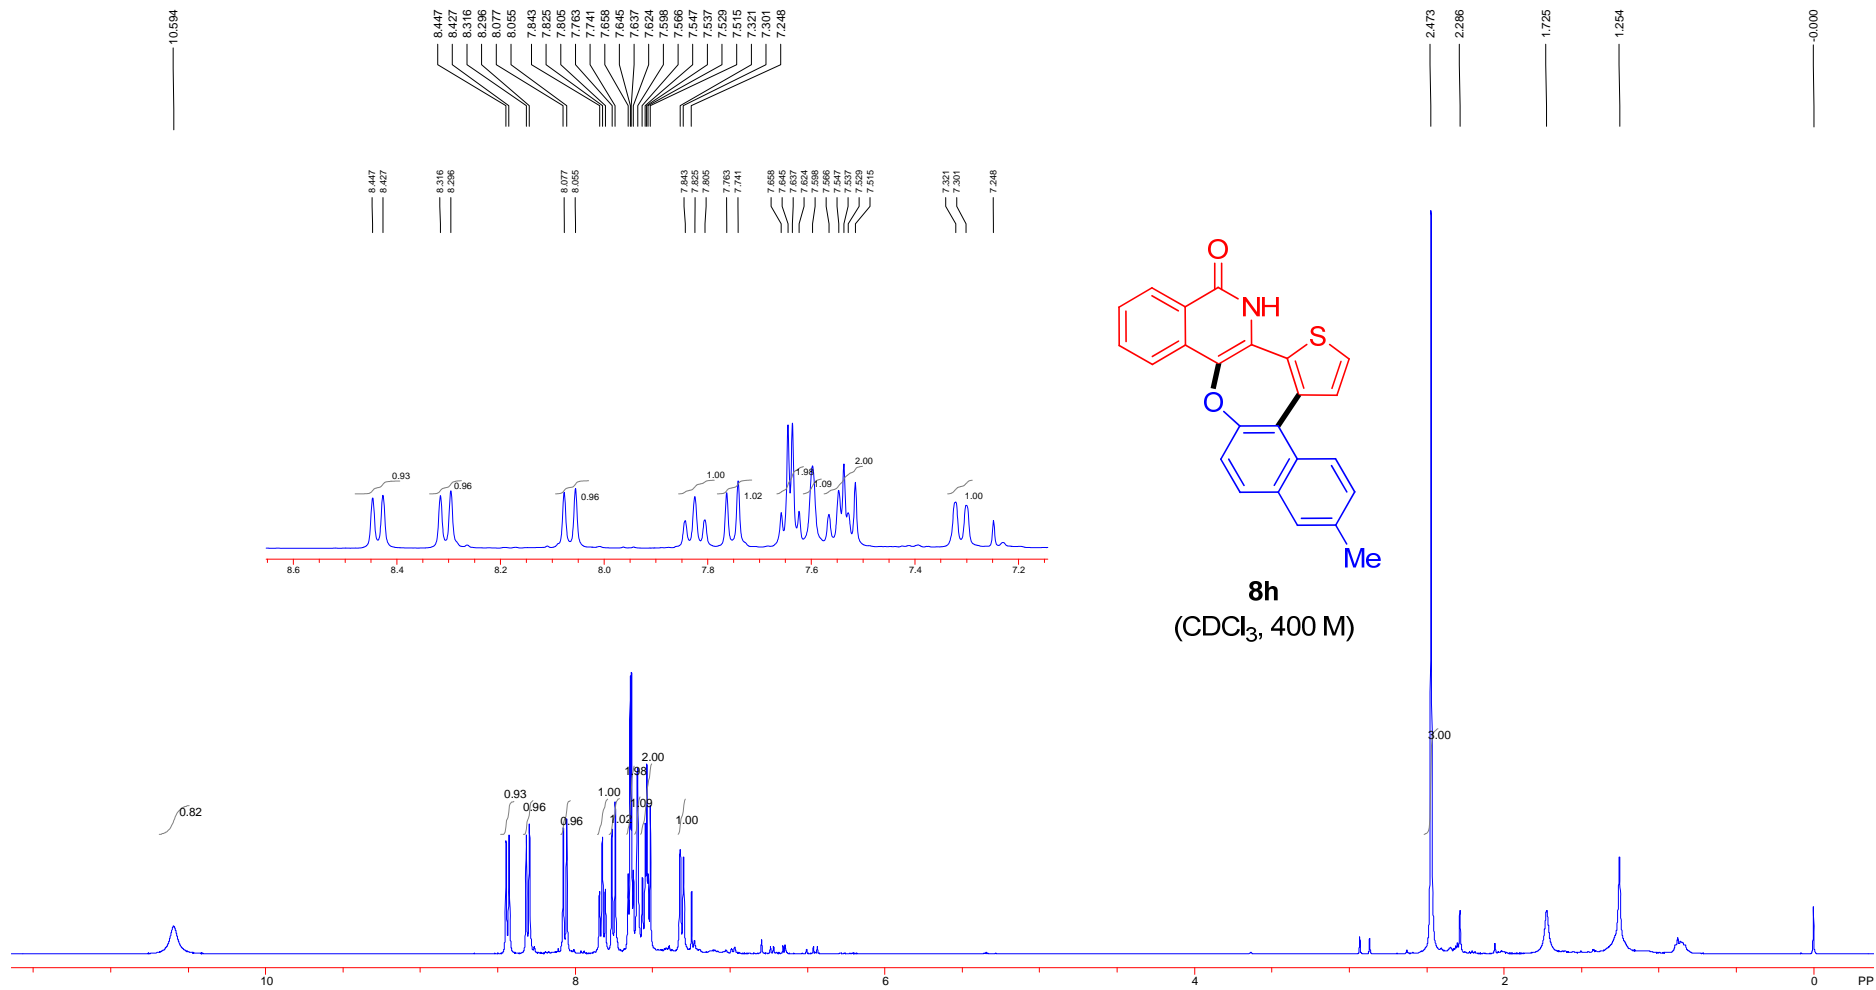

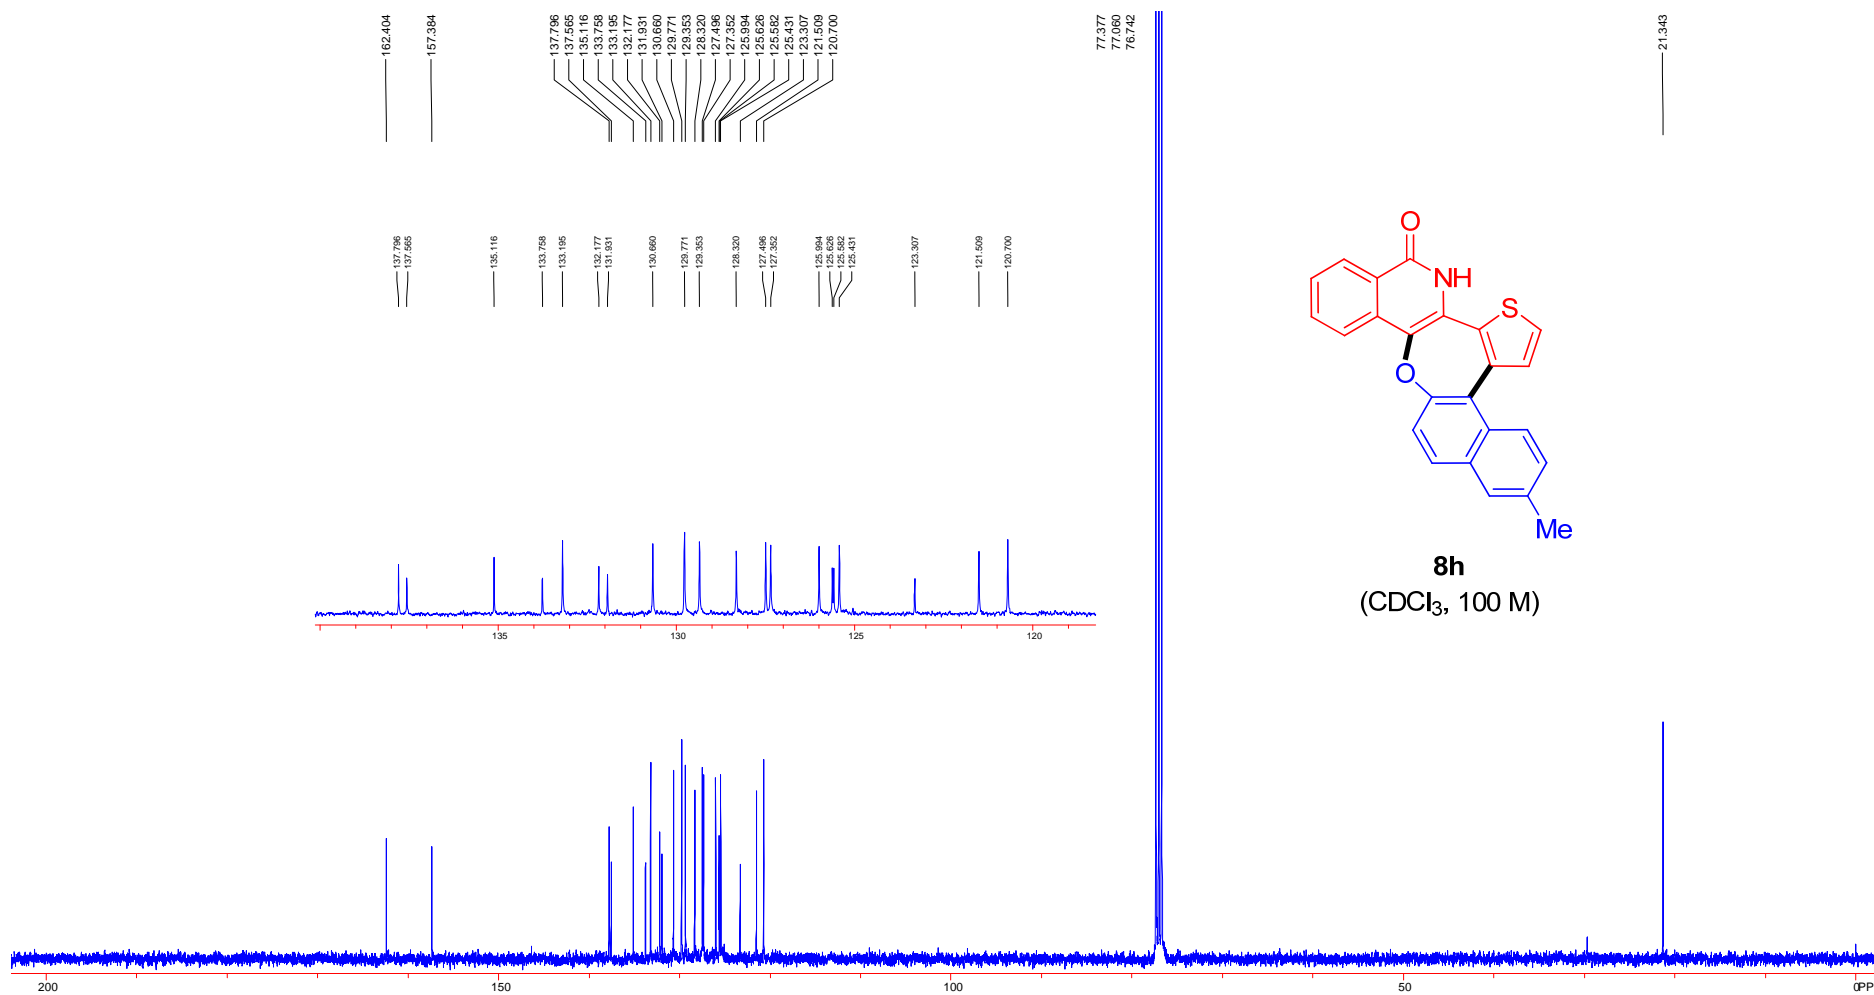

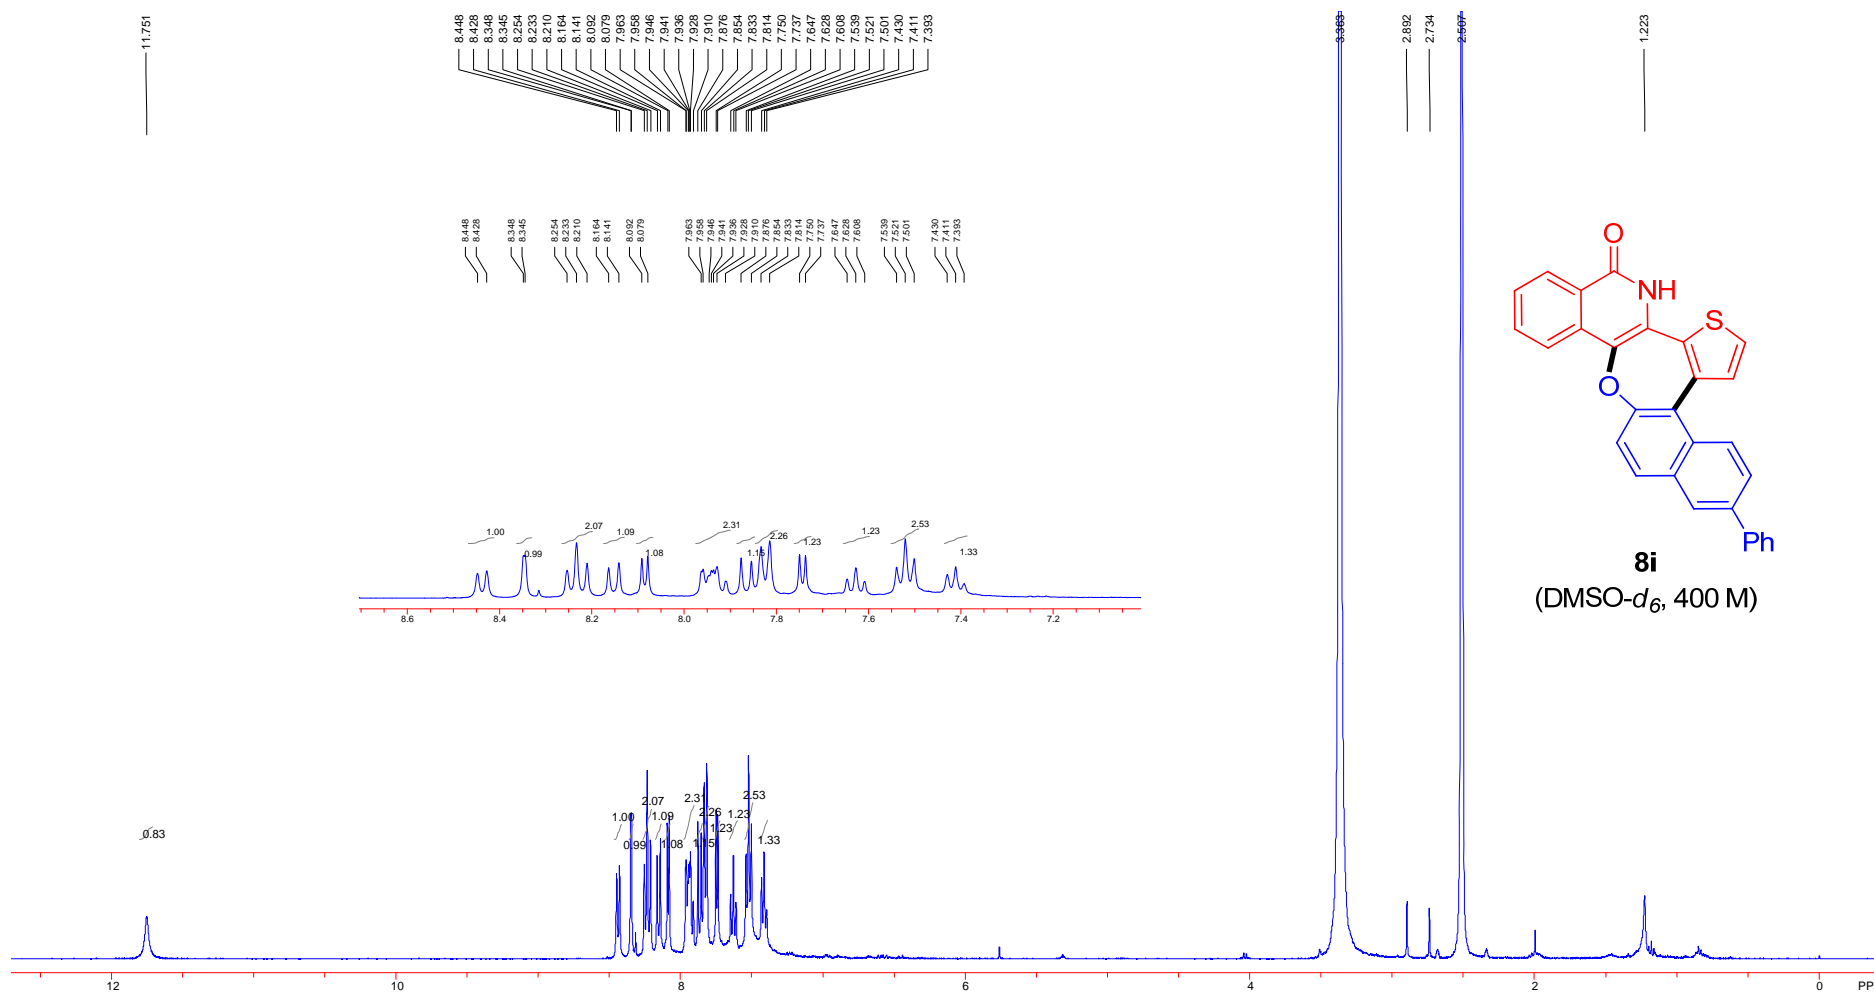



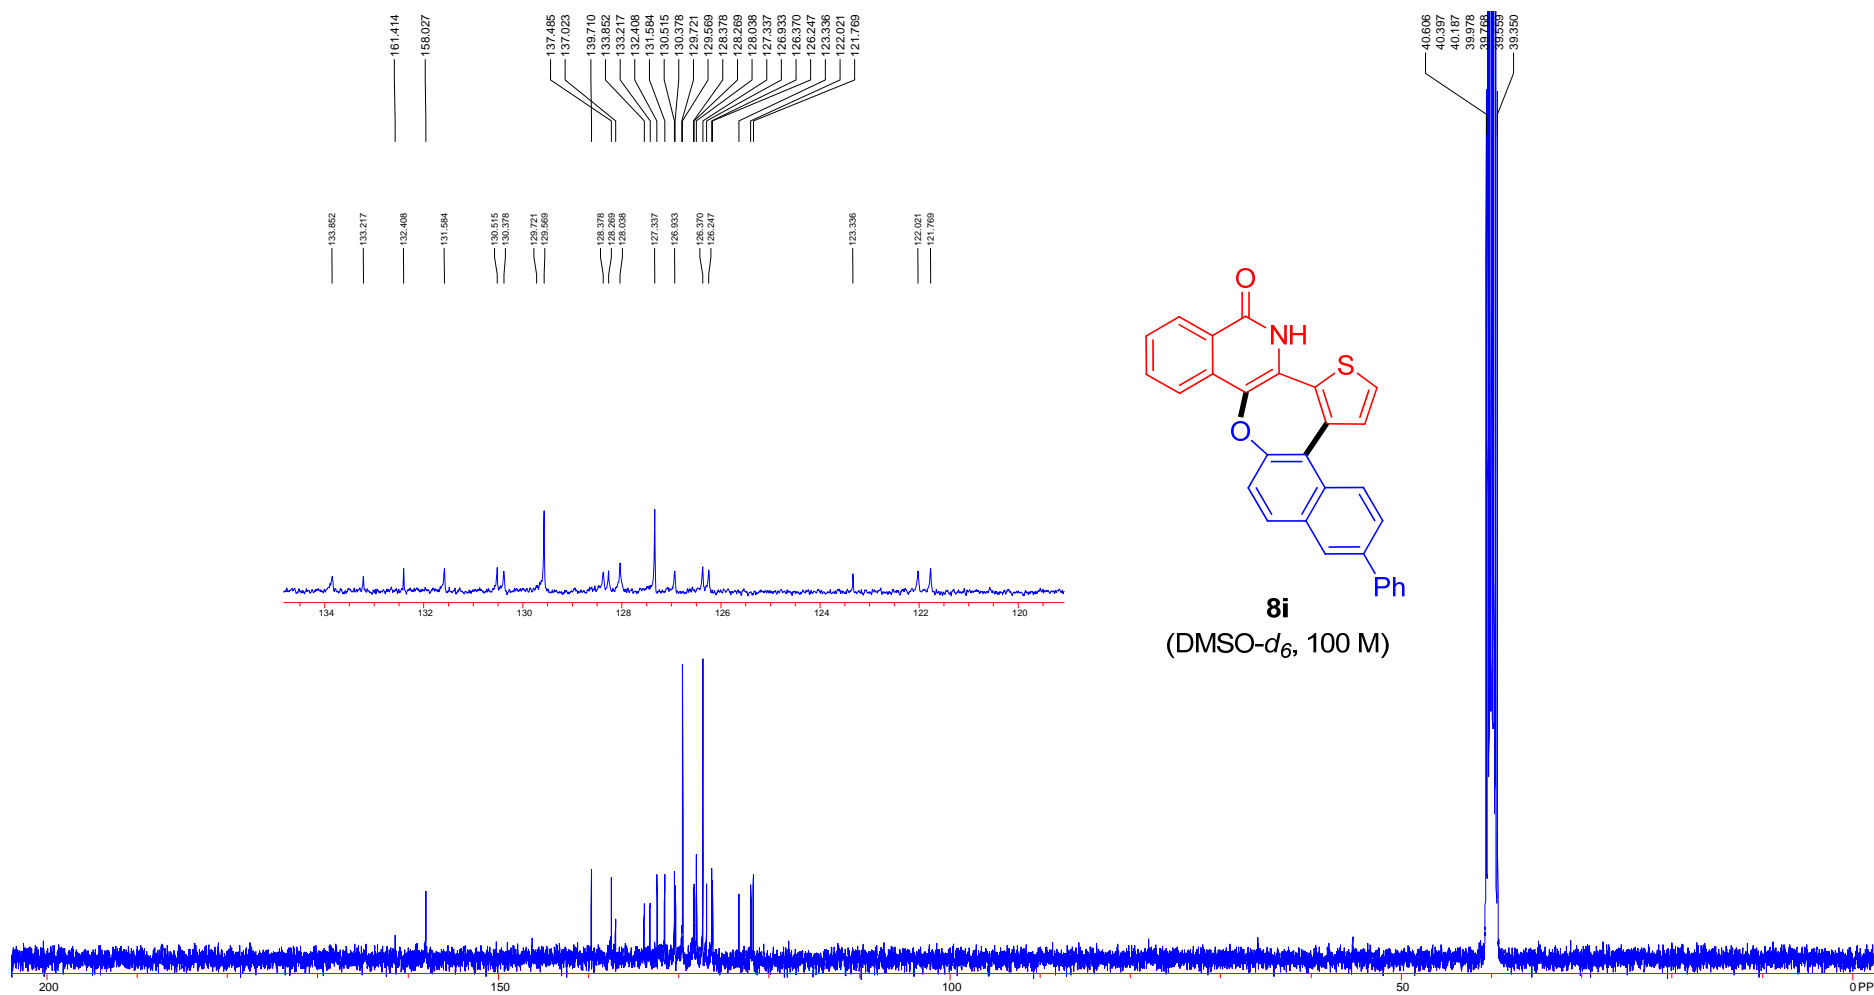

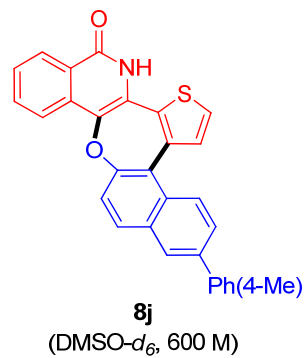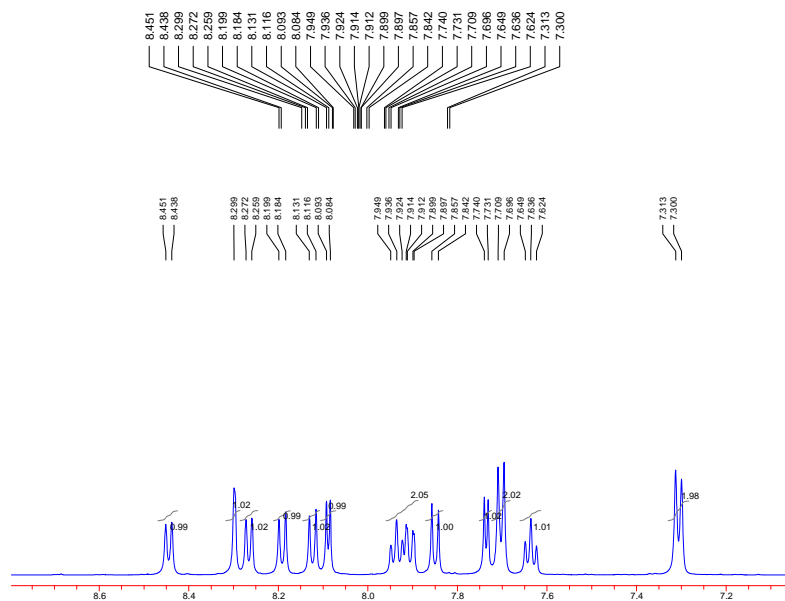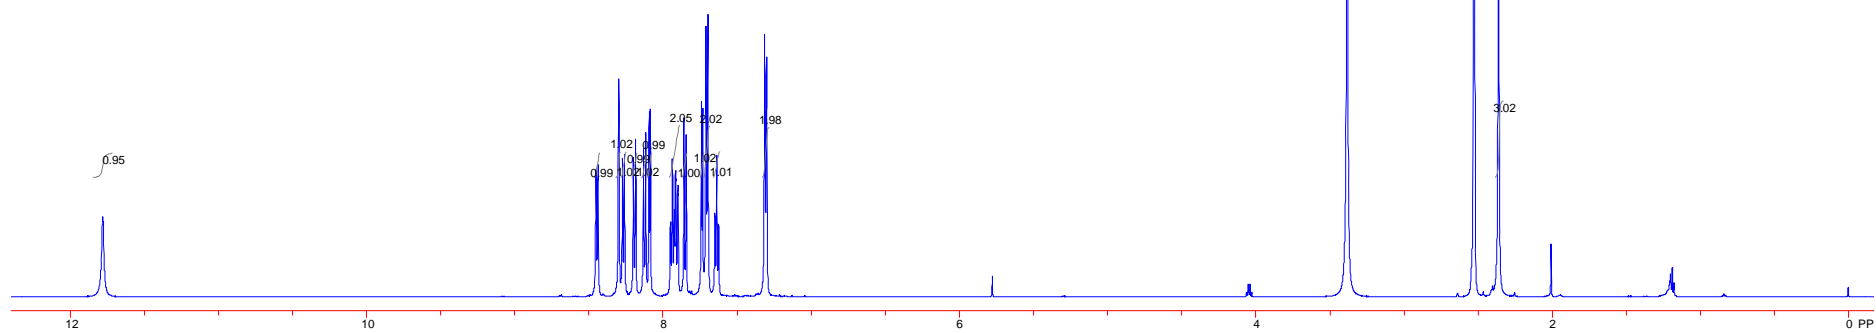

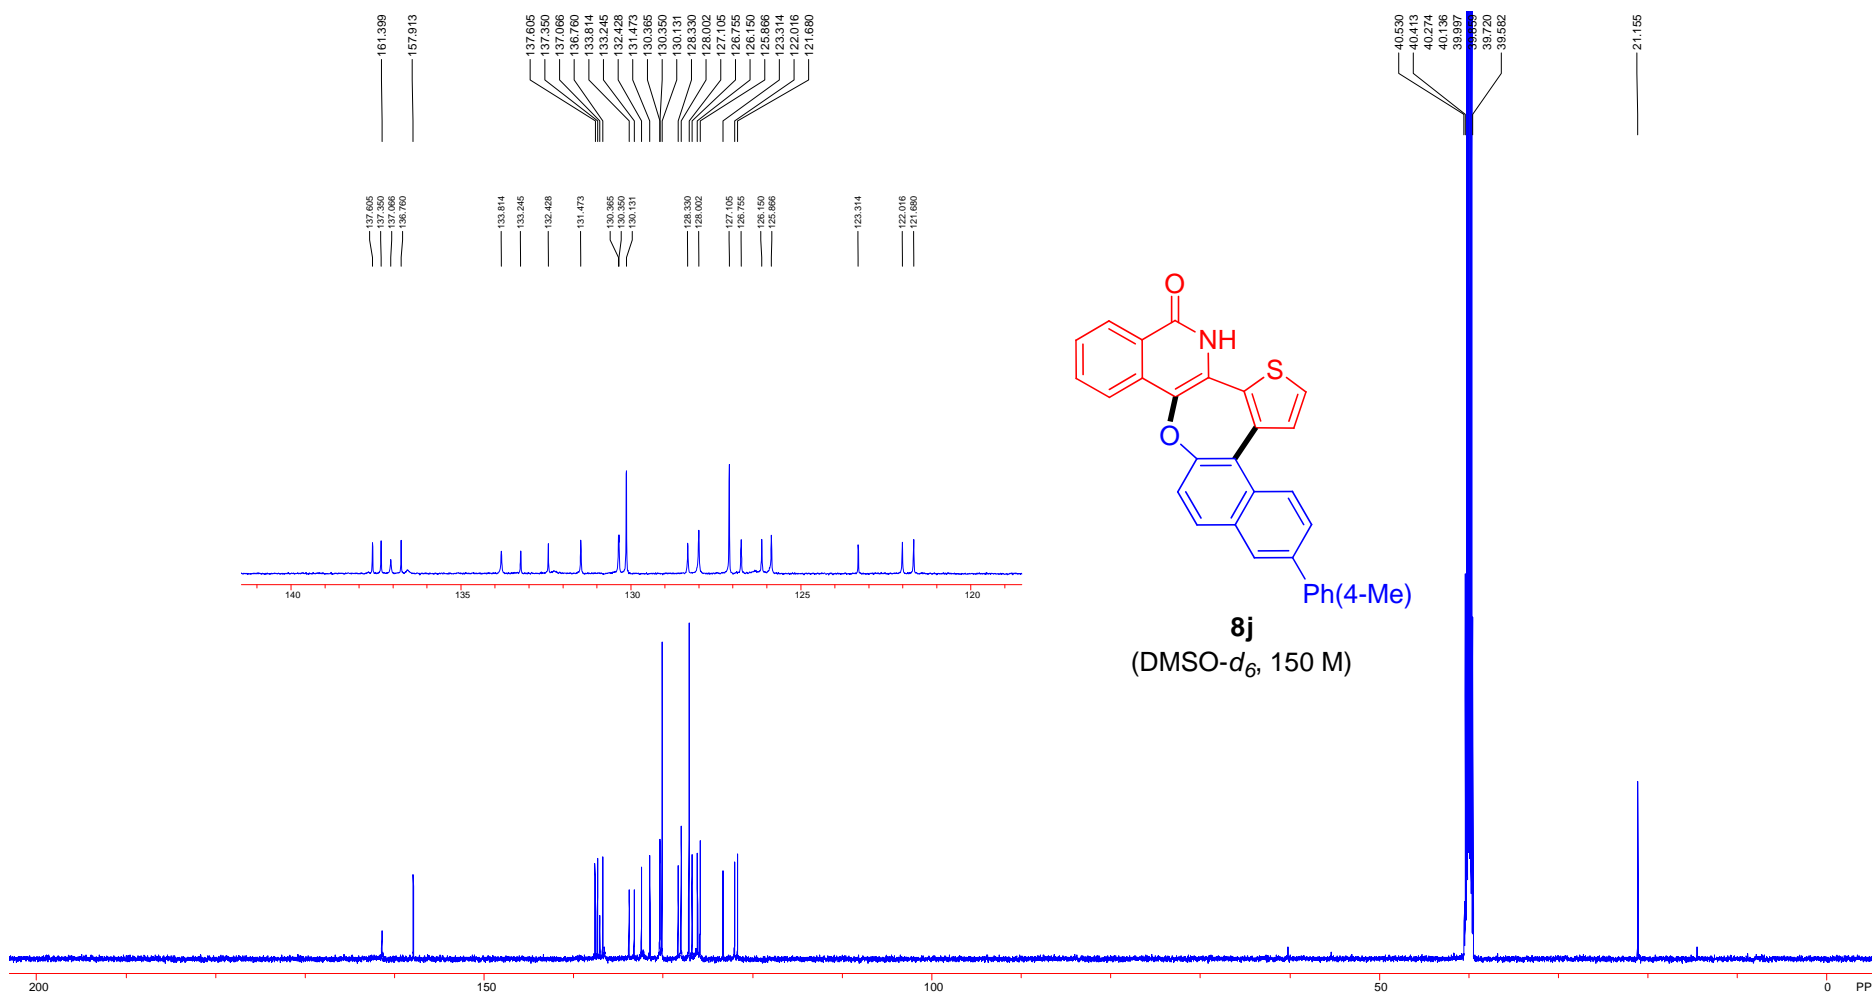

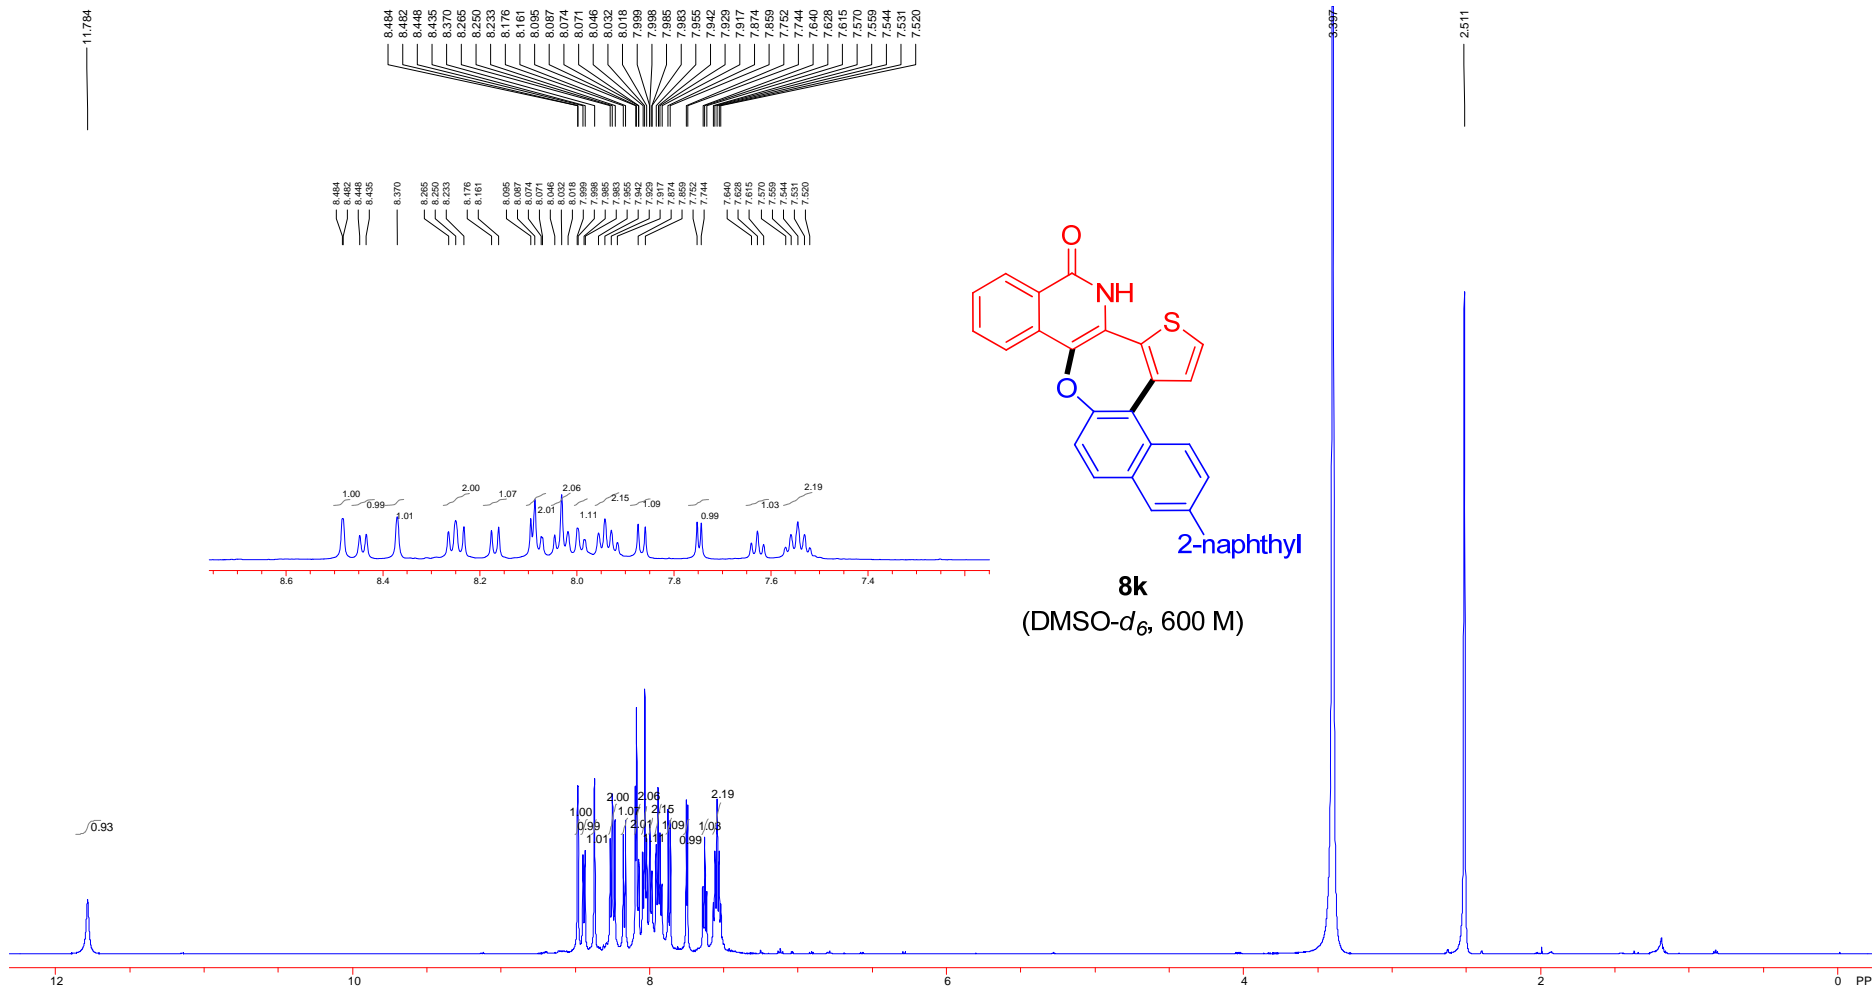

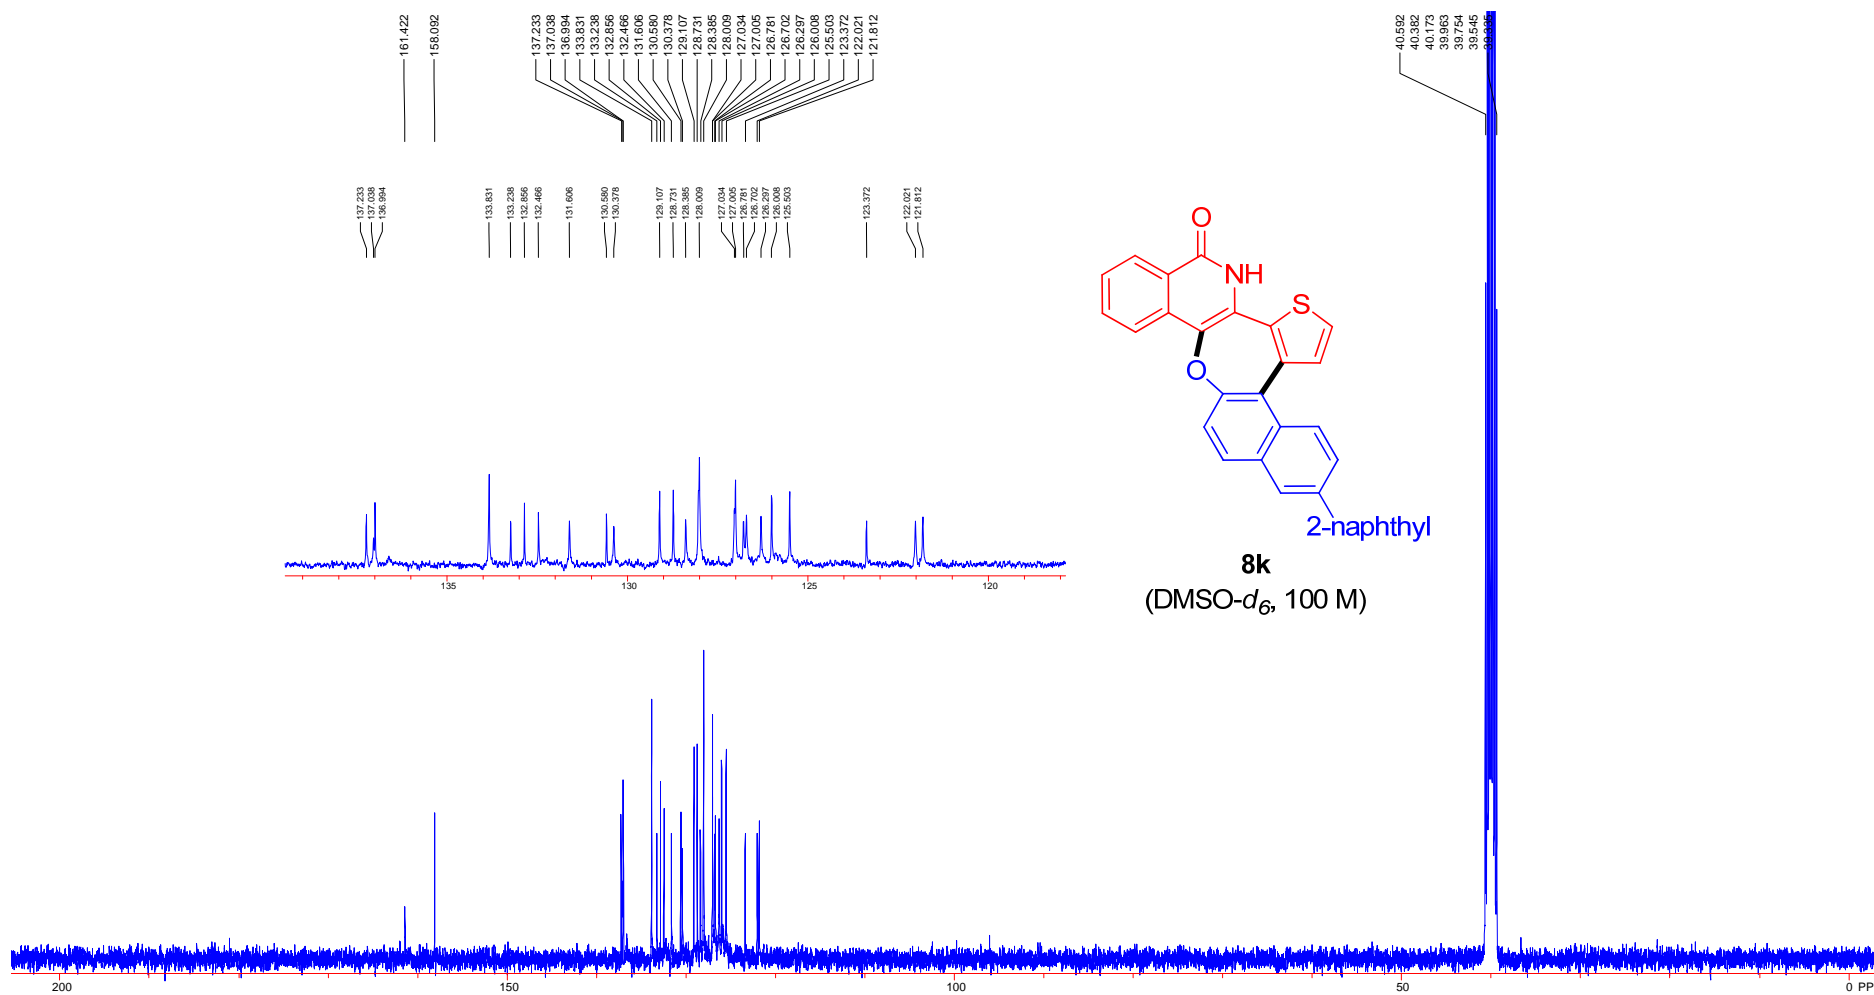

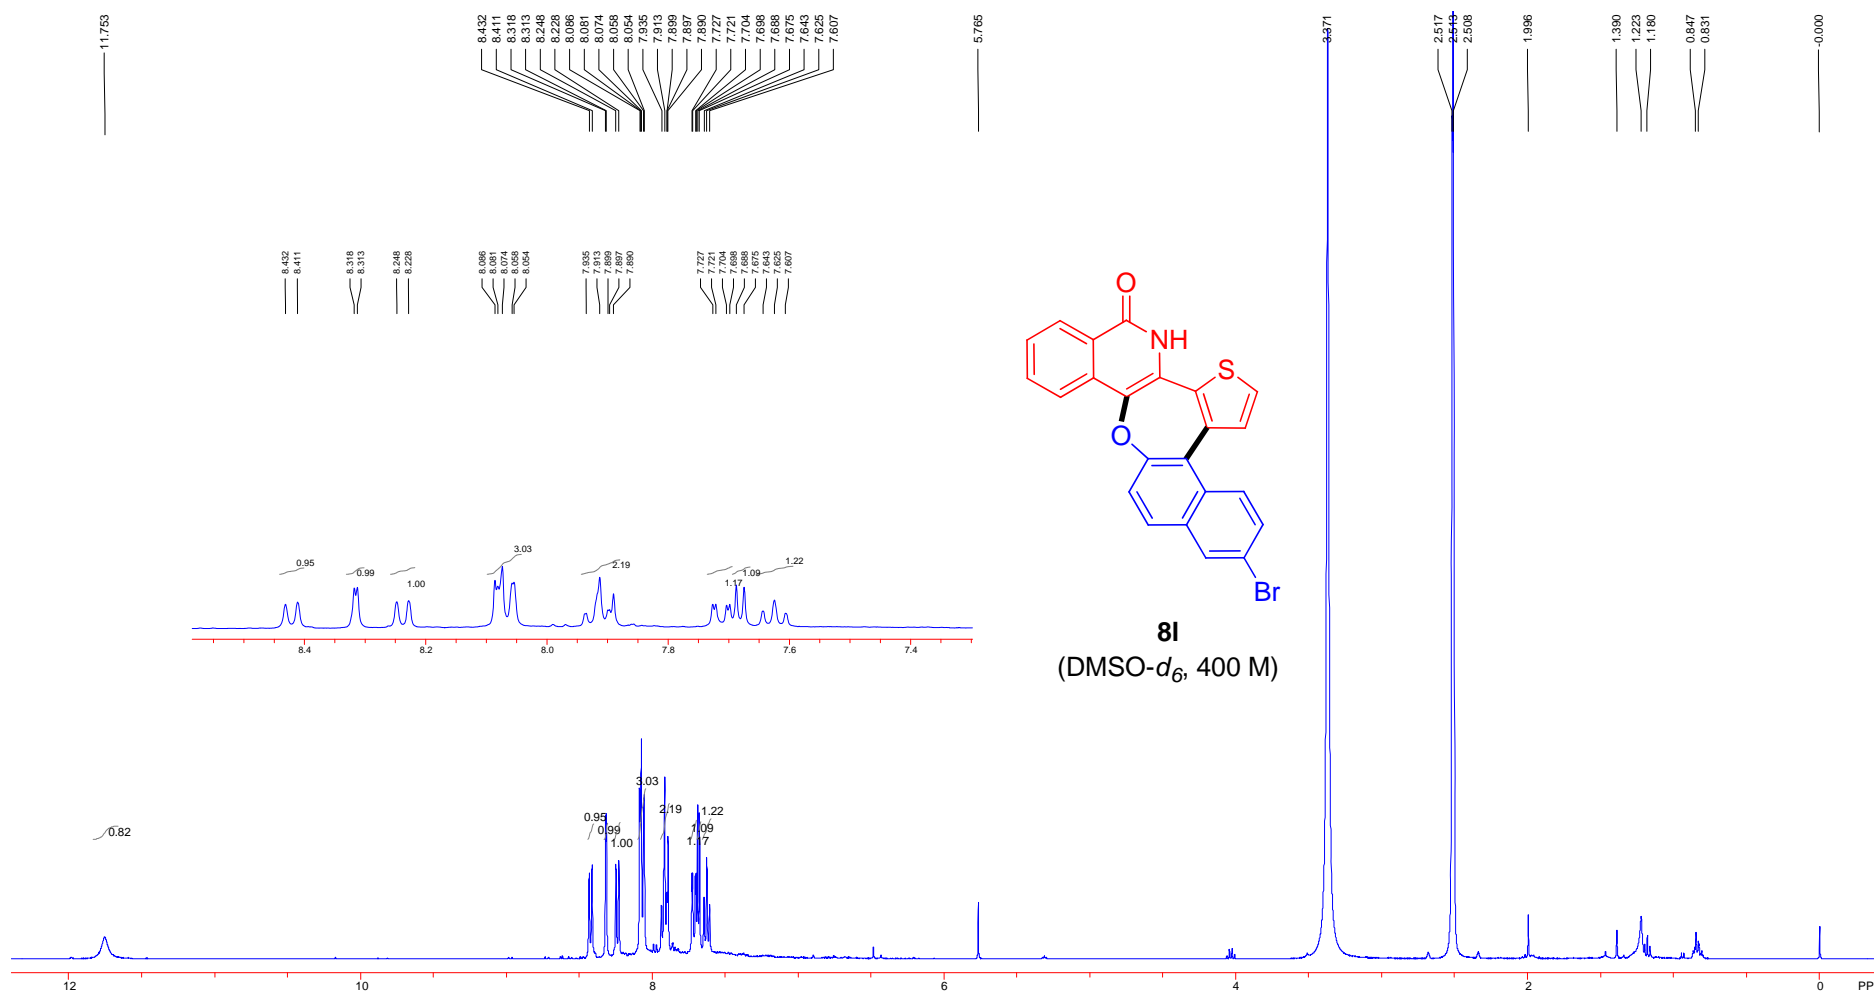

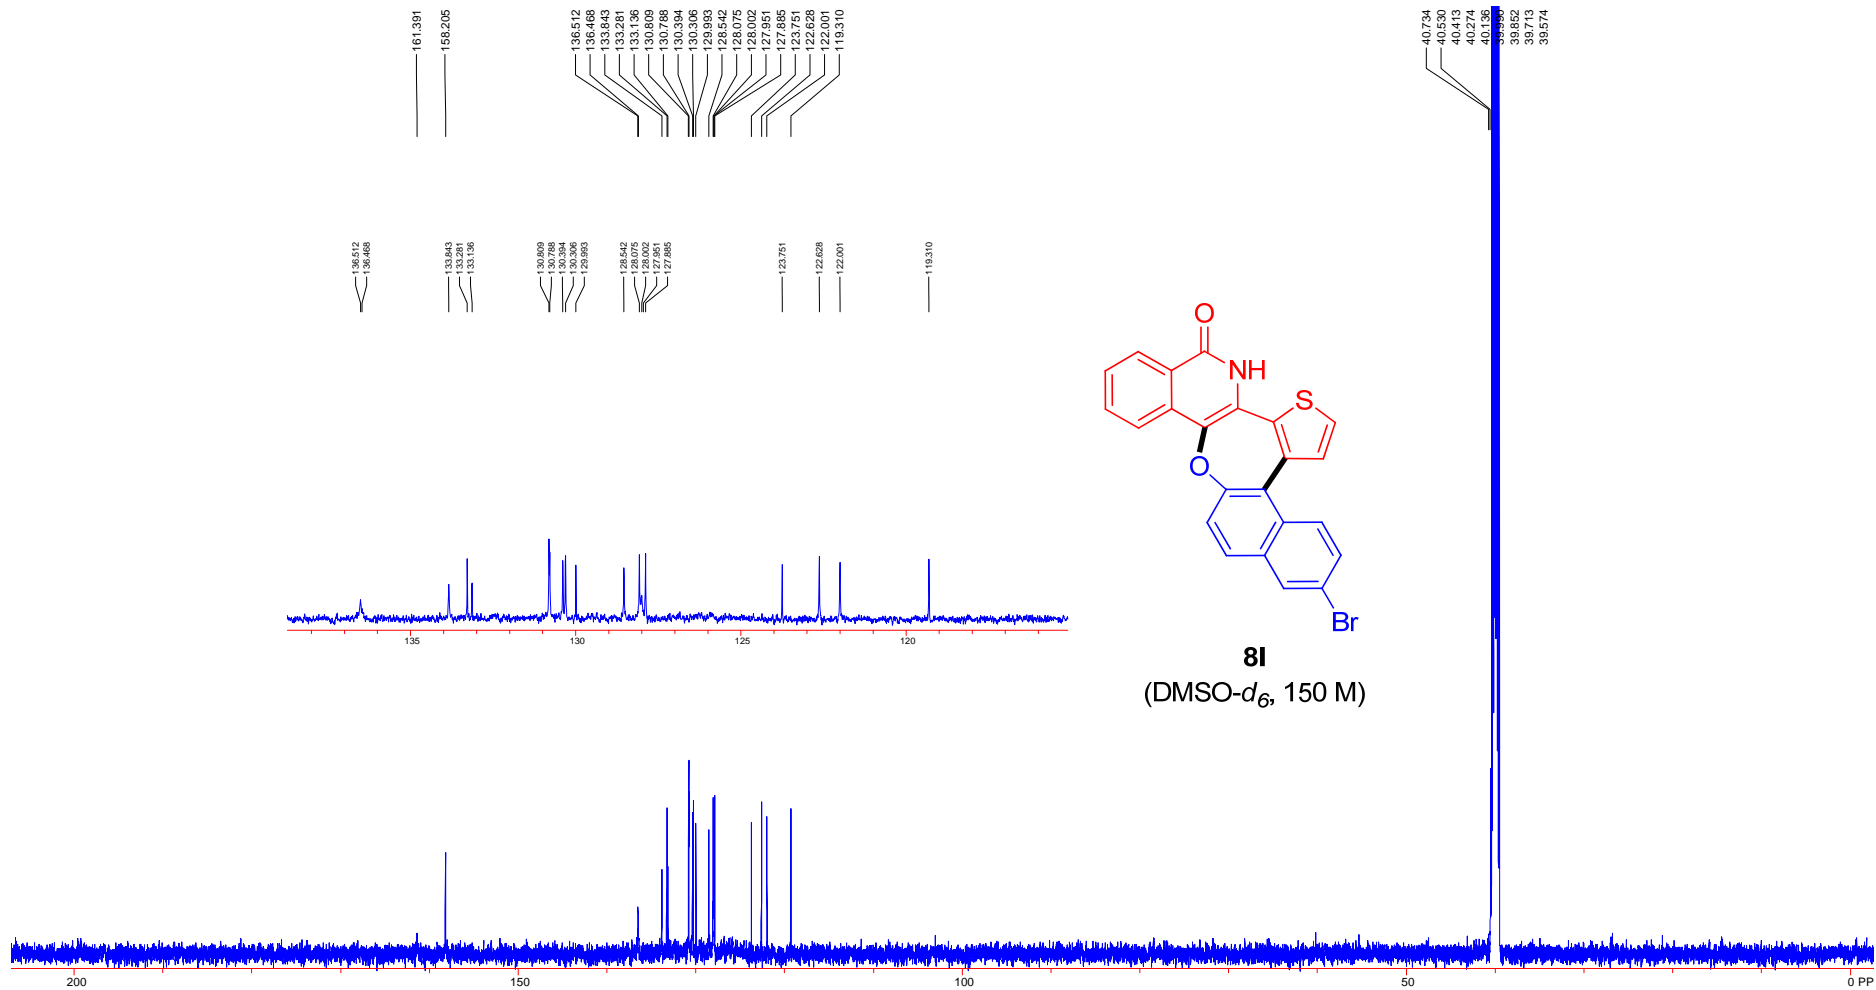

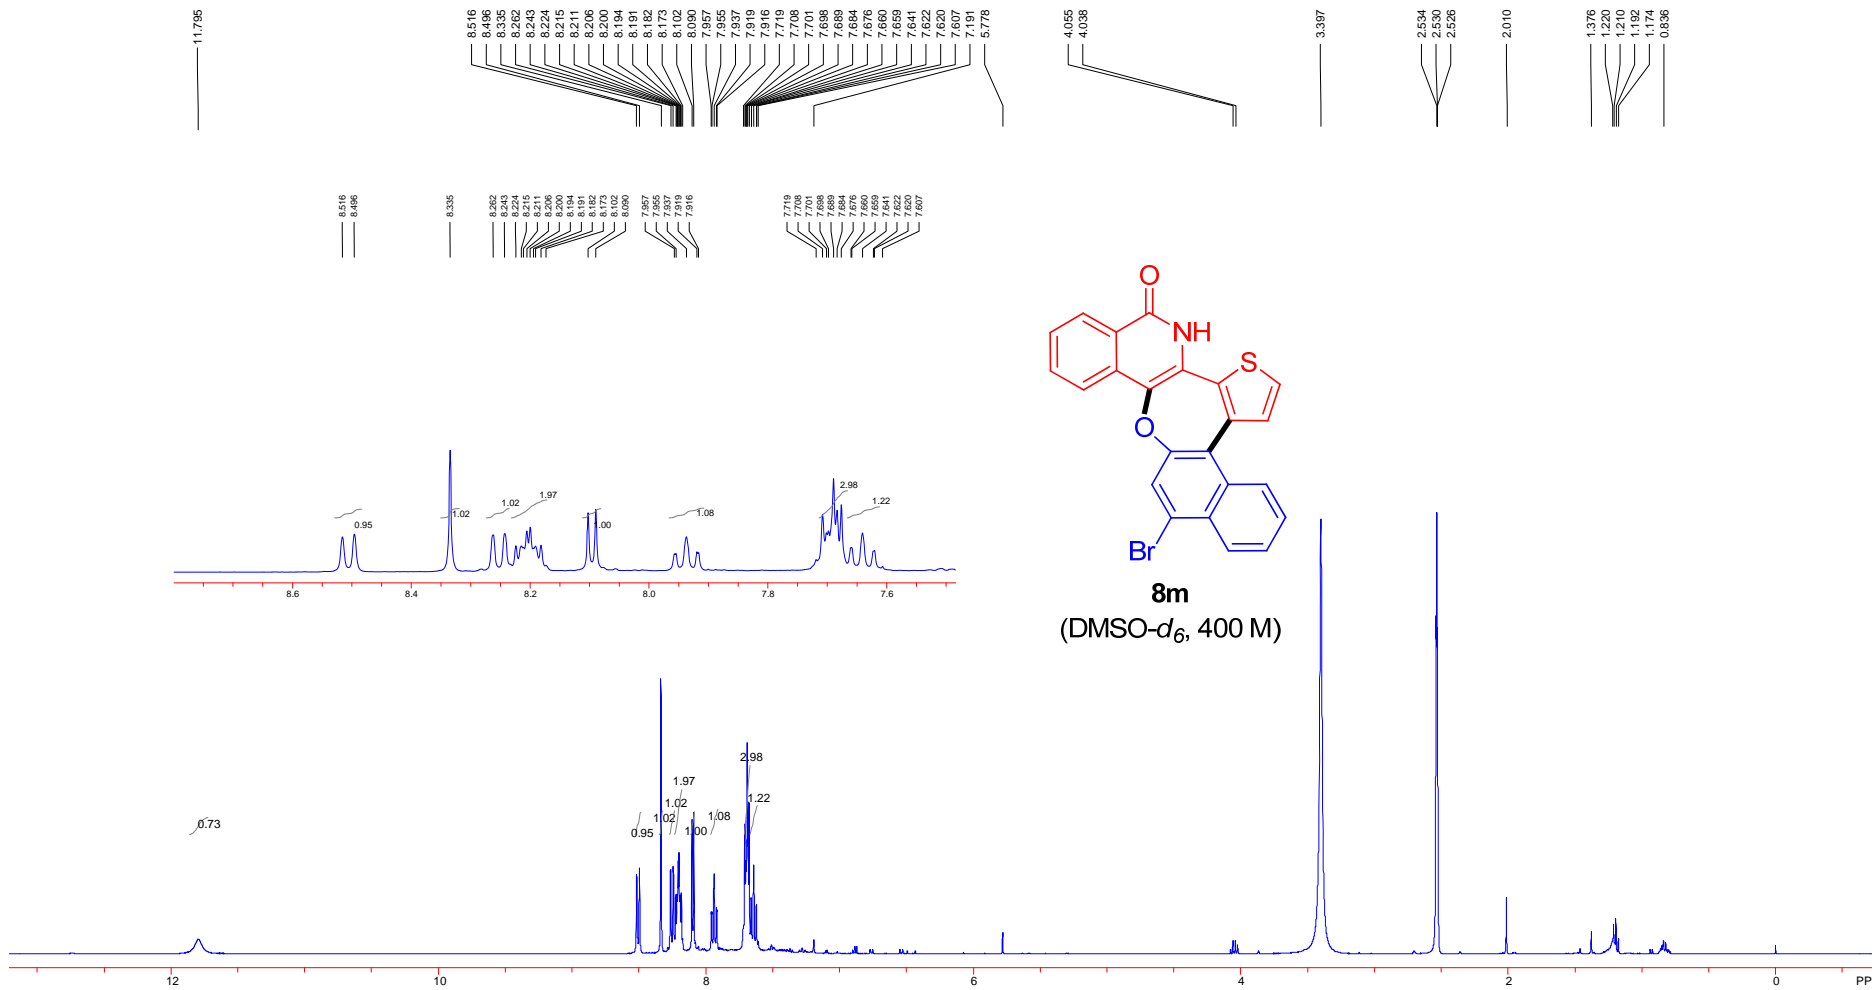



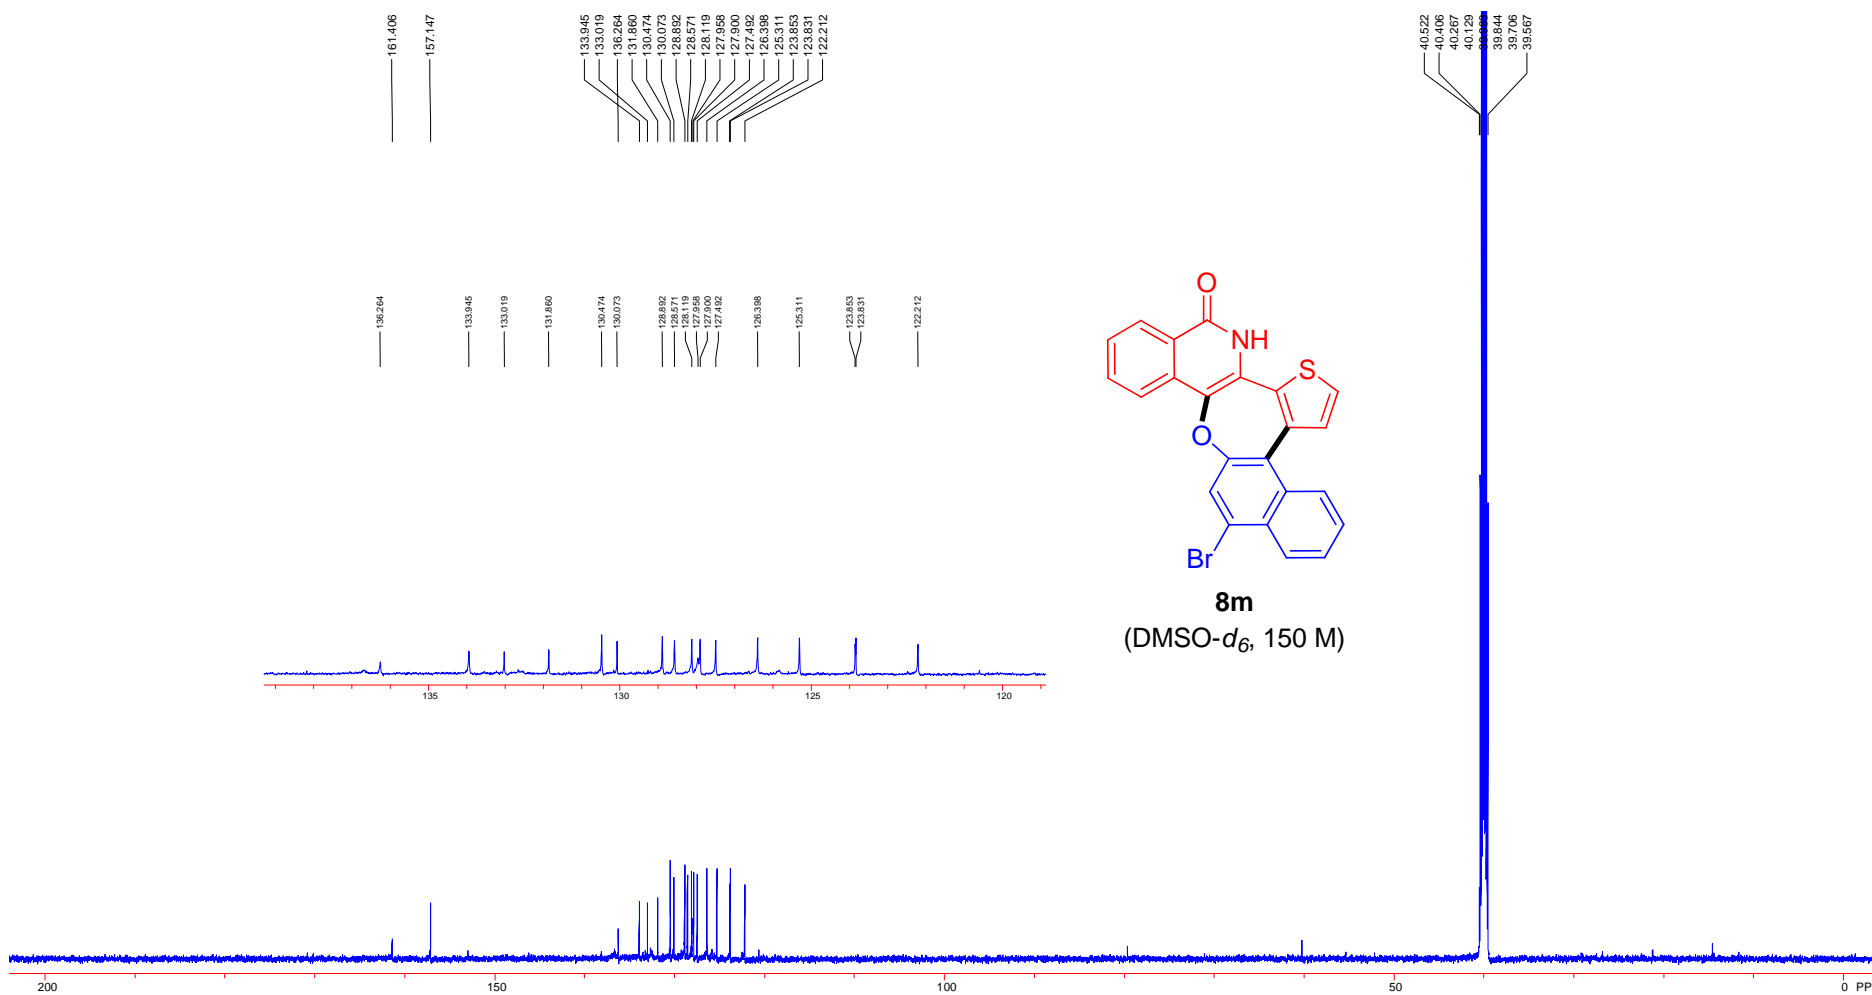

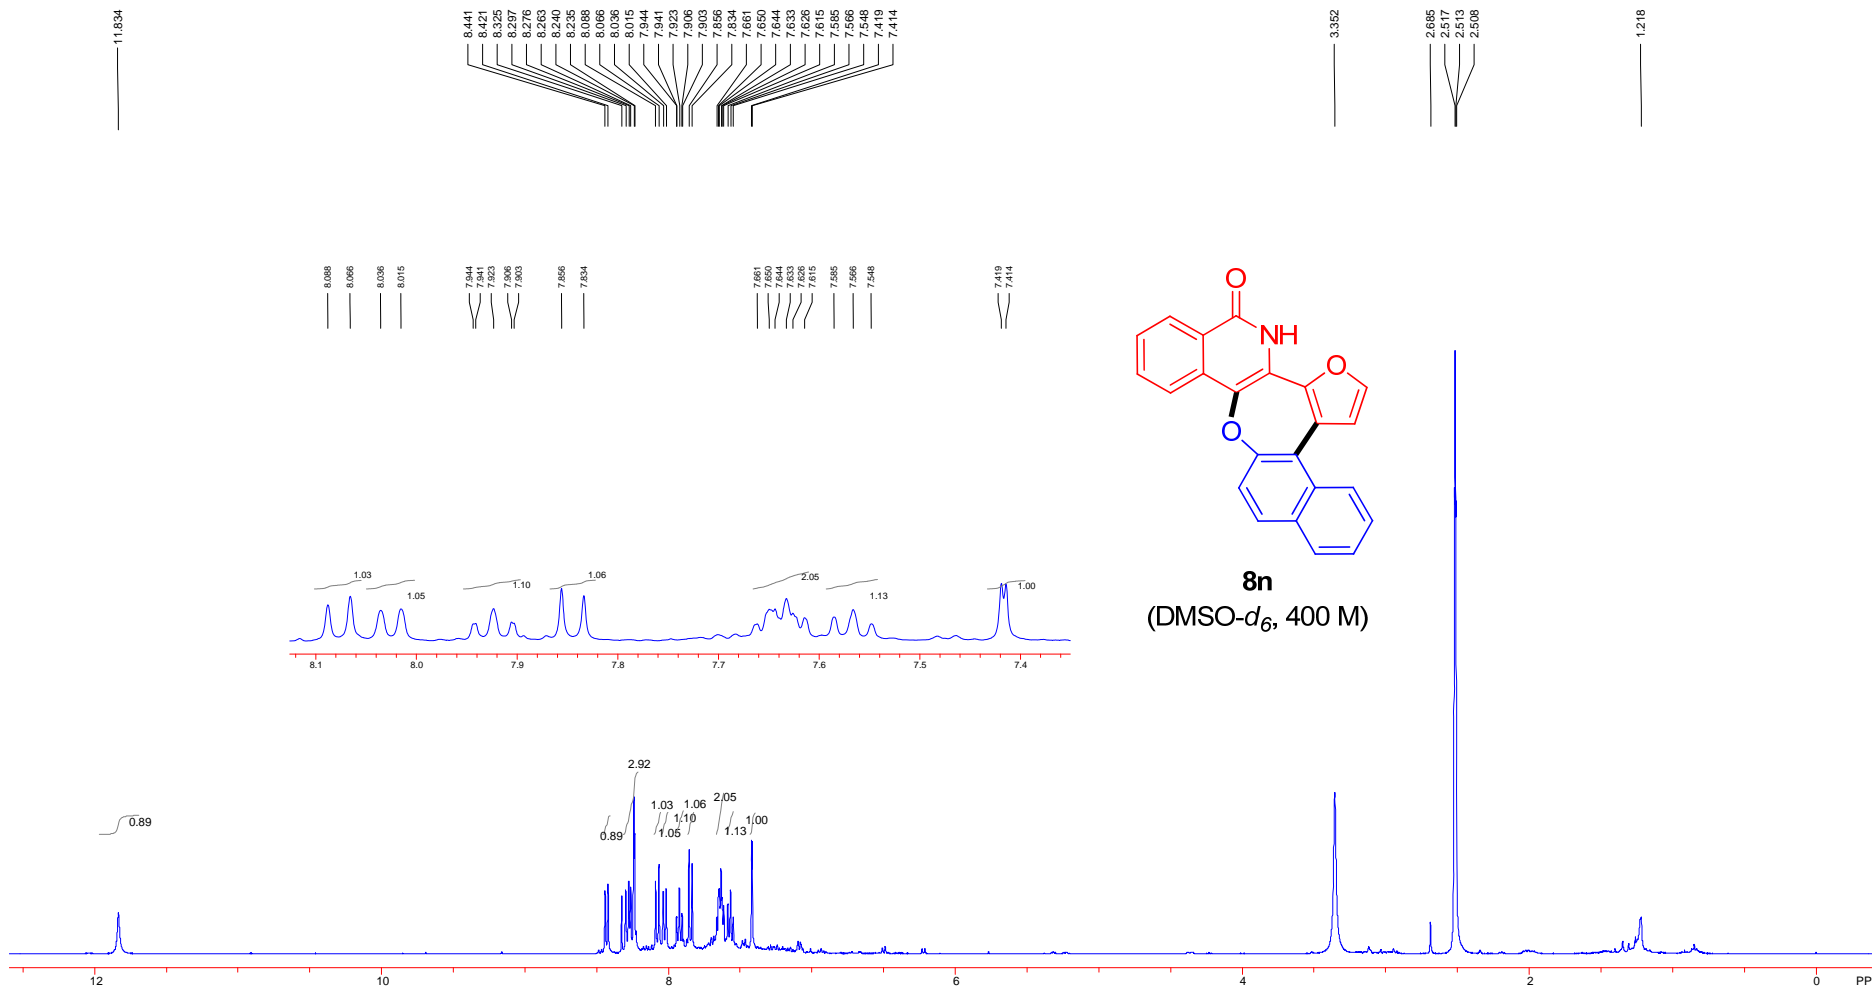

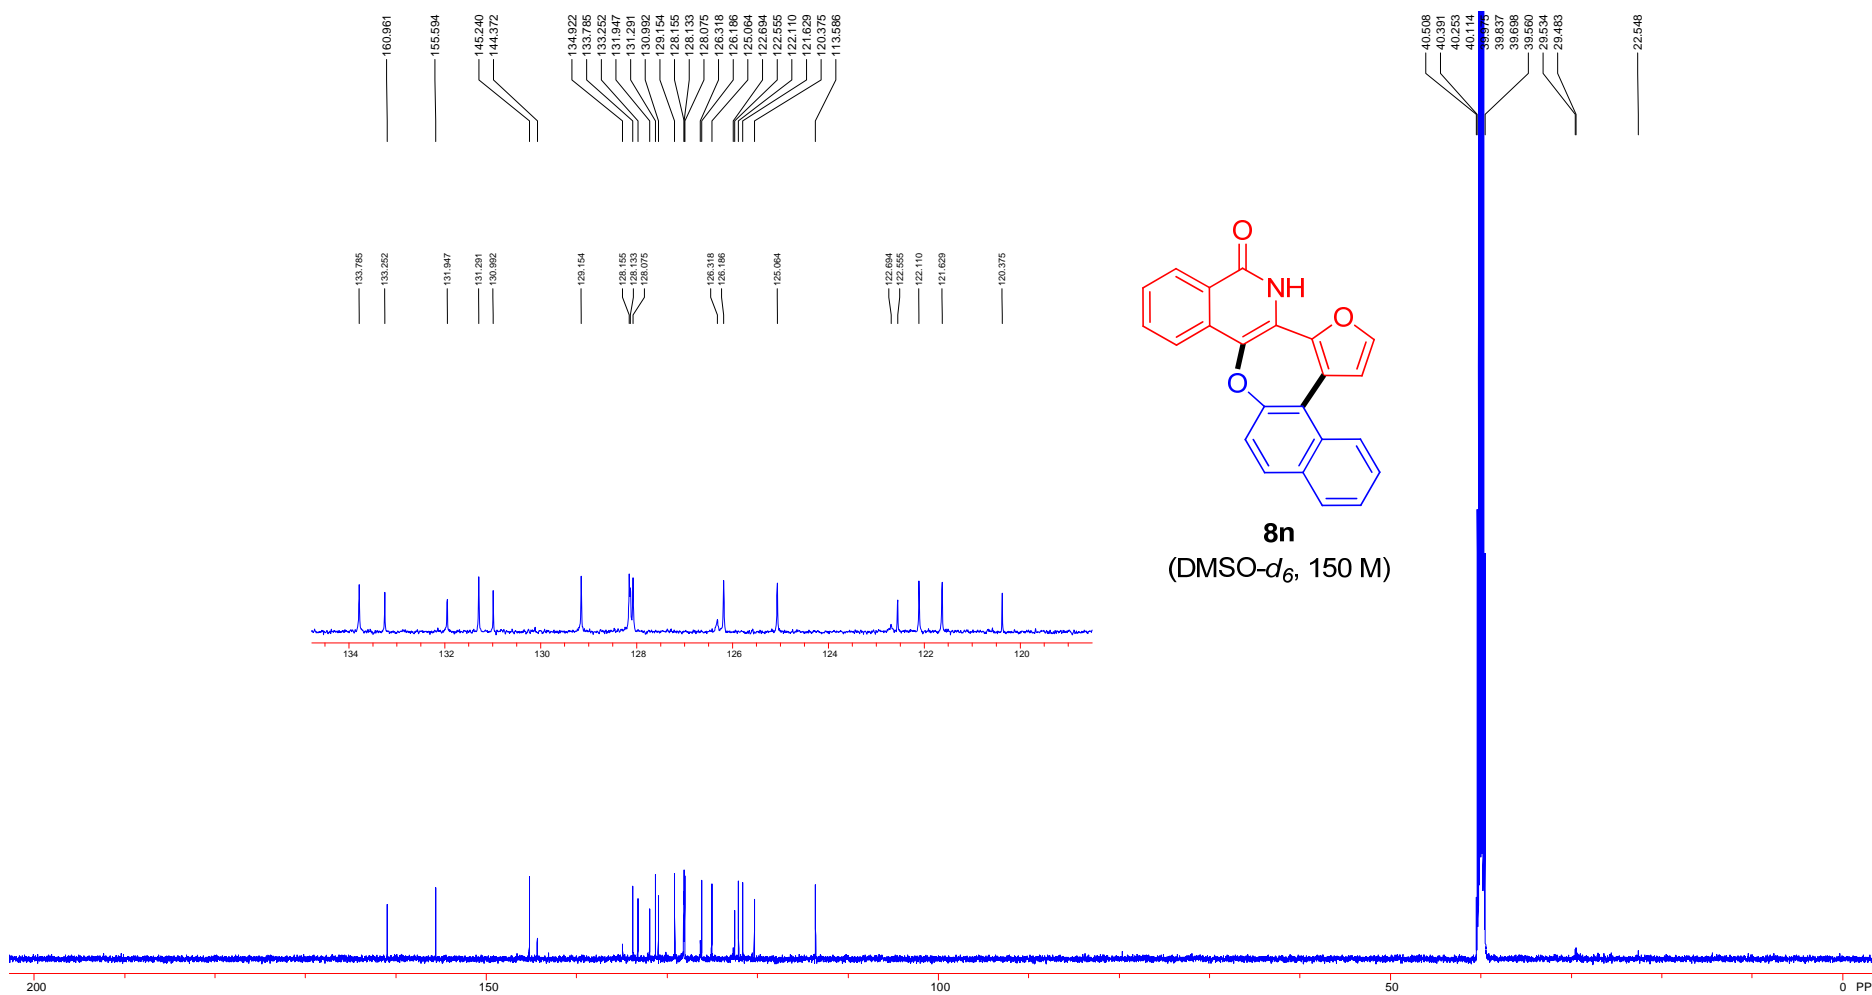

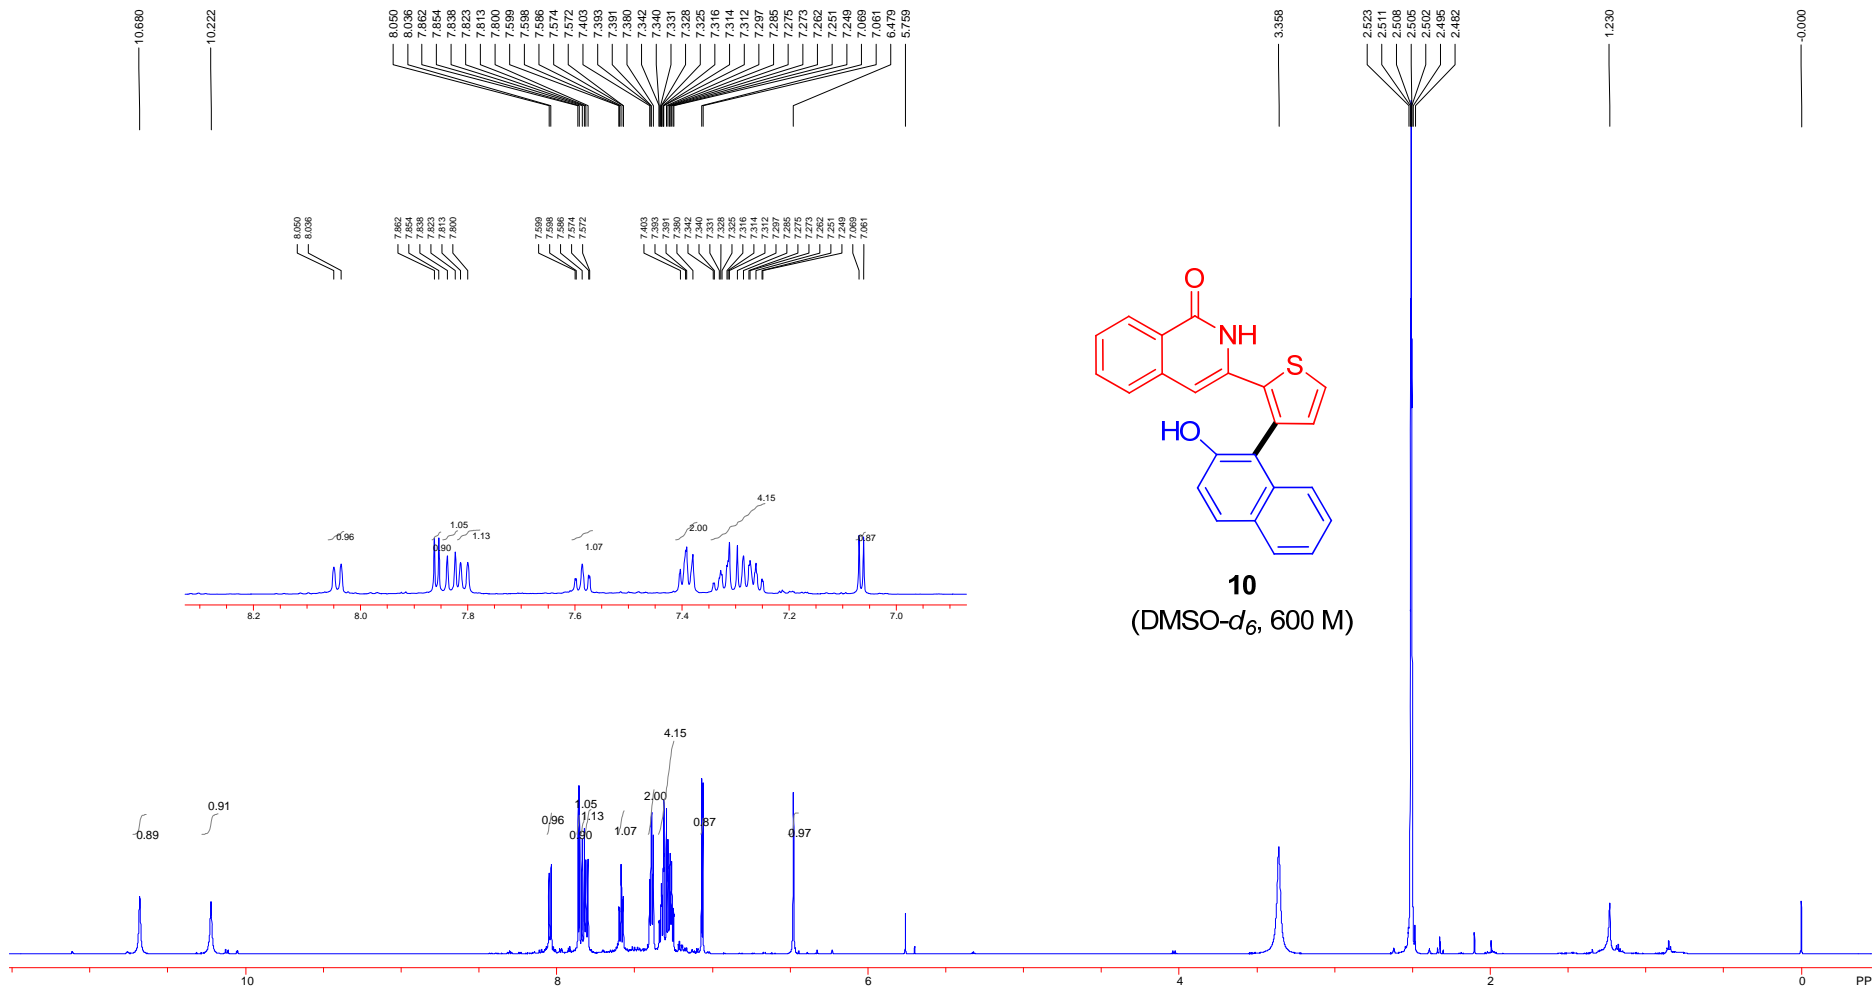

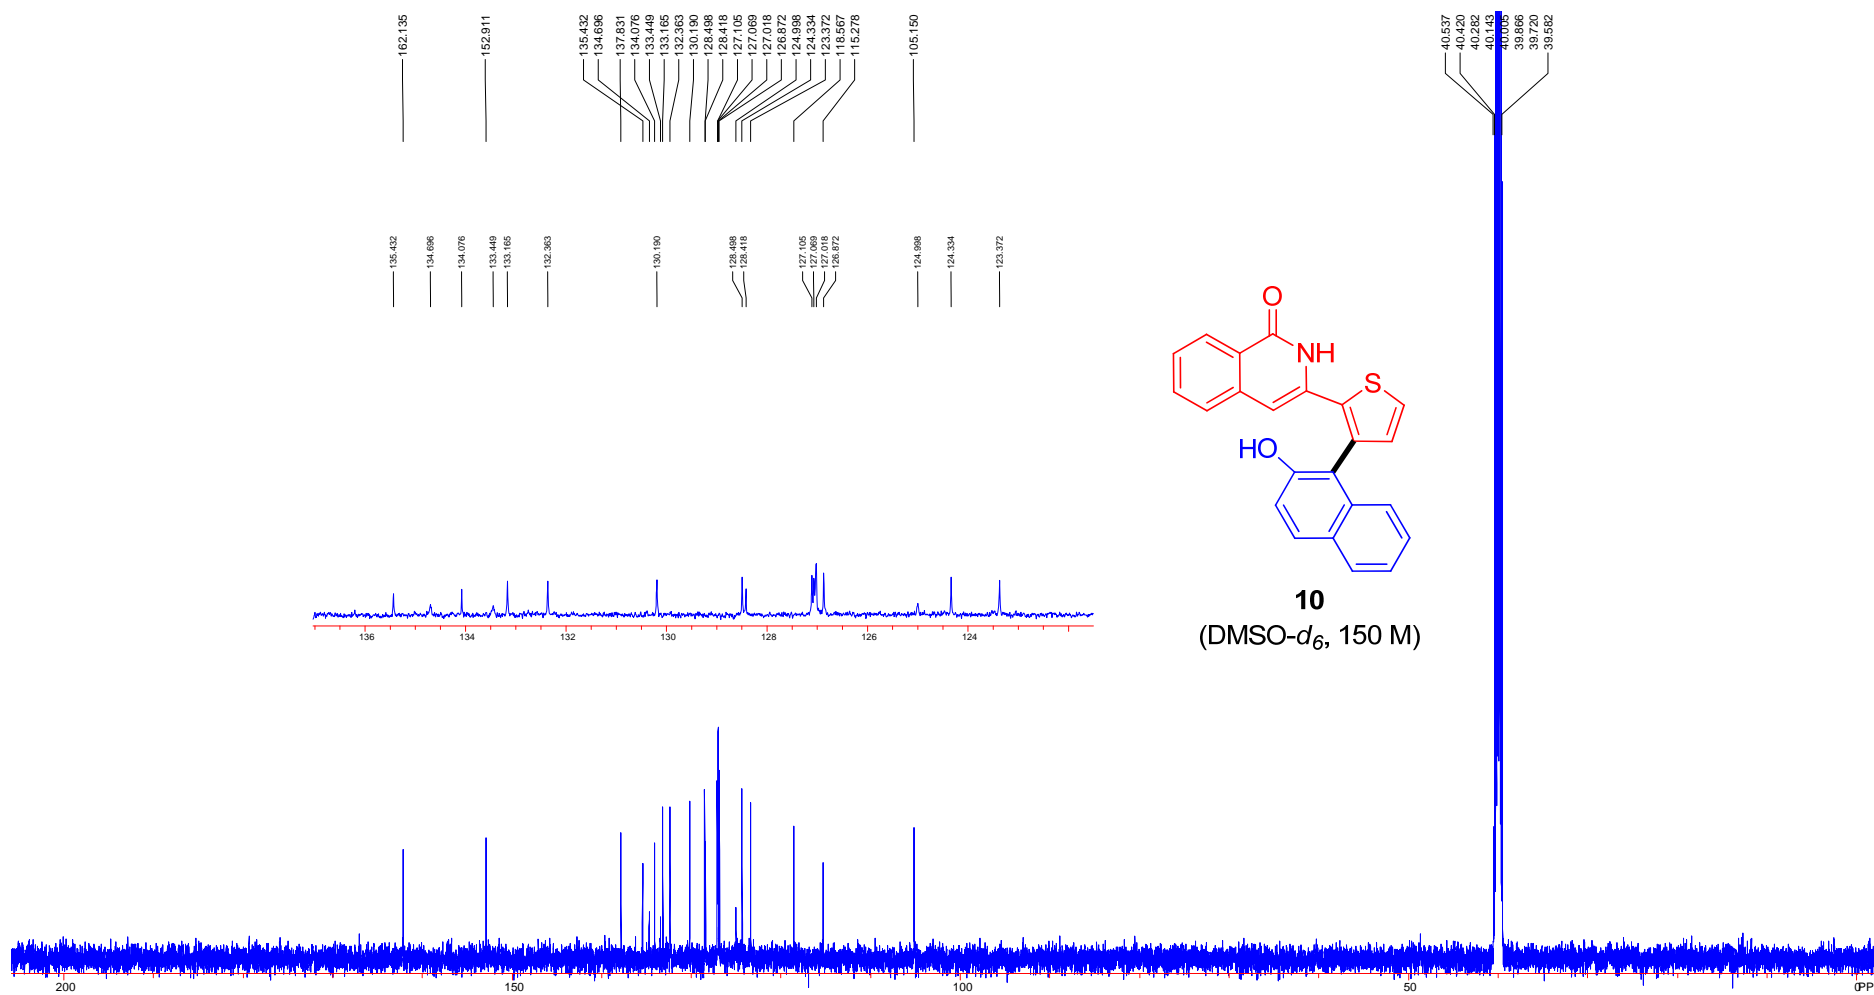

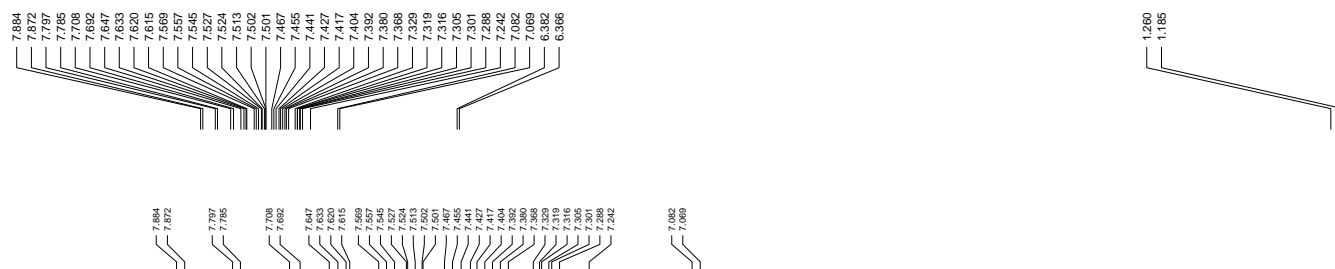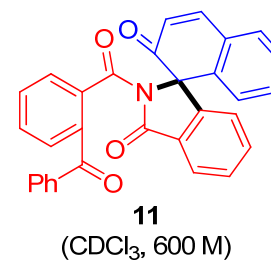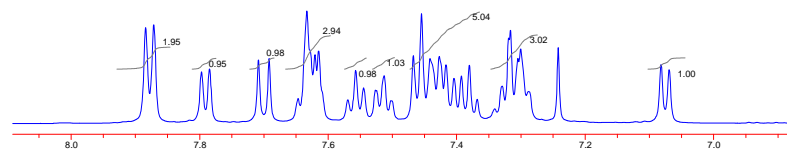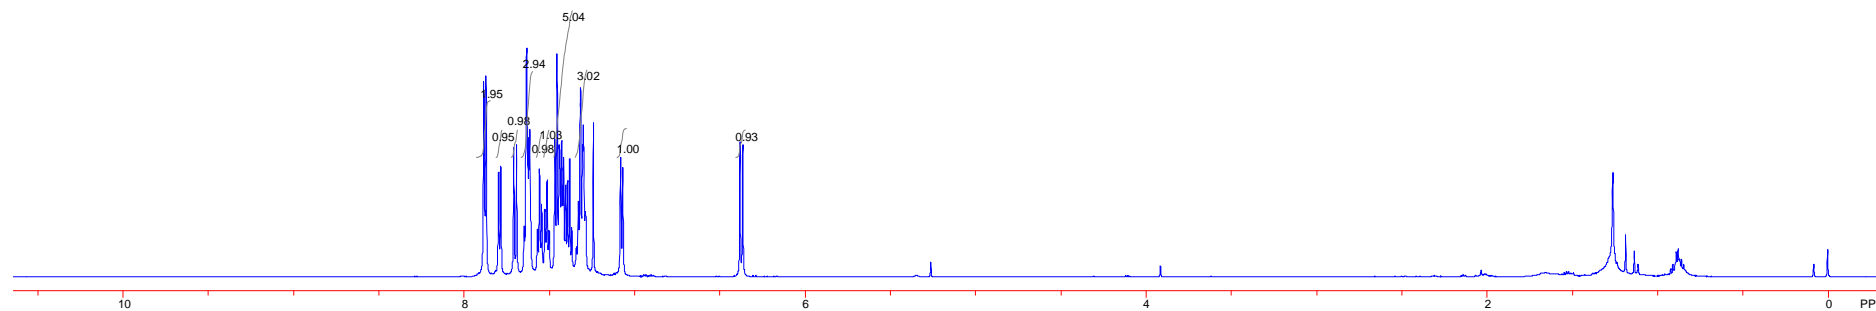

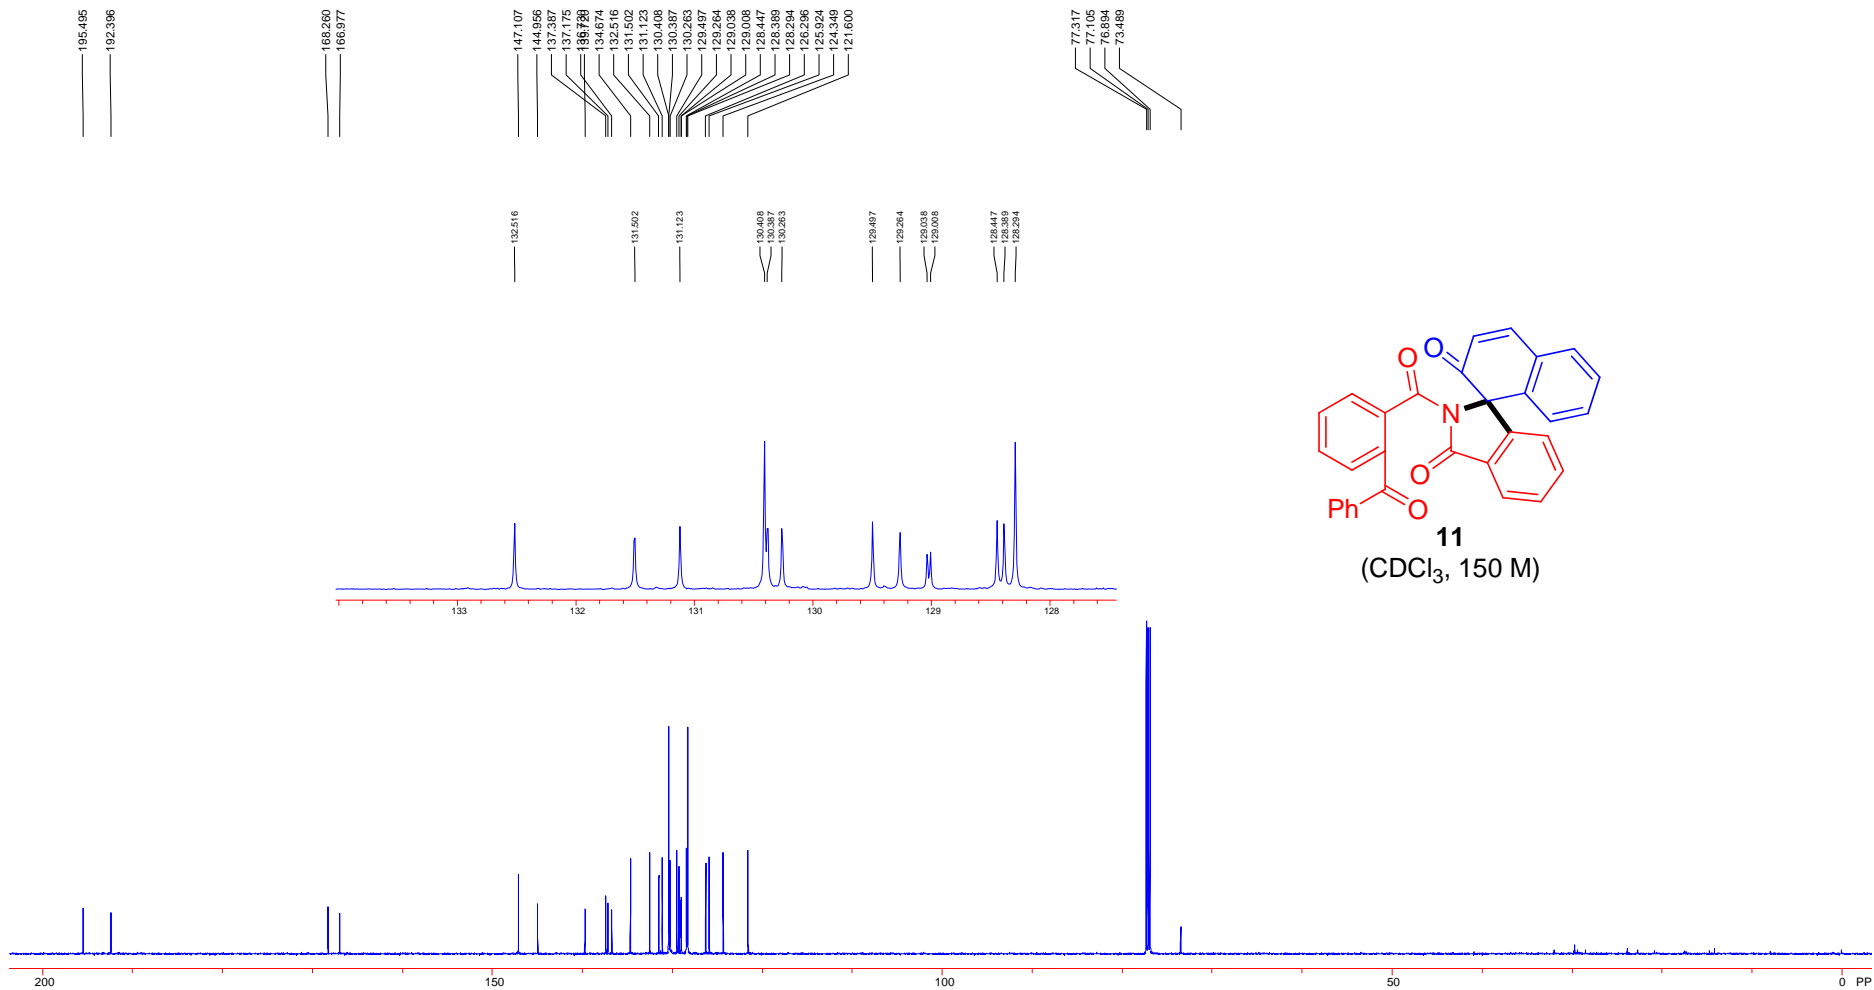

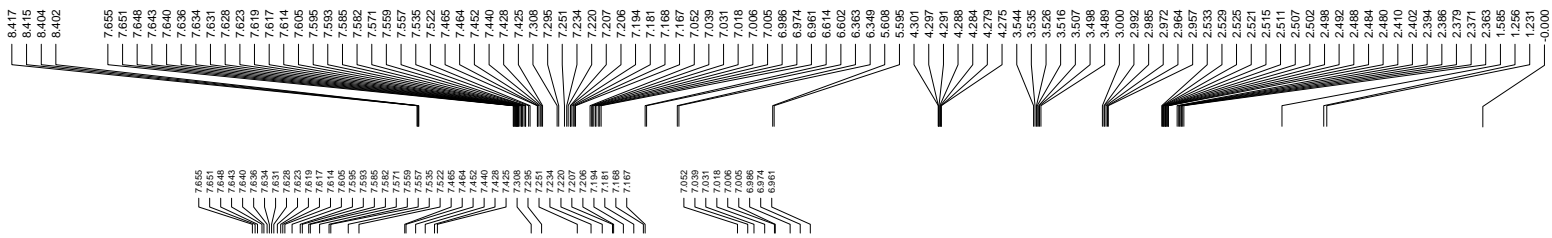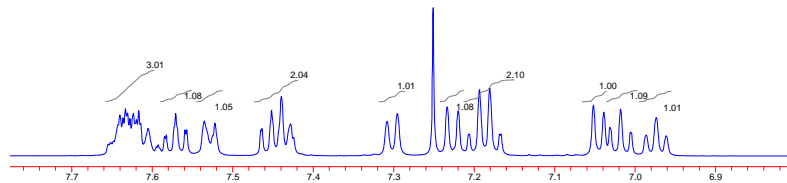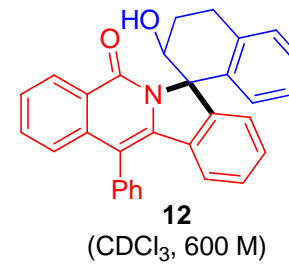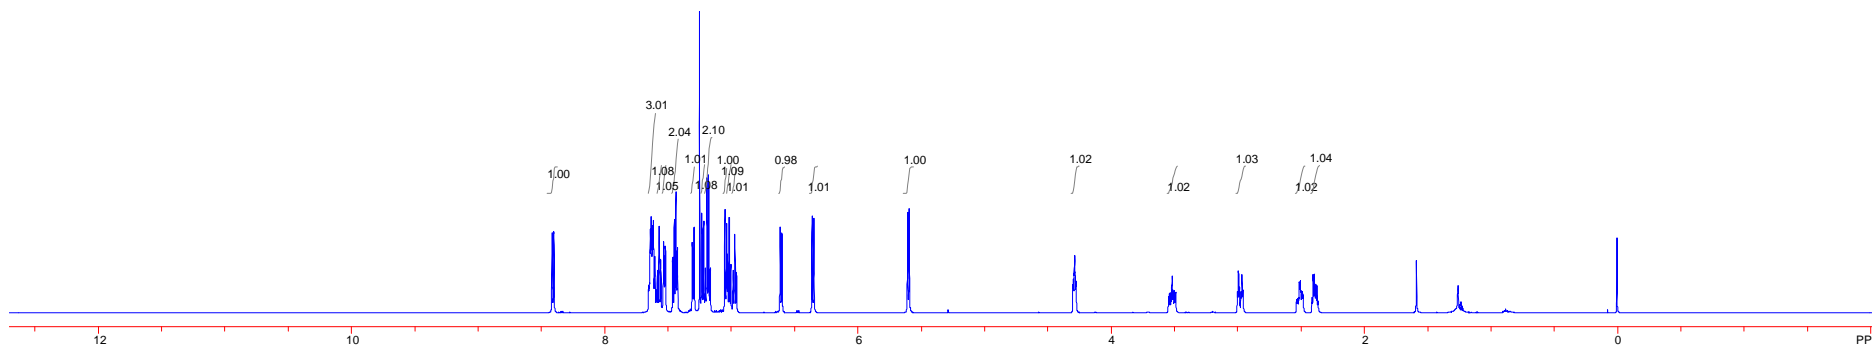



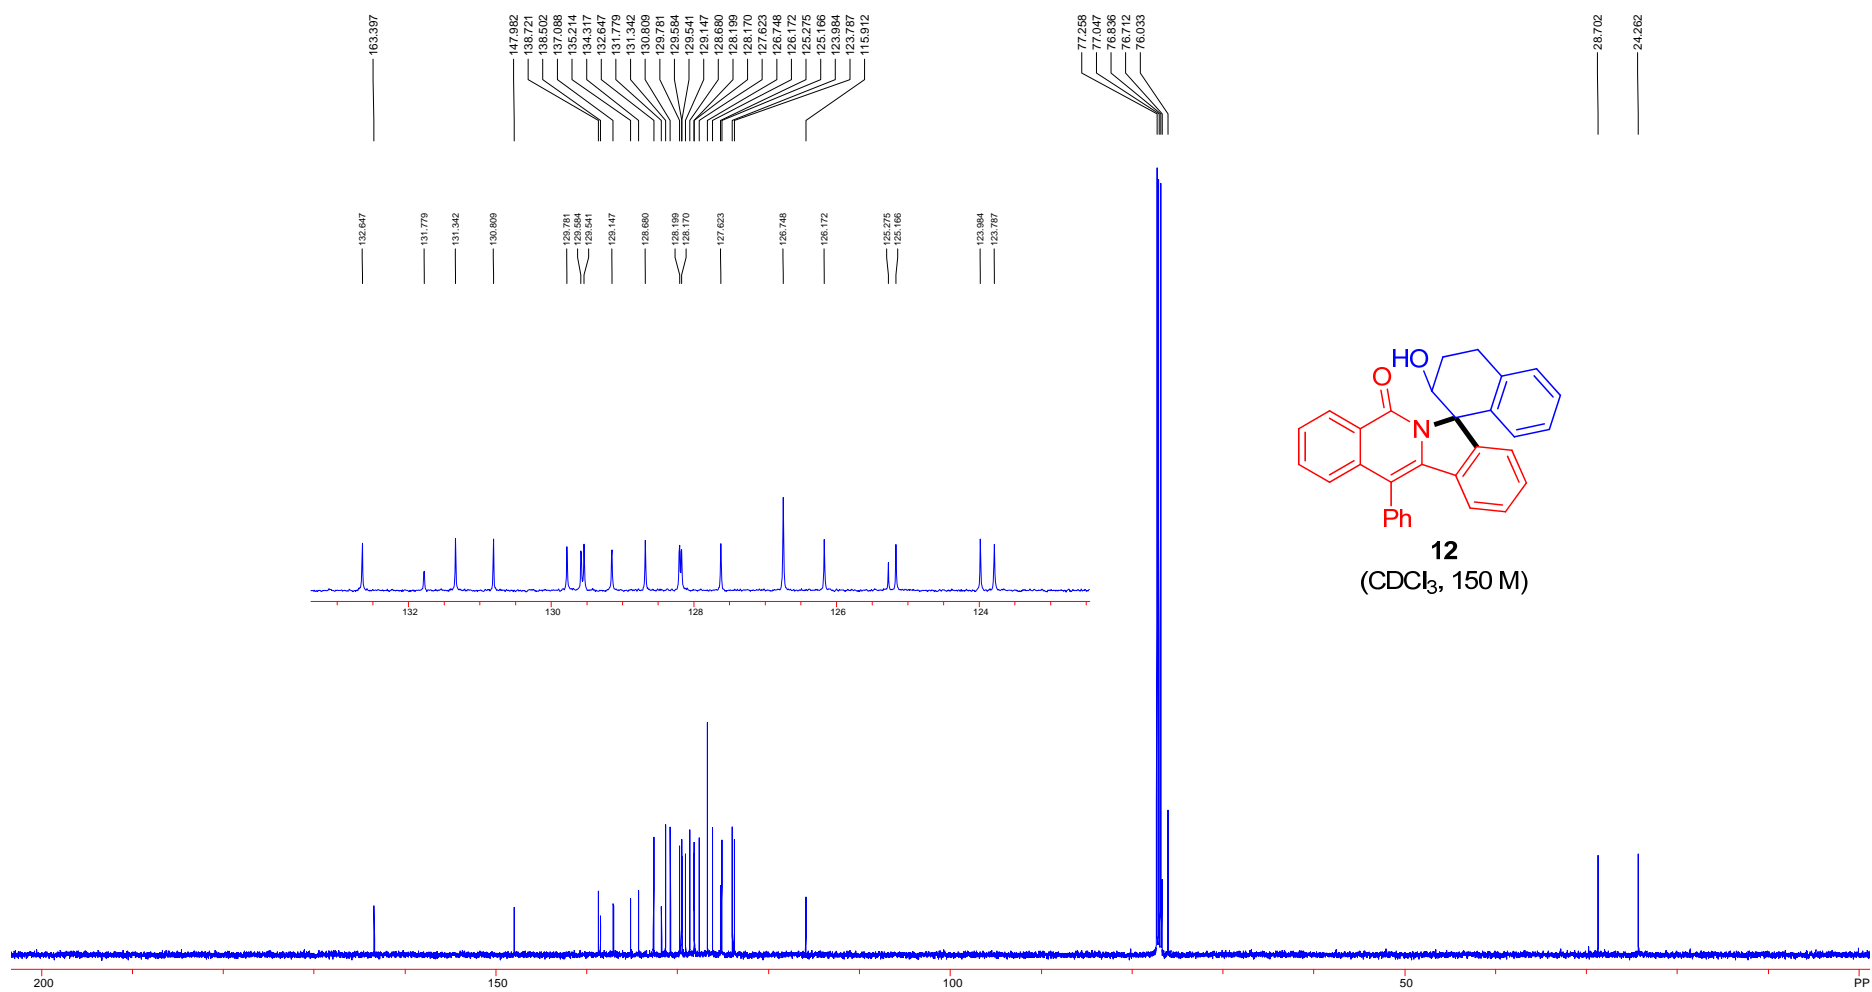

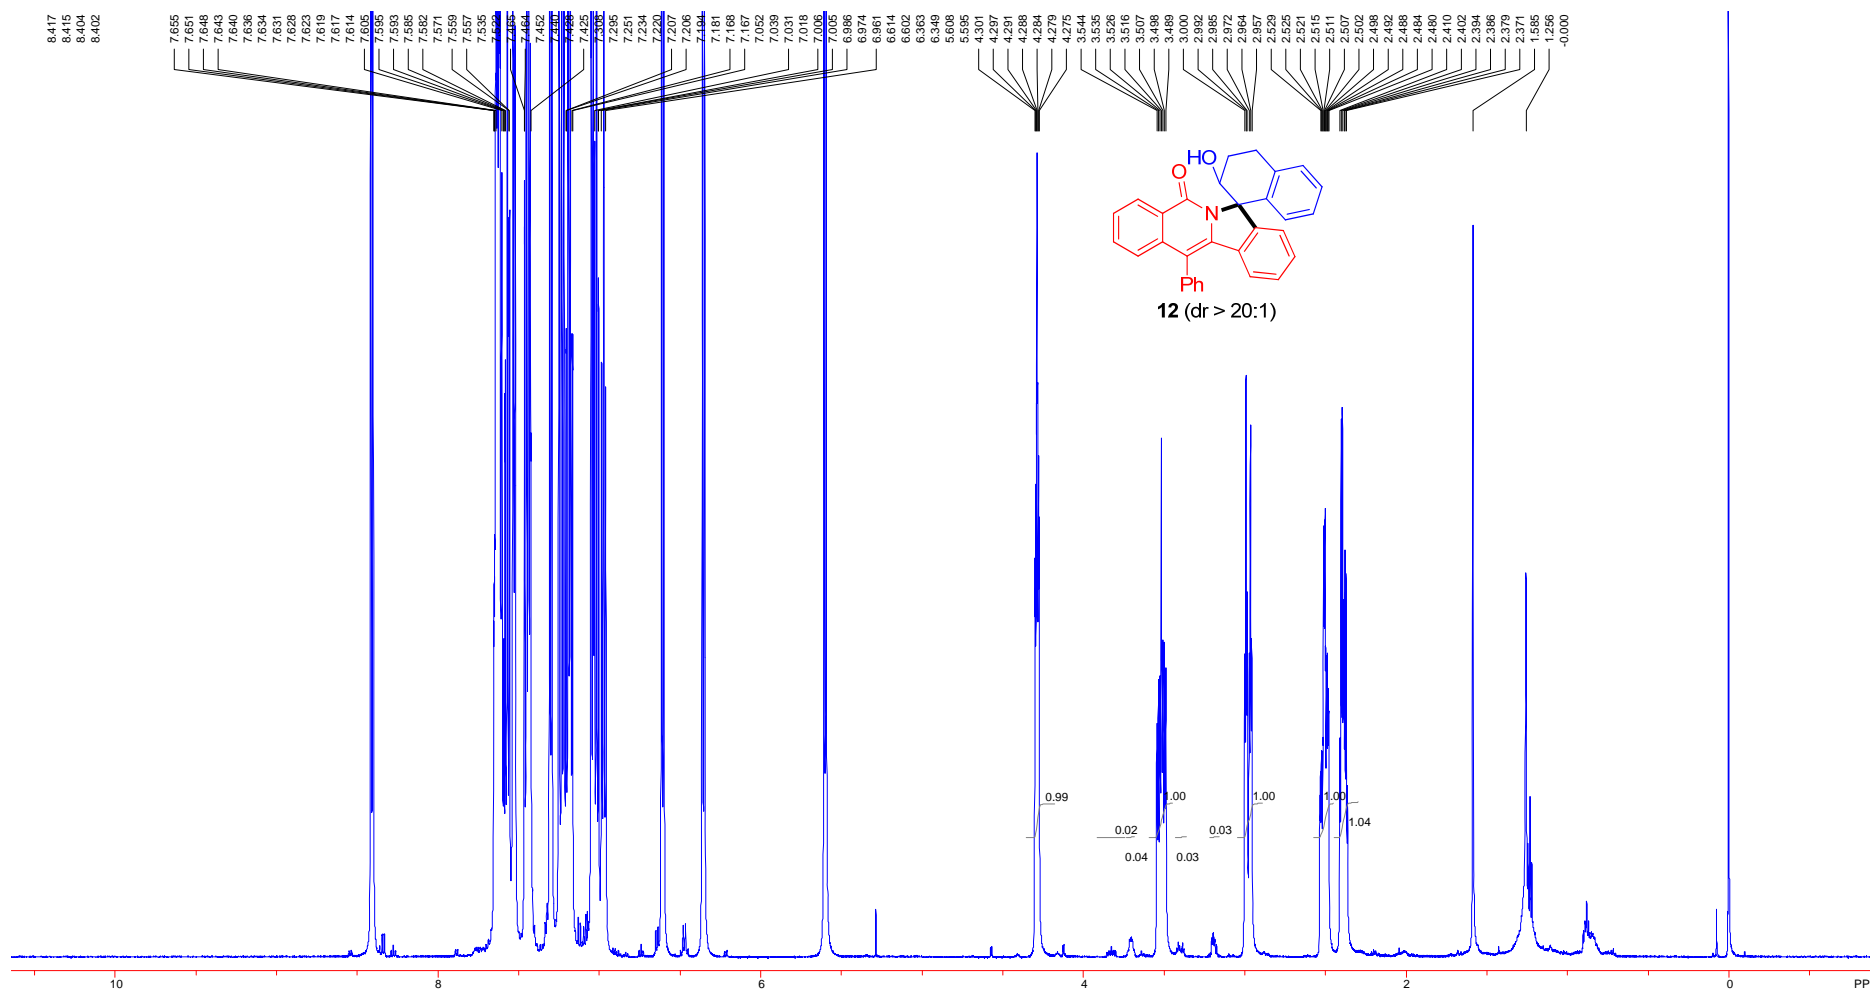

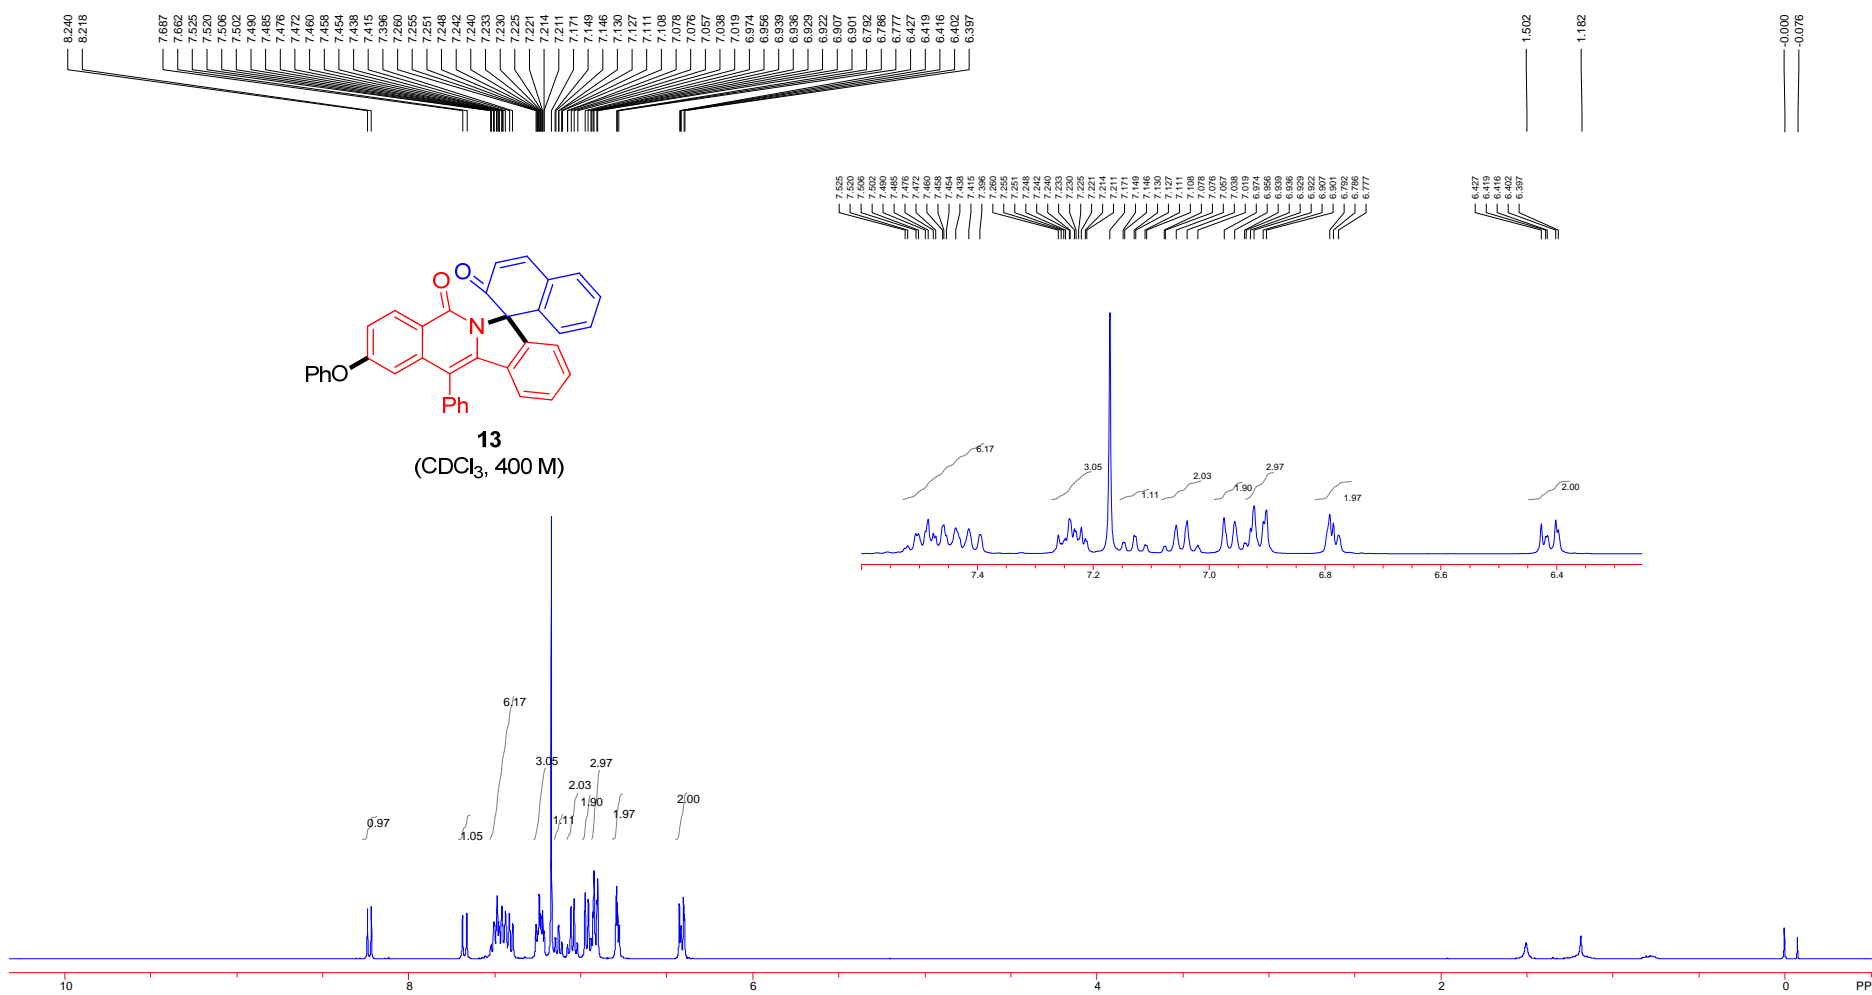

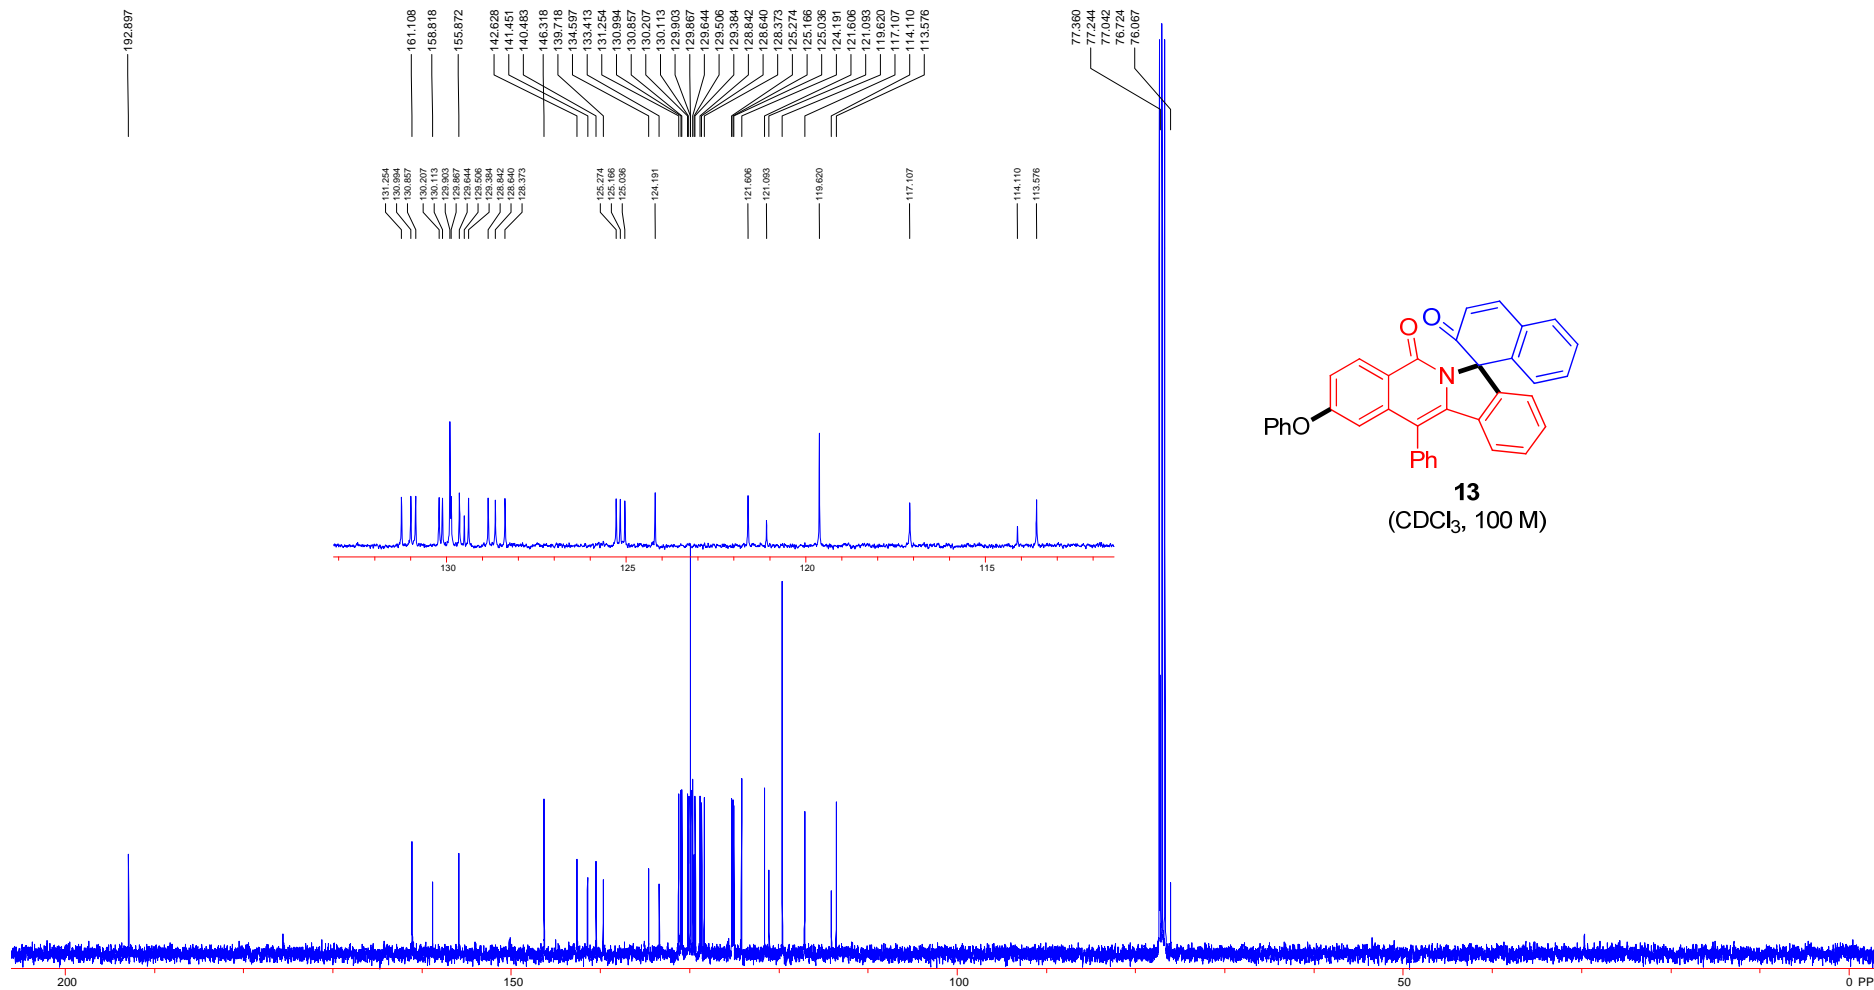

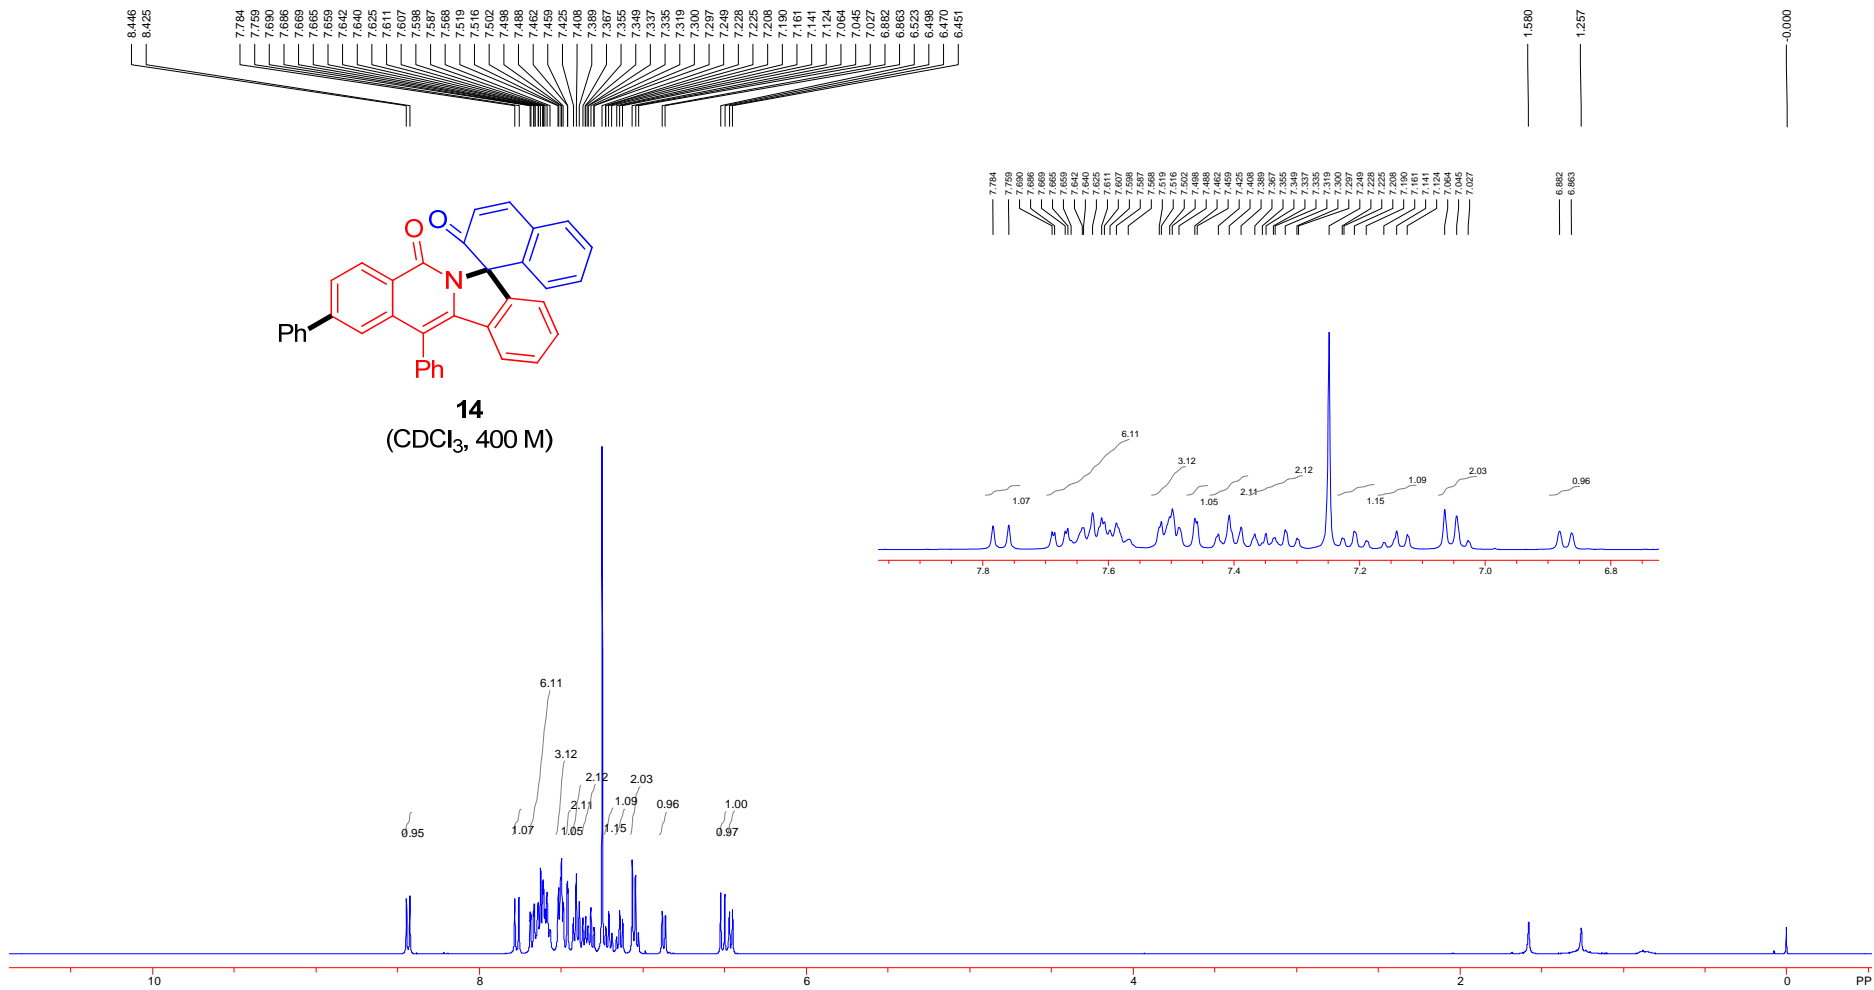

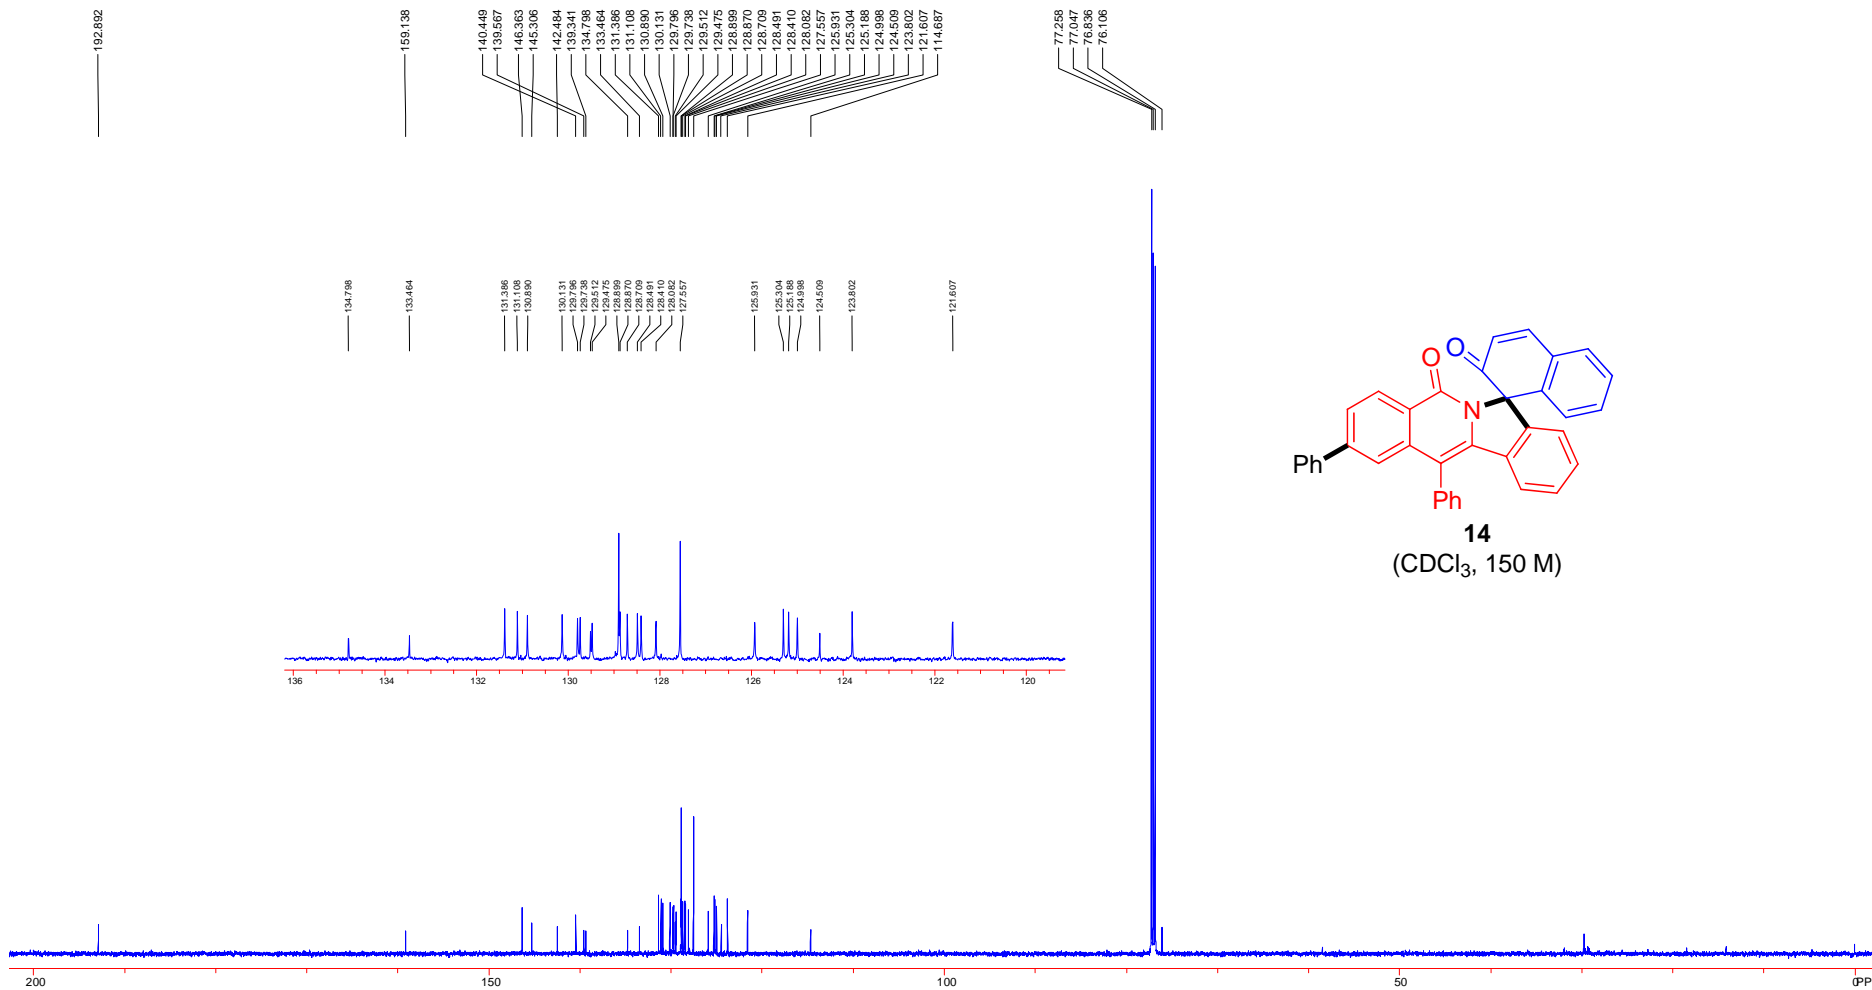

Supplement: d2qo01322c1.pdf [file d2qo01322c1.pdf]
